# Supplementary material for: Mouse brain transcriptome responses to inhaled nanoparticulate matter differed by sex and APOE in Nrf2-Nfkb interactions
Source: eLife. 2020 Jun 24;9:e54822. doi: 10.7554/eLife.54822 (PMC7314548; doi:10.7554/eLife.54822)
Supplement: Supplementary file 2. [file elife-54822-supp2.xlsx]

## Sheet: Full model nPM vs Ct p<0.05
Gene Symbol	Chromosome	Start	Stop	Strand	gene_name	gene_type	logFC	AveExpr	t	P.Value	adj.P.Val
Mmp24	2	155775342	155818367	+	Mmp24	protein_coding	0.311452	5.76764	4.09254	0.000166099	0.507327
Hk1	10	62268855	62379909	-	Hk1	protein_coding	0.378927	8.41623	4.05335	0.000188075	0.507327
Pkn1	8	83666536	83699180	-	Pkn1	protein_coding	0.309176	5.03751	4.02821	0.000203627	0.507327
Cep131	11	120064430	120086828	-	Cep131	protein_coding	0.42747	3.33338	4.02242	0.000207378	0.507327
Pkd1l3	8	109614517	109674387	+	Pkd1l3	protein_coding	0.338713	1.12767	3.83312	0.000374658	0.507327
Wdr90	17	25844771	25861502	-	Wdr90	protein_coding	0.480815	3.7771	3.79279	0.000424319	0.507327
Adgrb2	4	129984870	130022634	+	Adgrb2	protein_coding	0.422534	7.71505	3.74428	0.00049248	0.507327
Mgat5b	11	116918863	116986949	+	Mgat5b	protein_coding	0.556821	6.40286	3.67771	0.000603343	0.507327
Mafg	11	120625117	120633601	-	Mafg	protein_coding	0.299085	5.26369	3.64553	0.000665203	0.507327
Acap3	4	155891822	155907252	+	Acap3	protein_coding	0.392686	6.84602	3.62685	0.000703838	0.507327
Chrm1	19	8663789	8683588	+	Chrm1	protein_coding	0.34287	7.70916	3.61682	0.000725461	0.507327
Mmadhc	2	50279881	50296802	-	Mmadhc	protein_coding	-0.214299	5.12202	-3.59102	0.000784066	0.507327
Tbc1d25	X	8154472	8176182	-	Tbc1d25	protein_coding	0.279199	4.1596	3.53776	0.00091968	0.507327
Anxa4	6	86736840	86793585	-	Anxa4	protein_coding	-0.33065	2.42247	-3.46168	0.00115284	0.507327
Plxnd1	6	115954811	115995006	-	Plxnd1	protein_coding	0.371868	6.35901	3.45429	0.00117827	0.507327
Rap1a	3	105727267	105801337	-	Rap1a	protein_coding	-0.326115	4.99324	-3.44626	0.00120649	0.507327
Zbtb7a	10	81135220	81152996	+	Zbtb7a	protein_coding	0.259373	6.99837	3.43958	0.0012305	0.507327
Ints1	5	139751282	139775675	-	Ints1	protein_coding	0.401389	5.36552	3.43294	0.00125479	0.507327
Tmem63c	12	87021340	87090044	+	Tmem63c	protein_coding	0.375431	5.11084	3.42915	0.00126887	0.507327
Per2	1	91415982	91459325	-	Per2	protein_coding	0.413926	5.55125	3.41236	0.00133302	0.507327
Ptprs	17	56412426	56476484	-	Ptprs	protein_coding	0.30529	8.14058	3.40425	0.00136512	0.507327
Tnrc6c	11	117654289	117763440	+	Tnrc6c	protein_coding	0.427851	6.33792	3.40393	0.00136638	0.507327
Scube2	7	109798676	109865680	-	Scube2	protein_coding	0.311841	0.861473	3.38155	0.00145888	0.507327
Cep164	9	45766946	45828692	-	Cep164	protein_coding	0.457979	3.59424	3.37675	0.00147945	0.507327
Actl10	2	154551776	154553277	+	Actl10	protein_coding	0.335919	1.15107	3.35797	0.00156276	0.507327
Spata2	2	167481133	167492888	-	Spata2	protein_coding	0.255933	6.40995	3.3524	0.00158827	0.507327
Rptor	11	119602905	119899577	+	Rptor	protein_coding	0.235592	6.24819	3.35043	0.0015974	0.507327
Phyhip	14	70457476	70468833	+	Phyhip	protein_coding	0.317687	9.43294	3.34744	0.00161135	0.507327
Smg9	7	24399619	24422779	+	Smg9	protein_coding	0.24037	4.58185	3.34737	0.00161167	0.507327
Iqsec2	X	152144268	152225237	+	Iqsec2	protein_coding	0.429061	7.61422	3.34701	0.00161339	0.507327
Smarca4	9	21616169	21704231	+	Smarca4	protein_coding	0.330937	6.91195	3.34319	0.00163139	0.507327
Zfyve28	5	34194893	34288450	-	Zfyve28	protein_coding	0.278033	5.98946	3.33939	0.00164949	0.507327
Grin1	2	25291181	25319188	-	Grin1	protein_coding	0.434383	7.98809	3.33888	0.00165196	0.507327
Synpo	18	60593973	60660143	-	Synpo	protein_coding	0.385021	7.96614	3.33211	0.00168472	0.507327
Cabin1	10	75646112	75764342	-	Cabin1	protein_coding	0.375255	6.48988	3.33143	0.00168805	0.507327
Nol7	13	43398390	43407098	+	Nol7	protein_coding	-0.382689	4.498	-3.3211	0.00173936	0.507327
Pcgf2	11	97688823	97700498	-	Pcgf2	protein_coding	0.384919	4.0619	3.3199	0.00174538	0.507327
Gm6566	12	87149475	87155487	-	Gm6566	antisense	0.264631	0.93396	3.31014	0.00179538	0.507327
Zdhhc8	16	18220753	18235137	-	Zdhhc8	protein_coding	0.475762	6.71115	3.30575	0.00181831	0.507327
Safb	17	56584825	56606295	+	Safb	protein_coding	0.303433	5.74674	3.30233	0.00183636	0.507327
Gm11837	4	14929908	14953031	+	Gm11837	antisense	-0.403577	0.490838	-3.29946	0.00185164	0.507327
Mical3	6	120931707	121131000	-	Mical3	protein_coding	0.414467	6.6219	3.28099	0.00195289	0.507327
Cpne6	14	55510445	55517432	+	Cpne6	protein_coding	0.325218	6.29224	3.27261	0.00200057	0.507327
Iqce	5	140661827	140702379	-	Iqce	protein_coding	0.341346	4.74716	3.24801	0.0021469	0.507327
Capn15	17	25958364	25985797	-	Capn15	protein_coding	0.568599	4.74704	3.24613	0.0021585	0.507327
Dnajc15	14	77820681	77875126	-	Dnajc15	protein_coding	-0.276825	4.76713	-3.24586	0.00216014	0.507327
Miat	5	112213228	112229396	-	Miat	lincRNA	0.597533	8.34725	3.24385	0.00217265	0.507327
Zswim8	14	20707552	20723620	+	Zswim8	protein_coding	0.3873	6.29864	3.24156	0.00218691	0.507327
Uox	3	146570426	146632306	+	Uox	protein_coding	-0.259864	0.761301	-3.22645	0.00228339	0.507327
Lamp2	X	38401357	38456455	-	Lamp2	protein_coding	-0.262599	6.53615	-3.22604	0.00228608	0.507327
Dagla	19	10245265	10304878	-	Dagla	protein_coding	0.502993	6.70149	3.22152	0.00231574	0.507327
Acvr1b	15	101174067	101213685	+	Acvr1b	protein_coding	0.248879	6.9814	3.20922	0.00239837	0.507327
Zfp382	7	30121942	30134951	+	Zfp382	protein_coding	0.387745	3.15623	3.20815	0.00240567	0.507327
Dgkq	5	108646693	108669673	-	Dgkq	protein_coding	0.339789	4.64314	3.19774	0.00247797	0.507327
Sez6l2	7	126950563	126970607	+	Sez6l2	protein_coding	0.311567	7.74641	3.1928	0.00251298	0.507327
Natd1	11	60902246	60914751	-	Natd1	protein_coding	0.268858	4.3446	3.19075	0.00252763	0.507327
Plppr2	9	21937033	21948908	+	Plppr2	protein_coding	0.414356	6.96375	3.18986	0.00253406	0.507327
Snrpf	10	93583029	93589707	-	Snrpf	protein_coding	-0.257449	1.75801	-3.18945	0.002537	0.507327
Syngr1	15	80091334	80119502	+	Syngr1	protein_coding	0.242627	9.50985	3.18547	0.00256582	0.507327
Anxa8	14	34085981	34100572	+	Anxa8	protein_coding	-0.227982	0.418881	-3.18506	0.0025688	0.507327
Kcnh3	15	99224861	99242818	+	Kcnh3	protein_coding	0.411006	6.9553	3.18394	0.00257699	0.507327
Btbd9	17	30215524	30576288	-	Btbd9	protein_coding	0.234127	6.4651	3.18379	0.00257808	0.507327
Laptm4a	12	8921664	8938743	+	Laptm4a	protein_coding	-0.226565	7.68207	-3.17281	0.00265951	0.507327
Unc5a	13	54949411	55006019	+	Unc5a	protein_coding	0.46382	6.33904	3.17041	0.00267762	0.507327
Numa1	7	101934111	102014965	+	Numa1	protein_coding	0.425039	6.38357	3.16987	0.00268171	0.507327
Zdhhc22	12	86980763	86990431	-	Zdhhc22	protein_coding	0.288425	4.57339	3.16584	0.00271247	0.507327
Igsf8	1	172261641	172319842	+	Igsf8	protein_coding	0.311774	7.10475	3.16486	0.00272	0.507327
Scmh1	4	120405281	120530187	+	Scmh1	protein_coding	0.344248	5.27192	3.16206	0.00274157	0.507327
Tmsb15b1	X	136974022	136976875	-	Tmsb15b1	protein_coding	-0.336581	1.37131	-3.15973	0.0027597	0.507327
Lingo1	9	56618475	56796469	-	Lingo1	protein_coding	0.325398	8.42711	3.1565	0.00278496	0.507327
Ppp6r1	7	4631495	4659020	-	Ppp6r1	protein_coding	0.200871	6.92032	3.15623	0.00278714	0.507327
Strn4	7	16815889	16840932	+	Strn4	protein_coding	0.284541	7.70359	3.15547	0.00279311	0.507327
Ipo13	4	117894486	117915000	-	Ipo13	protein_coding	0.23394	6.28213	3.15479	0.00279849	0.507327
Rapgefl1	11	98836785	98853698	+	Rapgefl1	protein_coding	0.425623	7.24923	3.14906	0.00284409	0.507327
Cadm3	1	173333258	173367696	-	Cadm3	protein_coding	0.23728	8.96946	3.1479	0.00285336	0.507327
Plekha4	7	45526330	45554230	+	Plekha4	protein_coding	0.248327	1.32588	3.1463	0.00286631	0.507327
Scube1	15	83604999	83725022	-	Scube1	protein_coding	0.523209	5.49846	3.14436	0.00288199	0.507327
Cacnb1	11	98001508	98023035	-	Cacnb1	protein_coding	0.393984	6.91585	3.14433	0.0028822	0.507327
Tmem45a	16	56805161	56886167	-	Tmem45a	protein_coding	-0.248091	0.817587	-3.13963	0.00292064	0.507327
Gsg1l	7	125878420	126082412	-	Gsg1l	protein_coding	0.253947	7.62436	3.13882	0.00292728	0.507327
Ntng2	2	29194541	29253006	-	Ntng2	protein_coding	0.492258	3.4938	3.1277	0.00302026	0.507327
Bmp1	14	70474558	70520235	-	Bmp1	protein_coding	0.414476	5.76114	3.12435	0.00304882	0.507327
Plec	15	76170974	76232575	-	Plec	protein_coding	0.680152	6.36187	3.12313	0.0030593	0.507327
Caskin2	11	115799183	115813640	-	Caskin2	protein_coding	0.450766	4.25599	3.12082	0.00307923	0.507327
Emc7	2	112454997	112472163	+	Emc7	protein_coding	-0.217477	6.5648	-3.12076	0.00307972	0.507327
Mef2d	3	88142372	88172087	+	Mef2d	protein_coding	0.361947	8.05748	3.11862	0.00309826	0.507327
Kdm4a	4	118136957	118180044	-	Kdm4a	protein_coding	0.259817	5.35999	3.11835	0.00310059	0.507327
Otx2	14	48657677	48673820	-	Otx2	protein_coding	-0.555872	1.14191	-3.11648	0.00311694	0.507327
Cspg4	9	56865033	56899871	+	Cspg4	protein_coding	0.351848	4.19432	3.11373	0.00314106	0.507327
Camsap3	8	3587293	3609076	+	Camsap3	protein_coding	0.317094	4.36291	3.11181	0.00315801	0.507327
6430548M08Rik	8	120114152	120165307	+	6430548M08Rik	protein_coding	0.227761	8.43617	3.10817	0.00319036	0.507327
Taok2	7	126865678	126884704	-	Taok2	protein_coding	0.263571	6.74919	3.10329	0.00323425	0.507327
Chd5	4	152338651	152390195	+	Chd5	protein_coding	0.41685	7.64518	3.10322	0.00323486	0.507327
Tnrc18	5	142724661	142817663	-	Tnrc18	protein_coding	0.474528	5.99123	3.10158	0.00324977	0.507327
Nptxr	15	79786351	79804767	-	Nptxr	protein_coding	0.549899	6.36201	3.10017	0.00326262	0.507327
Ndufa12	10	94198720	94221444	+	Ndufa12	protein_coding	-0.287888	5.45894	-3.09248	0.00333347	0.507327
Pnp2	14	50955992	50964750	+	Pnp2	protein_coding	-0.297076	2.42777	-3.0923	0.00333511	0.507327
Pin4	X	102119447	102127670	+	Pin4	protein_coding	-0.248351	1.90109	-3.08914	0.00336474	0.507327
Ptprn	1	75247027	75264503	-	Ptprn	protein_coding	0.33663	8.83556	3.08736	0.00338145	0.507327
Sirpa	2	129592835	129632229	+	Sirpa	protein_coding	0.17962	9.06535	3.08522	0.00340177	0.507327
Zfyve27	19	42163951	42194591	+	Zfyve27	protein_coding	0.238135	6.24152	3.07998	0.00345182	0.507327
Zfp319	8	95323011	95331951	-	Zfp319	protein_coding	0.296838	4.56226	3.07879	0.00346325	0.507327
Car13	3	14641727	14663003	+	Car13	protein_coding	-0.321533	0.966662	-3.07864	0.00346469	0.507327
Atg13	2	91674618	91710577	-	Atg13	protein_coding	0.179101	6.53755	3.0772	0.00347862	0.507327
Smarcd1	15	99702129	99713992	+	Smarcd1	protein_coding	0.317271	7.60035	3.07528	0.00349731	0.507327
Mink1	11	70562881	70614484	+	Mink1	protein_coding	0.403182	7.93345	3.06959	0.00355307	0.507327
Bag6	17	35135178	35147323	+	Bag6	protein_coding	0.313574	6.61097	3.05963	0.00365287	0.507327
Cetn2	X	72913532	72918412	-	Cetn2	protein_coding	-0.252658	5.29903	-3.05779	0.00367154	0.507327
Pitpnm2	5	124118690	124249761	-	Pitpnm2	protein_coding	0.453927	7.75907	3.05655	0.00368427	0.507327
Mrpl57	14	57826234	57829297	+	Mrpl57	protein_coding	-0.249705	4.4079	-3.05336	0.00371697	0.507327
Srcin1	11	97509340	97576187	-	Srcin1	protein_coding	0.294813	8.47199	3.05231	0.00372787	0.507327
Mpp2	11	102057015	102088516	-	Mpp2	protein_coding	0.299358	7.66924	3.04834	0.00376908	0.507327
Ankrd16	2	11777876	11790330	+	Ankrd16	protein_coding	0.247344	3.77189	3.04327	0.0038224	0.507327
Elfn2	15	78667331	78718772	-	Elfn2	protein_coding	0.448962	6.80296	3.04128	0.0038436	0.507327
Syt7	19	10389090	10453182	+	Syt7	protein_coding	0.324815	8.4904	3.04052	0.00385164	0.507327
Chst1	2	92599707	92615251	+	Chst1	protein_coding	0.211688	8.45795	3.03916	0.00386622	0.507327
Muc2	7	141690340	141754694	+	Muc2	protein_coding	0.160179	0.320809	3.03881	0.00386997	0.507327
Dennd1a	2	37798991	38287391	-	Dennd1a	protein_coding	0.314924	5.83284	3.0341	0.00392068	0.507327
Zfp46	4	136284683	136293943	+	Zfp46	protein_coding	0.325356	5.83278	3.02516	0.00401871	0.507327
Wnk2	13	49036303	49148015	-	Wnk2	protein_coding	0.451068	6.30105	3.02474	0.00402337	0.507327
Camta2	11	70669463	70688106	-	Camta2	protein_coding	0.505514	7.43665	3.02207	0.00405317	0.507327
Adgrf2	17	42708936	42742180	-	Adgrf2	protein_coding	0.250785	0.942366	3.01465	0.00413702	0.507327
Cited4	4	120666572	120667821	+	Cited4	protein_coding	0.430751	2.69305	3.00912	0.00420054	0.507327
Dlgap4	2	156613705	156764364	+	Dlgap4	protein_coding	0.329158	7.71003	3.00805	0.00421289	0.507327
Ltbp4	7	27305136	27337693	-	Ltbp4	protein_coding	0.510689	4.45621	2.9999	0.00430835	0.507327
Kcnh4	11	100740376	100759943	-	Kcnh4	protein_coding	0.563575	4.4269	2.99881	0.00432127	0.507327
Pitpnm3	11	72047528	72135779	-	Pitpnm3	protein_coding	0.434793	6.92186	2.99476	0.00436969	0.507327
Pik3cd	4	149649168	149702572	-	Pik3cd	protein_coding	0.33069	4.48735	2.99225	0.00439989	0.507327
Lzts1	8	69132669	69184226	-	Lzts1	protein_coding	0.315098	5.83814	2.99198	0.00440309	0.507327
Tceal1	X	136707982	136711479	+	Tceal1	protein_coding	-0.273047	5.25625	-2.98662	0.00446833	0.507327
Sorcs2	5	36017180	36398140	-	Sorcs2	protein_coding	0.340928	5.78242	2.98599	0.00447615	0.507327
Dot1l	10	80755206	80795462	+	Dot1l	protein_coding	0.505625	5.30277	2.98151	0.00453143	0.507327
Mapk4	18	73928486	74065360	-	Mapk4	protein_coding	0.241401	6.81555	2.98015	0.00454833	0.507327
Slc39a3	10	81028538	81037427	-	Slc39a3	protein_coding	0.214334	6.2983	2.96426	0.00475034	0.507327
Obsl1	1	75479310	75506453	-	Obsl1	protein_coding	0.310272	3.3717	2.96059	0.0047982	0.507327
Kmt2b	7	30568858	30588727	-	Kmt2b	protein_coding	0.520269	5.22764	2.95825	0.00482894	0.507327
Tmem94	11	115765433	115799367	+	Tmem94	protein_coding	0.372775	5.63062	2.95523	0.00486892	0.507327
Fbf1	11	116142285	116168167	-	Fbf1	protein_coding	0.301117	5.78253	2.95307	0.00489763	0.507327
Slc8a2	7	16129826	16161064	+	Slc8a2	protein_coding	0.294914	8.45363	2.95082	0.00492782	0.507327
Ppard	17	28232700	28301475	+	Ppard	protein_coding	0.403275	4.76899	2.94657	0.00498509	0.507327
Slc12a9	5	137314558	137333598	-	Slc12a9	protein_coding	0.287054	4.52926	2.94311	0.00503225	0.507327
Pacsin1	17	27655509	27711483	+	Pacsin1	protein_coding	0.383974	8.6866	2.93869	0.00509316	0.507327
1700034H15Rik	1	191886130	191907528	-	1700034H15Rik	antisense	0.376249	2.39228	2.93849	0.00509588	0.507327
Fam193a	5	34369933	34486457	+	Fam193a	protein_coding	0.331146	5.53482	2.93168	0.0051911	0.507327
Slc30a3	5	31086106	31108238	-	Slc30a3	protein_coding	0.360543	6.39377	2.92855	0.00523537	0.507327
Icam5	9	21032073	21039037	+	Icam5	protein_coding	0.291175	6.76319	2.92781	0.00524594	0.507327
Pcdhga12	18	37765580	37841874	+	Pcdhga12	protein_coding	0.308099	5.21216	2.92538	0.00528055	0.507327
Ptpn23	9	110385082	110408214	-	Ptpn23	protein_coding	0.44722	5.59046	2.91975	0.00536188	0.507327
Kmt2d	15	98831669	98871205	-	Kmt2d	protein_coding	0.509763	6.15505	2.91698	0.00540223	0.507327
Hhipl1	12	108306270	108330870	+	Hhipl1	protein_coding	0.323321	2.80215	2.90983	0.00550774	0.507327
Adgrb1	15	74516195	74589466	+	Adgrb1	protein_coding	0.449783	7.71273	2.90976	0.00550882	0.507327
Map3k3	11	106084613	106155447	+	Map3k3	protein_coding	0.253224	4.53644	2.90414	0.00559304	0.507327
Cul9	17	46500572	46546389	-	Cul9	protein_coding	0.43154	5.41506	2.90166	0.00563072	0.507327
Tmem63b	17	45660171	45686906	-	Tmem63b	protein_coding	0.207386	6.57389	2.9008	0.0056437	0.507327
Cpsf4l	11	113698172	113710018	-	Cpsf4l	protein_coding	0.168403	0.462393	2.89995	0.00565678	0.507327
Fam163b	2	27110380	27142492	-	Fam163b	protein_coding	0.37271	8.03479	2.89742	0.00569556	0.507327
Sptbn4	7	27356383	27447687	-	Sptbn4	protein_coding	0.409257	6.48001	2.89466	0.00573798	0.507327
Sympk	7	19024377	19054619	+	Sympk	protein_coding	0.278394	6.12678	2.88968	0.00581561	0.507327
Ablim2	5	35757880	35884974	+	Ablim2	protein_coding	0.243879	7.30523	2.88936	0.00582063	0.507327
Sarnp	10	128817333	128877630	+	Sarnp	protein_coding	-0.259392	2.58068	-2.88763	0.00584784	0.507327
Kifc5b	17	26917091	26932580	+	Kifc5b	protein_coding	0.315814	1.42418	2.88687	0.00585974	0.507327
Abhd3	18	10644411	10706772	-	Abhd3	protein_coding	-0.240226	5.78919	-2.88395	0.00590609	0.507327
Snhg6	1	9941959	9944119	-	Snhg6	lincRNA	-0.387487	2.208	-2.87784	0.00600388	0.507327
Flywch1	17	23752793	23771603	-	Flywch1	protein_coding	0.220695	7.85322	2.87725	0.00601337	0.507327
Slc7a8	14	54722209	54781947	-	Slc7a8	protein_coding	0.360761	6.60759	2.87387	0.00606826	0.507327
Adam11	11	102761439	102780263	+	Adam11	protein_coding	0.289433	6.78565	2.87317	0.00607972	0.507327
Mrpl51	6	125191801	125196270	+	Mrpl51	protein_coding	-0.202983	4.82099	-2.87299	0.00608269	0.507327
Baiap2	11	119942763	120006783	+	Baiap2	protein_coding	0.203062	8.18138	2.87234	0.00609329	0.507327
Slc4a3	1	75546266	75562173	+	Slc4a3	protein_coding	0.327698	6.45338	2.87198	0.00609913	0.507327
Ube3b	5	114380607	114421170	+	Ube3b	protein_coding	0.330789	6.92159	2.87129	0.00611049	0.507327
Rps15a-ps6	11	6172644	6173037	-	Rps15a-ps6	processed_pseudogene	-0.323358	4.39417	-2.8699	0.00613326	0.507327
Sarm1	11	78472330	78497755	-	Sarm1	protein_coding	0.321882	4.94381	2.86435	0.00622526	0.507327
Kcnj11	7	46093953	46100765	-	Kcnj11	protein_coding	0.263273	6.11128	2.86116	0.00627883	0.507327
Ebf3	7	137193673	137314446	-	Ebf3	protein_coding	-0.319055	1.07863	-2.8597	0.0063033	0.507327
Apc2	10	80295977	80318264	+	Apc2	protein_coding	0.504986	6.82903	2.85967	0.00630393	0.507327
Ndufb2	6	39592574	39603383	+	Ndufb2	protein_coding	-0.313191	4.41779	-2.85855	0.00632283	0.507327
Amer3	1	34579657	34590945	+	Amer3	protein_coding	0.173351	5.75881	2.85658	0.00635628	0.507327
Bahcc1	11	120232947	120292297	+	Bahcc1	protein_coding	0.497649	3.98304	2.8565	0.00635766	0.507327
Trp53i11	2	93187548	93201760	+	Trp53i11	protein_coding	0.345224	6.24046	2.85429	0.0063953	0.507327
Tmem70	1	16665207	16678276	+	Tmem70	protein_coding	-0.226032	5.53262	-2.85196	0.00643538	0.507327
Cyp46a1	12	108334381	108362235	+	Cyp46a1	protein_coding	0.310539	7.36385	2.85154	0.00644264	0.507327
Kcnk9	15	72501089	72546341	-	Kcnk9	protein_coding	0.460339	4.68733	2.85109	0.00645024	0.507327
Otud7a	7	63444751	63759029	+	Otud7a	protein_coding	0.387542	4.87344	2.84651	0.00652979	0.507327
Sccpdh	1	179668210	179687190	+	Sccpdh	protein_coding	-0.195067	6.06801	-2.84601	0.00653847	0.507327
Ube2d2a	18	35771559	35807173	+	Ube2d2a	protein_coding	-0.180196	6.94481	-2.84556	0.00654634	0.507327
Paxip1	5	27740080	27791692	-	Paxip1	protein_coding	0.147203	5.36812	2.83532	0.00672779	0.507327
Ambra1	2	91730134	91918850	+	Ambra1	protein_coding	0.204299	6.25876	2.83461	0.00674042	0.507327
Prkar1b	5	139017306	139150002	-	Prkar1b	protein_coding	0.188844	9.69156	2.83248	0.0067788	0.507327
Cebpzos	17	78916500	78920307	+	Cebpzos	protein_coding	-0.354668	3.79444	-2.83188	0.00678968	0.507327
Speg	1	75375297	75432321	+	Speg	protein_coding	0.308626	6.55967	2.83124	0.00680127	0.507327
Commd6	14	101632981	101640687	-	Commd6	protein_coding	-0.240567	4.64855	-2.82868	0.0068478	0.507327
2010300C02Rik	1	37611677	37720086	-	2010300C02Rik	protein_coding	0.299494	8.23553	2.82723	0.00687429	0.507327
Nckap5l	15	99422035	99457749	-	Nckap5l	protein_coding	0.604803	3.79248	2.8271	0.00687672	0.507327
Pdcd11	19	47090766	47131144	+	Pdcd11	protein_coding	0.398476	4.34372	2.82524	0.0069108	0.507327
Cacnb3	15	98630840	98644530	+	Cacnb3	protein_coding	0.227243	7.93829	2.82247	0.00696198	0.507327
Osbpl10	9	114978569	115232226	+	Osbpl10	protein_coding	0.298441	4.47221	2.82194	0.0069718	0.507327
Radil	5	142484839	142551099	-	Radil	protein_coding	0.395611	3.23962	2.81673	0.00706895	0.507327
Tmem132a	19	10857822	10869941	-	Tmem132a	protein_coding	0.339254	7.68773	2.81462	0.0071087	0.507327
Fbxl19	7	127744543	127769484	+	Fbxl19	protein_coding	0.311164	5.48905	2.81416	0.00711751	0.507327
Zfp512b	2	181582103	181592804	-	Zfp512b	protein_coding	0.311821	6.20845	2.81361	0.0071279	0.507327
Rhobtb2	14	69784990	69805637	-	Rhobtb2	protein_coding	0.192397	7.28731	2.81331	0.00713348	0.507327
Runx2	17	44495987	44814798	-	Runx2	protein_coding	0.338012	3.66514	2.8127	0.00714508	0.507327
Pcdh1	18	38185914	38212054	-	Pcdh1	protein_coding	0.544371	6.44902	2.8115	0.00716777	0.507327
Arid1b	17	4994332	5347657	+	Arid1b	protein_coding	0.18126	6.5009	2.80958	0.00720453	0.507327
Gys1	7	45434844	45456620	+	Gys1	protein_coding	0.223205	4.43391	2.80916	0.0072125	0.507327
Fbxl20	11	98082556	98150404	-	Fbxl20	protein_coding	0.257851	6.26915	2.80884	0.00721869	0.507327
Dph3	14	32080566	32085730	-	Dph3	protein_coding	-0.229057	5.52481	-2.80884	0.00721869	0.507327
Pitpnm1	19	4099998	4113966	+	Pitpnm1	protein_coding	0.331738	6.81893	2.80694	0.00725505	0.507327
Akap8	17	32303676	32321154	-	Akap8	protein_coding	0.193649	6.53841	2.80652	0.0072631	0.507327
Naa40	19	7225668	7241223	-	Naa40	protein_coding	0.306721	5.25363	2.80585	0.00727612	0.507327
Tecpr1	5	144194442	144223616	-	Tecpr1	protein_coding	0.254326	6.28583	2.80585	0.00727615	0.507327
Pprc1	19	46044886	46072916	+	Pprc1	protein_coding	0.341325	4.5471	2.80542	0.00728449	0.507327
Jph3	8	121729623	121794277	+	Jph3	protein_coding	0.261478	7.8264	2.80526	0.00728739	0.507327
Smim15	13	108044446	108049173	+	Smim15	protein_coding	-0.26957	5.77885	-2.80442	0.00730374	0.507327
Hs6st1	1	36068400	36106447	+	Hs6st1	protein_coding	0.241059	6.32628	2.80378	0.00731615	0.507327
Clip2	5	134489383	134552435	-	Clip2	protein_coding	0.313725	6.9116	2.80032	0.00738354	0.507327
Cux2	5	121856366	122050103	-	Cux2	protein_coding	0.438553	6.03221	2.79935	0.00740251	0.507327
Clasp1	1	118389058	118612679	+	Clasp1	protein_coding	0.251314	6.86187	2.79927	0.00740412	0.507327
Mlf1	3	67374097	67400004	+	Mlf1	protein_coding	-0.256441	0.924671	-2.79451	0.0074979	0.507327
4931428F04Rik	8	105280409	105289865	-	4931428F04Rik	protein_coding	0.287466	4.68948	2.79396	0.00750886	0.507327
Cx3cl1	8	94772009	94782428	+	Cx3cl1	protein_coding	0.254541	9.8905	2.79085	0.00757081	0.507327
Crtc1	8	70382355	70439580	-	Crtc1	protein_coding	0.42728	7.74109	2.78987	0.00759043	0.507327
Araf	X	20797814	20860520	+	Araf	protein_coding	-0.190373	6.97546	-2.78734	0.0076413	0.507327
Cep170b	12	112720455	112746593	+	Cep170b	protein_coding	0.386337	7.22021	2.78626	0.00766328	0.507327
Dlgap2	8	14095865	14847681	+	Dlgap2	protein_coding	0.436382	5.78242	2.78581	0.00767222	0.507327
Kdm4b	17	56326062	56402871	+	Kdm4b	protein_coding	0.30378	5.64252	2.78445	0.0077	0.507327
Srebf2	15	82147181	82205380	+	Srebf2	protein_coding	0.238186	7.4182	2.78221	0.00774554	0.507327
Tnks1bp1	2	85048022	85073049	+	Tnks1bp1	protein_coding	0.386868	6.15185	2.78214	0.00774698	0.507327
Tob2	15	81848272	81858797	-	Tob2	protein_coding	0.225281	5.03016	2.78119	0.00776648	0.507327
Ccdc159	9	21927471	21935873	+	Ccdc159	protein_coding	0.29954	2.41894	2.77883	0.00781485	0.507327
Cldn34c1	X	123103495	123188796	+	Cldn34c1	protein_coding	-0.199904	1.41904	-2.77634	0.00786644	0.507327
Syngap1	17	26941253	26972435	+	Syngap1	protein_coding	0.510896	7.59142	2.77541	0.00788573	0.507327
Ap2a1	7	44900373	44929497	-	Ap2a1	protein_coding	0.346339	6.68375	2.7744	0.00790666	0.507327
Rpl27a	7	109519147	109522368	+	Rpl27a	protein_coding	-0.283018	6.31274	-2.77424	0.0079101	0.507327
Paics	5	76951307	76967510	+	Paics	protein_coding	-0.175294	6.65086	-2.77342	0.00792706	0.507327
Rnf157	11	116336353	116413033	-	Rnf157	protein_coding	0.253397	8.46327	2.77222	0.00795217	0.507327
2410021H03Rik	17	69275362	69277209	-	2410021H03Rik	antisense	0.182667	0.551912	2.77216	0.0079536	0.507327
Slit1	19	41600257	41743666	-	Slit1	protein_coding	0.379305	4.7083	2.76636	0.00807582	0.507327
S100b	10	76253853	76261160	+	S100b	protein_coding	-0.246984	7.97382	-2.75918	0.00822975	0.507327
Edc4	8	105880881	105894909	+	Edc4	protein_coding	0.211269	5.71792	2.75798	0.0082557	0.507327
Nos3	5	24364810	24384475	+	Nos3	protein_coding	0.339841	2.63536	2.75362	0.00835069	0.507327
Mss51	14	20482867	20496902	-	Mss51	protein_coding	0.143063	0.510401	2.75264	0.00837225	0.507327
Lum	10	97565128	97572704	+	Lum	protein_coding	-0.362921	1.6037	-2.75194	0.00838752	0.507327
Igfn1	1	135953578	136006343	-	Igfn1	protein_coding	0.670676	4.8553	2.75173	0.00839214	0.507327
Git1	11	77493562	77507787	+	Git1	protein_coding	0.340674	8.21107	2.75127	0.00840231	0.507327
Atg2a	19	6241668	6262336	+	Atg2a	protein_coding	0.345478	5.21043	2.75038	0.00842201	0.507327
Axin2	11	108920349	108950784	+	Axin2	protein_coding	0.261811	4.67873	2.74862	0.00846092	0.507327
Rps14	18	60774510	60778547	+	Rps14	protein_coding	-0.364657	4.95769	-2.74693	0.00849856	0.507327
Osbpl7	11	97050628	97068905	+	Osbpl7	protein_coding	0.359083	3.76848	2.74527	0.00853561	0.507327
Leng8	7	4137039	4148178	+	Leng8	protein_coding	0.500227	7.2893	2.74451	0.00855247	0.507327
Ube2o	11	116537740	116581448	-	Ube2o	protein_coding	0.256117	7.1038	2.74199	0.00860905	0.507327
Gcn1l1	5	115565254	115622655	+	Gcn1l1	protein_coding	0.347324	5.43108	2.74122	0.00862654	0.507327
Mrpl17	7	105803206	105811100	-	Mrpl17	protein_coding	-0.256084	4.95847	-2.73878	0.00868184	0.507327
Sema4b	7	80186841	80226528	+	Sema4b	protein_coding	0.250514	4.0069	2.73842	0.0086899	0.507327
Slit3	11	35121224	35708508	+	Slit3	protein_coding	0.400429	3.84074	2.73323	0.00880854	0.507327
Pcnx2	8	125751508	125898318	-	Pcnx2	protein_coding	0.305477	6.47585	2.73293	0.00881559	0.507327
Yeats2	16	20141063	20232574	+	Yeats2	protein_coding	0.298865	4.86591	2.73247	0.00882604	0.507327
2810001G20Rik	11	64079484	64083260	+	2810001G20Rik	antisense	-0.321049	3.37361	-2.72975	0.00888896	0.507327
Rtn4rl2	2	84871924	84886711	-	Rtn4rl2	protein_coding	0.537069	3.66446	2.72915	0.00890303	0.507327
Cbx4	11	119077573	119086222	-	Cbx4	protein_coding	0.22995	5.31806	2.72904	0.00890556	0.507327
Atg9a	1	75180860	75192197	-	Atg9a	protein_coding	0.331586	7.06982	2.72881	0.00891093	0.507327
Adgrl1	8	83900105	83941955	+	Adgrl1	protein_coding	0.254828	9.41352	2.72814	0.00892652	0.507327
Mthfr	4	148039077	148059552	+	Mthfr	protein_coding	0.302461	4.91175	2.72776	0.00893528	0.507327
Prdm11	2	92965151	93046168	-	Prdm11	protein_coding	0.261564	2.42865	2.72734	0.00894507	0.507327
Cacna1i	15	80287238	80398280	+	Cacna1i	protein_coding	0.359882	6.6864	2.72669	0.0089604	0.507327
Atp13a1	8	69791163	69807750	+	Atp13a1	protein_coding	0.216548	5.05407	2.72623	0.00897108	0.507327
Grm2	9	106643095	106656083	-	Grm2	protein_coding	0.435282	5.26158	2.72387	0.00902652	0.507327
Celsr3	9	108826320	108852970	+	Celsr3	protein_coding	0.553305	6.43239	2.72132	0.00908662	0.507327
Vps35	8	85260392	85299803	-	Vps35	protein_coding	-0.177709	7.751	-2.72093	0.0090959	0.507327
Cd63	10	128900989	128912823	+	Cd63	protein_coding	-0.282434	4.41778	-2.71866	0.00914991	0.507327
Ly86	13	37345208	37419037	+	Ly86	protein_coding	-0.345737	3.99801	-2.71866	0.00914994	0.507327
Lama5	2	180176373	180225860	-	Lama5	protein_coding	0.414922	2.68155	2.71811	0.00916301	0.507327
Prorsd1	11	29511757	29515034	-	Prorsd1	protein_coding	-0.407121	2.21398	-2.71811	0.00916308	0.507327
Rap1gap2	11	74383356	74610916	-	Rap1gap2	protein_coding	0.26799	7.95328	2.71724	0.00918377	0.507327
Wscd2	5	113490333	113589726	+	Wscd2	protein_coding	0.292217	5.56169	2.7168	0.00919434	0.507327
Sdk1	5	141241490	142215587	+	Sdk1	protein_coding	0.414536	2.95561	2.715	0.00923747	0.507327
Pdzd3	9	44247307	44251472	-	Pdzd3	protein_coding	0.23017	0.54604	2.71107	0.00933242	0.507327
Zfp865	7	5020376	5036769	+	Zfp865	protein_coding	0.382844	4.0708	2.71029	0.00935142	0.507327
Tekt1	11	72344722	72362443	-	Tekt1	protein_coding	-0.260922	1.27377	-2.70987	0.00936175	0.507327
Mapk8ip2	15	89453913	89464469	+	Mapk8ip2	protein_coding	0.19166	8.10814	2.70973	0.00936499	0.507327
Srcap	7	127511983	127561220	+	Srcap	protein_coding	0.41702	6.7872	2.70929	0.00937587	0.507327
Pld2	11	70540064	70558111	+	Pld2	protein_coding	0.237644	3.98802	2.70728	0.00942494	0.507327
Abcc8	7	46104523	46180034	-	Abcc8	protein_coding	0.502814	4.23029	2.70491	0.00948318	0.507327
Lmtk3	7	45783738	45804145	+	Lmtk3	protein_coding	0.566607	6.44977	2.70429	0.00949839	0.507327
Rcor2	19	7267325	7275226	+	Rcor2	protein_coding	0.293927	3.33003	2.70198	0.00955556	0.507327
Fbxo41	6	85469574	85502995	-	Fbxo41	protein_coding	0.366967	7.06461	2.70189	0.00955772	0.507327
Rida	15	34484021	34495256	-	Rida	protein_coding	-0.335579	5.14019	-2.70033	0.00959648	0.507327
Dld	12	31331277	31351454	-	Dld	protein_coding	-0.223377	7.08038	-2.70014	0.00960134	0.507327
Coro7	16	4626133	4679778	-	Coro7	protein_coding	0.280869	5.40029	2.69994	0.00960625	0.507327
Mov10	3	104794836	104818564	-	Mov10	protein_coding	0.38175	2.4348	2.69937	0.00962039	0.507327
Lyz2	10	117277331	117282322	-	Lyz2	protein_coding	-0.467971	3.26957	-2.69852	0.0096418	0.507327
Adamts9	6	92772699	92943493	-	Adamts9	protein_coding	-0.272798	1.59361	-2.69822	0.00964913	0.507327
Slc41a1	1	131827493	131848866	+	Slc41a1	protein_coding	0.252964	6.43694	2.69815	0.00965096	0.507327
Gtpbp2	17	46161032	46169371	+	Gtpbp2	protein_coding	0.243661	5.60091	2.69534	0.00972154	0.507327
Gpx2-ps1	7	100264675	100265246	+	Gpx2-ps1	processed_pseudogene	0.185565	0.480047	2.69277	0.00978663	0.507327
Ldlrad4	18	67933257	68255550	+	Ldlrad4	protein_coding	0.2038	5.28914	2.69249	0.00979357	0.507327
Eef1e1	13	38644207	38659059	-	Eef1e1	protein_coding	-0.238854	4.58416	-2.69144	0.00982043	0.507327
Bcl9l	9	44482825	44511897	+	Bcl9l	protein_coding	0.561591	5.10133	2.69063	0.00984091	0.507327
Yipf4	17	74489493	74500278	+	Yipf4	protein_coding	-0.204873	5.54166	-2.68967	0.00986546	0.507327
Scap	9	110333288	110384951	+	Scap	protein_coding	0.214912	6.23419	2.68838	0.00989854	0.507327
A230001M10Rik	3	102262405	102445133	+	A230001M10Rik	lincRNA	-0.330996	2.41554	-2.68739	0.00992396	0.507327
Gm10012	17	25901856	25902228	+	Gm10012	transcribed_processed_pseudogene	-0.376383	4.37361	-2.68736	0.00992462	0.507327
Fundc1	X	17556564	17572326	-	Fundc1	protein_coding	-0.260951	5.81715	-2.68425	0.0100049	0.507327
Mcts2	2	152687035	152687947	+	Mcts2	protein_coding	-0.360369	3.46373	-2.68162	0.010073	0.507327
Sec16a	2	26409431	26445217	-	Sec16a	protein_coding	0.270782	5.74026	2.68117	0.0100848	0.507327
Phgdh	3	98313170	98339991	-	Phgdh	protein_coding	-0.239679	4.0531	-2.67705	0.0101928	0.507327
Plekha5	6	140424054	140597111	+	Plekha5	protein_coding	0.288609	5.20709	2.67673	0.0102011	0.507327
Rere	4	150281646	150621967	+	Rere	protein_coding	0.315091	7.00143	2.67588	0.0102236	0.507327
Glis2	16	4594713	4624925	+	Glis2	protein_coding	0.361282	3.58413	2.67537	0.0102372	0.507327
Slc12a5	2	164960802	164999732	+	Slc12a5	protein_coding	0.2604	8.9566	2.67461	0.0102571	0.507327
Sec14l1	11	117115168	117159269	+	Sec14l1	protein_coding	0.199003	8.13526	2.67456	0.0102585	0.507327
Ptpn14	1	189728268	189876696	+	Ptpn14	protein_coding	0.50401	3.01401	2.67421	0.0102678	0.507327
Rps3a1	3	86137940	86142703	-	Rps3a1	protein_coding	-0.305535	6.37557	-2.6736	0.0102839	0.507327
Rnf7	9	96470937	96478676	-	Rnf7	protein_coding	-0.266858	6.30047	-2.67342	0.0102888	0.507327
Ube2a	X	36873900	36884223	+	Ube2a	protein_coding	-0.234607	5.42173	-2.67243	0.0103151	0.507327
S100a16	3	90537254	90543152	+	S100a16	protein_coding	-0.299206	6.09504	-2.66912	0.0104033	0.507327
Nap1l5	6	58905233	58907077	-	Nap1l5	protein_coding	-0.179129	8.88336	-2.66789	0.0104364	0.507327
Dag1	9	108204634	108263959	-	Dag1	protein_coding	0.196521	6.96676	2.66503	0.0105137	0.507327
Fbxl16	17	25809085	25821245	+	Fbxl16	protein_coding	0.287509	10.2938	2.66365	0.0105513	0.507327
Col4a1	8	11198423	11312827	-	Col4a1	protein_coding	0.330728	4.68295	2.66322	0.0105628	0.507327
Ankrd34a	3	96596636	96599776	+	Ankrd34a	protein_coding	0.269127	6.26385	2.66234	0.0105867	0.507327
Abcc1	16	14361558	14475738	+	Abcc1	protein_coding	0.298886	4.47915	2.66161	0.0106066	0.507327
Zswim1	2	164822686	164826872	+	Zswim1	protein_coding	0.175467	5.02933	2.6611	0.0106207	0.507327
Cic	7	25267704	25294160	+	Cic	protein_coding	0.489168	6.91995	2.66058	0.0106348	0.507327
Anks6	4	47015669	47057428	-	Anks6	protein_coding	0.313991	3.29619	2.65898	0.0106787	0.507327
Spata31d1d	13	59725925	59731753	-	Spata31d1d	protein_coding	0.100184	0.1504	2.65889	0.0106811	0.507327
Clstn3	6	124430759	124464795	-	Clstn3	protein_coding	0.193076	8.36967	2.65815	0.0107015	0.507327
Arhgef17	7	100869752	100932108	-	Arhgef17	protein_coding	0.246774	7.83631	2.65375	0.0108232	0.507327
Bsn	9	108096022	108190385	-	Bsn	protein_coding	0.45184	8.77748	2.65184	0.0108766	0.507327
Hexb	13	97176331	97198358	-	Hexb	protein_coding	-0.219367	6.41353	-2.64936	0.0109461	0.507327
Eef2k	7	120842831	120907451	+	Eef2k	protein_coding	0.218596	5.22077	2.6466	0.0110238	0.507327
Hspa1a	17	34969190	34972157	-	Hspa1a	protein_coding	0.279401	3.42529	2.64629	0.0110326	0.507327
Inpp5j	11	3494375	3504822	-	Inpp5j	protein_coding	0.293661	5.71807	2.64563	0.0110513	0.507327
Spaca6	17	17827158	17843010	+	Spaca6	protein_coding	0.256552	2.6883	2.64445	0.011085	0.507327
Camk2a	18	60925618	60988153	+	Camk2a	protein_coding	0.291169	11.9442	2.64379	0.0111036	0.507327
Dnm2	9	21424908	21507760	+	Dnm2	protein_coding	0.279461	4.76924	2.6436	0.0111091	0.507327
Dgkz	2	91932824	91975865	-	Dgkz	protein_coding	0.322001	8.26448	2.64179	0.0111608	0.507327
AU040972	11	79481719	79484032	-	AU040972	antisense	0.18336	0.518269	2.64177	0.0111611	0.507327
Lrp3	7	35200027	35215499	-	Lrp3	protein_coding	0.291254	6.15057	2.64088	0.0111868	0.507327
Tacr2	10	62252438	62265991	+	Tacr2	protein_coding	0.187036	0.363036	2.64054	0.0111965	0.507327
Jakmip1	5	37028335	37150608	+	Jakmip1	protein_coding	0.202665	5.90922	2.64005	0.0112106	0.507327
Trim46	3	89234177	89246310	-	Trim46	protein_coding	0.321375	6.17399	2.6389	0.0112437	0.507327
Gon4l	3	88835231	88910104	+	Gon4l	protein_coding	0.252443	5.94458	2.63698	0.011299	0.507327
Arhgap33	7	30522226	30535061	-	Arhgap33	protein_coding	0.499376	7.00731	2.63681	0.011304	0.507327
Usp36	11	118259651	118290245	-	Usp36	protein_coding	0.356094	4.96251	2.63593	0.0113295	0.507327
Smg6	11	74925823	75164449	+	Smg6	protein_coding	0.336504	5.62699	2.63557	0.0113401	0.507327
Mast1	8	84911903	84937360	-	Mast1	protein_coding	0.371005	6.09552	2.63517	0.0113515	0.507327
Atp1a3	7	24978167	25005959	-	Atp1a3	protein_coding	0.304301	10.2672	2.63474	0.0113639	0.507327
Crocc	4	141016637	141060551	-	Crocc	protein_coding	0.471688	4.12373	2.63469	0.0113655	0.507327
Inpp4a	1	37299865	37410737	+	Inpp4a	protein_coding	0.182596	7.36532	2.63371	0.0113939	0.507327
Zfp646	7	127876221	127885997	+	Zfp646	protein_coding	0.271151	5.17486	2.63254	0.0114283	0.507327
Scaf1	7	45002948	45016364	-	Scaf1	protein_coding	0.40048	6.72817	2.63171	0.0114524	0.507327
Prrt2	7	127017531	127021212	-	Prrt2	protein_coding	0.219279	8.51906	2.63155	0.0114573	0.507327
Adgra1	7	139834174	139878089	+	Adgra1	protein_coding	0.213988	6.4649	2.62914	0.011528	0.507327
B3gat1	9	26733728	26763102	+	B3gat1	protein_coding	0.208266	7.95538	2.62724	0.0115841	0.507327
Rgp1	4	43578715	43587488	+	Rgp1	protein_coding	0.258318	5.83917	2.62426	0.0116727	0.507327
Sumo1	1	59586558	59670835	-	Sumo1	protein_coding	-0.238301	6.02858	-2.62382	0.0116857	0.507327
2310010J17Rik	7	90124822	90129985	-	2310010J17Rik	bidirectional_promoter_lncRNA	-0.152471	1.00682	-2.62087	0.0117742	0.507327
Cacybp	1	160202367	160212876	-	Cacybp	protein_coding	-0.247956	6.28665	-2.61998	0.011801	0.507327
Mapk8ip3	17	24892153	24936978	-	Mapk8ip3	protein_coding	0.258526	8.13499	2.61857	0.0118434	0.507327
Rhbdf1	11	32209585	32222301	-	Rhbdf1	protein_coding	0.346632	2.85302	2.61617	0.0119162	0.507327
Pak6	2	118663303	118698021	+	Pak6	protein_coding	0.317998	6.04821	2.61582	0.0119269	0.507327
Cnnm3	1	36511867	36528238	+	Cnnm3	protein_coding	0.27434	4.9301	2.61543	0.0119385	0.507327
Pnpla6	8	3515384	3544268	+	Pnpla6	protein_coding	0.284945	4.76728	2.6145	0.011967	0.507327
Mgrn1	16	4886249	4938297	+	Mgrn1	protein_coding	0.180037	7.36163	2.61432	0.0119724	0.507327
Rpl31-ps12	16	16819749	16820124	-	Rpl31-ps12	processed_pseudogene	-0.305331	4.99605	-2.61189	0.0120467	0.507327
4930444F02Rik	10	18796806	18831931	-	4930444F02Rik	lincRNA	0.115887	0.333217	2.61143	0.0120608	0.507327
Ulk1	5	110784488	110810098	-	Ulk1	protein_coding	0.175551	6.51957	2.60886	0.0121402	0.507327
Proser1	3	53463666	53481756	+	Proser1	protein_coding	0.286207	4.53514	2.60826	0.0121585	0.507327
Nomo1	7	46033698	46084213	+	Nomo1	protein_coding	0.131244	6.6659	2.60769	0.0121764	0.507327
Scrt2	2	152081529	152095803	+	Scrt2	protein_coding	0.342204	4.48455	2.60612	0.0122249	0.507327
Pspn	17	56999457	57000019	-	Pspn	protein_coding	0.134044	0.284399	2.60491	0.0122626	0.507327
Numbl	7	27258433	27282145	+	Numbl	protein_coding	0.304395	6.24521	2.60396	0.0122924	0.507327
Sh2d7	9	54538984	54545021	+	Sh2d7	protein_coding	-0.122565	1.74689	-2.60275	0.0123303	0.507327
Med24	11	98704591	98729436	-	Med24	protein_coding	0.262679	6.15429	2.60272	0.0123312	0.507327
Cldn20	17	3532554	3533214	+	Cldn20	protein_coding	0.206017	0.460136	2.60239	0.0123414	0.507327
Cul4b	X	38533274	38576197	-	Cul4b	protein_coding	-0.218291	5.59337	-2.60226	0.0123457	0.507327
Fbxo21	5	117976730	118010202	+	Fbxo21	protein_coding	0.181263	6.98857	2.60092	0.0123878	0.507327
Urb1	16	90751527	90810414	-	Urb1	protein_coding	0.357008	3.66183	2.60046	0.0124023	0.507327
Zbtb45	7	13003898	13010035	-	Zbtb45	protein_coding	0.288796	4.38616	2.60018	0.012411	0.507327
Pdgfb	15	79995874	80014978	-	Pdgfb	protein_coding	0.269214	4.68439	2.59853	0.0124632	0.507327
Nacc1	8	84670483	84687863	-	Nacc1	protein_coding	0.223577	7.2467	2.59761	0.0124923	0.507327
Lat2	5	134600022	134615026	-	Lat2	protein_coding	-0.204411	1.56972	-2.59703	0.0125108	0.507327
43717	11	117199661	117362326	+	43717	protein_coding	0.189952	5.82733	2.59668	0.012522	0.507327
Rimbp2	5	128757791	128953487	-	Rimbp2	protein_coding	0.32348	7.60909	2.59619	0.0125375	0.507327
Twf1	15	94577951	94589890	-	Twf1	protein_coding	-0.128847	5.99643	-2.59533	0.0125649	0.507327
Rtn4r	16	18127642	18152409	+	Rtn4r	protein_coding	0.414439	6.43591	2.59476	0.012583	0.507327
Arpc5l	2	39005348	39015878	+	Arpc5l	protein_coding	-0.192969	6.64755	-2.59307	0.0126369	0.507327
Nisch	14	31170930	31216947	-	Nisch	protein_coding	0.248672	8.31144	2.59272	0.0126484	0.507327
Morc2a	11	3649494	3690478	+	Morc2a	protein_coding	0.17675	5.643	2.59234	0.0126605	0.507327
Dvl3	16	20516982	20534011	+	Dvl3	protein_coding	0.423206	5.0019	2.5913	0.012694	0.507327
Erh	12	80634022	80644342	-	Erh	protein_coding	-0.273438	4.49087	-2.59107	0.0127014	0.507327
Gbf1	19	46152509	46286511	+	Gbf1	protein_coding	0.317249	6.19115	2.59076	0.0127114	0.507327
Shisa7	7	4825552	4844697	-	Shisa7	protein_coding	0.428574	7.79916	2.58991	0.0127386	0.507327
Gdpd5	7	99381414	99461878	+	Gdpd5	protein_coding	0.310727	4.66344	2.58841	0.0127872	0.507327
Ssh1	5	113937094	113993895	-	Ssh1	protein_coding	0.280384	3.68608	2.58556	0.0128798	0.507327
Cdkn1b	6	134920401	134925514	+	Cdkn1b	protein_coding	-0.186718	5.27897	-2.58504	0.0128967	0.507327
Kat6b	14	21481434	21672479	+	Kat6b	protein_coding	0.280099	6.04651	2.58486	0.0129028	0.507327
Plch2	4	154983115	155056785	-	Plch2	protein_coding	0.360515	5.69299	2.58402	0.0129302	0.507327
Pkd1	17	24549834	24596509	+	Pkd1	protein_coding	0.528663	6.48158	2.58293	0.0129658	0.507327
Igsf21	4	140026846	140246785	-	Igsf21	protein_coding	0.305998	5.10282	2.58173	0.0130054	0.507327
Bcorl1	X	48341358	48408050	+	Bcorl1	protein_coding	0.312983	4.76347	2.58097	0.0130304	0.507327
Clip3	7	30291728	30308368	+	Clip3	protein_coding	0.298297	9.25385	2.57891	0.0130983	0.507327
H2-K2	17	33974831	33978791	-	H2-K2	unprocessed_pseudogene	0.154152	1.16897	2.5788	0.0131021	0.507327
Epn1	7	5080235	5098179	+	Epn1	protein_coding	0.224466	8.23064	2.57875	0.0131039	0.507327
Gigyf1	5	137518548	137527936	+	Gigyf1	protein_coding	0.444434	5.36051	2.5784	0.0131152	0.507327
Piezo1	8	122481698	122551330	-	Piezo1	protein_coding	0.389205	1.94204	2.57456	0.0132433	0.507327
Rgs10	7	128373621	128418759	-	Rgs10	protein_coding	-0.280361	4.96973	-2.5745	0.0132454	0.507327
Med15	16	17651208	17732892	-	Med15	protein_coding	0.248812	5.63191	2.57441	0.0132484	0.507327
Ltk	2	119751320	119760432	-	Ltk	protein_coding	0.315282	4.20318	2.57431	0.0132515	0.507327
Aldh9a1	1	167349991	167368533	+	Aldh9a1	protein_coding	-0.176165	5.27497	-2.57411	0.0132584	0.507327
Krtcap3	5	31251691	31253203	+	Krtcap3	protein_coding	0.226347	0.876874	2.5741	0.0132586	0.507327
Slc6a17	3	107467543	107518019	-	Slc6a17	protein_coding	0.226328	9.01214	2.57408	0.0132593	0.507327
Dcdc2a	13	25056004	25210707	+	Dcdc2a	protein_coding	-0.188457	3.73453	-2.57323	0.0132877	0.507327
Tnnc2	2	164777161	164779968	-	Tnnc2	protein_coding	0.0942594	0.114866	2.57025	0.0133881	0.507327
Tctn1	5	122237848	122264461	-	Tctn1	protein_coding	0.312993	4.44631	2.56994	0.0133987	0.507327
Atxn2l	7	126491708	126503438	-	Atxn2l	protein_coding	0.428815	6.21778	2.56931	0.01342	0.507327
Rpl12	2	32961559	32965346	+	Rpl12	protein_coding	-0.372061	4.03976	-2.56792	0.013467	0.507327
Vars	17	35000987	35016323	+	Vars	protein_coding	0.294274	4.32955	2.5654	0.0135528	0.507327
Frs3os	17	47699971	47701997	-	Frs3os	antisense	0.177651	0.656747	2.56524	0.0135586	0.507327
Celsr2	3	108390851	108415553	-	Celsr2	protein_coding	0.425894	7.49628	2.56292	0.0136378	0.507327
Tm2d1	4	98355370	98383307	-	Tm2d1	protein_coding	-0.322762	2.92438	-2.56206	0.0136674	0.507327
Nlgn2	11	69823122	69837785	-	Nlgn2	protein_coding	0.321688	7.8695	2.56186	0.0136744	0.507327
Psma1	7	114264606	114276119	-	Psma1	protein_coding	-0.171504	5.91529	-2.56141	0.0136901	0.507327
Setd1b	5	123142193	123168630	+	Setd1b	protein_coding	0.406607	5.24062	2.56103	0.013703	0.507327
Rps6	4	86854660	86857413	-	Rps6	protein_coding	-0.26679	5.80137	-2.56021	0.0137314	0.507327
L1cam	X	73853778	73896106	-	L1cam	protein_coding	0.305587	7.23918	2.56015	0.0137335	0.507327
Hectd3	4	116995317	117005278	+	Hectd3	protein_coding	0.141581	6.0968	2.55992	0.0137414	0.507327
Dusp7	9	106368632	106375725	+	Dusp7	protein_coding	0.218094	6.47275	2.55939	0.0137596	0.507327
Ppp1r3c	19	36731737	36736654	-	Ppp1r3c	protein_coding	-0.207768	6.15716	-2.55902	0.0137726	0.507327
Zfp628	7	4915217	4922003	+	Zfp628	protein_coding	0.362012	3.51775	2.55627	0.0138683	0.507327
Gatm	2	122594467	122611304	-	Gatm	protein_coding	-0.213892	7.43569	-2.55563	0.0138905	0.507327
Pnpla3	15	84167837	84187237	+	Pnpla3	protein_coding	0.311699	3.32828	2.55539	0.0138988	0.507327
Ttyh3	5	140620578	140649032	-	Ttyh3	protein_coding	0.456274	7.50081	2.55538	0.0138991	0.507327
Fam189a1	7	64756091	65156571	-	Fam189a1	protein_coding	0.345001	6.34	2.55521	0.0139054	0.507327
Fam53b	7	132712082	132813887	-	Fam53b	protein_coding	0.310531	5.54279	2.55439	0.0139338	0.507327
Ggh	4	20042052	20066751	+	Ggh	protein_coding	-0.283833	3.52702	-2.55156	0.0140333	0.507327
Smco3	6	136829927	136835453	-	Smco3	protein_coding	-0.235795	3.58957	-2.55148	0.0140364	0.507327
Crls1	2	132846666	132866786	+	Crls1	protein_coding	-0.244003	5.16878	-2.5508	0.0140603	0.507327
Kcnc4	3	107438303	107459553	-	Kcnc4	protein_coding	0.232247	6.45105	2.55014	0.0140834	0.507327
Rps6kb2	19	4156713	4163355	-	Rps6kb2	protein_coding	0.269694	3.60072	2.54995	0.0140903	0.507327
Fbxo31	8	121549440	121578807	-	Fbxo31	protein_coding	0.203603	7.19289	2.5499	0.0140922	0.507327
Plekha6	1	133164210	133303436	+	Plekha6	protein_coding	0.320691	6.99317	2.5496	0.0141025	0.507327
Eef1a2	2	181147653	181157015	-	Eef1a2	protein_coding	0.203859	9.81843	2.54848	0.0141422	0.507327
Madd	2	91137360	91183838	-	Madd	protein_coding	0.264456	7.14367	2.54764	0.0141724	0.507327
Myh15	16	49057486	49199105	+	Myh15	protein_coding	-0.324023	1.46666	-2.5468	0.0142022	0.507327
Agap2	10	127075284	127093170	+	Agap2	protein_coding	0.316031	9.216	2.54677	0.0142034	0.507327
Eef1akmt1	14	57549597	57571613	-	Eef1akmt1	protein_coding	-0.205934	4.58962	-2.54663	0.0142082	0.507327
Zer1	2	30097283	30124586	-	Zer1	protein_coding	0.239933	7.45939	2.54605	0.014229	0.507327
Psmb7	2	38588036	38644088	-	Psmb7	protein_coding	-0.225659	6.06718	-2.54525	0.0142575	0.507327
Thop1	10	81070035	81082560	+	Thop1	protein_coding	0.239645	4.83722	2.54518	0.01426	0.507327
Hrh3	2	180099465	180104489	-	Hrh3	protein_coding	0.405074	6.77658	2.54441	0.0142876	0.507327
Mast3	8	70778117	70805055	-	Mast3	protein_coding	0.287248	7.77631	2.54433	0.0142905	0.507327
Ptp4a2	4	129811219	129850004	+	Ptp4a2	protein_coding	-0.14735	7.41288	-2.54291	0.0143416	0.507327
Cntnap1	11	101170523	101190725	+	Cntnap1	protein_coding	0.364858	7.94407	2.54237	0.0143608	0.507327
Tdp2	13	24831679	24842154	+	Tdp2	protein_coding	-0.192667	4.49737	-2.5417	0.014385	0.507327
Rfk	19	17394043	17401350	+	Rfk	protein_coding	-0.137526	6.49115	-2.54041	0.0144318	0.507327
Tmem151a	19	5070859	5085532	-	Tmem151a	protein_coding	0.285117	8.15133	2.53976	0.0144551	0.507327
Slc25a22	7	141429744	141437893	-	Slc25a22	protein_coding	0.316516	7.53783	2.53947	0.0144656	0.507327
Sema4c	1	36548639	36558350	-	Sema4c	protein_coding	0.225621	3.71183	2.53898	0.0144835	0.507327
Slc26a10	10	127171393	127180646	-	Slc26a10	protein_coding	0.32764	2.34772	2.53864	0.014496	0.507327
Mtor	4	148448611	148557684	+	Mtor	protein_coding	0.17799	6.75958	2.5386	0.0144974	0.507327
Rab11fip4	11	79591212	79698024	+	Rab11fip4	protein_coding	0.302075	7.44867	2.53703	0.0145544	0.507327
Gal3st3	19	5298331	5308739	+	Gal3st3	protein_coding	0.276504	5.482	2.53539	0.0146142	0.507327
Krba1	6	48395586	48419782	+	Krba1	protein_coding	0.323574	5.10653	2.53486	0.0146338	0.507327
Maml1	11	50255634	50292312	-	Maml1	protein_coding	0.339571	3.84581	2.53364	0.0146787	0.507327
C1d	11	17257579	17269177	+	C1d	protein_coding	-0.287735	5.30043	-2.53337	0.0146886	0.507327
Tom1l2	11	60226714	60352906	-	Tom1l2	protein_coding	0.196243	8.307	2.5326	0.0147168	0.507327
Syf2	4	134930898	134937549	+	Syf2	protein_coding	-0.181254	5.48939	-2.53166	0.0147516	0.507327
Tvp23b	11	62879455	62916781	+	Tvp23b	protein_coding	-0.204754	4.86256	-2.53065	0.0147889	0.507327
Ccl6	11	83587882	83593088	-	Ccl6	protein_coding	-0.417886	1.48905	-2.53043	0.014797	0.507327
Zfp335	2	164891882	164911758	-	Zfp335	protein_coding	0.298518	4.56424	2.53003	0.0148118	0.507327
Cd200r4	16	44811733	44839151	+	Cd200r4	protein_coding	-0.162607	0.457468	-2.52993	0.0148155	0.507327
Rreb1	13	37778400	37952006	+	Rreb1	protein_coding	0.494181	4.8804	2.52977	0.0148212	0.507327
Eif2ak4	2	118388618	118475235	+	Eif2ak4	protein_coding	0.209243	3.87653	2.52967	0.0148249	0.507327
Mup5	4	61831319	61835234	-	Mup5	protein_coding	-0.206899	0.444497	-2.52914	0.0148446	0.507327
AU041133	10	82128013	82153066	+	AU041133	protein_coding	-0.362468	2.87819	-2.52914	0.0148448	0.507327
Klhl34	X	157818435	157820370	+	Klhl34	protein_coding	0.379329	5.90545	2.52807	0.0148844	0.507327
Map1a	2	121289600	121310833	+	Map1a	protein_coding	0.316355	10.7889	2.52733	0.0149122	0.507327
Tmc4	7	3665790	3677554	-	Tmc4	protein_coding	0.247414	1.37423	2.52645	0.014945	0.507327
Celf5	10	81459227	81482710	-	Celf5	protein_coding	0.291523	7.96532	2.52469	0.0150107	0.507327
Perm1	4	156215868	156221308	+	Perm1	protein_coding	0.347622	1.93474	2.52442	0.0150208	0.507327
Pcsk2os2	2	143747583	143795966	-	Pcsk2os2	antisense	0.258359	2.6103	2.52205	0.01511	0.507327
Hadh	3	131233419	131272102	-	Hadh	protein_coding	-0.197103	4.86399	-2.52165	0.015125	0.507327
Rusc2	4	43381979	43427089	+	Rusc2	protein_coding	0.369383	6.56774	2.52109	0.0151463	0.507327
Cry2	2	92403646	92434044	-	Cry2	protein_coding	0.205868	7.42929	2.52107	0.0151469	0.507327
Tecpr2	12	110889264	110972395	+	Tecpr2	protein_coding	0.228011	6.68631	2.52064	0.0151634	0.507327
Inha	1	75507077	75510367	+	Inha	protein_coding	0.351323	4.24298	2.52058	0.0151654	0.507327
Ccsap	8	123840831	123860210	-	Ccsap	protein_coding	0.126879	6.24016	2.52035	0.0151741	0.507327
Klk8	7	43797577	43803827	+	Klk8	protein_coding	-0.320125	1.58613	-2.51997	0.0151886	0.507327
Bnip3l	14	66985239	67008878	-	Bnip3l	protein_coding	-0.175197	7.42146	-2.51943	0.015209	0.507327
Arnt	3	95434388	95497241	+	Arnt	protein_coding	0.231579	5.03724	2.51936	0.0152117	0.507327
Lime1	2	181380078	181383629	+	Lime1	protein_coding	0.439238	4.23242	2.51706	0.0152992	0.507327
Plekhg5	4	152072498	152115401	+	Plekhg5	protein_coding	0.319706	5.56286	2.51647	0.0153218	0.507327
Clstn1	4	149586468	149648900	+	Clstn1	protein_coding	0.197719	10.5564	2.51551	0.0153587	0.507327
Srp9	1	182124737	182132408	+	Srp9	protein_coding	-0.219819	6.09398	-2.51426	0.0154064	0.507327
Lap3	5	45493374	45512692	+	Lap3	protein_coding	-0.21894	5.79223	-2.51392	0.0154196	0.507327
Dpysl4	7	139086001	139102705	+	Dpysl4	protein_coding	0.219064	5.11936	2.5138	0.0154242	0.507327
Txlna	4	129626078	129641066	-	Txlna	protein_coding	0.246017	5.59522	2.51371	0.0154276	0.507327
Slc16a2	X	103697414	103821984	-	Slc16a2	protein_coding	0.248795	5.72543	2.51185	0.0154992	0.507327
Kif1a	1	93015464	93101952	-	Kif1a	protein_coding	0.237583	10.3531	2.51138	0.0155173	0.507327
Slc16a9	10	70245100	70285969	+	Slc16a9	protein_coding	-0.326385	2.0663	-2.51133	0.0155192	0.507327
Rfng	11	120780746	120784208	-	Rfng	protein_coding	0.294944	6.37224	2.51089	0.0155366	0.507327
Mark2	19	7275396	7341861	-	Mark2	protein_coding	0.23676	6.6772	2.50932	0.0155972	0.507327
Dapk1	13	60601947	60763192	+	Dapk1	protein_coding	0.236464	6.68408	2.50926	0.0155996	0.507327
Impdh1	6	29200434	29216365	-	Impdh1	protein_coding	0.254093	5.27078	2.50686	0.0156929	0.507327
Ahdc1	4	133011260	133078111	+	Ahdc1	protein_coding	0.387795	5.50967	2.50608	0.0157237	0.507327
Kif21b	1	136131389	136177999	+	Kif21b	protein_coding	0.496549	6.59342	2.50397	0.0158064	0.507327
Lhx9	1	138825186	138848578	-	Lhx9	protein_coding	-0.357754	0.623968	-2.50362	0.0158202	0.507327
Rpf2	10	40223246	40247037	-	Rpf2	protein_coding	-0.265766	3.63801	-2.50198	0.0158846	0.507327
Slc9a1	4	133369706	133423703	+	Slc9a1	protein_coding	0.357913	5.81713	2.50081	0.0159308	0.507327
Akap13	7	75455534	75754610	+	Akap13	protein_coding	0.389429	5.15031	2.50068	0.0159359	0.507327
Hibadh	6	52546228	52640390	-	Hibadh	protein_coding	-0.181315	5.98226	-2.50021	0.0159546	0.507327
Cd84	1	171839697	171890719	+	Cd84	protein_coding	-0.316039	1.9864	-2.49997	0.0159642	0.507327
Zfhx2	14	55060262	55092325	-	Zfhx2	protein_coding	0.469136	5.78385	2.4999	0.015967	0.507327
Atp1b3	9	96332655	96364443	-	Atp1b3	protein_coding	-0.12047	6.86733	-2.49954	0.0159812	0.507327
Wipf2	11	98863638	98905041	+	Wipf2	protein_coding	0.236214	7.08196	2.49924	0.0159933	0.507327
Scaf4	16	90225680	90284504	-	Scaf4	protein_coding	0.250154	4.68514	2.49728	0.0160712	0.507327
Flrt1	19	7092014	7105730	-	Flrt1	protein_coding	0.229562	5.10587	2.49698	0.0160831	0.507327
Bcl11a	11	24078056	24174124	+	Bcl11a	protein_coding	0.202786	6.39268	2.49685	0.0160884	0.507327
Gm15421	5	22528321	22529245	-	Gm15421	transcribed_processed_pseudogene	-0.377152	5.07645	-2.49615	0.0161162	0.507327
Ctxn3	18	57468516	57478134	+	Ctxn3	protein_coding	-0.465052	1.53252	-2.49388	0.0162072	0.507327
Brpf3	17	28801090	28839950	+	Brpf3	protein_coding	0.355937	5.46261	2.49197	0.0162842	0.507327
Gtf3c6	10	40247703	40258109	-	Gtf3c6	protein_coding	-0.187579	4.23306	-2.49174	0.0162936	0.507327
Brinp2	1	158245269	158356327	-	Brinp2	protein_coding	0.151793	7.10974	2.49162	0.0162982	0.507327
S100a9	3	90692632	90695722	-	S100a9	protein_coding	-0.324258	0.717904	-2.49162	0.0162983	0.507327
Wwc2	8	47823959	47990925	-	Wwc2	protein_coding	0.181678	5.12266	2.49109	0.0163198	0.507327
Iffo2	4	139530548	139620383	+	Iffo2	protein_coding	0.258078	4.95692	2.49006	0.0163614	0.507327
Prdm2	4	143107391	143212996	-	Prdm2	protein_coding	0.247568	6.72029	2.48978	0.016373	0.507327
Dgcr2	16	17839482	17898563	-	Dgcr2	protein_coding	0.162006	6.84377	2.48943	0.0163871	0.507327
Paip2	18	35598617	35617187	+	Paip2	protein_coding	-0.182388	7.38918	-2.48838	0.0164298	0.507327
Nr1d1	11	98767932	98775334	-	Nr1d1	protein_coding	0.28	7.37313	2.48769	0.0164577	0.507327
Slc6a6	6	91684053	91759067	+	Slc6a6	protein_coding	0.264431	7.57163	2.48713	0.0164807	0.507327
Acadm	3	153922357	153944633	-	Acadm	protein_coding	-0.198916	4.59705	-2.48708	0.0164829	0.507327
Galnt2	8	124231391	124345725	+	Galnt2	protein_coding	0.138038	5.23663	2.48655	0.0165042	0.507327
Acyp2	11	30505991	30649588	-	Acyp2	protein_coding	-0.3218	3.76545	-2.48614	0.016521	0.507327
Tubgcp6	15	89098357	89123113	-	Tubgcp6	protein_coding	0.283992	5.60091	2.48606	0.0165245	0.507327
Tifa	3	127789805	127832165	+	Tifa	protein_coding	-0.280846	3.36711	-2.48602	0.0165261	0.507327
Dab2ip	2	35558266	35730995	+	Dab2ip	protein_coding	0.303158	6.88546	2.48588	0.0165317	0.507327
Plekhg2	7	28359604	28372600	-	Plekhg2	protein_coding	0.324104	2.40499	2.48456	0.0165859	0.507327
Skiv2l2	13	112867418	112927399	-	Skiv2l2	protein_coding	-0.133117	5.89909	-2.4829	0.0166542	0.507327
Mrpl27	11	94653767	94660090	+	Mrpl27	protein_coding	-0.240157	5.06525	-2.48251	0.0166704	0.507327
Rpl31	1	39367842	39371912	+	Rpl31	protein_coding	-0.343328	4.48355	-2.48142	0.0167154	0.507327
Zbed6	1	133655879	133660886	-	Zbed6	protein_coding	0.547246	4.44463	2.48103	0.0167313	0.507327
Slirp	12	87443896	87452207	+	Slirp	protein_coding	-0.299299	3.67687	-2.48077	0.016742	0.507327
Atat1	17	35897595	35910076	-	Atat1	protein_coding	0.247442	5.52603	2.47876	0.0168254	0.507327
Tmem181b-ps	17	6438524	6467023	-	Tmem181b-ps	transcribed_unprocessed_pseudogene	0.380339	6.68171	2.47863	0.0168311	0.507327
Cops4	5	100518309	100547804	+	Cops4	protein_coding	-0.169714	6.0408	-2.47798	0.0168579	0.507327
Grip2	6	91761509	91827251	-	Grip2	protein_coding	0.332708	4.81299	2.47734	0.0168848	0.507327
Prex1	2	166566342	166713833	-	Prex1	protein_coding	0.234688	7.08965	2.47693	0.016902	0.507327
Mut	17	40934685	40961989	+	Mut	protein_coding	-0.184023	5.52051	-2.47626	0.01693	0.507327
Prr12	7	45027563	45052882	-	Prr12	protein_coding	0.545142	5.46287	2.47526	0.0169718	0.507327
Scamp5	9	57441327	57468061	-	Scamp5	protein_coding	0.119912	9.13948	2.47489	0.0169873	0.507327
Dennd6b	15	89182213	89196497	-	Dennd6b	protein_coding	0.363746	5.39874	2.47377	0.0170345	0.507327
Rbfox2	15	77078990	77307005	-	Rbfox2	protein_coding	0.204458	8.26419	2.47284	0.0170733	0.507327
Sema4f	6	82911885	82939770	-	Sema4f	protein_coding	0.28753	5.68327	2.47238	0.0170928	0.507327
Zc3h4	7	16400910	16437697	+	Zc3h4	protein_coding	0.293294	5.86779	2.47102	0.0171503	0.507327
Eef1a1	9	78478449	78489152	-	Eef1a1	protein_coding	-0.184966	10.4786	-2.47041	0.0171759	0.507327
Gpr151	18	42578020	42579653	-	Gpr151	protein_coding	-0.398222	1.13734	-2.46959	0.0172108	0.507327
Tle2	10	81574561	81590846	+	Tle2	protein_coding	0.405049	3.63917	2.46937	0.01722	0.507327
Gm16853	9	21405242	21411721	-	Gm16853	antisense	0.171209	0.401632	2.46928	0.017224	0.507327
Zdhhc18	4	133605299	133650155	-	Zdhhc18	protein_coding	0.252427	4.78372	2.46896	0.0172376	0.507327
Spen	4	141467890	141538598	-	Spen	protein_coding	0.496819	5.85913	2.46731	0.017308	0.507327
Asic1	15	99670368	99701131	+	Asic1	protein_coding	0.242935	6.35611	2.46644	0.0173449	0.507327
Ackr2	9	121898355	121911075	+	Ackr2	protein_coding	0.303328	2.89213	2.46493	0.0174098	0.507327
Rit2	18	30973489	31317291	-	Rit2	protein_coding	-0.193294	6.72865	-2.46454	0.0174266	0.507327
Nipal3	4	135445420	135495039	-	Nipal3	protein_coding	0.174269	7.30448	2.46446	0.0174297	0.507327
Cyp51	5	4081145	4104747	-	Cyp51	protein_coding	-0.164628	6.54212	-2.46417	0.0174423	0.507327
Ctss	3	95526786	95556404	+	Ctss	protein_coding	-0.249198	6.21571	-2.46406	0.017447	0.507327
Dhcr24	4	106561038	106589114	+	Dhcr24	protein_coding	0.210023	7.35304	2.46406	0.0174471	0.507327
Nim1k	13	119710094	119755883	-	Nim1k	protein_coding	-0.164768	5.18031	-2.46377	0.0174595	0.507327
Trappc9	15	72589620	73061205	-	Trappc9	protein_coding	0.214336	5.71276	2.4632	0.0174841	0.507327
H3f3b	11	116021912	116027963	-	H3f3b	protein_coding	-0.17675	7.61183	-2.46309	0.017489	0.507327
Cdh23	10	60302748	60696491	-	Cdh23	protein_coding	0.288877	0.957956	2.46273	0.0175045	0.507327
Tnk2	16	32643874	32683494	+	Tnk2	protein_coding	0.384206	7.1082	2.46211	0.017531	0.507327
Pyurf	6	57686576	57692079	-	Pyurf	protein_coding	-0.193169	5.30586	-2.46129	0.0175663	0.507327
Supt5	7	28314891	28338747	-	Supt5	protein_coding	0.193627	6.80179	2.46115	0.0175727	0.507327
Yaf2	15	93284278	93336936	-	Yaf2	protein_coding	-0.189876	6.9406	-2.46086	0.0175849	0.507327
Kcng1	2	168260117	168281737	-	Kcng1	protein_coding	0.372261	4.37635	2.45963	0.0176385	0.507327
Chchd2	5	129881156	129887471	-	Chchd2	protein_coding	-0.313621	5.92532	-2.45863	0.0176817	0.507327
Iqsec1	6	90656088	90988686	-	Iqsec1	protein_coding	0.244209	8.17551	2.45764	0.0177249	0.507327
4930565N06Rik	16	36880519	36897190	-	4930565N06Rik	antisense	0.151642	0.525039	2.45732	0.0177392	0.507327
Rpap1	2	119763304	119787538	-	Rpap1	protein_coding	0.291407	4.22808	2.4572	0.017744	0.507327
Dpp9	17	56186807	56218906	-	Dpp9	protein_coding	0.242165	5.69852	2.45694	0.0177553	0.507327
Lpcat4	2	112239468	112247112	+	Lpcat4	protein_coding	0.314107	5.89616	2.4567	0.0177662	0.507327
Map1s	8	70905932	70917530	+	Map1s	protein_coding	0.406217	4.75203	2.45622	0.0177872	0.507327
1110046J04Rik	13	33935567	33960182	+	1110046J04Rik	antisense	-0.298983	1.73938	-2.45401	0.0178838	0.507327
Pisd-ps1	11	3125904	3131005	+	Pisd-ps1	transcribed_unprocessed_pseudogene	0.251169	5.8512	2.45356	0.0179038	0.507327
Sbk1	7	126272619	126295017	+	Sbk1	protein_coding	0.288121	6.65064	2.45341	0.0179105	0.507327
Trrap	5	144767732	144859779	+	Trrap	protein_coding	0.392341	6.66771	2.45225	0.0179614	0.507327
Bet1	6	4076899	4086973	-	Bet1	protein_coding	-0.239479	4.49316	-2.452	0.0179724	0.507327
Oat	7	132557478	132576399	-	Oat	protein_coding	-0.131474	6.51262	-2.45199	0.0179728	0.507327
Arhgap21	2	20847919	20968882	-	Arhgap21	protein_coding	0.232689	7.31509	2.45171	0.0179852	0.507327
Angpt2	8	18690263	18741563	-	Angpt2	protein_coding	-0.218881	1.20574	-2.4505	0.018039	0.507327
Sdcbp	4	6365650	6408424	+	Sdcbp	protein_coding	-0.209844	7.58618	-2.45039	0.0180438	0.507327
C1s2	6	124624625	124636086	-	C1s2	protein_coding	0.118825	0.475878	2.45008	0.0180572	0.507327
Pkn3	2	30077684	30091023	+	Pkn3	protein_coding	0.207579	0.617016	2.44957	0.01808	0.507327
Trim3	7	105604463	105633572	-	Trim3	protein_coding	0.196614	6.80526	2.44911	0.0181006	0.507327
Faah	4	115967145	116017927	-	Faah	protein_coding	0.217394	6.46742	2.44768	0.0181642	0.507327
Tldc1	8	119760076	119778417	-	Tldc1	protein_coding	0.154658	3.65192	2.44673	0.0182065	0.507327
Foxk1	5	142401497	142462012	+	Foxk1	protein_coding	0.334033	6.1292	2.4447	0.0182973	0.507327
Tle3	9	61372366	61418498	+	Tle3	protein_coding	0.324611	4.86157	2.44428	0.018316	0.507327
Fam213a	14	40993740	41013789	-	Fam213a	protein_coding	-0.221313	7.01554	-2.44423	0.0183183	0.507327
Rps27	3	90212522	90213652	-	Rps27	protein_coding	-0.316918	3.91755	-2.4442	0.0183197	0.507327
Dcakd	11	102994047	103028334	-	Dcakd	protein_coding	0.221339	4.73103	2.44398	0.0183298	0.507327
Txndc11	16	11074911	11134651	-	Txndc11	protein_coding	0.219644	4.70137	2.44346	0.0183532	0.507327
Ncor2	5	125017153	125179220	-	Ncor2	protein_coding	0.402453	5.99611	2.44332	0.0183591	0.507327
Ppp1r10	17	35916434	35932284	+	Ppp1r10	protein_coding	0.204515	5.32117	2.44277	0.0183843	0.507327
Slc35c1	2	92452764	92460539	-	Slc35c1	protein_coding	0.251334	4.48966	2.44097	0.0184655	0.507327
Cluh	11	74649495	74670848	+	Cluh	protein_coding	0.16908	6.52385	2.44086	0.0184701	0.507327
B4galnt1	10	127165225	127172331	+	B4galnt1	protein_coding	0.190694	7.30789	2.43879	0.0185643	0.507327
Fut7	2	25423267	25426375	+	Fut7	protein_coding	0.118209	0.29243	2.43861	0.0185724	0.507327
0610030E20Rik	6	72347317	72353149	+	0610030E20Rik	protein_coding	0.278702	4.53909	2.43818	0.018592	0.507327
Rapgef1	2	29619720	29740979	+	Rapgef1	protein_coding	0.243773	6.77203	2.43778	0.0186103	0.507327
Zbtb40	4	136979732	137048802	-	Zbtb40	protein_coding	0.451386	3.92258	2.43673	0.0186579	0.507327
Col4a2	8	11312805	11449288	+	Col4a2	protein_coding	0.444176	5.22395	2.43505	0.0187351	0.507327
C2cd4c	10	79606854	79614026	-	C2cd4c	protein_coding	0.258322	4.45391	2.43503	0.0187357	0.507327
Plekhn1	4	156221456	156234858	-	Plekhn1	protein_coding	0.314209	2.97892	2.43503	0.0187357	0.507327
Tmem47	X	81070698	81097873	+	Tmem47	protein_coding	-0.22036	7.46616	-2.43399	0.0187836	0.507327
Slc25a42	8	70184340	70212306	-	Slc25a42	protein_coding	0.350179	5.06354	2.43337	0.0188119	0.507327
Churc1	12	76765538	76783181	+	Churc1	protein_coding	-0.237239	3.90393	-2.43323	0.0188187	0.507327
Atp2b4	1	133699457	133801042	-	Atp2b4	protein_coding	0.329611	8.33657	2.43234	0.0188594	0.507327
Aars	8	111033144	111057665	+	Aars	protein_coding	0.141968	7.51263	2.43201	0.0188748	0.507327
Tef	15	81802421	81826864	+	Tef	protein_coding	0.149938	9.07965	2.43086	0.018928	0.507327
Abcg4	9	44273188	44288616	-	Abcg4	protein_coding	0.344379	5.77638	2.42907	0.0190109	0.507327
Pex6	17	46711463	46725542	+	Pex6	protein_coding	0.275802	5.00515	2.42842	0.0190412	0.507327
Mapt	11	104231390	104332091	+	Mapt	protein_coding	0.137015	9.51197	2.4283	0.0190468	0.507327
Atn1	6	124742544	124756525	-	Atn1	protein_coding	0.50936	7.30171	2.42827	0.0190482	0.507327
Plekhm1	11	103364275	103412688	-	Plekhm1	protein_coding	0.290948	5.22506	2.42767	0.019076	0.507327
Rnft2	5	118190736	118245117	-	Rnft2	protein_coding	0.1998	6.67981	2.42765	0.0190768	0.507327
Pml	9	58218076	58249787	-	Pml	protein_coding	0.254588	4.11228	2.42765	0.019077	0.507327
Mcm3ap	10	76468927	76515858	+	Mcm3ap	protein_coding	0.249611	5.66741	2.42738	0.0190892	0.507327
Cdk18	1	132112237	132139685	-	Cdk18	protein_coding	0.296722	5.29006	2.42716	0.0190999	0.507327
Slc35g2	9	100552188	100571091	-	Slc35g2	protein_coding	-0.210328	4.65384	-2.42645	0.0191327	0.507327
Sptan1	2	29965560	30031452	+	Sptan1	protein_coding	0.278542	9.39872	2.42617	0.0191462	0.507327
Rps25	9	44407139	44410428	+	Rps25	protein_coding	-0.33958	4.79703	-2.42536	0.0191838	0.507327
Flad1	3	89401004	89411871	-	Flad1	protein_coding	0.184391	4.82196	2.42532	0.0191855	0.507327
Sptbn2	19	4711208	4752354	+	Sptbn2	protein_coding	0.357892	9.84808	2.42512	0.0191949	0.507327
Nol6	4	41114427	41124456	-	Nol6	protein_coding	0.236663	6.76715	2.42431	0.019233	0.507327
Tmem201	4	149715375	149738045	-	Tmem201	protein_coding	0.2601	6.07995	2.4236	0.0192664	0.507327
C330018D20Rik	18	56955833	56975369	-	C330018D20Rik	protein_coding	-0.318659	4.06278	-2.42304	0.0192927	0.507327
Dido1	2	180657964	180710000	-	Dido1	protein_coding	0.231971	6.40189	2.42283	0.0193026	0.507327
Fam71f2	6	29279593	29290681	+	Fam71f2	protein_coding	0.167914	0.498367	2.42169	0.0193566	0.507327
D430042O09Rik	7	125707888	125874794	+	D430042O09Rik	protein_coding	0.233102	4.6235	2.42114	0.0193821	0.507327
Pacs1	19	5133688	5273120	-	Pacs1	protein_coding	0.31171	6.60828	2.42086	0.0193954	0.507327
Klhl3	13	58000228	58113593	-	Klhl3	protein_coding	0.322387	4.19292	2.42025	0.0194244	0.507327
Sobp	10	43002500	43174531	-	Sobp	protein_coding	0.216043	6.3794	2.42008	0.0194324	0.507327
Tcof1	18	60813755	60848972	-	Tcof1	protein_coding	0.304009	4.50029	2.42007	0.0194331	0.507327
Sort1	3	108284082	108361512	+	Sort1	protein_coding	0.258923	9.14447	2.41904	0.0194821	0.507327
Nanos2	7	18987400	18988963	+	Nanos2	protein_coding	0.168309	0.587955	2.41883	0.0194918	0.507327
Pi4k2b	5	52741574	52769341	+	Pi4k2b	protein_coding	-0.238838	1.96097	-2.41866	0.0194997	0.507327
Csrnp2	15	100479570	100495489	-	Csrnp2	protein_coding	0.154327	5.29025	2.41755	0.0195528	0.507327
Pfkl	10	77986947	78010084	-	Pfkl	protein_coding	0.167612	7.0736	2.41466	0.0196906	0.507327
Arsb	13	93771630	93943017	+	Arsb	protein_coding	0.16902	7.39455	2.41447	0.0196999	0.507327
Slc16a8	15	79251014	79254762	-	Slc16a8	protein_coding	-0.183352	0.464623	-2.41351	0.0197461	0.507327
Ubap2	4	41194313	41275145	-	Ubap2	protein_coding	0.289335	5.02004	2.41338	0.0197524	0.507327
Ttbk1	17	46442448	46487676	-	Ttbk1	protein_coding	0.427488	6.56953	2.41207	0.0198152	0.507327
1500011K16Rik	2	127791388	127792489	-	1500011K16Rik	protein_coding	-0.347442	4.5064	-2.41098	0.0198679	0.507327
Pomp	5	147860461	147876457	+	Pomp	protein_coding	-0.225469	6.14881	-2.41093	0.0198705	0.507327
Khsrp	17	57021051	57031523	-	Khsrp	protein_coding	0.292146	6.10973	2.41062	0.0198854	0.507327
Trio	15	27730651	28025849	-	Trio	protein_coding	0.226612	6.79849	2.40903	0.0199622	0.507327
Timm8a1	X	134537256	134541866	-	Timm8a1	protein_coding	-0.247033	3.6507	-2.40882	0.0199725	0.507327
Ralyl	3	13471655	14182288	+	Ralyl	protein_coding	-0.170894	6.2312	-2.40844	0.0199911	0.507327
Polr3a	14	24448696	24487059	-	Polr3a	protein_coding	0.229527	4.61738	2.40829	0.0199982	0.507327
Fam32a	8	72219730	72224419	+	Fam32a	protein_coding	-0.1746	6.6999	-2.40787	0.0200187	0.507327
Furin	7	80388585	80405437	-	Furin	protein_coding	0.334365	4.3781	2.40786	0.0200195	0.507327
Cnbp	6	87842615	87851107	-	Cnbp	protein_coding	-0.184445	8.31818	-2.40749	0.0200371	0.507327
Faim2	15	99497012	99528166	-	Faim2	protein_coding	0.222494	8.93697	2.40748	0.0200375	0.507327
Zfp574	7	25072567	25083493	+	Zfp574	protein_coding	0.350746	5.03247	2.40747	0.0200381	0.507327
Col5a1	2	27886425	28039515	+	Col5a1	protein_coding	0.514826	3.90828	2.40705	0.0200587	0.507327
Rbm14	19	4800569	4811635	-	Rbm14	protein_coding	0.215415	4.9888	2.40569	0.0201252	0.507327
Atcay	10	81204508	81230834	-	Atcay	protein_coding	0.129072	7.90194	2.40521	0.0201487	0.507327
Mum1	10	80226434	80243904	+	Mum1	protein_coding	0.215191	4.52975	2.40463	0.0201767	0.507327
Snd1	6	28475139	28935163	+	Snd1	protein_coding	0.123712	5.96422	2.40339	0.0202379	0.507327
Rps4x	X	102184941	102189395	-	Rps4x	protein_coding	-0.220399	5.72415	-2.40329	0.0202425	0.507327
Gm15772	5	3236431	3236869	+	Gm15772	processed_pseudogene	-0.270058	6.97264	-2.40186	0.0203129	0.507327
Gm10409	14	3412614	3433801	+	Gm10409	protein_coding	-0.160556	1.01532	-2.40012	0.020399	0.507327
Chd4	6	125095981	125130592	+	Chd4	protein_coding	0.177796	7.15465	2.39995	0.0204075	0.507327
Prkcg	7	3289179	3331100	+	Prkcg	protein_coding	0.364161	8.23001	2.39856	0.0204762	0.507327
Slc7a5	8	121881150	121907695	-	Slc7a5	protein_coding	0.263857	5.86894	2.39852	0.0204786	0.507327
Thoc7	14	13949012	13961853	-	Thoc7	protein_coding	-0.256618	4.66939	-2.39844	0.0204822	0.507327
Ammecr1	X	142851146	142966729	-	Ammecr1	protein_coding	0.256675	1.84681	2.39762	0.020523	0.507327
Smpd3	8	106252548	106337989	-	Smpd3	protein_coding	0.253979	6.9869	2.39754	0.0205272	0.507327
Slc25a23	17	57043711	57059864	-	Slc25a23	protein_coding	0.244079	9.35535	2.39731	0.0205384	0.507327
Ndst2	14	20723730	20734563	-	Ndst2	protein_coding	0.224137	3.91171	2.39725	0.0205415	0.507327
Extl1	4	134356372	134383851	-	Extl1	protein_coding	0.198814	6.37003	2.39666	0.020571	0.507327
Ptma	1	86526726	86530713	+	Ptma	protein_coding	-0.20581	6.87272	-2.39522	0.0206429	0.507327
Fgd1	X	151046150	151089522	+	Fgd1	protein_coding	0.293035	3.11265	2.39469	0.0206692	0.507327
Ndufv2	17	66078638	66101560	-	Ndufv2	protein_coding	-0.229082	6.27554	-2.39458	0.020675	0.507327
Shank1	7	44310253	44360573	+	Shank1	protein_coding	0.623155	8.16839	2.39433	0.0206875	0.507327
Utp3	5	88554462	88556091	+	Utp3	protein_coding	-0.16189	5.27098	-2.39391	0.0207084	0.507327
Sap25	5	137641334	137642903	+	Sap25	protein_coding	0.398653	0.979118	2.39367	0.0207203	0.507327
Gabbr2	4	46662305	46991874	-	Gabbr2	protein_coding	0.388856	7.97056	2.39348	0.0207298	0.507327
Gapvd1	2	34674594	34755233	-	Gapvd1	protein_coding	0.180204	6.47747	2.39134	0.020838	0.50795
Spp1	5	104435118	104441051	+	Spp1	protein_coding	-0.304878	2.89346	-2.3909	0.0208598	0.50795
Ndst3	3	123526166	123690854	-	Ndst3	protein_coding	0.286052	5.1384	2.39001	0.020905	0.50795
Slc9a5	8	105348843	105369882	+	Slc9a5	protein_coding	0.259302	5.10581	2.38924	0.020944	0.50795
Ebag9	15	44619175	44641516	+	Ebag9	protein_coding	-0.184221	4.48052	-2.38859	0.020977	0.50795
Pld3	7	27532000	27553219	-	Pld3	protein_coding	0.212521	9.01293	2.38791	0.0210115	0.50795
Ttc17	2	94300767	94406690	-	Ttc17	protein_coding	0.170689	5.18397	2.38781	0.0210163	0.50795
Glrx3	7	137437614	137468595	+	Glrx3	protein_coding	-0.277359	4.56818	-2.38686	0.021065	0.50795
Nckipsd	9	108808368	108818845	+	Nckipsd	protein_coding	0.169567	6.22205	2.38682	0.0210669	0.50795
Rnf13	3	57736062	57835234	+	Rnf13	protein_coding	-0.171926	7.41069	-2.38578	0.0211197	0.50795
Slitrk3	3	73047265	73057804	-	Slitrk3	protein_coding	0.191057	6.05137	2.3857	0.0211239	0.50795
Meg3	12	109541001	109571727	+	Meg3	lincRNA	0.336309	11.2282	2.38531	0.0211437	0.50795
Clybl	14	122181704	122402235	+	Clybl	protein_coding	-0.221878	4.30911	-2.38375	0.0212239	0.50795
Agap1	1	89454806	89897618	+	Agap1	protein_coding	0.264969	7.26927	2.38254	0.0212859	0.50795
Btf3l4	4	108814295	108833615	-	Btf3l4	protein_coding	-0.174087	6.06737	-2.38244	0.0212911	0.50795
Vars2	17	35655634	35667593	-	Vars2	protein_coding	0.263911	4.15295	2.38185	0.0213215	0.50795
Rfx1	8	84066834	84096993	+	Rfx1	protein_coding	0.471878	3.80604	2.38181	0.0213237	0.50795
Man2a2	7	80349097	80371376	-	Man2a2	protein_coding	0.234122	7.82461	2.3818	0.0213239	0.50795
Chmp3	6	71543797	71582610	+	Chmp3	protein_coding	-0.122413	7.27043	-2.38174	0.0213271	0.50795
Chek2	5	110839979	110874146	+	Chek2	protein_coding	-0.272046	1.06773	-2.38095	0.021368	0.50795
Mslnl	17	25736040	25748331	+	Mslnl	protein_coding	0.185851	0.48572	2.38051	0.0213907	0.50795
Ercc6	14	32513521	32580991	+	Ercc6	protein_coding	0.263717	5.38203	2.38005	0.0214141	0.50795
Gm20939	17	94873986	94877498	+	Gm20939	protein_coding	-0.253604	1.85563	-2.37912	0.0214624	0.508383
Ptp4a1	1	30940302	30949771	-	Ptp4a1	protein_coding	-0.179133	5.67269	-2.37825	0.0215073	0.508737
Usp49	17	47630690	47686739	+	Usp49	protein_coding	0.238294	4.41088	2.37751	0.0215458	0.508872
Rims4	2	163859751	163918684	-	Rims4	protein_coding	0.221215	4.69172	2.37699	0.0215731	0.508872
Jkamp	12	72085589	72101462	+	Jkamp	protein_coding	-0.169758	5.72015	-2.37503	0.0216754	0.509554
Katnb1	8	95081186	95103150	+	Katnb1	protein_coding	0.212738	4.88651	2.37452	0.0217018	0.509554
Mog	17	37010743	37023399	-	Mog	protein_coding	-0.244451	6.24217	-2.37445	0.0217059	0.509554
Bcl2l13	6	120836212	120892843	+	Bcl2l13	protein_coding	0.153871	6.26911	2.37413	0.0217221	0.509554
Prr36	8	4209543	4217460	-	Prr36	protein_coding	0.29757	5.51277	2.37354	0.0217532	0.509579
Fam168b	1	34813219	34843066	-	Fam168b	protein_coding	0.172463	8.57104	2.37247	0.0218093	0.510186
Nhlh2	3	102010076	102015493	+	Nhlh2	protein_coding	-0.286874	0.425449	-2.3714	0.0218656	0.510799
Phactr1	13	42680623	43138527	+	Phactr1	protein_coding	0.158933	9.30967	2.37019	0.0219293	0.511584
Meig1	2	3409043	3422649	-	Meig1	protein_coding	-0.194867	0.967404	-2.36811	0.0220395	0.51297
Mettl17	14	51884842	51893040	+	Mettl17	protein_coding	0.260181	3.00795	2.36758	0.0220677	0.51297
Ighmbp2	19	3260924	3283018	-	Ighmbp2	protein_coding	0.248059	3.5956	2.36699	0.0220993	0.51297
Hnmt	2	24002910	24049395	-	Hnmt	protein_coding	-0.240494	4.86043	-2.36679	0.0221097	0.51297
Gigyf2	1	87326998	87450797	+	Gigyf2	protein_coding	0.197885	6.0325	2.36528	0.0221904	0.513527
Epha8	4	136929419	136956817	-	Epha8	protein_coding	0.38818	3.11093	2.3652	0.0221943	0.513527
Dctn1	6	83165920	83200118	+	Dctn1	protein_coding	0.317595	7.50102	2.36378	0.0222702	0.513692
Zfyve26	12	79232346	79296305	-	Zfyve26	protein_coding	0.304519	4.49937	2.36345	0.0222882	0.513692
Zyx	6	42349630	42360214	+	Zyx	protein_coding	0.26515	5.40006	2.36291	0.0223169	0.513692
Rbm15b	9	106880918	106887429	-	Rbm15b	protein_coding	0.134256	5.7083	2.3625	0.0223394	0.513692
Rpl10	X	74270812	74273136	+	Rpl10	protein_coding	-0.234631	5.38456	-2.36014	0.0224659	0.513692
Fbxl18	5	142866946	142895422	-	Fbxl18	protein_coding	0.356052	3.94927	2.35996	0.022476	0.513692
Atxn7l2	3	108202222	108210935	-	Atxn7l2	protein_coding	0.368649	3.87988	2.35978	0.0224858	0.513692
Fam174a	1	95313623	95335285	+	Fam174a	protein_coding	-0.231869	5.55342	-2.35919	0.0225175	0.513692
Sart1	19	5377523	5388704	-	Sart1	protein_coding	0.222754	5.14591	2.35658	0.0226589	0.513692
Ciz1	2	32352327	32380971	+	Ciz1	protein_coding	0.274017	4.9685	2.35617	0.0226816	0.513692
Sf3b6	12	4817544	4827660	+	Sf3b6	protein_coding	-0.251421	5.0869	-2.3557	0.022707	0.513692
Igip	18	36300101	36301518	+	Igip	protein_coding	-0.184092	6.62852	-2.35551	0.0227174	0.513692
Mark4	7	19424775	19458822	-	Mark4	protein_coding	0.354203	4.55121	2.35515	0.022737	0.513692
Sowahc	10	59221953	59226435	+	Sowahc	protein_coding	-0.246902	4.09467	-2.35503	0.0227433	0.513692
Ddx23	15	98645134	98662895	-	Ddx23	protein_coding	0.148469	5.79278	2.35498	0.022746	0.513692
Gpr173	X	152343598	152368705	-	Gpr173	protein_coding	0.201286	4.34325	2.35486	0.022753	0.513692
Plek	11	16971206	17052382	-	Plek	protein_coding	-0.238268	4.57619	-2.35372	0.0228152	0.513692
Elmsan1	12	84149176	84218882	-	Elmsan1	protein_coding	0.290211	4.8476	2.35249	0.0228825	0.513692
Wasf1	10	40883475	40938571	+	Wasf1	protein_coding	0.129496	7.97471	2.35243	0.0228858	0.513692
Fxn	19	24261453	24280606	-	Fxn	protein_coding	-0.262164	2.00422	-2.35073	0.0229793	0.513692
Ccdc190	1	169928648	169934654	+	Ccdc190	protein_coding	-0.299629	4.06766	-2.34981	0.0230301	0.513692
Lrp1	10	127538161	127621149	-	Lrp1	protein_coding	0.259311	8.18614	2.34957	0.0230435	0.513692
Tmem37	1	120067377	120074075	-	Tmem37	protein_coding	-0.261766	1.25334	-2.34804	0.0231279	0.513692
Tmem184b	15	79360684	79403570	-	Tmem184b	protein_coding	0.278551	6.18698	2.34671	0.0232018	0.513692
Mroh1	15	76380261	76453039	+	Mroh1	protein_coding	0.248337	5.32	2.3462	0.0232299	0.513692
Epha10	4	124880899	124917801	+	Epha10	protein_coding	0.299976	5.50971	2.34613	0.023234	0.513692
Adamts17	7	66839735	67153172	+	Adamts17	protein_coding	0.346752	2.45727	2.34569	0.0232584	0.513692
Per3	4	151003652	151044666	-	Per3	protein_coding	0.272709	5.76161	2.34548	0.0232699	0.513692
Plekhb1	7	100642892	100662415	-	Plekhb1	protein_coding	-0.210953	8.81147	-2.34497	0.0232987	0.513692
Dnmbp	19	43846821	43940192	-	Dnmbp	protein_coding	0.346451	3.87675	2.34381	0.023363	0.513692
Dlgap3	4	127169204	127237023	+	Dlgap3	protein_coding	0.382385	7.34874	2.34359	0.0233757	0.513692
Cers1	8	70315775	70331593	+	Cers1	protein_coding	0.41782	4.96272	2.34352	0.0233792	0.513692
Eif5	12	111538016	111546753	+	Eif5	protein_coding	-0.163239	7.71629	-2.34155	0.0234898	0.513692
Hip1	5	135406531	135545121	-	Hip1	protein_coding	0.272844	5.78621	2.34149	0.0234934	0.513692
Mfsd1	3	67582741	67604238	+	Mfsd1	protein_coding	-0.18432	4.50469	-2.3413	0.0235041	0.513692
Unc13a	8	71624417	71671758	-	Unc13a	protein_coding	0.287788	8.43871	2.34117	0.0235114	0.513692
Dusp8	7	142079490	142095844	-	Dusp8	protein_coding	0.202068	7.53362	2.34116	0.023512	0.513692
Prrc2a	17	35149076	35164898	-	Prrc2a	protein_coding	0.444838	8.00869	2.3404	0.0235544	0.513692
2810013P06Rik	8	123042466	123044603	+	2810013P06Rik	bidirectional_promoter_lncRNA	-0.223101	4.62367	-2.33902	0.0236326	0.513692
Cacna1h	17	25374285	25433784	-	Cacna1h	protein_coding	0.417639	5.29256	2.33899	0.0236338	0.513692
Uqcrc2	7	120635176	120659525	+	Uqcrc2	protein_coding	-0.16511	7.59655	-2.33811	0.0236838	0.513692
Rab36	10	75037058	75054749	+	Rab36	protein_coding	0.269119	4.61831	2.33749	0.0237187	0.513692
Atg12	18	46732417	46741580	-	Atg12	protein_coding	-0.12413	6.77925	-2.33716	0.0237377	0.513692
Fbrsl1	5	110361754	110448504	-	Fbrsl1	protein_coding	0.270206	4.89302	2.33707	0.0237429	0.513692
Mchr1	15	81235499	81238965	+	Mchr1	protein_coding	0.169746	5.18714	2.33695	0.0237496	0.513692
Med16	10	79894708	79908924	-	Med16	protein_coding	0.241201	5.5197	2.33664	0.0237674	0.513692
Zfp663	2	165351297	165368730	-	Zfp663	protein_coding	0.115833	0.147552	2.33582	0.0238135	0.513692
Phrf1	7	141228784	141262751	+	Phrf1	protein_coding	0.241231	5.65617	2.33561	0.0238255	0.513692
Islr2	9	58196297	58204320	-	Islr2	protein_coding	0.245565	6.05402	2.33478	0.0238732	0.513692
Zfp831	2	174643534	174710833	+	Zfp831	protein_coding	0.298989	5.35518	2.33399	0.0239179	0.513692
Pik3r2	8	70768176	70776714	-	Pik3r2	protein_coding	0.202606	6.76769	2.33381	0.0239284	0.513692
Phc1	6	122317731	122340562	-	Phc1	protein_coding	0.245615	5.3781	2.33331	0.0239567	0.513692
Brsk2	7	141949751	142004248	+	Brsk2	protein_coding	0.216376	7.18257	2.33318	0.0239644	0.513692
Tfam	10	71225464	71238281	-	Tfam	protein_coding	-0.236044	5.3709	-2.33241	0.0240082	0.513692
Gramd1b	9	40293233	40531384	-	Gramd1b	protein_coding	0.297024	5.97518	2.33229	0.0240151	0.513692
Rnpepl1	1	92910783	92924385	+	Rnpepl1	protein_coding	0.283671	4.29108	2.33033	0.0241278	0.513692
Cyp2j9	4	96568429	96591579	-	Cyp2j9	protein_coding	-0.210625	4.97937	-2.33004	0.0241443	0.513692
Cops3	11	59817795	59839839	-	Cops3	protein_coding	-0.178529	5.70041	-2.32964	0.0241676	0.513692
Wrn	8	33234384	33385528	-	Wrn	protein_coding	0.201083	3.94803	2.32944	0.0241791	0.513692
Rpl39	X	37082520	37085403	-	Rpl39	protein_coding	-0.310801	4.02737	-2.32637	0.0243564	0.513692
Arhgap39	15	76723985	76818171	-	Arhgap39	protein_coding	0.224309	5.69052	2.32608	0.0243733	0.513692
1600002K03Rik	10	80172944	80175147	+	1600002K03Rik	protein_coding	-0.208106	1.59861	-2.32597	0.0243797	0.513692
Gm10857	2	6132869	6140569	+	Gm10857	lincRNA	0.168482	1.4925	2.32581	0.0243892	0.513692
Ube2v2	16	15552077	15595774	-	Ube2v2	protein_coding	-0.254665	6.17436	-2.32538	0.024414	0.513692
Pxdn	12	29937608	30017659	+	Pxdn	protein_coding	0.349674	5.92082	2.32413	0.0244866	0.513692
Plscr2	9	92275602	92297753	+	Plscr2	protein_coding	-0.249516	1.00554	-2.32386	0.0245026	0.513692
Atp9b	18	80734141	80934059	-	Atp9b	protein_coding	0.185021	5.65477	2.32216	0.0246018	0.513692
Gt(ROSA)26Sor	6	113067428	113077334	-	Gt(ROSA)26Sor	antisense	-0.278375	3.90111	-2.32175	0.0246262	0.513692
Prrt1	17	34629533	34633127	+	Prrt1	protein_coding	0.385434	5.00612	2.32173	0.0246272	0.513692
Usp19	9	108490602	108502338	+	Usp19	protein_coding	0.251933	6.08279	2.32049	0.0246997	0.513692
Zfp944	17	22337989	22361401	-	Zfp944	protein_coding	-0.224273	4.40578	-2.32044	0.024703	0.513692
Vegfd	X	164373378	164402651	+	Vegfd	protein_coding	0.330461	1.79291	2.32009	0.0247231	0.513692
Tnrc6a	7	123123885	123195297	+	Tnrc6a	protein_coding	0.224279	6.46583	2.3194	0.024764	0.513692
Tgfbr1	4	47353222	47414932	+	Tgfbr1	protein_coding	-0.184368	5.54697	-2.31927	0.0247718	0.513692
Klf13	7	63886351	63938916	-	Klf13	protein_coding	0.256278	7.61224	2.3189	0.0247935	0.513692
Vps37b	5	124004641	124032271	-	Vps37b	protein_coding	0.200128	4.88017	2.31882	0.024798	0.513692
Strada	11	106163330	106202169	-	Strada	protein_coding	0.186255	4.78327	2.31873	0.0248033	0.513692
Itfg1	8	85717578	85840922	-	Itfg1	protein_coding	-0.156992	8.04873	-2.31872	0.0248043	0.513692
Bcas1	2	170346991	170427846	-	Bcas1	protein_coding	-0.246219	8.05269	-2.31814	0.0248382	0.513692
Gak	5	108569411	108629756	-	Gak	protein_coding	0.137979	6.57974	2.3179	0.0248523	0.513692
Rpl32l	10	20208490	20208889	+	Rpl32l	processed_pseudogene	-0.291636	4.78599	-2.31786	0.0248549	0.513692
Ap1b1	11	4986824	5042792	+	Ap1b1	protein_coding	0.171272	7.39129	2.31778	0.0248593	0.513692
Sgsm2	11	74849261	74897061	-	Sgsm2	protein_coding	0.248405	6.87382	2.31752	0.0248748	0.513692
Rpl4	9	64173375	64178667	+	Rpl4	protein_coding	-0.201152	8.53893	-2.31707	0.0249018	0.513692
Ccdc88c	12	100911523	101029057	-	Ccdc88c	protein_coding	0.355454	4.82337	2.31677	0.0249195	0.513692
Kcnab2	4	152390742	152477872	-	Kcnab2	protein_coding	0.157471	8.88245	2.31607	0.0249611	0.513692
Pdk2	11	95026258	95041355	-	Pdk2	protein_coding	0.199993	6.98442	2.31551	0.0249941	0.513692
Cbx6	15	79823896	79834689	-	Cbx6	protein_coding	0.206626	9.04535	2.31499	0.0250248	0.513692
Fam219a	4	41517691	41569539	-	Fam219a	protein_coding	0.261953	7.06265	2.31485	0.0250331	0.513692
Ppa1	10	61648552	61674169	+	Ppa1	protein_coding	-0.169945	5.8423	-2.3142	0.0250716	0.513692
Pianp	6	124996694	125003097	+	Pianp	protein_coding	0.34567	7.39362	2.3141	0.0250778	0.513692
Nt5dc3	10	86779005	86838390	+	Nt5dc3	protein_coding	0.219655	7.15839	2.31363	0.0251058	0.513692
Pex7	10	19853900	19907690	-	Pex7	protein_coding	-0.204075	4.3625	-2.3127	0.0251616	0.513692
Ghrl	6	113716119	113719881	-	Ghrl	protein_coding	0.212144	0.508737	2.31235	0.0251821	0.513692
Slc2a4rg-ps	2	181384250	181387587	+	Slc2a4rg-ps	transcribed_unitary_pseudogene	0.372058	2.7744	2.31122	0.02525	0.513692
Mr1	1	155127277	155146815	-	Mr1	protein_coding	-0.244288	3.16982	-2.30969	0.0253418	0.513692
Spg21	9	65460947	65488471	+	Spg21	protein_coding	-0.180366	5.18963	-2.30969	0.025342	0.513692
Flii	11	60714123	60727264	-	Flii	protein_coding	0.218891	5.32846	2.30886	0.0253918	0.513692
Rnase1	14	51144998	51146786	-	Rnase1	protein_coding	-0.242439	0.541756	-2.30881	0.0253946	0.513692
Cdc42bpb	12	111292976	111377719	-	Cdc42bpb	protein_coding	0.343026	6.9341	2.30778	0.0254566	0.513692
Mmp17	5	129584169	129611100	+	Mmp17	protein_coding	0.183284	8.18133	2.30762	0.0254662	0.513692
Prrc2b	2	32151082	32234538	+	Prrc2b	protein_coding	0.296857	9.05507	2.30724	0.0254893	0.513692
Arl11	14	61309753	61311937	+	Arl11	protein_coding	-0.229452	0.875159	-2.30722	0.0254903	0.513692
Gan	8	117158135	117215998	+	Gan	protein_coding	0.304671	2.99274	2.3072	0.0254919	0.513692
Vwa5b2	16	20589471	20605378	+	Vwa5b2	protein_coding	0.339971	5.29547	2.30569	0.025583	0.513692
Kcnd1	X	7822289	7838281	+	Kcnd1	protein_coding	0.212545	4.05392	2.30489	0.0256316	0.513692
1810014B01Rik	10	86685525	86694807	+	1810014B01Rik	transcribed_unprocessed_pseudogene	-0.26445	2.74334	-2.30481	0.0256367	0.513692
Gprin1	13	54736671	54749875	-	Gprin1	protein_coding	0.214338	7.28653	2.30466	0.0256456	0.513692
Tmem181a	17	6256860	6308315	+	Tmem181a	protein_coding	0.253077	6.30033	2.30457	0.025651	0.513692
Grin2d	7	45831883	45878379	-	Grin2d	protein_coding	0.311904	3.60502	2.30359	0.0257106	0.513692
Ptger1	8	83666678	83672754	+	Ptger1	protein_coding	0.365459	3.13534	2.30288	0.0257538	0.513692
Gabarapl2	8	111940703	111953613	+	Gabarapl2	protein_coding	-0.211436	5.9787	-2.30272	0.0257641	0.513692
Usp35	7	97309380	97332021	-	Usp35	protein_coding	0.223094	4.64767	2.30206	0.025804	0.513692
Rtn4rl1	11	75193783	75267770	+	Rtn4rl1	protein_coding	0.156748	6.63297	2.30202	0.0258065	0.513692
Gcsh	8	116981810	116993538	-	Gcsh	protein_coding	-0.221625	5.54353	-2.29992	0.0259349	0.513692
Psma7	2	180036374	180042434	-	Psma7	protein_coding	-0.194438	5.83407	-2.29951	0.0259601	0.513692
Ncdn	4	126743750	126753439	-	Ncdn	protein_coding	0.333722	10.3208	2.29933	0.0259714	0.513692
Rnf123	9	108051534	108083347	-	Rnf123	protein_coding	0.377118	4.74568	2.29896	0.0259944	0.513692
Rps7	12	28630854	28635954	-	Rps7	protein_coding	-0.338234	3.81475	-2.29835	0.0260318	0.513692
Mrps35	6	147042764	147073992	+	Mrps35	protein_coding	-0.208795	4.11797	-2.29783	0.0260635	0.513692
Mkl2	16	13256481	13417530	+	Mkl2	protein_coding	0.262002	8.53073	2.29733	0.0260948	0.513692
Myo16	8	10153911	10634743	+	Myo16	protein_coding	0.28989	4.87519	2.29679	0.0261277	0.513692
Mrpl50	4	49512596	49521094	-	Mrpl50	protein_coding	-0.154141	5.72331	-2.29596	0.026179	0.513692
Tpm4	8	72134975	72153143	+	Tpm4	protein_coding	-0.232801	4.9599	-2.29549	0.0262083	0.513692
Chga	12	102554969	102565029	+	Chga	protein_coding	0.209469	7.31509	2.29514	0.0262299	0.513692
Fam45a	19	60811585	60836228	+	Fam45a	protein_coding	-0.181217	5.4158	-2.2946	0.0262634	0.513692
4930404I05Rik	16	91011249	91016744	+	4930404I05Rik	processed_transcript	0.245883	1.07836	2.29453	0.026268	0.513692
Hps4	5	112343083	112378415	+	Hps4	protein_coding	0.27802	3.74024	2.29434	0.0262799	0.513692
Gpr107	2	31152316	31218776	+	Gpr107	protein_coding	0.18258	5.65522	2.2939	0.0263073	0.513692
Pigl	11	62458460	62514418	+	Pigl	protein_coding	0.219116	2.99213	2.29308	0.026358	0.513692
Tdp1	12	99884517	99955220	+	Tdp1	protein_coding	0.181806	3.22077	2.29204	0.0264229	0.513692
D030047H15Rik	7	4126340	4136927	-	D030047H15Rik	antisense	0.342894	3.07336	2.29175	0.0264411	0.513692
Igsf9b	9	27299204	27357547	+	Igsf9b	protein_coding	0.490693	6.88127	2.29146	0.0264589	0.513692
Rbp1	9	98422961	98446576	+	Rbp1	protein_coding	-0.292726	3.51216	-2.29102	0.0264865	0.513692
Idi1	13	8885501	8892452	+	Idi1	protein_coding	-0.229282	5.28948	-2.29099	0.0264882	0.513692
Napsa	7	44572380	44586863	+	Napsa	protein_coding	0.100375	0.374561	2.29071	0.0265059	0.513692
Pcdhgc5	18	37819513	37841874	+	Pcdhgc5	protein_coding	0.258294	7.95652	2.29021	0.026537	0.513692
Fyttd1	16	32877500	32908876	+	Fyttd1	protein_coding	-0.151925	6.74018	-2.28967	0.026571	0.513692
Cbfa2t2	2	154436481	154539357	+	Cbfa2t2	protein_coding	0.156877	6.18284	2.28883	0.026624	0.513692
Prlr	15	10177238	10349181	+	Prlr	protein_coding	-0.67439	1.99765	-2.28784	0.026686	0.513692
Abi3bp	16	56477878	56690136	+	Abi3bp	protein_coding	0.4822	3.30206	2.28748	0.0267087	0.513692
Znfx1	2	167035793	167063016	-	Znfx1	protein_coding	0.265522	6.54969	2.28715	0.0267297	0.513692
Irgq	7	24530689	24538601	+	Irgq	protein_coding	0.28699	7.23314	2.287	0.026739	0.513692
Taf13	3	108571698	108583223	+	Taf13	protein_coding	-0.206471	4.72354	-2.28642	0.0267756	0.513692
Sc5d	9	42251595	42264257	-	Sc5d	protein_coding	-0.161889	6.10048	-2.28611	0.0267953	0.513692
Iglon5	7	43472904	43490076	-	Iglon5	protein_coding	0.230968	5.44243	2.28516	0.0268555	0.513692
Zbtb49	5	38189735	38220458	-	Zbtb49	protein_coding	0.25312	2.75241	2.28507	0.0268611	0.513692
Tspan2	3	102734529	102801514	+	Tspan2	protein_coding	-0.177669	7.16658	-2.28461	0.0268903	0.513692
Samd4b	7	28399522	28598145	-	Samd4b	protein_coding	0.272174	5.92906	2.28445	0.0269	0.513692
Med13l	5	118560679	118765439	+	Med13l	protein_coding	0.299426	6.78816	2.28323	0.0269779	0.513692
Fam160b2	14	70583296	70599836	-	Fam160b2	protein_coding	0.221491	5.71531	2.2821	0.0270497	0.513692
Adat3	10	80602880	80607655	+	Adat3	protein_coding	0.216772	1.06478	2.28208	0.0270508	0.513692
Farp1	14	121035200	121283745	+	Farp1	protein_coding	0.213361	5.84571	2.28137	0.0270964	0.513692
Trank1	9	111311739	111395776	+	Trank1	protein_coding	0.405179	8.54642	2.27943	0.0272203	0.513692
Med21	6	146642547	146650733	+	Med21	protein_coding	-0.302007	4.69962	-2.27882	0.0272594	0.513692
Nsa2	13	97129424	97137938	-	Nsa2	protein_coding	-0.296552	4.38327	-2.27827	0.0272943	0.513692
Adarb2	13	8202866	8768748	+	Adarb2	protein_coding	0.179957	4.2419	2.27812	0.0273045	0.513692
Sec22c	9	121680045	121705491	-	Sec22c	protein_coding	0.21208	5.88992	2.278	0.0273119	0.513692
Immp1l	2	105904638	105965559	+	Immp1l	protein_coding	-0.257905	2.47239	-2.27785	0.0273216	0.513692
Kmt2e	5	23434441	23504236	+	Kmt2e	protein_coding	0.218792	6.79961	2.27739	0.027351	0.513692
Mex3d	10	80380355	80387660	-	Mex3d	protein_coding	0.223376	3.25727	2.27708	0.0273711	0.513692
Slc6a7	18	60995381	61014200	-	Slc6a7	protein_coding	0.25834	6.24557	2.277	0.0273765	0.513692
Ap2a2	7	141562173	141633012	+	Ap2a2	protein_coding	0.113907	7.76176	2.27625	0.0274246	0.513692
Col6a2	10	76595762	76623631	-	Col6a2	protein_coding	0.335448	4.05375	2.27591	0.0274465	0.513692
Icmt	4	152297227	152307122	+	Icmt	protein_coding	0.21602	6.36286	2.27521	0.0274917	0.513692
Nfic	10	81396186	81455636	-	Nfic	protein_coding	0.349364	7.07336	2.27496	0.0275083	0.513692
Ubap2l	3	90000140	90052629	-	Ubap2l	protein_coding	0.195973	6.49799	2.27426	0.0275531	0.513692
Sema6a	18	47235598	47368871	-	Sema6a	protein_coding	0.241879	4.66877	2.27396	0.0275726	0.513692
Nap1l3	X	122394565	122397402	-	Nap1l3	protein_coding	-0.192746	6.23018	-2.27321	0.0276214	0.513692
Setd1a	7	127776670	127800123	+	Setd1a	protein_coding	0.310918	5.82188	2.27302	0.027634	0.513692
Mtmr12	15	12205028	12274497	+	Mtmr12	protein_coding	0.21885	5.68212	2.27286	0.0276443	0.513692
9230116N13Rik	1	136411916	136415520	-	9230116N13Rik	processed_transcript	-0.196883	0.518181	-2.27278	0.0276492	0.513692
Zmynd8	2	165784152	165899017	-	Zmynd8	protein_coding	0.240849	6.77595	2.27229	0.0276809	0.513692
Baz2a	10	128091577	128129304	+	Baz2a	protein_coding	0.243115	5.63462	2.27161	0.0277253	0.513692
Rasa3	8	13566948	13677604	-	Rasa3	protein_coding	0.107192	6.35074	2.27141	0.0277388	0.513692
Ppp1r2	16	31251537	31275278	-	Ppp1r2	protein_coding	-0.202473	7.04405	-2.27118	0.0277534	0.513692
Slc25a17	15	81318911	81360813	-	Slc25a17	protein_coding	-0.153211	5.25368	-2.27113	0.0277565	0.513692
Neurl1a	19	47178820	47259441	+	Neurl1a	protein_coding	0.259481	7.4665	2.27104	0.0277629	0.513692
Tmem145	7	25306106	25316196	+	Tmem145	protein_coding	0.353737	4.32344	2.27032	0.0278093	0.513692
Igbp1	X	100494291	100516126	+	Igbp1	protein_coding	-0.186521	5.3341	-2.26912	0.0278882	0.513692
Tubgcp2	7	139995955	140036670	-	Tubgcp2	protein_coding	0.142253	5.2418	2.26873	0.0279134	0.513692
Rad54l2	9	106688082	106789195	-	Rad54l2	protein_coding	0.371052	5.08667	2.26835	0.0279384	0.513692
Rpa1	11	75298166	75348325	-	Rpa1	protein_coding	-0.149946	5.44102	-2.26732	0.0280061	0.513692
9530068E07Rik	11	52396428	52408729	+	9530068E07Rik	protein_coding	-0.112173	6.55176	-2.26713	0.0280186	0.513692
Syn1	X	20860511	20921005	-	Syn1	protein_coding	0.378707	9.4316	2.26678	0.0280414	0.513692
Rasal1	5	120648812	120679598	+	Rasal1	protein_coding	0.269455	5.98485	2.26664	0.0280508	0.513692
Wwtr1	3	57455649	57575911	-	Wwtr1	protein_coding	-0.175516	4.58178	-2.2666	0.0280535	0.513692
Wbp2	11	116078573	116086996	-	Wbp2	protein_coding	0.212508	8.75267	2.2664	0.0280666	0.513692
Shank3	15	89499623	89560262	+	Shank3	protein_coding	0.394522	7.12147	2.26582	0.0281052	0.513692
Smim10l1	6	133104909	133110900	+	Smim10l1	protein_coding	-0.174388	7.96626	-2.26563	0.0281175	0.513692
Jag2	12	112907819	112929777	-	Jag2	protein_coding	0.347143	4.07718	2.26499	0.0281596	0.513692
Lrrc47	4	154011731	154021514	+	Lrrc47	protein_coding	0.266516	5.62389	2.26484	0.0281697	0.513692
Mllt6	11	97663414	97685464	+	Mllt6	protein_coding	0.25046	7.30769	2.26331	0.0282707	0.513692
Tbc1d5	17	50733124	51179353	-	Tbc1d5	protein_coding	0.23473	5.53202	2.2623	0.0283375	0.513692
Mrps30	13	118378381	118387253	-	Mrps30	protein_coding	-0.158778	4.48242	-2.26227	0.0283395	0.513692
Ano8	8	71476019	71485964	-	Ano8	protein_coding	0.360968	4.63753	2.26218	0.0283456	0.513692
Ddo	10	40630011	40681848	+	Ddo	protein_coding	-0.195671	3.5421	-2.26186	0.0283667	0.513692
Anxa3	5	96793339	96845967	+	Anxa3	protein_coding	-0.24653	2.7823	-2.26166	0.0283804	0.513692
Ppp1r2-ps3	19	30538928	30539555	-	Ppp1r2-ps3	processed_pseudogene	-0.202043	2.67547	-2.26146	0.0283936	0.513692
Abca2	2	25428703	25448541	+	Abca2	protein_coding	0.261543	7.84113	2.26116	0.0284138	0.513692
Mycbp	4	123904832	123912270	+	Mycbp	protein_coding	-0.247519	2.95831	-2.2611	0.0284174	0.513692
Src	2	157418444	157471863	+	Src	protein_coding	0.233058	6.66001	2.26052	0.028456	0.513692
Capza2	6	17636234	17666973	+	Capza2	protein_coding	-0.174007	8.16212	-2.26051	0.0284569	0.513692
Nfe2l1	11	96817414	96829969	-	Nfe2l1	protein_coding	0.12411	8.44144	2.26024	0.0284748	0.513692
Wiz	17	32354055	32389402	-	Wiz	protein_coding	0.371261	5.34581	2.26002	0.0284894	0.513692
Krt8	15	101996698	102004483	-	Krt8	protein_coding	-0.206461	0.38478	-2.25942	0.0285296	0.513692
Grik5	7	25009849	25072347	-	Grik5	protein_coding	0.282528	7.07675	2.25931	0.0285367	0.513692
Serp1	3	58519817	58525893	-	Serp1	protein_coding	-0.227535	6.01824	-2.25868	0.0285788	0.513692
Man1c1	4	134561690	134704291	-	Man1c1	protein_coding	0.205121	5.46544	2.25768	0.0286459	0.513692
Szt2	4	118362743	118409274	-	Szt2	protein_coding	0.426745	4.84873	2.25632	0.0287373	0.513692
Psma6	12	55384222	55418455	+	Psma6	protein_coding	-0.210488	6.20922	-2.25564	0.028783	0.513692
Hdac5	11	102194432	102230167	-	Hdac5	protein_coding	0.238713	6.11767	2.25478	0.0288412	0.513692
Clic6	16	92485736	92541244	+	Clic6	protein_coding	-0.674895	2.98667	-2.25421	0.0288797	0.513692
Map7d1	4	126232167	126256344	-	Map7d1	protein_coding	0.230376	7.22962	2.25225	0.0290122	0.513692
C2cd2l	9	44309237	44320286	-	C2cd2l	protein_coding	0.234263	7.12996	2.25145	0.0290662	0.513692
Ddx25	9	35536647	35558529	-	Ddx25	protein_coding	-0.122905	5.59086	-2.2514	0.02907	0.513692
Ptpmt1	2	90908716	90918259	-	Ptpmt1	processed_transcript	-0.222604	5.09587	-2.2507	0.0291172	0.513692
Slc38a9	13	112660751	112738750	+	Slc38a9	protein_coding	0.256706	4.90891	2.25051	0.0291301	0.513692
Rgl1	1	152516760	152766352	-	Rgl1	protein_coding	0.241308	6.62642	2.25025	0.0291479	0.513692
Cnn3	3	121426497	121458208	+	Cnn3	protein_coding	-0.148549	5.77133	-2.25016	0.0291542	0.513692
Nek7	1	138482875	138620142	-	Nek7	protein_coding	-0.214818	6.3173	-2.25011	0.0291577	0.513692
Fam234b	6	135197977	135244956	+	Fam234b	protein_coding	0.167707	8.54741	2.25011	0.0291579	0.513692
Cops2	2	125830304	125859140	-	Cops2	protein_coding	-0.180558	6.83966	-2.25004	0.0291626	0.513692
Tssk4	14	55650184	55652540	+	Tssk4	protein_coding	0.114435	0.487129	2.25	0.0291649	0.513692
Msmo1	8	64718139	64733793	-	Msmo1	protein_coding	-0.16841	6.86767	-2.24984	0.029176	0.513692
Ndufc1	3	51404677	51408989	-	Ndufc1	protein_coding	-0.292802	4.09633	-2.24961	0.0291918	0.513692
Pip5k1c	10	81292963	81319974	+	Pip5k1c	protein_coding	0.230366	8.75868	2.24956	0.0291951	0.513692
Gm16982	7	141610066	141613748	-	Gm16982	antisense	0.191037	1.43437	2.24929	0.0292135	0.513692
Slc45a1	4	150628572	150652175	-	Slc45a1	protein_coding	0.223655	5.79813	2.24928	0.0292145	0.513692
Kif3c	12	3365132	3406495	+	Kif3c	protein_coding	0.181729	8.29821	2.24813	0.0292926	0.513692
Coro2b	9	62419492	62537045	-	Coro2b	protein_coding	0.325785	7.77447	2.24756	0.0293321	0.513692
Runx1t1	4	13743436	13893650	+	Runx1t1	protein_coding	0.183212	5.0166	2.24717	0.0293585	0.513692
Srrm4	5	116439275	116591818	-	Srrm4	protein_coding	0.347377	5.62982	2.24696	0.0293732	0.513692
Mpc1	17	8282904	8297662	+	Mpc1	protein_coding	-0.235458	6.14398	-2.24691	0.0293764	0.513692
Sema6b	17	56123085	56140344	-	Sema6b	protein_coding	0.240499	5.99673	2.2467	0.0293906	0.513692
Rbx1	15	81466296	81476370	+	Rbx1	protein_coding	-0.121033	6.51522	-2.24602	0.0294374	0.513692
A230077H06Rik	7	40818476	40900938	-	A230077H06Rik	antisense	0.155387	2.82399	2.24566	0.0294619	0.513692
Wdtc1	4	133292459	133353482	-	Wdtc1	protein_coding	0.284756	6.0111	2.24527	0.0294888	0.513692
Tmem17	11	22512088	22519235	+	Tmem17	protein_coding	-0.213568	3.2588	-2.24515	0.0294975	0.513692
B230118H07Rik	2	101560781	101649533	-	B230118H07Rik	protein_coding	-0.181234	4.2146	-2.24505	0.0295043	0.513692
Wls	3	159839672	159938665	+	Wls	protein_coding	-0.18899	5.43548	-2.24275	0.0296628	0.513692
Clcn6	4	148004259	148038822	-	Clcn6	protein_coding	0.238142	6.85182	2.24263	0.0296711	0.513692
Ndufa5	6	24518666	24528014	-	Ndufa5	protein_coding	-0.242676	5.25552	-2.24259	0.0296742	0.513692
Bcap29	12	31590967	31634659	-	Bcap29	protein_coding	-0.224285	5.79093	-2.24255	0.0296765	0.513692
Calml4	9	62858080	62875922	+	Calml4	protein_coding	-0.331219	1.01917	-2.24238	0.0296883	0.513692
Cdh13	8	118283733	119324922	+	Cdh13	protein_coding	0.209677	6.72542	2.2421	0.0297078	0.513692
Spag16	1	69826970	70725133	+	Spag16	protein_coding	-0.286488	0.971212	-2.24201	0.0297144	0.513692
Rps27l	9	66946086	66949517	+	Rps27l	protein_coding	-0.226419	2.36025	-2.24186	0.0297244	0.513692
Mrps34	17	24895116	24897503	+	Mrps34	protein_coding	-0.190968	4.90042	-2.24087	0.0297933	0.513692
Cit	5	115845278	116008948	+	Cit	protein_coding	0.4123	5.99831	2.24073	0.029803	0.513692
Hist1h2bh	13	23541714	23543393	-	Hist1h2bh	protein_coding	-0.206259	0.893927	-2.2403	0.0298329	0.513692
Pde6d	1	86542994	86582630	-	Pde6d	protein_coding	-0.175262	5.29968	-2.24028	0.0298341	0.513692
Aldh1a1	19	20492715	20643463	+	Aldh1a1	protein_coding	-0.253986	5.02644	-2.2386	0.0299512	0.515185
Camsap1	2	25926838	25983283	-	Camsap1	protein_coding	0.208205	6.54222	2.2374	0.0300349	0.515663
0610012G03Rik	16	31947050	31948495	-	0610012G03Rik	protein_coding	-0.20426	5.36587	-2.2362	0.030119	0.515663
Psme2	14	55587441	55591114	-	Psme2	protein_coding	-0.235227	1.75841	-2.23617	0.0301208	0.515663
Emp1	6	135362545	135383174	+	Emp1	protein_coding	-0.234239	1.42815	-2.23616	0.0301218	0.515663
Pdhb	14	8165996	8173026	-	Pdhb	protein_coding	-0.169778	6.6037	-2.23583	0.0301452	0.515663
Mlc1	15	88955884	88979008	-	Mlc1	protein_coding	-0.136714	7.39199	-2.235	0.0302032	0.515663
Sik3	9	46012820	46224195	+	Sik3	protein_coding	0.266888	6.94848	2.23466	0.0302268	0.515663
Commd8	5	72156575	72168190	-	Commd8	protein_coding	-0.197811	5.47228	-2.23451	0.0302377	0.515663
Trerf1	17	47140875	47361959	+	Trerf1	processed_transcript	0.358784	4.94012	2.23384	0.0302845	0.515663
Swi5	2	32278816	32288076	-	Swi5	protein_coding	-0.178018	6.08095	-2.23384	0.0302849	0.515663
Cep250	2	155956458	155998901	+	Cep250	protein_coding	0.367241	4.6944	2.23343	0.0303134	0.515663
Pde4dip	3	97689824	97888708	-	Pde4dip	protein_coding	0.187417	7.47958	2.23209	0.0304085	0.516233
Trim32	4	65604986	65616239	+	Trim32	protein_coding	0.14755	7.77699	2.23179	0.0304295	0.516233
Mfsd12	10	81357491	81366226	+	Mfsd12	protein_coding	0.224866	3.60108	2.23167	0.0304382	0.516233
Ep300	15	81585351	81652078	+	Ep300	protein_coding	0.240159	6.21532	2.23039	0.0305285	0.516362
Sf3a2	10	80798198	80804925	+	Sf3a2	protein_coding	0.383716	4.18969	2.23021	0.0305417	0.516362
Zbed3	13	95323612	95337842	+	Zbed3	protein_coding	0.217023	3.8342	2.22887	0.0306371	0.516362
Bcl6	16	23965052	23988853	-	Bcl6	protein_coding	0.162418	5.09227	2.22817	0.0306869	0.516362
Gsta4	9	78182774	78209350	+	Gsta4	protein_coding	-0.196175	4.972	-2.22764	0.0307247	0.516362
Arhgap10	8	77250366	77517954	-	Arhgap10	protein_coding	0.162784	4.49314	2.22761	0.0307264	0.516362
Iba57	11	59155369	59163740	-	Iba57	protein_coding	0.159582	3.22284	2.22759	0.0307282	0.516362
Mrpl35	6	71812997	71826970	-	Mrpl35	protein_coding	-0.155727	5.13676	-2.22698	0.0307718	0.516362
Foxo3	10	42181841	42276756	-	Foxo3	protein_coding	0.391708	5.50233	2.22694	0.0307743	0.516362
Rfesd	13	76001535	76018720	-	Rfesd	protein_coding	-0.22241	3.58066	-2.22654	0.0308032	0.516362
Sp2	11	96953341	96982960	-	Sp2	protein_coding	0.271653	4.17053	2.22583	0.0308535	0.516362
Ctso	3	81932601	81956726	+	Ctso	protein_coding	-0.219119	5.61213	-2.2253	0.0308916	0.516362
Kri1	9	21273457	21287970	-	Kri1	protein_coding	0.253132	4.26916	2.22495	0.0309172	0.516362
5830417I10Rik	3	88775216	88825588	+	5830417I10Rik	unprocessed_pseudogene	0.24425	5.39634	2.22463	0.03094	0.516362
Dcaf7	11	106036872	106059325	+	Dcaf7	protein_coding	0.220955	8.2003	2.22452	0.030948	0.516362
Efcab10	12	33394854	33401268	+	Efcab10	protein_coding	-0.27452	1.00423	-2.22439	0.0309574	0.516362
Rps26	10	128624534	128626748	-	Rps26	protein_coding	-0.227021	4.13933	-2.22314	0.0310469	0.516362
Rpl30	15	34440505	34443641	-	Rpl30	protein_coding	-0.386112	4.99977	-2.2231	0.0310495	0.516362
Sprn	7	140150628	140154878	-	Sprn	protein_coding	0.219775	7.97151	2.2229	0.031064	0.516362
Zfp408	2	91643669	91649792	-	Zfp408	protein_coding	0.189292	3.82208	2.22254	0.03109	0.516362
Gngt2	11	95837216	95845735	+	Gngt2	protein_coding	-0.321342	1.65705	-2.22218	0.0311165	0.516362
Kirrel3	9	34485894	35036717	+	Kirrel3	protein_coding	0.186041	5.39143	2.22183	0.0311415	0.516362
Dstn	2	143915320	143943325	+	Dstn	protein_coding	-0.157571	7.6205	-2.22176	0.0311462	0.516362
Polr2a	11	69733997	69758638	-	Polr2a	protein_coding	0.344711	6.45349	2.22011	0.0312656	0.517774
Ablim3	18	61799395	61911853	-	Ablim3	protein_coding	0.208829	5.11621	2.21974	0.0312924	0.517774
Fkbp3	12	65062424	65074008	-	Fkbp3	protein_coding	-0.225884	6.647	-2.21927	0.0313269	0.517786
Nck1	9	100492293	100546135	-	Nck1	protein_coding	-0.2089	4.57697	-2.21849	0.0313832	0.517786
Mast2	4	116306762	116464184	-	Mast2	protein_coding	0.30928	6.8831	2.21847	0.0313846	0.517786
Asb1	1	91540544	91559590	+	Asb1	protein_coding	0.176008	6.22736	2.21799	0.0314194	0.517856
Nell2	15	95075230	95528560	-	Nell2	protein_coding	0.181387	8.82788	2.21756	0.0314509	0.517872
Col6a1	10	76708792	76726169	-	Col6a1	protein_coding	0.372528	6.05969	2.21673	0.0315118	0.518098
Dnaja2	8	85537633	85555345	-	Dnaja2	protein_coding	-0.169476	7.86993	-2.21654	0.0315258	0.518098
Mgat4b	11	50210890	50235104	+	Mgat4b	protein_coding	0.186697	5.00857	2.21604	0.0315623	0.518106
Calcoco1	15	102706777	102722179	-	Calcoco1	protein_coding	0.154185	6.22016	2.21569	0.0315874	0.518106
Sugp2	8	70234226	70279916	+	Sugp2	protein_coding	0.196461	6.31349	2.21454	0.0316715	0.518222
Plbd2	5	120483282	120503626	-	Plbd2	protein_coding	0.255531	6.46455	2.21417	0.0316987	0.518222
Nav2	7	48908716	49610091	+	Nav2	protein_coding	0.408657	5.85072	2.21407	0.0317064	0.518222
Clec5a	6	40574894	40585822	-	Clec5a	protein_coding	-0.335323	1.7384	-2.21319	0.0317707	0.518222
Diaph1	18	37843601	37935477	-	Diaph1	protein_coding	0.160434	5.91128	2.21294	0.0317892	0.518222
Pde4a	9	21165714	21213249	+	Pde4a	protein_coding	0.262995	7.1894	2.21282	0.0317978	0.518222
Syt17	7	118380717	118448223	-	Syt17	protein_coding	0.317598	5.01851	2.21227	0.0318384	0.518222
Spns2	11	72451638	72489905	-	Spns2	protein_coding	0.168916	5.7804	2.21197	0.0318604	0.518222
Nadk2	15	9071260	9110892	+	Nadk2	protein_coding	-0.187541	5.30392	-2.21098	0.0319337	0.518222
Cbarp	10	80130451	80140836	-	Cbarp	protein_coding	0.280806	7.27313	2.21097	0.0319342	0.518222
Unc13b	4	43058953	43264872	+	Unc13b	protein_coding	0.306069	5.52853	2.21082	0.0319456	0.518222
Dpy30	17	74299474	74323945	-	Dpy30	protein_coding	-0.208993	4.03839	-2.21011	0.0319981	0.518222
Kcnf1	12	17172100	17176889	-	Kcnf1	protein_coding	0.20771	7.46348	2.20897	0.032082	0.518222
Hivep3	4	119733784	120138046	+	Hivep3	protein_coding	0.612597	5.60337	2.20861	0.0321094	0.518222
Apba2	7	64501706	64753879	+	Apba2	protein_coding	0.174935	7.45062	2.2086	0.0321095	0.518222
Map7	10	20148471	20281591	+	Map7	protein_coding	0.140687	6.4981	2.20705	0.0322252	0.518222
Spata2l	8	123229801	123236234	-	Spata2l	protein_coding	0.284015	5.67582	2.20677	0.0322462	0.518222
Ulk3	9	57589452	57596234	+	Ulk3	protein_coding	0.264964	4.17301	2.20659	0.0322594	0.518222
Ncoa6	2	155390656	155473895	-	Ncoa6	protein_coding	0.244249	6.68157	2.20575	0.032322	0.518222
Rpl22l1	3	28805436	28807425	+	Rpl22l1	protein_coding	-0.396341	4.38167	-2.20574	0.032323	0.518222
Rpl9	5	65388364	65391445	-	Rpl9	protein_coding	-0.310067	4.00259	-2.20561	0.0323323	0.518222
Arhgap44	11	65002039	65162962	-	Arhgap44	protein_coding	0.129572	7.0363	2.20553	0.0323382	0.518222
Gm7457	6	142814231	142833495	+	Gm7457	processed_transcript	0.109219	0.16831	2.20516	0.0323657	0.518222
Adcy6	15	98589973	98610077	-	Adcy6	protein_coding	0.276856	5.39243	2.20512	0.0323691	0.518222
Zscan25	5	145280500	145291279	+	Zscan25	protein_coding	0.230601	3.28907	2.20504	0.0323749	0.518222
Fabp5	3	10012548	10016608	+	Fabp5	protein_coding	-0.212761	4.98674	-2.20485	0.0323889	0.518222
Sec61a1	6	88503579	88518906	-	Sec61a1	protein_coding	0.114002	6.24089	2.204	0.0324524	0.518332
Lyst	13	13590397	13778804	+	Lyst	protein_coding	0.364223	5.96668	2.20394	0.0324569	0.518332
Xylt2	11	94663851	94677516	-	Xylt2	protein_coding	0.201086	4.63288	2.20252	0.0325639	0.519325
Rab11fip3	17	25989036	26069410	-	Rab11fip3	protein_coding	0.265231	6.73433	2.2023	0.0325803	0.519325
Tmsb4x	X	167207093	167209316	-	Tmsb4x	protein_coding	-0.248484	9.45765	-2.20175	0.0326213	0.519465
1700021N21Rik	4	134448766	134450172	-	1700021N21Rik	antisense	-0.190502	0.756103	-2.20065	0.0327045	0.519465
Serpinb1a	13	32842092	32851186	-	Serpinb1a	protein_coding	-0.251814	3.83672	-2.20065	0.0327049	0.519465
Rai1	11	60105013	60199198	+	Rai1	protein_coding	0.33165	6.00776	2.20053	0.0327136	0.519465
Fbln2	6	91212455	91272541	+	Fbln2	protein_coding	0.279104	2.56098	2.19915	0.0328176	0.519465
Atp6v0a1	11	101009452	101063720	+	Atp6v0a1	protein_coding	0.342485	8.61278	2.19885	0.0328403	0.519465
Psmd6	14	14112174	14120985	-	Psmd6	protein_coding	-0.212692	5.63087	-2.19867	0.032854	0.519465
Epb41l1	2	156420909	156543215	+	Epb41l1	protein_coding	0.198015	8.90171	2.19826	0.0328853	0.519465
Rasd2	8	75213944	75224114	+	Rasd2	protein_coding	0.388751	7.98541	2.19812	0.0328956	0.519465
Arhgap20os	9	51832814	51875887	-	Arhgap20os	antisense	0.215029	0.82963	2.19802	0.0329034	0.519465
Cd53	3	106759921	106790150	-	Cd53	protein_coding	-0.282846	3.56175	-2.19772	0.032926	0.519465
Mllt1	17	56892611	56935416	-	Mllt1	protein_coding	0.202684	6.51593	2.19608	0.0330507	0.520603
Pelp1	11	70392883	70410032	-	Pelp1	protein_coding	0.176731	5.04676	2.19582	0.0330709	0.520603
Opalin	19	41062474	41077114	-	Opalin	protein_coding	-0.263079	4.79655	-2.19468	0.0331574	0.520603
Actn1	12	80167547	80260372	-	Actn1	protein_coding	0.234107	6.26187	2.19422	0.0331923	0.520603
Ogn	13	49608046	49624502	+	Ogn	protein_coding	-0.501606	2.59317	-2.19385	0.033221	0.520603
Hacd1	2	13850282	14056136	-	Hacd1	protein_coding	-0.180432	1.98449	-2.19349	0.0332485	0.520603
Rhoa	9	108306129	108337935	+	Rhoa	protein_coding	-0.139529	7.08118	-2.19334	0.0332601	0.520603
Pskh1	8	105900441	105931779	+	Pskh1	protein_coding	0.206651	3.90712	2.19319	0.0332711	0.520603
Hgs	11	120467635	120483985	+	Hgs	protein_coding	0.214044	5.26798	2.19302	0.0332842	0.520603
Zmiz2	11	6389074	6406159	+	Zmiz2	protein_coding	0.30983	7.68891	2.19137	0.0334108	0.520603
Gm8624	11	117420637	117421718	-	Gm8624	transcribed_processed_pseudogene	-0.274732	3.03632	-2.19128	0.0334178	0.520603
Robo3	9	37415669	37433247	-	Robo3	protein_coding	0.46539	4.03209	2.19113	0.0334296	0.520603
Lpar1	4	58435255	58553899	-	Lpar1	protein_coding	-0.23831	5.59859	-2.19082	0.0334529	0.520603
Sptb	12	76580488	76710548	-	Sptb	protein_coding	0.339563	7.59417	2.19041	0.0334849	0.520603
Tfb2m	1	179528055	179546268	-	Tfb2m	protein_coding	-0.1577	4.32253	-2.19013	0.0335067	0.520603
Pcdhgb1	18	37680233	37841871	+	Pcdhgb1	protein_coding	0.367777	4.18464	2.19009	0.0335095	0.520603
Tmco1	1	167308378	167333979	+	Tmco1	protein_coding	-0.201544	5.01731	-2.18995	0.0335199	0.520603
Caskin1	17	24488783	24508906	+	Caskin1	protein_coding	0.295996	6.94546	2.18917	0.0335801	0.521061
Nvl	1	181087138	181144205	-	Nvl	protein_coding	0.190569	5.7401	2.18785	0.0336821	0.522164
Ttll12	15	83575090	83595158	-	Ttll12	protein_coding	0.179896	4.13706	2.18717	0.0337347	0.522179
Slc10a5	3	10331734	10335657	-	Slc10a5	protein_coding	0.0976192	0.211703	2.18567	0.0338517	0.522179
Serpinb6b	13	32965209	32979068	+	Serpinb6b	protein_coding	-0.254884	1.15355	-2.18536	0.0338754	0.522179
Pgs1	11	117986292	118024012	+	Pgs1	protein_coding	0.114699	6.40365	2.18527	0.0338828	0.522179
Arhgef11	3	87617559	87738035	+	Arhgef11	protein_coding	0.260732	6.02611	2.18474	0.0339241	0.522179
F930015N05Rik	11	64435156	64436654	-	F930015N05Rik	protein_coding	0.128724	1.21203	2.18469	0.033928	0.522179
Rab1a	11	20201432	20226857	+	Rab1a	protein_coding	-0.150391	8.08653	-2.18453	0.0339399	0.522179
F5	1	164151838	164220278	+	F5	protein_coding	-0.591541	1.55839	-2.1843	0.0339584	0.522179
Prrc1	18	57354733	57392720	+	Prrc1	protein_coding	0.141699	4.62766	2.18427	0.0339602	0.522179
Brd4	17	32196274	32284723	-	Brd4	protein_coding	0.262762	6.05596	2.18388	0.0339909	0.522179
Rptoros	11	119820812	119834366	-	Rptoros	antisense	0.132533	0.327606	2.18268	0.0340843	0.522866
Ugp2	11	21321138	21371202	-	Ugp2	protein_coding	-0.20038	6.46278	-2.18165	0.0341655	0.522866
4933404O12Rik	5	136919146	136937113	+	4933404O12Rik	lincRNA	0.158725	4.34995	2.18138	0.0341862	0.522866
Lox	18	52516069	52529868	-	Lox	protein_coding	-0.203542	0.486818	-2.18121	0.0341998	0.522866
Cycs	6	50562563	50566539	-	Cycs	protein_coding	-0.213768	6.6513	-2.18059	0.0342483	0.522866
Insc	7	114743694	114850384	+	Insc	protein_coding	-0.237416	2.25467	-2.18023	0.0342764	0.522866
Inppl1	7	101822632	101838230	-	Inppl1	protein_coding	0.230382	4.81053	2.17997	0.0342974	0.522866
Fmnl1	11	103171107	103198902	+	Fmnl1	protein_coding	0.351133	6.21082	2.17984	0.0343073	0.522866
Cacna1g	11	94408391	94474199	-	Cacna1g	protein_coding	0.368025	5.49965	2.17958	0.0343277	0.522866
Cpne5	17	29156550	29237798	-	Cpne5	protein_coding	0.33801	6.63014	2.17912	0.034364	0.522866
Foxj2	6	122819914	122845367	+	Foxj2	protein_coding	0.223402	5.55296	2.17897	0.0343758	0.522866
Ephx2	14	66084374	66124501	-	Ephx2	protein_coding	-0.218432	4.07332	-2.17846	0.034416	0.522866
Ybx2	11	69935796	69941606	+	Ybx2	protein_coding	0.207474	1.45787	2.1782	0.0344364	0.522866
Zmiz1	14	25459185	25666744	+	Zmiz1	protein_coding	0.302595	7.30439	2.17755	0.0344877	0.522924
Agpat3	10	78269178	78352490	-	Agpat3	protein_coding	0.135697	7.79625	2.17737	0.0345021	0.522924
Cyb5a	18	84851338	84880402	+	Cyb5a	protein_coding	-0.182481	5.77768	-2.17683	0.0345446	0.522924
Plac9a	14	25887506	25903101	-	Plac9a	protein_coding	-0.217795	0.815493	-2.17642	0.0345771	0.522924
Scamp4	10	80602872	80615784	+	Scamp4	protein_coding	0.231468	5.73858	2.1762	0.0345944	0.522924
Klc2	19	5107746	5118561	-	Klc2	protein_coding	0.192588	7.74159	2.17544	0.0346547	0.523369
Mdn1	4	32657119	32775218	+	Mdn1	protein_coding	0.350165	5.46243	2.17473	0.0347113	0.523692
Gm6588	5	112449426	112451739	+	Gm6588	protein_coding	0.127207	0.286354	2.17439	0.0347381	0.523692
Yes1	5	32611171	32687058	+	Yes1	protein_coding	-0.193694	4.00699	-2.17344	0.034814	0.523692
Tmed2	5	124540695	124550507	+	Tmed2	protein_coding	-0.168094	6.13445	-2.1725	0.0348895	0.523692
Nav1	1	135434580	135607296	-	Nav1	protein_coding	0.359731	6.7089	2.17213	0.0349189	0.523692
Bahd1	2	118900377	118924529	+	Bahd1	protein_coding	0.22658	5.60923	2.17191	0.0349361	0.523692
2900052N01Rik	9	46913493	46927367	+	2900052N01Rik	lincRNA	-0.27287	5.6149	-2.17173	0.0349508	0.523692
Fam189b	3	89183143	89189296	+	Fam189b	protein_coding	0.254964	5.00577	2.17147	0.034971	0.523692
Raver1	9	21074158	21092009	-	Raver1	protein_coding	0.3978	5.06061	2.17111	0.0350002	0.523692
Rnf165	18	77456110	77565148	-	Rnf165	protein_coding	0.364692	5.93997	2.17093	0.0350143	0.523692
Rpl17	18	75000477	75003382	+	Rpl17	protein_coding	-0.303733	4.07641	-2.1707	0.0350328	0.523692
Whamm	7	81571266	81596837	+	Whamm	protein_coding	0.189438	4.3583	2.16962	0.0351194	0.523692
Dbn1	13	55473429	55488112	-	Dbn1	protein_coding	0.197216	7.35932	2.16941	0.0351367	0.523692
Glt1d1	5	127632262	127709375	+	Glt1d1	protein_coding	0.125079	4.29811	2.16921	0.0351526	0.523692
Msi1	5	115429599	115455699	+	Msi1	protein_coding	0.242911	3.04485	2.16917	0.0351557	0.523692
Setd5	6	113077365	113153436	+	Setd5	protein_coding	0.253018	6.83182	2.16885	0.0351815	0.523692
Prr3	17	35972541	35980237	-	Prr3	protein_coding	0.166526	4.63272	2.16861	0.035201	0.523692
Dync1h1	12	110601452	110666946	+	Dync1h1	protein_coding	0.262851	9.15781	2.16547	0.0354541	0.526502
Arid5b	10	68092520	68278741	-	Arid5b	protein_coding	0.346034	4.78075	2.1653	0.0354683	0.526502
Aff3	1	38177326	38664956	-	Aff3	protein_coding	0.188959	6.01773	2.16445	0.0355374	0.526502
Uqcrb	13	66900617	66905379	-	Uqcrb	protein_coding	-0.271787	4.87243	-2.16444	0.0355375	0.526502
Klhl26	8	70450219	70476969	-	Klhl26	protein_coding	0.19805	5.72466	2.16408	0.0355672	0.526502
C2cd5	6	143010920	143100142	-	C2cd5	protein_coding	0.234656	5.64009	2.16335	0.0356267	0.526502
Sub1	15	11981339	11996984	-	Sub1	protein_coding	-0.180356	7.87484	-2.16323	0.0356359	0.526502
Rxra	2	27676440	27762958	+	Rxra	protein_coding	0.216645	5.38226	2.16169	0.0357613	0.526502
Ensa	3	95624993	95632103	+	Ensa	protein_coding	-0.13103	8.39934	-2.16142	0.035784	0.526502
Eif4g1	16	20668313	20692885	+	Eif4g1	protein_coding	0.212992	7.0484	2.16105	0.0358135	0.526502
Csnk1d	11	120961749	120991331	-	Csnk1d	protein_coding	0.133173	7.20118	2.16044	0.0358639	0.526502
Prrt3	6	113493639	113501932	-	Prrt3	protein_coding	0.259601	5.34504	2.15965	0.0359281	0.526502
Abhd2	7	79273199	79365509	+	Abhd2	protein_coding	0.311665	6.25686	2.15916	0.0359684	0.526502
Sipa1l3	7	29320372	29518642	-	Sipa1l3	protein_coding	0.351357	5.08166	2.15893	0.035987	0.526502
Cplx2	13	54371349	54383918	+	Cplx2	protein_coding	0.124372	10.9787	2.15892	0.0359886	0.526502
Zfp536	7	37472135	37773642	-	Zfp536	protein_coding	0.385986	3.63916	2.15821	0.0360465	0.526502
Larp1	11	58009064	58062035	+	Larp1	protein_coding	0.218228	6.79419	2.158	0.0360638	0.526502
Ell	8	70539457	70592859	+	Ell	protein_coding	0.214446	4.36447	2.15792	0.0360704	0.526502
Pigq	17	25926421	25944511	-	Pigq	protein_coding	0.152241	6.65145	2.15593	0.0362342	0.526502
Tmem251	12	102743762	102747562	+	Tmem251	protein_coding	-0.184719	3.81131	-2.15578	0.0362466	0.526502
Jph4	14	55106826	55116936	-	Jph4	protein_coding	0.262281	8.69978	2.15568	0.036255	0.526502
Pigt	2	164497520	164508302	+	Pigt	protein_coding	0.235627	5.74202	2.15564	0.0362578	0.526502
Phf24	4	42916660	42944753	+	Phf24	protein_coding	0.241657	8.27952	2.15519	0.0362951	0.526502
Golgb1	16	36875140	36933086	+	Golgb1	protein_coding	0.278486	7.07222	2.15499	0.0363118	0.526502
Ube2d3	3	135438149	135468199	+	Ube2d3	protein_coding	-0.162453	7.56195	-2.15489	0.0363205	0.526502
Grik3	4	125490700	125714174	+	Grik3	protein_coding	0.34695	7.12852	2.15483	0.036325	0.526502
Mxd3	13	55325168	55329824	-	Mxd3	protein_coding	-0.170099	0.679748	-2.15481	0.0363266	0.526502
Dchs1	7	105752990	105787655	-	Dchs1	protein_coding	0.360125	3.92085	2.15447	0.0363549	0.526502
Tubb4a	17	57080066	57087783	-	Tubb4a	protein_coding	0.224216	10.2715	2.15393	0.0363996	0.526502
Gramd2	9	59680144	59718875	+	Gramd2	protein_coding	0.221716	2.54287	2.15391	0.0364013	0.526502
Atp5f1	3	105942698	105960100	-	Atp5f1	protein_coding	-0.250453	6.72581	-2.15389	0.0364034	0.526502
Zfp651	9	121759330	121771743	+	Zfp651	protein_coding	0.213275	6.29278	2.1538	0.0364106	0.526502
Pon3	6	5220852	5256287	-	Pon3	protein_coding	-0.268271	1.40224	-2.15375	0.0364148	0.526502
Jup	11	100368958	100397764	-	Jup	protein_coding	0.224119	5.44014	2.15338	0.0364454	0.526502
Tet3	6	83362373	83459085	-	Tet3	protein_coding	0.36456	5.84866	2.15289	0.0364857	0.52661
Vps9d1	8	123242356	123254349	-	Vps9d1	protein_coding	0.225747	5.13354	2.15116	0.03663	0.52661
Kcnt1	2	25863734	25918274	+	Kcnt1	protein_coding	0.207787	6.87824	2.15109	0.0366354	0.52661
Mboat7	7	3677789	3693524	-	Mboat7	protein_coding	0.12723	6.91864	2.15048	0.0366867	0.52661
Slc39a8	3	135825279	135888573	+	Slc39a8	protein_coding	-0.245331	2.1715	-2.14976	0.0367467	0.52661
Mn1	5	111417362	111457034	+	Mn1	protein_coding	0.308013	5.39786	2.14969	0.0367525	0.52661
Celf3	3	94478295	94492199	+	Celf3	protein_coding	0.294665	6.64992	2.14937	0.0367797	0.52661
Ampd2	3	108074062	108086652	-	Ampd2	protein_coding	0.224135	5.63714	2.14933	0.036783	0.52661
Gm9573	17	35617923	35626638	-	Gm9573	protein_coding	0.0930298	0.153598	2.14923	0.0367913	0.52661
Trim41	11	48806404	48817354	-	Trim41	protein_coding	0.131876	5.99036	2.14843	0.0368578	0.52661
Incenp	19	9872297	9899534	-	Incenp	protein_coding	0.163773	4.34536	2.14823	0.0368743	0.52661
Cdk5r2	1	74854934	74857733	+	Cdk5r2	protein_coding	0.222589	8.19684	2.14778	0.0369127	0.52661
Tmem229a	6	24951141	24956298	-	Tmem229a	protein_coding	-0.167556	6.604	-2.14774	0.0369161	0.52661
Ppp1r9b	11	94991035	95006900	+	Ppp1r9b	protein_coding	0.172867	9.95484	2.14762	0.0369259	0.52661
Smurf1	5	144876495	144965848	-	Smurf1	protein_coding	0.256515	5.76136	2.14759	0.0369281	0.52661
Cln3	7	126571207	126585818	-	Cln3	protein_coding	0.177111	2.91395	2.14712	0.0369681	0.52661
Ngly1	14	16249280	16311927	+	Ngly1	protein_coding	-0.17257	4.55883	-2.14639	0.0370292	0.52661
Pip4k2b	11	97715157	97744705	-	Pip4k2b	protein_coding	0.145192	7.78491	2.14568	0.0370891	0.52661
Zfp704	3	9427020	9610086	-	Zfp704	protein_coding	0.274233	6.64699	2.14566	0.0370909	0.52661
Ralgps1	2	33133417	33371487	-	Ralgps1	protein_coding	0.282287	6.23844	2.14495	0.0371505	0.52661
Gm2115	7	84528954	84583532	+	Gm2115	protein_coding	-0.187496	3.99327	-2.14481	0.0371621	0.52661
Spcs1	14	30999826	31001673	-	Spcs1	protein_coding	-0.26822	5.59808	-2.14431	0.0372049	0.52661
Bcl9	3	97203662	97297918	-	Bcl9	protein_coding	0.281717	5.85659	2.14387	0.0372414	0.52661
Dyrk1b	7	28179469	28187295	+	Dyrk1b	protein_coding	0.322268	3.92104	2.1434	0.0372816	0.52661
Ubox5	2	130590002	130630039	-	Ubox5	protein_coding	0.130981	4.70679	2.14233	0.0373723	0.52661
Tmem104	11	115187487	115247024	+	Tmem104	protein_coding	0.309021	4.12731	2.14198	0.0374016	0.52661
Zbtb43	2	33450287	33468560	-	Zbtb43	protein_coding	0.163865	5.28715	2.14147	0.0374448	0.52661
Vac14	8	110618585	110720399	+	Vac14	protein_coding	0.205148	4.50186	2.14128	0.0374617	0.52661
Otof	5	30367062	30461933	-	Otof	protein_coding	0.451261	3.95672	2.14115	0.0374724	0.52661
Eya3	4	132638987	132724766	+	Eya3	protein_coding	0.237278	4.9608	2.14099	0.0374858	0.52661
Gtf2f2	14	75896937	76010866	-	Gtf2f2	protein_coding	-0.220663	3.79068	-2.14071	0.0375099	0.52661
Gtf2h5	17	6079786	6086518	+	Gtf2h5	protein_coding	-0.179651	5.99914	-2.14063	0.0375164	0.52661
Malat1	19	5795690	5802673	-	Malat1	lincRNA	0.392579	8.88526	2.14015	0.0375572	0.52661
Htt	5	34761740	34912535	+	Htt	protein_coding	0.261463	7.57194	2.13999	0.0375712	0.52661
Txndc17	11	72207547	72210016	+	Txndc17	protein_coding	-0.186202	4.71158	-2.13993	0.0375763	0.52661
Pilra	5	137821952	137836282	-	Pilra	protein_coding	-0.155079	0.664266	-2.13976	0.0375911	0.52661
Nup210	6	91013068	91116830	-	Nup210	protein_coding	0.285058	4.59616	2.13791	0.0377491	0.52661
Add2	6	86028681	86124410	+	Add2	protein_coding	0.258613	8.60055	2.13788	0.0377509	0.52661
Zfp53	17	21488998	21510474	+	Zfp53	protein_coding	-0.214652	2.58953	-2.13784	0.0377545	0.52661
1700109K24Rik	15	77084398	77096315	+	1700109K24Rik	antisense	0.195618	1.19568	2.13729	0.0378022	0.52661
Mageh1	X	153036166	153037576	-	Mageh1	protein_coding	-0.23323	4.88339	-2.13706	0.0378216	0.52661
Fam53c	18	34758906	34773761	+	Fam53c	protein_coding	0.160561	6.34065	2.13698	0.0378287	0.52661
Cacng3	7	122670492	122769394	+	Cacng3	protein_coding	0.203037	7.24447	2.13689	0.0378363	0.52661
Rps10	17	27630418	27636670	-	Rps10	protein_coding	-0.240126	5.62564	-2.13668	0.0378545	0.52661
Adam8	7	139978932	139992563	-	Adam8	protein_coding	0.299837	1.48948	2.13658	0.0378626	0.52661
Mapkbp1	2	119972699	120027409	+	Mapkbp1	protein_coding	0.260445	6.18109	2.13598	0.0379141	0.52661
1810022K09Rik	3	14606284	14611286	-	1810022K09Rik	protein_coding	-0.333055	3.20043	-2.13595	0.0379168	0.52661
Lrfn1	7	28451980	28468243	+	Lrfn1	protein_coding	0.383146	5.16038	2.1356	0.0379473	0.52661
Dek	13	47084775	47106202	-	Dek	protein_coding	-0.157659	5.85463	-2.13486	0.0380108	0.52661
Ublcp1	11	44454571	44470499	-	Ublcp1	protein_coding	-0.188034	5.80668	-2.13437	0.0380524	0.52661
Gpatch8	11	102475915	102556393	-	Gpatch8	protein_coding	0.24524	6.76905	2.13435	0.0380542	0.52661
Emc2	15	43477229	43527764	+	Emc2	protein_coding	-0.184793	5.2654	-2.13384	0.0380985	0.52661
Ppp1r12b	1	134754658	134955943	-	Ppp1r12b	protein_coding	0.326562	5.49383	2.13342	0.0381344	0.52661
Myo18a	11	77763246	77865981	+	Myo18a	protein_coding	0.300501	6.95367	2.13337	0.0381391	0.52661
Ypel5	17	72836453	72851196	+	Ypel5	protein_coding	-0.142156	7.08151	-2.13312	0.0381606	0.52661
Tsc2	17	24595816	24632631	-	Tsc2	protein_coding	0.280457	6.3421	2.13189	0.038267	0.52765
Crebbp	16	4081328	4213998	-	Crebbp	protein_coding	0.354837	5.57844	2.13148	0.0383021	0.527704
Srrm2	17	23790532	23824742	+	Srrm2	protein_coding	0.38959	9.1134	2.12978	0.0384501	0.529209
Shank2	7	144001928	144424495	+	Shank2	protein_coding	0.435467	7.10297	2.12878	0.0385367	0.529209
Abcc12	8	86482260	86580687	-	Abcc12	protein_coding	0.238155	0.872359	2.12824	0.0385839	0.529209
Notch1	2	26457903	26516664	-	Notch1	protein_coding	0.286661	4.84912	2.12754	0.0386449	0.529209
Dact2	17	14195052	14204305	-	Dact2	protein_coding	0.242229	6.32668	2.12749	0.03865	0.529209
Rps9	7	3703993	3706898	+	Rps9	protein_coding	-0.238624	6.05108	-2.12738	0.0386591	0.529209
Vps37c	19	10688815	10714420	+	Vps37c	protein_coding	0.22071	4.7385	2.12723	0.0386727	0.529209
Mrpl48	7	100545751	100608302	-	Mrpl48	protein_coding	-0.176162	5.00158	-2.12651	0.0387351	0.529209
Mir124a-1hg	14	64587331	64593962	+	Mir124a-1hg	lincRNA	0.331985	7.42568	2.12643	0.0387425	0.529209
Nat8l	5	33995984	34005917	+	Nat8l	protein_coding	0.215392	9.01934	2.12629	0.0387546	0.529209
Proca1	11	78193392	78205764	+	Proca1	protein_coding	-0.255407	2.2423	-2.12577	0.0388	0.529209
Suclg1	6	73248382	73276912	+	Suclg1	protein_coding	-0.158421	6.32439	-2.12505	0.0388636	0.529209
Hdac7	15	97792664	97844503	-	Hdac7	protein_coding	0.295353	4.26792	2.12479	0.0388865	0.529209
Rnps1	17	24414675	24425896	+	Rnps1	protein_coding	0.171316	6.29557	2.12443	0.0389174	0.529209
Ephb6	6	41605482	41620510	+	Ephb6	protein_coding	0.272855	6.88934	2.12436	0.0389243	0.529209
Fam57b	7	126797668	126830220	+	Fam57b	protein_coding	0.281628	5.45904	2.12431	0.0389282	0.529209
Cbfa2t3	8	122625141	122699110	-	Cbfa2t3	protein_coding	0.313464	4.96471	2.12416	0.0389418	0.529209
Podn	4	108014791	108096446	-	Podn	protein_coding	0.304196	2.36291	2.12264	0.0390751	0.530547
Ogdh	11	6291633	6356643	+	Ogdh	protein_coding	0.168563	8.04946	2.12213	0.0391206	0.530547
Prpf40b	15	99295087	99317019	+	Prpf40b	protein_coding	0.257864	5.1673	2.12191	0.0391402	0.530547
2310009A05Rik	9	73039718	73042780	+	2310009A05Rik	processed_transcript	-0.252812	2.5272	-2.12162	0.0391654	0.530547
Armc4	18	7088233	7297902	-	Armc4	protein_coding	-0.181542	0.807738	-2.12103	0.0392175	0.530829
Gabrg1	5	70751047	70842618	-	Gabrg1	protein_coding	-0.278173	4.96243	-2.12034	0.039279	0.531238
Cacna1e	1	154390731	154884502	-	Cacna1e	protein_coding	0.403088	7.94297	2.11979	0.0393271	0.531464
Cntfr	4	41657498	41697090	-	Cntfr	protein_coding	0.317278	5.91061	2.11935	0.0393667	0.531575
Wdr81	11	75440944	75454718	-	Wdr81	protein_coding	0.272124	4.70511	2.11876	0.0394191	0.53186
9330151L19Rik	12	69197211	69199868	+	9330151L19Rik	bidirectional_promoter_lncRNA	0.187328	4.81837	2.11782	0.0395022	0.532557
Grb14	2	64912476	65024988	-	Grb14	protein_coding	-0.205261	4.27428	-2.11557	0.0397035	0.534082
Hlcs	16	94128882	94313572	-	Hlcs	protein_coding	0.185427	4.2369	2.11507	0.0397484	0.534082
Chchd1	14	20703006	20704426	+	Chchd1	protein_coding	-0.294994	4.75053	-2.11463	0.0397878	0.534082
Ap3d1	10	80706956	80742265	-	Ap3d1	protein_coding	0.14794	7.34392	2.11456	0.0397941	0.534082
Agap3	5	24452177	24502048	+	Agap3	protein_coding	0.254933	6.96177	2.11421	0.0398247	0.534082
Lrrn2	1	132880273	132940006	+	Lrrn2	protein_coding	0.21671	7.07181	2.11405	0.039839	0.534082
Snrnp70	7	45376453	45395743	-	Snrnp70	protein_coding	0.316703	7.59509	2.11398	0.0398453	0.534082
Zfp746	6	48062395	48086594	-	Zfp746	protein_coding	0.159369	4.824	2.11374	0.0398672	0.534082
Crmp1	5	37241940	37292134	+	Crmp1	protein_coding	0.163586	7.41913	2.1131	0.0399243	0.534371
Lhfpl4	6	113168090	113195385	-	Lhfpl4	protein_coding	0.214004	7.33008	2.11214	0.0400107	0.534371
Mib2	4	155654677	155669199	-	Mib2	protein_coding	0.251695	5.60669	2.11209	0.0400156	0.534371
Nphp4	4	152476706	152563184	+	Nphp4	protein_coding	0.302394	3.49861	2.11157	0.0400628	0.534371
Asrgl1	19	9109868	9135637	-	Asrgl1	protein_coding	-0.106424	7.64105	-2.111	0.0401142	0.534371
Ptpru	4	131768457	131838289	-	Ptpru	protein_coding	0.236793	5.01649	2.11084	0.040128	0.534371
Map6	7	99267447	99337138	+	Map6	protein_coding	0.231723	6.9656	2.11075	0.0401368	0.534371
Rps24	14	24487125	24496960	+	Rps24	protein_coding	-0.306185	5.9393	-2.1106	0.0401498	0.534371
Ap3b2	7	81460399	81493926	-	Ap3b2	protein_coding	0.156301	6.88455	2.10994	0.0402098	0.534371
F9	X	59999464	60030760	+	F9	protein_coding	-0.13263	0.375726	-2.10956	0.0402443	0.534371
Usp2	9	44067021	44095628	+	Usp2	protein_coding	0.1655	6.47358	2.10877	0.0403159	0.534371
Crh	3	19693401	19695397	-	Crh	protein_coding	-0.184233	2.51525	-2.10875	0.0403177	0.534371
Sar1b	11	51763687	51791926	+	Sar1b	protein_coding	-0.200243	5.75563	-2.10848	0.0403419	0.534371
Sdc3	4	130792537	130826320	+	Sdc3	protein_coding	0.213661	8.00955	2.10833	0.040355	0.534371
Cdh4	2	179442431	179899374	+	Cdh4	protein_coding	0.252892	4.89978	2.10791	0.0403933	0.534371
Coro2a	4	46536937	46602203	-	Coro2a	protein_coding	0.252116	5.15024	2.10783	0.0404008	0.534371
Pnn	12	59066884	59073999	+	Pnn	protein_coding	0.122508	6.43347	2.10736	0.0404436	0.534371
Olfml3	3	103722222	103738002	-	Olfml3	protein_coding	-0.216017	4.66283	-2.10722	0.0404559	0.534371
Pom121	5	135376141	135394547	-	Pom121	protein_coding	0.306086	6.22835	2.10536	0.0406257	0.535613
Slc25a37	14	69241848	69285113	-	Slc25a37	protein_coding	0.209692	5.40991	2.10525	0.0406356	0.535613
Zfp318	17	46383731	46420921	+	Zfp318	protein_coding	0.197419	6.16139	2.10515	0.0406447	0.535613
Gnaz	10	74967177	75016908	+	Gnaz	protein_coding	0.159346	6.02582	2.1037	0.0407772	0.535986
Vamp3	4	151047300	151057964	-	Vamp3	protein_coding	-0.130128	5.38995	-2.10355	0.0407913	0.535986
Tigd2	6	59208870	59212034	+	Tigd2	protein_coding	-0.20223	4.37207	-2.10342	0.0408032	0.535986
Ccdc116	16	17139064	17147230	-	Ccdc116	protein_coding	0.282282	2.08801	2.10316	0.0408268	0.535986
Usp48	4	137593755	137658538	+	Usp48	protein_coding	0.231894	6.14999	2.10306	0.0408362	0.535986
Dym	18	75018772	75286967	+	Dym	protein_coding	0.116266	5.66414	2.10264	0.0408747	0.535986
Olfml1	7	107567446	107591095	+	Olfml1	protein_coding	-0.222366	4.22577	-2.10223	0.0409124	0.535986
Pcnx3	19	5664635	5688909	-	Pcnx3	protein_coding	0.394575	4.99786	2.10144	0.0409847	0.535986
Aplp1	7	30434982	30445536	-	Aplp1	protein_coding	0.148638	9.95691	2.10131	0.040997	0.535986
Itpr3	17	27057304	27122224	+	Itpr3	protein_coding	0.275437	2.20311	2.10119	0.0410075	0.535986
Tmem128	5	38260185	38269635	+	Tmem128	protein_coding	-0.248405	4.5864	-2.10105	0.0410207	0.535986
Fth1	19	9982703	9985093	+	Fth1	protein_coding	-0.177838	10.5428	-2.1004	0.0410806	0.536357
Tpt1	14	75845093	75848526	+	Tpt1	protein_coding	-0.255767	6.15801	-2.09971	0.0411439	0.536751
Ercc2	7	19382010	19395695	+	Ercc2	protein_coding	0.269722	4.19872	2.09938	0.0411741	0.536751
Spag5	11	78301529	78322458	+	Spag5	protein_coding	0.352658	3.57134	2.09825	0.0412794	0.537119
Sh3rf3	10	58813359	59138917	+	Sh3rf3	protein_coding	0.19727	5.60749	2.09814	0.0412889	0.537119
Upf1	8	70331525	70353279	-	Upf1	protein_coding	0.183474	5.44204	2.09779	0.0413217	0.537119
Cnot3	7	3645268	3661110	+	Cnot3	protein_coding	0.29367	4.28255	2.09749	0.0413493	0.537119
Slc6a9	4	117834506	117875199	+	Slc6a9	protein_coding	0.23288	5.39706	2.09737	0.0413607	0.537119
Smim7	8	72565188	72571089	-	Smim7	protein_coding	-0.152241	6.97497	-2.09622	0.0414675	0.537847
Nkap	X	37126795	37150747	+	Nkap	protein_coding	-0.239892	4.31861	-2.09608	0.0414802	0.537847
Xkr7	2	153031852	153055776	+	Xkr7	protein_coding	0.25509	1.53873	2.09561	0.0415242	0.538006
Smad3	9	63646767	63757995	-	Smad3	protein_coding	0.235256	6.6691	2.09514	0.0415681	0.538164
Pla2g6	15	79286228	79328391	-	Pla2g6	protein_coding	0.3327	3.98553	2.09425	0.0416508	0.538666
Kl	5	150952607	150993818	+	Kl	protein_coding	-0.629393	2.87395	-2.09404	0.0416704	0.538666
2900026A02Rik	5	113086323	113221237	-	2900026A02Rik	protein_coding	0.321097	5.85414	2.09349	0.0417214	0.538761
Lrif1	3	106684987	106736578	+	Lrif1	protein_coding	-0.208333	4.4427	-2.09328	0.0417412	0.538761
4932438H23Rik	16	91053935	91095123	-	4932438H23Rik	protein_coding	-0.258096	1.51107	-2.09247	0.0418169	0.539326
Zzef1	11	72796226	72927121	+	Zzef1	protein_coding	0.226562	5.86635	2.09175	0.0418846	0.539402
Tmem86b	7	4628040	4631423	-	Tmem86b	protein_coding	0.255125	2.50815	2.09117	0.0419385	0.539402
BC024978	7	27195781	27210187	+	BC024978	protein_coding	0.160383	3.61171	2.09099	0.0419554	0.539402
Hipk4	7	27523267	27531176	+	Hipk4	protein_coding	0.399616	5.30452	2.09049	0.0420026	0.539402
Iqgap1	7	80711583	80825975	-	Iqgap1	protein_coding	0.259116	4.66134	2.09007	0.0420425	0.539402
Pgbd5	8	124369049	124439659	-	Pgbd5	protein_coding	0.140076	7.51861	2.08965	0.0420816	0.539402
Trak1	9	121297502	121474919	+	Trak1	protein_coding	0.181768	7.38285	2.08944	0.0421016	0.539402
Aanat	11	116586432	116597681	+	Aanat	protein_coding	0.110539	0.481117	2.08892	0.0421507	0.539402
Nup188	2	30286397	30344267	+	Nup188	protein_coding	0.279375	3.78721	2.0888	0.0421619	0.539402
Ints9	14	64950045	65039833	+	Ints9	protein_coding	0.179767	4.09212	2.08868	0.0421731	0.539402
Chst12	5	140505550	140525725	+	Chst12	protein_coding	0.245486	4.64552	2.08866	0.0421749	0.539402
Dhx35	2	158794807	158858215	+	Dhx35	protein_coding	0.158275	3.83258	2.08823	0.0422153	0.539402
Fam78a	2	32050055	32084858	-	Fam78a	protein_coding	0.258117	3.47057	2.08758	0.0422766	0.539402
Naa20	2	145902099	145916426	+	Naa20	protein_coding	-0.229226	5.5199	-2.08754	0.0422804	0.539402
9630013A20Rik	14	84458639	84476425	-	9630013A20Rik	antisense	-0.327613	1.42395	-2.08704	0.0423274	0.539402
Tceal8	X	136168984	136172343	-	Tceal8	protein_coding	-0.18919	5.6516	-2.08617	0.0424102	0.539402
Mrpl40	16	18872018	18876863	-	Mrpl40	protein_coding	-0.227586	4.60437	-2.08608	0.0424189	0.539402
Sufu	19	46396896	46488805	+	Sufu	protein_coding	0.241424	4.23206	2.08541	0.0424818	0.539402
Rps6ka4	19	6829085	6840602	-	Rps6ka4	protein_coding	0.139058	5.2594	2.08492	0.0425291	0.539402
Iqcb1	16	36828385	36872722	+	Iqcb1	protein_coding	-0.185415	4.3567	-2.08481	0.0425389	0.539402
H60b	10	22158586	22288850	+	H60b	protein_coding	-0.212091	0.797844	-2.08444	0.0425742	0.539402
Dnajc16	4	141760189	141790932	-	Dnajc16	protein_coding	0.244611	6.00895	2.08378	0.042637	0.539402
Mkl1	15	81012281	81190758	-	Mkl1	protein_coding	0.246338	5.81787	2.08372	0.0426426	0.539402
Ccdc91	6	147475828	147632613	+	Ccdc91	protein_coding	-0.127426	5.61375	-2.08367	0.0426478	0.539402
Mgst1	6	138140316	138156756	+	Mgst1	protein_coding	-0.352889	2.85294	-2.08357	0.0426574	0.539402
Anks1	17	27909306	28062776	+	Anks1	protein_coding	0.246426	4.87235	2.08345	0.042669	0.539402
Ywhaq	12	21390071	21417638	-	Ywhaq	protein_coding	-0.175307	7.66454	-2.08331	0.0426815	0.539402
Mrpl47	3	32725397	32737606	-	Mrpl47	protein_coding	-0.2322	3.09211	-2.08274	0.0427361	0.539434
Atp5g3	2	73908447	73911327	-	Atp5g3	protein_coding	-0.146309	7.11087	-2.08258	0.0427518	0.539434
Klf7	1	64029447	64122283	-	Klf7	protein_coding	0.25735	4.00367	2.08219	0.0427887	0.539434
Sfswap	5	129501221	129571385	+	Sfswap	protein_coding	0.271309	5.1865	2.08143	0.0428614	0.539434
Mst1r	9	107906873	107920384	+	Mst1r	protein_coding	0.139934	1.01994	2.08022	0.0429767	0.539434
Rexo1	10	80540922	80561561	-	Rexo1	protein_coding	0.304326	5.25781	2.08003	0.0429954	0.539434
BC048507	13	67863326	67863926	+	BC048507	protein_coding	-0.212138	3.4865	-2.07966	0.0430305	0.539434
Kifc1	17	33875666	33890662	-	Kifc1	protein_coding	0.182878	1.23521	2.07963	0.0430342	0.539434
Kcnc3	7	44590664	44604755	+	Kcnc3	protein_coding	0.386248	6.80612	2.07952	0.0430441	0.539434
Atp11a	8	12757014	12868729	+	Atp11a	protein_coding	0.261361	5.76429	2.07872	0.0431212	0.539434
A930009A15Rik	10	115569986	115582449	+	A930009A15Rik	protein_coding	0.0924827	0.355135	2.07837	0.0431545	0.539434
Slc7a1	5	148327410	148399905	-	Slc7a1	protein_coding	0.233767	5.70555	2.07812	0.0431792	0.539434
Mkks	2	136873780	136891390	-	Mkks	protein_coding	-0.191167	5.13704	-2.07804	0.0431867	0.539434
Tmem131	1	36792191	36943667	-	Tmem131	protein_coding	0.222791	6.21019	2.078	0.0431901	0.539434
Fscn1	5	142960343	142973186	+	Fscn1	protein_coding	0.247666	7.57507	2.07789	0.0432015	0.539434
Uba1	X	20658326	20683180	+	Uba1	protein_coding	0.116202	7.80344	2.0778	0.0432092	0.539434
Tspan15	10	62185396	62231252	-	Tspan15	protein_coding	-0.187394	4.02852	-2.0774	0.0432481	0.539434
Rnf138	18	21001341	21028224	+	Rnf138	protein_coding	-0.184119	4.07425	-2.07623	0.0433607	0.539434
Evi2a	11	79526560	79530610	-	Evi2a	protein_coding	-0.237237	5.58112	-2.07559	0.0434227	0.539434
Ube4bos3	4	149334639	149335898	+	Ube4bos3	antisense	0.270153	1.24349	2.07459	0.0435196	0.539434
Fam102a	2	32535332	32569757	+	Fam102a	protein_coding	0.158874	6.87295	2.0744	0.0435378	0.539434
H2afv	11	6427229	6444444	-	H2afv	protein_coding	-0.188744	5.39003	-2.0744	0.043538	0.539434
Hinfp	9	44292440	44305672	-	Hinfp	protein_coding	0.184645	3.74944	2.07423	0.0435544	0.539434
Polr2m	9	71478437	71485936	-	Polr2m	protein_coding	-0.109772	7.97205	-2.07418	0.0435591	0.539434
Fam96a	9	66126611	66138956	+	Fam96a	protein_coding	-0.232908	4.34131	-2.0738	0.043596	0.539434
BC017158	7	128271379	128298171	-	BC017158	protein_coding	0.24348	4.44231	2.07357	0.0436183	0.539434
Fam205a2	4	42522580	42528176	-	Fam205a2	protein_coding	0.253225	2.76404	2.07336	0.0436389	0.539434
Pcdhga3	18	37674307	37841874	+	Pcdhga3	protein_coding	0.270873	5.08055	2.07295	0.0436794	0.539434
Cacng6	7	3424195	3435668	+	Cacng6	protein_coding	0.206059	1.05528	2.07263	0.0437101	0.539434
Grina	15	76246764	76249905	+	Grina	protein_coding	0.185579	8.63573	2.07262	0.0437111	0.539434
1700063D05Rik	9	41192446	41217991	+	1700063D05Rik	lincRNA	-0.240253	1.02489	-2.07255	0.0437174	0.539434
Cpt1c	7	44959372	44974852	-	Cpt1c	protein_coding	0.152189	5.92679	2.07213	0.0437584	0.539434
Celf1	2	90940382	91019498	+	Celf1	protein_coding	0.181784	7.62814	2.07207	0.0437643	0.539434
Dnm1	2	32308471	32353339	-	Dnm1	protein_coding	0.28442	9.47442	2.07206	0.0437654	0.539434
Abcc10	17	46303221	46328353	-	Abcc10	protein_coding	0.318749	2.79926	2.07113	0.0438564	0.540163
Ell3	2	121439010	121444279	-	Ell3	protein_coding	-0.217517	2.65889	-2.07033	0.0439343	0.540729
Mtcl1	17	66336982	66449751	-	Mtcl1	protein_coding	0.254052	6.46773	2.06973	0.0439928	0.541057
Lamc2	1	153122756	153186448	-	Lamc2	protein_coding	0.222372	4.3771	2.06892	0.0440723	0.541536
Hnrnpm	17	33646233	33686861	-	Hnrnpm	protein_coding	0.197305	5.94111	2.06868	0.0440956	0.541536
Kcnb1	2	167095969	167190156	-	Kcnb1	protein_coding	0.369146	8.5294	2.06783	0.0441787	0.541876
Tkfc	19	10592200	10604259	-	Tkfc	protein_coding	0.162375	3.21713	2.06775	0.0441872	0.541876
Psmb1	17	15475021	15499752	-	Psmb1	protein_coding	-0.207586	6.20057	-2.06586	0.0443731	0.543681
Ski	4	155154075	155222593	-	Ski	protein_coding	0.22653	7.48425	2.0656	0.0443985	0.543681
Plekhh3	11	101162679	101171352	-	Plekhh3	protein_coding	0.300472	2.82646	2.06435	0.0445215	0.54393
Osbp2	11	3703731	3863904	-	Osbp2	protein_coding	0.217469	6.52178	2.06253	0.0447021	0.54393
Rgs11	17	26202951	26211325	+	Rgs11	protein_coding	0.315604	4.33798	2.06249	0.0447057	0.54393
Entpd7	19	43689672	43733698	+	Entpd7	protein_coding	0.264372	3.36816	2.06219	0.0447356	0.54393
Cnih1	14	46775567	46788412	-	Cnih1	protein_coding	-0.166702	6.52518	-2.06202	0.0447524	0.54393
Siglec1	2	131069220	131086766	-	Siglec1	protein_coding	0.103652	0.21752	2.06169	0.0447858	0.54393
Gm14322	2	177759288	177770473	+	Gm14322	protein_coding	-0.201037	3.24388	-2.0615	0.0448044	0.54393
Zfp592	7	80993681	81045165	+	Zfp592	protein_coding	0.26435	5.38997	2.06147	0.0448074	0.54393
Gng11	6	4003904	4008446	+	Gng11	protein_coding	-0.309457	3.7126	-2.06014	0.04494	0.54393
Msantd4	9	4376562	4386871	+	Msantd4	protein_coding	-0.143965	6.39975	-2.05995	0.0449583	0.54393
Sidt2	9	45937857	45955259	-	Sidt2	protein_coding	0.187254	6.09306	2.05976	0.0449779	0.54393
Cmpk1	4	114959336	114987242	-	Cmpk1	protein_coding	-0.163536	6.14448	-2.05968	0.0449861	0.54393
Hephl1	9	15051841	15112109	-	Hephl1	protein_coding	0.0897337	0.119439	2.05948	0.0450061	0.54393
Mau2	8	70016123	70042735	-	Mau2	protein_coding	0.16939	6.09388	2.05876	0.0450772	0.54393
Sema6c	3	95160457	95174025	+	Sema6c	protein_coding	0.352795	3.10249	2.0585	0.0451037	0.54393
Smpdl3a	10	57794335	57811831	+	Smpdl3a	protein_coding	-0.193088	5.12005	-2.05846	0.0451071	0.54393
Aspdh	7	44465391	44467759	+	Aspdh	protein_coding	0.242422	0.732963	2.05843	0.0451108	0.54393
Ankle1	8	71406010	71409905	+	Ankle1	protein_coding	0.0904346	0.280031	2.05832	0.0451218	0.54393
Megf8	7	25317164	25365918	+	Megf8	protein_coding	0.240766	7.22141	2.05821	0.0451325	0.54393
Sh2b1	7	126466994	126475425	-	Sh2b1	protein_coding	0.182768	6.00175	2.05739	0.0452142	0.54393
Mras	9	99385420	99437382	-	Mras	protein_coding	0.124507	8.4751	2.05723	0.0452308	0.54393
Golga2	2	32287384	32307922	+	Golga2	protein_coding	0.188868	6.37839	2.0572	0.0452333	0.54393
1110059E24Rik	19	21581202	21652977	-	1110059E24Rik	protein_coding	-0.270548	4.50055	-2.05668	0.0452856	0.54393
Zfp384	6	125009145	125037871	+	Zfp384	protein_coding	0.229323	4.646	2.05658	0.0452962	0.54393
Fntb	12	76765589	76921413	+	Fntb	protein_coding	0.151128	5.08969	2.05628	0.0453256	0.54393
Gprc5d	6	135105991	135118284	-	Gprc5d	protein_coding	0.0960625	0.239603	2.05608	0.0453455	0.54393
Nrxn2	19	6418731	6544170	+	Nrxn2	protein_coding	0.307186	7.42575	2.05538	0.045416	0.54393
Neurl4	11	69901072	69913821	+	Neurl4	protein_coding	0.191893	6.72556	2.05486	0.045469	0.54393
Suclg2	6	95473009	95718801	-	Suclg2	protein_coding	-0.183911	4.15318	-2.0548	0.0454746	0.54393
Paip1	13	119428601	119458219	+	Paip1	protein_coding	-0.20756	5.99557	-2.05478	0.0454772	0.54393
Rps23	13	90922958	90924951	+	Rps23	protein_coding	-0.251342	5.19983	-2.05425	0.0455305	0.54393
Slc36a1	11	55204350	55236331	+	Slc36a1	protein_coding	0.265614	6.73389	2.05424	0.045531	0.54393
Mzf1	7	13042303	13054765	-	Mzf1	protein_coding	0.191334	2.79978	2.054	0.0455551	0.54393
Eif4a2	16	23107444	23114137	+	Eif4a2	protein_coding	-0.169574	8.89037	-2.0539	0.0455653	0.54393
Plp1	X	136822671	136839734	+	Plp1	protein_coding	-0.214606	10.931	-2.05379	0.0455767	0.54393
Vmp1	11	86583865	86683837	-	Vmp1	protein_coding	-0.205587	6.8204	-2.05372	0.0455838	0.54393
Ezh1	11	101191115	101226464	-	Ezh1	protein_coding	0.113542	5.92836	2.0532	0.0456363	0.54393
Ackr1	1	173331886	173333751	-	Ackr1	protein_coding	0.33905	5.3177	2.05319	0.0456376	0.54393
Fstl4	11	52764634	53188539	+	Fstl4	protein_coding	0.302204	4.27728	2.05188	0.0457699	0.545125
Slc2a5	4	150119283	150144170	+	Slc2a5	protein_coding	-0.310117	2.26203	-2.0512	0.0458384	0.545557
Svip	7	51997171	52006019	-	Svip	protein_coding	-0.184174	6.43166	-2.05058	0.0459013	0.545566
Mybbp1a	11	72441355	72451769	+	Mybbp1a	protein_coding	0.167295	5.50417	2.05054	0.0459054	0.545566
Fam120aos	13	48968287	48972032	+	Fam120aos	lincRNA	-0.252239	4.34637	-2.04998	0.045962	0.545566
Cryz	3	154596711	154623183	+	Cryz	protein_coding	-0.249006	3.95836	-2.04972	0.0459884	0.545566
Htr5b	1	121509842	121528466	-	Htr5b	protein_coding	-0.234385	0.801764	-2.04927	0.0460349	0.545566
Mrps10	17	47368887	47381418	+	Mrps10	protein_coding	-0.198866	3.39184	-2.04926	0.0460356	0.545566
Slc5a8	10	88885992	88929516	+	Slc5a8	protein_coding	0.081144	0.207998	2.04878	0.0460844	0.545566
Bag1	4	40936398	40948295	-	Bag1	protein_coding	-0.154958	6.37572	-2.04824	0.0461393	0.545566
BC030499	11	78290841	78296806	+	BC030499	protein_coding	0.358955	3.47002	2.04819	0.0461447	0.545566
Plk5	10	80356459	80365490	+	Plk5	protein_coding	0.268698	3.45586	2.04803	0.0461608	0.545566
Tstd1	1	171418872	171420353	+	Tstd1	protein_coding	0.0916239	0.294057	2.04752	0.0462131	0.545804
Syna	5	134558146	134560172	-	Syna	protein_coding	0.354098	2.8037	2.04717	0.0462489	0.545847
Gli2	1	118834132	119053620	-	Gli2	protein_coding	0.317161	2.41836	2.04616	0.0463519	0.54646
Syvn1	19	6046576	6053713	+	Syvn1	protein_coding	0.248908	5.32261	2.04603	0.0463653	0.54646
Echs1	7	140105710	140116477	-	Echs1	protein_coding	-0.193412	5.42817	-2.04499	0.0464716	0.547241
Tcf7l2	19	55741810	55933655	+	Tcf7l2	protein_coding	-0.355503	2.58753	-2.04451	0.0465213	0.547241
Spock2	10	60106219	60135199	+	Spock2	protein_coding	0.269654	9.4403	2.04444	0.0465284	0.547241
Pcnt	10	76351263	76442787	-	Pcnt	protein_coding	0.296076	4.56844	2.04404	0.0465696	0.547346
Ctsc	7	88278085	88310889	+	Ctsc	protein_coding	-0.277884	3.35783	-2.04267	0.0467108	0.548625
Ndufb8	19	44548572	44555441	-	Ndufb8	protein_coding	-0.213092	6.43075	-2.041	0.0468825	0.549457
Tmem59	4	107178399	107200997	+	Tmem59	protein_coding	-0.154991	7.23265	-2.04081	0.0469025	0.549457
Cnnm4	1	36471620	36508765	+	Cnnm4	protein_coding	0.235977	4.22513	2.04081	0.0469027	0.549457
Cyfip2	11	46193850	46312860	-	Cyfip2	protein_coding	0.213673	10.3828	2.04035	0.04695	0.549457
Nat1	8	67480921	67492105	+	Nat1	protein_coding	-0.333387	1.70553	-2.04028	0.0469573	0.549457
Sumf2	5	129846986	129864051	+	Sumf2	protein_coding	-0.130416	3.77814	-2.03921	0.047068	0.549457
4930473A02Rik	2	130543791	130563750	-	4930473A02Rik	antisense	-0.148694	1.99502	-2.03906	0.0470836	0.549457
Blvra	2	127070665	127097085	+	Blvra	protein_coding	-0.181853	4.01298	-2.03902	0.0470883	0.549457
Susd4	1	182763860	182896592	+	Susd4	protein_coding	0.154502	6.8178	2.03891	0.0470997	0.549457
Srsf3	17	29032628	29043374	+	Srsf3	protein_coding	-0.173942	6.59442	-2.03885	0.0471055	0.549457
Plxnb2	15	89155549	89180789	-	Plxnb2	protein_coding	0.233287	5.34148	2.03843	0.0471489	0.549585
Nsun7	5	66259897	66298027	+	Nsun7	protein_coding	0.267074	3.06472	2.03781	0.0472141	0.549966
Fez1	9	36821864	36878925	+	Fez1	protein_coding	-0.130895	7.54924	-2.03625	0.047376	0.550823
Cwc15	9	14500617	14510578	+	Cwc15	protein_coding	-0.157622	5.26378	-2.03618	0.047383	0.550823
Cacna1c	6	118587240	119196419	-	Cacna1c	protein_coding	0.363123	6.30903	2.0356	0.0474441	0.550823
Arhgap24	5	102481391	102897938	+	Arhgap24	protein_coding	-0.151648	2.98006	-2.03507	0.0474998	0.550823
Slc38a7	8	95835920	95853540	-	Slc38a7	protein_coding	0.189486	4.89128	2.03499	0.0475077	0.550823
Snph	2	151590549	151632594	-	Snph	protein_coding	0.239638	8.58497	2.03442	0.0475678	0.550823
Pf4	5	90772435	90773384	+	Pf4	protein_coding	-0.175165	0.563388	-2.03421	0.0475891	0.550823
Haus2	2	120609383	120621561	+	Haus2	protein_coding	-0.152733	5.24786	-2.03386	0.0476256	0.550823
Adam15	3	89338542	89349997	-	Adam15	protein_coding	0.244865	5.67027	2.03373	0.0476401	0.550823
Smim17	7	6398715	6432094	+	Smim17	protein_coding	-0.200295	4.09854	-2.03345	0.0476692	0.550823
Serpinb6a	13	33917918	34002795	-	Serpinb6a	protein_coding	-0.189648	4.62413	-2.03344	0.0476697	0.550823
Fbp1	13	62864753	62888283	-	Fbp1	protein_coding	-0.0993153	0.307156	-2.03337	0.0476773	0.550823
Inpp5e	2	26396249	26409204	-	Inpp5e	protein_coding	0.196968	5.31596	2.03195	0.0478262	0.551983
Scyl1	19	5758427	5771402	-	Scyl1	protein_coding	0.108633	6.05511	2.03179	0.0478429	0.551983
Dhx38	8	109548011	109565862	-	Dhx38	protein_coding	0.18535	4.9023	2.0309	0.0479375	0.552699
Cops5	1	10024601	10038169	-	Cops5	protein_coding	-0.165008	5.68541	-2.02991	0.0480414	0.553283
Aatk	11	120007313	120047168	-	Aatk	protein_coding	0.31667	7.80305	2.0298	0.0480534	0.553283
Zkscan2	7	123475384	123500450	-	Zkscan2	protein_coding	0.289701	4.44818	2.02915	0.0481217	0.553356
Mrps28	3	8802146	8923919	-	Mrps28	protein_coding	-0.334404	3.21333	-2.02912	0.048125	0.553356
Gm16861	16	4935049	4939634	-	Gm16861	antisense	0.206579	1.62794	2.02799	0.0482443	0.554352
Enpp1	10	24637914	24712160	-	Enpp1	protein_coding	-0.191194	2.82016	-2.02735	0.0483128	0.554763
Rapgef2	3	79062516	79286518	-	Rapgef2	protein_coding	0.176154	6.84835	2.02676	0.0483753	0.554782
Slc35a3	3	116669470	116712832	-	Slc35a3	protein_coding	-0.179111	4.53461	-2.02657	0.0483959	0.554782
Acadl	1	66830839	66863278	-	Acadl	protein_coding	-0.191335	5.3652	-2.02641	0.0484126	0.554782
Hnrnpdl	5	100033577	100039665	-	Hnrnpdl	protein_coding	-0.130367	7.25451	-2.02534	0.048526	0.555678
Sstr4	2	148395344	148396768	+	Sstr4	protein_coding	0.334368	3.07854	2.02459	0.0486068	0.555678
Kcnc1	7	46396497	46438705	+	Kcnc1	protein_coding	0.195683	7.59224	2.02444	0.0486224	0.555678
Ddn	15	98803777	98809491	-	Ddn	protein_coding	0.181244	10.1435	2.02426	0.0486412	0.555678
Arhgap32	9	32116136	32268447	+	Arhgap32	protein_coding	0.254012	9.02591	2.02409	0.0486599	0.555678
1700028P14Rik	19	23558760	23652813	-	1700028P14Rik	protein_coding	-0.198293	0.854172	-2.0233	0.0487443	0.555678
Scn4b	9	45138395	45154153	+	Scn4b	protein_coding	0.346354	8.82898	2.02324	0.0487506	0.555678
Cd300c2	11	114996721	115001881	-	Cd300c2	protein_coding	-0.296141	2.12206	-2.02316	0.0487586	0.555678
Tbcb	7	30224131	30232273	-	Tbcb	protein_coding	-0.159395	5.8361	-2.02291	0.0487856	0.555678
Rab11a	9	64715299	64737759	-	Rab11a	protein_coding	-0.159338	7.08917	-2.02254	0.0488255	0.555759
Flna	X	74223461	74249821	-	Flna	protein_coding	0.27726	5.51011	2.02168	0.0489179	0.5561
Nptx1	11	119538719	119547754	-	Nptx1	protein_coding	0.314066	9.13254	2.02115	0.0489743	0.5561
Zfp966	2	175918881	175931101	-	Zfp966	protein_coding	-0.207225	1.98016	-2.02105	0.0489857	0.5561
Ggn	7	29170210	29173977	+	Ggn	protein_coding	0.156606	0.660218	2.02086	0.0490053	0.5561
Ttc7b	12	100300770	100520827	-	Ttc7b	protein_coding	0.157066	7.5321	2.02059	0.0490344	0.5561
Car2	3	14886273	14900771	+	Car2	protein_coding	-0.152533	7.80568	-2.02003	0.049095	0.5561
St18	1	6487231	6860941	+	St18	protein_coding	-0.20624	3.35241	-2.01977	0.0491232	0.5561
Ppp1r13l	7	19359749	19378534	+	Ppp1r13l	protein_coding	0.272984	1.77458	2.01966	0.0491341	0.5561
Zfat	15	68083764	68258857	-	Zfat	protein_coding	0.247274	3.16562	2.01951	0.0491506	0.5561
Snapc4	2	26362765	26380654	-	Snapc4	protein_coding	0.259294	4.81154	2.01855	0.049254	0.556527
Ralgds	2	28513125	28553082	+	Ralgds	protein_coding	0.196475	6.46803	2.01854	0.0492557	0.556527
Bpgm	6	34476207	34505614	+	Bpgm	protein_coding	-0.132384	6.57734	-2.01822	0.0492896	0.556527
Pqlc2	4	139294029	139310709	-	Pqlc2	protein_coding	0.245417	3.09074	2.01772	0.0493444	0.556527
Vgf	5	137026392	137033352	+	Vgf	protein_coding	0.236763	6.69263	2.01757	0.0493597	0.556527
Ptprh	7	4548612	4604042	-	Ptprh	protein_coding	0.185162	1.08127	2.01697	0.0494254	0.556527
1500015O10Rik	1	43730602	43742579	+	1500015O10Rik	protein_coding	-0.493974	1.67107	-2.01655	0.0494704	0.556527
Zfp120	2	150114406	150136709	-	Zfp120	protein_coding	-0.194197	4.35358	-2.01632	0.0494953	0.556527
Phf2	13	48801750	48871120	-	Phf2	protein_coding	0.26261	5.4227	2.01618	0.0495104	0.556527
Usp24	4	106316213	106441323	+	Usp24	protein_coding	0.192943	6.3033	2.01613	0.0495165	0.556527
Phf21a	2	92093117	92364667	+	Phf21a	protein_coding	0.253894	5.40194	2.0152	0.0496169	0.556958
Plag1	4	3900996	3938424	-	Plag1	protein_coding	0.276429	2.41607	2.01501	0.0496372	0.556958
Ppp1r26	2	28446800	28455509	+	Ppp1r26	protein_coding	0.181511	5.03335	2.01476	0.0496645	0.556958
Trat1	16	48730774	48772022	-	Trat1	protein_coding	0.135735	0.332519	2.01456	0.0496861	0.556958
Acr	15	89568326	89574586	+	Acr	protein_coding	0.26989	1.29636	2.01263	0.049897	0.557317
Fabp7	10	57784881	57788451	+	Fabp7	protein_coding	-0.306018	4.10071	-2.01231	0.0499322	0.557317
Gm29508	12	103312367	103314770	-	Gm29508	antisense	-0.183776	0.846373	-2.01197	0.0499693	0.557317
Rnf208	2	25242255	25244263	+	Rnf208	protein_coding	0.287297	6.62746	2.01194	0.0499722	0.557317
Usp13	3	32817546	32938072	+	Usp13	protein_coding	0.218482	4.83725	2.01186	0.0499813	0.557317

## Sheet: Full model E4 vs E3 p<0.05
Gene Symbol	Chromosome	Start	Stop	Strand	gene_name	gene_type	logFC	AveExpr	t	P.Value	adj.P.Val
2210418O10Rik	2	176226569	176240329	+	2210418O10Rik	protein_coding	-3.89496	2.75855	-35.6995	9.88125e-36	1.67586e-31
Gm14296	2	176892509	176927810	-	Gm14296	protein_coding	-3.93454	3.18949	-32.3023	9.1108e-34	7.72596e-30
Gm13304	4	42114817	42115918	+	Gm13304	protein_coding	-2.39983	1.05705	-27.6536	9.51464e-31	5.37894e-27
Gm21541	4	41903610	41904744	+	Gm21541	protein_coding	-2.35774	1.10439	-25.6982	2.43024e-29	1.03042e-25
Ccl21a	4	42772860	42773994	-	Ccl21a	protein_coding	-1.8143	0.835007	-22.5015	7.9328e-27	2.69081e-23
Oscar	7	3609813	3616158	-	Oscar	protein_coding	1.69017	1.00104	18.3399	4.54017e-23	1.28335e-19
Gm14434	2	176473278	176486784	-	Gm14434	protein_coding	-1.40289	3.44979	-16.6321	2.46926e-21	5.98267e-18
Gm14305	2	176708328	176721814	+	Gm14305	protein_coding	-1.92522	2.81342	-15.846	1.71821e-20	3.6426e-17
Ptprh	7	4548612	4604042	-	Ptprh	protein_coding	1.68213	1.08127	14.9611	1.65475e-19	3.11829e-16
Gm14308	2	176613364	176636345	-	Gm14308	protein_coding	-1.39746	3.48181	-14.7603	2.80072e-19	4.63827e-16
Gm4724	2	175422300	175435808	-	Gm4724	protein_coding	-1.47918	3.43413	-14.7332	3.00831e-19	4.63827e-16
Gm14295	2	176798612	176811224	+	Gm14295	protein_coding	-2.17092	3.2039	-13.7571	4.17176e-18	5.89608e-15
Zfp973	2	176670522	176719086	+	Zfp973	protein_coding	-1.34493	1.32332	-13.5383	7.64078e-18	9.96828e-15
Zfp965	2	175469985	175482172	+	Zfp965	protein_coding	-1.30905	1.23857	-13.389	1.15884e-17	1.40385e-14
Dnah6	6	73017606	73221652	-	Dnah6	protein_coding	2.40776	2.57351	12.2223	3.30439e-16	3.73617e-13
Zfp967	2	176521056	176532480	+	Zfp967	protein_coding	-1.30035	1.72595	-11.5639	2.36418e-15	2.50603e-12
Zfp966	2	175918881	175931101	-	Zfp966	protein_coding	-1.44094	1.98016	-11.4745	3.10112e-15	3.09383e-12
AI506816	5	23698296	23712668	-	AI506816	processed_transcript	2.55346	1.6933	11.2998	5.28757e-15	4.98206e-12
Nat8f5	6	85817218	85820973	-	Nat8f5	protein_coding	-1.12972	0.989677	-11.0819	1.03428e-14	8.95838e-12
Gm14440	2	175275125	175286806	+	Gm14440	protein_coding	-1.32696	2.45274	-11.0751	1.05641e-14	8.95838e-12
Serpina3n	12	104406729	104414330	+	Serpina3n	protein_coding	2.18443	5.17035	10.7471	2.93417e-14	2.36969e-11
G530011O06Rik	X	169975043	169978918	-	G530011O06Rik	processed_transcript	-1.91906	1.94162	-9.82063	5.66015e-13	4.36346e-10
Cep78	19	15955774	15984990	-	Cep78	protein_coding	1.29205	3.63439	9.04242	7.36355e-12	5.42982e-09
Serpina3f	12	104214544	104221130	+	Serpina3f	protein_coding	0.960428	0.575187	8.67693	2.51422e-11	1.77672e-08
Eps8l1	7	4460674	4480488	+	Eps8l1	protein_coding	1.45148	1.46094	8.57482	3.55175e-11	2.40951e-08
Pyroxd2	19	42725858	42752776	-	Pyroxd2	protein_coding	1.3804	1.7636	8.26942	1.00412e-10	6.54994e-08
Aldh1a1	19	20492715	20643463	+	Aldh1a1	protein_coding	-1.14143	5.02644	-8.21428	1.21242e-10	7.6158e-08
Bub1b	2	118598211	118641592	+	Bub1b	protein_coding	1.05806	1.94512	8.18437	1.34312e-10	8.13547e-08
Tmc4	7	3665790	3677554	-	Tmc4	protein_coding	0.973642	1.37423	8.11782	1.68714e-10	9.86685e-08
Dmkn	7	30763756	30781064	+	Dmkn	protein_coding	-1.29325	1.67088	-8.03148	2.26924e-10	1.28287e-07
Ints7	1	191575636	191623689	+	Ints7	protein_coding	0.923462	5.17027	7.88262	3.78801e-10	2.07241e-07
Rdh13	7	4424770	4445650	-	Rdh13	protein_coding	-0.789203	4.86352	-7.56962	1.11828e-09	5.92686e-07
Gm3893	4	42091207	42092288	+	Gm3893	protein_coding	-1.09382	1.71542	-7.47984	1.52717e-09	7.84871e-07
Ninj2	6	120093350	120200340	+	Ninj2	protein_coding	-1.05862	1.32663	-7.35104	2.38991e-09	1.19214e-06
Fam177a	12	55124469	55142105	+	Fam177a	protein_coding	0.661366	4.62465	7.32775	2.59172e-09	1.25588e-06
Gm1943	8	109340691	109340865	-	Gm1943	processed_pseudogene	-0.947145	2.54182	-7.29647	2.89001e-09	1.36152e-06
Fank1	7	133776861	133881533	+	Fank1	protein_coding	-0.919944	2.06038	-7.05454	6.71983e-09	3.08023e-06
C3	17	57203970	57228137	-	C3	protein_coding	-1.44754	1.05973	-7.025	7.45006e-09	3.32508e-06
2700038G22Rik	5	23850597	23855039	+	2700038G22Rik	lincRNA	0.858765	1.00409	6.86158	1.31892e-08	5.73563e-06
Vrk1	12	106010228	106077427	+	Vrk1	protein_coding	0.948187	3.34493	6.71945	2.16845e-08	9.19423e-06
1700047I17Rik2	12	55199592	55217169	+	1700047I17Rik2	protein_coding	0.655919	4.62388	6.66527	2.62117e-08	1.08427e-05
Mboat7	7	3677789	3693524	-	Mboat7	protein_coding	0.47711	6.91864	6.58443	3.47819e-08	1.40453e-05
Gm14326	2	177935993	177957298	-	Gm14326	protein_coding	-0.755166	4.07244	-6.49826	4.70254e-08	1.85477e-05
Gpatch11	17	78835567	78848309	+	Gpatch11	protein_coding	-0.587447	5.26093	-6.37453	7.24979e-08	2.79447e-05
Gcnt1	19	17326141	17356668	-	Gcnt1	protein_coding	0.787694	2.65854	6.31965	8.78401e-08	3.31059e-05
Dmp1	5	104202613	104214103	+	Dmp1	protein_coding	-0.900364	3.57882	-6.31247	9.00724e-08	3.32093e-05
Copz1	15	103272714	103299869	+	Copz1	protein_coding	-0.466404	6.75312	-6.26131	1.07713e-07	3.88685e-05
Dctd	8	48099092	48153234	+	Dctd	protein_coding	-0.891335	2.76119	-6.20427	1.31477e-07	4.64552e-05
Gm14288	2	175789357	175801094	-	Gm14288	protein_coding	-0.685501	1.32513	-6.19235	1.37066e-07	4.74418e-05
Pcdhgb8	18	37761801	37841871	+	Pcdhgb8	polymorphic_pseudogene	-1.3544	2.7872	-6.15962	1.53665e-07	5.21232e-05
Adgrg6	10	14402583	14545660	-	Adgrg6	protein_coding	1.21025	2.46923	6.04749	2.27278e-07	7.55809e-05
Gpr68	12	100876682	100908199	-	Gpr68	protein_coding	0.894589	3.71146	5.98607	2.81541e-07	9.1286e-05
Anxa4	6	86736840	86793585	-	Anxa4	protein_coding	0.699836	2.42247	5.9823	2.85269e-07	9.1286e-05
Dtnb	12	3572381	3781797	+	Dtnb	protein_coding	0.533048	5.30965	5.9471	3.22483e-07	0.000101284
Pirb	7	3711409	3720392	-	Pirb	protein_coding	-0.728072	0.668728	-5.90359	3.75234e-07	0.000115709
Vangl2	1	172000960	172028445	-	Vangl2	protein_coding	0.703738	4.1113	5.78597	5.64807e-07	0.000171056
Nfu1	6	87009236	87028462	+	Nfu1	protein_coding	-0.794063	3.32848	-5.77114	5.94646e-07	0.000176933
Zfp600	4	146156824	146198756	+	Zfp600	protein_coding	0.47474	0.334081	5.73837	6.66272e-07	0.000194827
Kif11	19	37376403	37421860	+	Kif11	protein_coding	-0.724076	1.48854	-5.52163	1.41046e-06	0.000405449
Srp54b	12	55155104	55189574	+	Srp54b	protein_coding	0.451017	5.58943	5.50773	1.47974e-06	0.000418273
Cd84	1	171839697	171890719	+	Cd84	protein_coding	-0.847249	1.9864	-5.47217	1.67277e-06	0.000465086
Sec14l1	11	117115168	117159269	+	Sec14l1	protein_coding	0.496851	8.13526	5.45223	1.79165e-06	0.000489324
Hnf1b	11	83850063	83905820	+	Hnf1b	protein_coding	-0.694156	0.688274	-5.44805	1.81765e-06	0.000489324
Pcdhb12	18	37435621	37438655	+	Pcdhb12	protein_coding	0.713647	3.69624	5.42491	1.96834e-06	0.00052161
Tmem252	19	24674008	24679662	+	Tmem252	protein_coding	-0.710973	1.07754	-5.41046	2.0686e-06	0.000539746
Gm10516	1	192136896	192151027	+	Gm10516	antisense	0.571494	3.08493	5.39407	2.18855e-06	0.00056239
Rex2	4	147021850	147060795	+	Rex2	protein_coding	0.488973	0.329048	5.36573	2.41228e-06	0.000610631
Hmgn2	4	133964738	133968651	-	Hmgn2	protein_coding	-0.631726	4.83154	-5.35763	2.48029e-06	0.000618614
Sspn	6	145931641	145965224	+	Sspn	protein_coding	-0.933221	3.82062	-5.33522	2.6786e-06	0.000658392
Arg2	12	79130777	79156302	+	Arg2	protein_coding	-0.849632	2.02505	-5.29972	3.02519e-06	0.000732961
Nat8f4	6	85899051	85904885	-	Nat8f4	protein_coding	-0.505129	3.94166	-5.28081	3.22758e-06	0.000770982
Aga	8	53511727	53523422	+	Aga	protein_coding	-0.811521	2.19264	-5.27262	3.31929e-06	0.000781876
Glb1l	1	75198236	75210814	-	Glb1l	protein_coding	0.719033	2.81454	5.25501	3.52542e-06	0.000819057
Chga	12	102554969	102565029	+	Chga	protein_coding	0.583474	7.31509	5.21995	3.97419e-06	0.000910841
Srp54a	12	55080262	55115368	+	Srp54a	protein_coding	0.481808	5.6349	5.19863	4.2742e-06	0.00096654
Scn7a	2	66673425	66784915	-	Scn7a	protein_coding	-0.893584	2.46261	-5.18827	4.42795e-06	0.000988132
Tdp1	12	99884517	99955220	+	Tdp1	protein_coding	0.501942	3.22077	5.16678	4.76457e-06	0.00104944
Aqp4	18	15389394	15403685	-	Aqp4	protein_coding	-0.551221	7.36223	-5.15704	4.92541e-06	0.00107096
Sbsn	7	30751471	30756135	+	Sbsn	protein_coding	-0.750838	2.68684	-5.14654	5.10474e-06	0.0010959
L3hypdh	12	72073428	72085440	-	L3hypdh	protein_coding	-0.648894	1.70244	-5.11361	5.70992e-06	0.0012105
Pcdhb10	18	37411664	37414515	+	Pcdhb10	protein_coding	0.573608	2.66595	5.08382	6.31821e-06	0.00132292
Cd164l2	4	133212131	133224556	+	Cd164l2	protein_coding	-0.729109	1.87756	-5.05932	6.86599e-06	0.00142009
Jam2	16	84774123	84825929	+	Jam2	protein_coding	-0.352724	6.16171	-5.03256	7.51809e-06	0.00153623
Lamb3	1	193207699	193343879	+	Lamb3	protein_coding	-0.695961	1.6102	-5.01816	7.89377e-06	0.00159379
Gm3435	17	15010176	15022450	+	Gm3435	protein_coding	-0.499802	2.13079	-5.00909	8.13997e-06	0.00162416
Hdac1	4	129516104	129542714	-	Hdac1	protein_coding	-0.644419	2.93238	-4.99678	8.48593e-06	0.00165699
Rhoj	12	75308322	75401457	+	Rhoj	protein_coding	-0.659191	2.24733	-4.9963	8.49988e-06	0.00165699
Pcdhb9	18	37400855	37403910	+	Pcdhb9	protein_coding	0.551945	4.41555	4.99171	8.63285e-06	0.00166379
Sesn2	4	132492032	132510502	-	Sesn2	protein_coding	0.992732	3.67505	4.95982	9.61499e-06	0.00183225
Gm10432	12	100276609	100302316	+	Gm10432	processed_transcript	0.886431	2.13794	4.94362	1.01551e-05	0.00191367
Serpina3c	12	104146382	104153871	-	Serpina3c	protein_coding	0.308343	0.202678	4.92507	1.08107e-05	0.00201483
Tmcc1	6	116018611	116193487	-	Tmcc1	protein_coding	0.430542	6.77307	4.89738	1.18671e-05	0.00218768
Pcyox1	6	86386006	86397155	-	Pcyox1	protein_coding	-0.276467	7.38912	-4.87998	1.25824e-05	0.00227748
Masp2	4	148602554	148615500	+	Masp2	protein_coding	0.586432	0.645059	4.87379	1.28471e-05	0.00227748
Adssl1	12	112620045	112641361	+	Adssl1	protein_coding	0.583334	3.85636	4.87367	1.28519e-05	0.00227748
Hpgd	8	56294585	56321044	+	Hpgd	protein_coding	-0.743437	3.02157	-4.87276	1.28914e-05	0.00227748
Mcm5	8	75109569	75128440	+	Mcm5	protein_coding	-0.323188	2.87256	-4.86045	1.34359e-05	0.00234921
Emp2	16	10281749	10313969	-	Emp2	protein_coding	-0.557498	4.78104	-4.84997	1.39168e-05	0.00240847
Gucy2e	11	69218117	69237037	-	Gucy2e	protein_coding	-0.531757	2.87967	-4.84135	1.43257e-05	0.00245417
Rbm8a	3	96629933	96633792	+	Rbm8a	protein_coding	-0.404768	4.77237	-4.79919	1.64995e-05	0.00279832
Dcp1b	6	119175253	119221617	+	Dcp1b	protein_coding	0.512011	3.64413	4.78073	1.75507e-05	0.00292569
Siglech	7	55768178	55778926	+	Siglech	protein_coding	-0.573185	4.26386	-4.77996	1.75955e-05	0.00292569
Hist2h2be	3	96221119	96223739	+	Hist2h2be	protein_coding	-0.635865	3.46356	-4.77645	1.78035e-05	0.00293154
Ccl27b	4	42655251	42656006	+	Ccl27b	protein_coding	-0.548308	3.05616	-4.77049	1.81615e-05	0.00296172
Map7	10	20148471	20281591	+	Map7	protein_coding	0.372042	6.4981	4.76544	1.84707e-05	0.00298346
Rapgef4	2	71981240	72257475	+	Rapgef4	protein_coding	-0.559266	9.12129	-4.74561	1.97348e-05	0.00315757
Mpeg1	19	12460779	12465285	+	Mpeg1	protein_coding	-0.576825	5.63493	-4.72974	2.08074e-05	0.00329807
1700003M07Rik	4	129960374	129963658	+	1700003M07Rik	lincRNA	-0.674862	3.77702	-4.72622	2.1053e-05	0.00330609
Gm14325	2	177831791	177840337	-	Gm14325	protein_coding	-0.532504	4.56039	-4.70866	2.23214e-05	0.00347312
Wnt5b	6	119432531	119544348	-	Wnt5b	protein_coding	-0.534463	1.45343	-4.70564	2.25467e-05	0.00347629
Cbwd1	19	24919916	24961617	-	Cbwd1	protein_coding	-0.625606	3.38714	-4.69667	2.32304e-05	0.00353495
Tnnt1	7	4504570	4516383	-	Tnnt1	protein_coding	0.733025	1.49604	4.6952	2.3344e-05	0.00353495
4932438H23Rik	16	91053935	91095123	-	4932438H23Rik	protein_coding	-0.705496	1.51107	-4.6701	2.53754e-05	0.00380856
Apln	X	48025146	48034854	-	Apln	protein_coding	-0.642826	5.5859	-4.66698	2.56398e-05	0.00381448
Gm14393	2	175061549	175067782	-	Gm14393	protein_coding	-0.38594	0.60479	-4.65869	2.6355e-05	0.00388679
Gm8615	5	149155108	149156210	-	Gm8615	transcribed_processed_pseudogene	-0.720142	3.34245	-4.63873	2.81591e-05	0.00410229
Snhg3	4	132348014	132353687	-	Snhg3	processed_transcript	-0.58101	2.43837	-4.63722	2.83e-05	0.00410229
Gna14	19	16435667	16610819	+	Gna14	protein_coding	0.338042	0.41769	4.62181	2.97824e-05	0.00427516
Ptprn2	12	116485720	117276850	+	Ptprn2	protein_coding	0.491329	8.16609	4.6179	3.01711e-05	0.00427516
Shcbp1l	1	153425162	153452575	+	Shcbp1l	protein_coding	0.495677	1.23402	4.61712	3.02488e-05	0.00427516
Bmf	2	118528757	118549688	-	Bmf	protein_coding	0.663824	2.40879	4.58209	3.3963e-05	0.00476044
Coa5	1	37417084	37430104	-	Coa5	protein_coding	-0.307194	7.33902	-4.56304	3.61679e-05	0.00502793
Asprv1	6	86628164	86629711	+	Asprv1	protein_coding	-0.594857	1.19361	-4.55624	3.69878e-05	0.00510011
Gpi1	7	34201330	34230337	-	Gpi1	protein_coding	0.318557	8.29793	4.54982	3.77791e-05	0.00513861
Ccdc88c	12	100911523	101029057	-	Ccdc88c	protein_coding	0.854795	4.82337	4.54898	3.78827e-05	0.00513861
Hspb6	7	30552178	30555444	+	Hspb6	protein_coding	0.525324	3.31215	4.54609	3.82451e-05	0.00513861
2700046G09Rik	19	32389216	32391185	+	2700046G09Rik	lincRNA	-0.572973	2.13382	-4.54424	3.8479e-05	0.00513861
Med8	4	118409337	118415783	+	Med8	protein_coding	-0.489339	4.52282	-4.50723	4.34617e-05	0.00575867
Col20a1	2	180986535	181018364	+	Col20a1	protein_coding	0.709808	1.43116	4.50447	4.38581e-05	0.00576615
Gbp7	3	142530342	142550150	+	Gbp7	protein_coding	-0.765049	3.0372	-4.49531	4.51972e-05	0.0058965
Upk1a	7	30603092	30612848	-	Upk1a	protein_coding	0.429641	0.551335	4.49164	4.57448e-05	0.00592238
4930481A15Rik	19	5406740	5422848	+	4930481A15Rik	antisense	-0.827122	1.44507	-4.48119	4.73398e-05	0.00608245
Cd40	2	165055627	165072949	+	Cd40	protein_coding	-0.360261	0.438231	-4.46872	4.93155e-05	0.00625678
Glipr2	4	43957401	43979119	+	Glipr2	protein_coding	-0.737357	2.1874	-4.46798	4.94345e-05	0.00625678
Irf6	1	193153111	193172024	+	Irf6	protein_coding	0.493636	1.03509	4.45557	5.14853e-05	0.00646808
Gon4l	3	88835231	88910104	+	Gon4l	protein_coding	0.518498	5.94458	4.42228	5.7406e-05	0.00715887
Xirp2	2	67446002	67526615	+	Xirp2	protein_coding	-0.512548	1.3845	-4.37669	6.66032e-05	0.00824519
Ccl17	8	94810453	94812037	+	Ccl17	protein_coding	-0.791818	1.34673	-4.37364	6.72684e-05	0.00826719
Fcgr2b	1	170958617	170976548	-	Fcgr2b	protein_coding	0.703735	2.65788	4.35806	7.07626e-05	0.00857919
Apoa2	1	171225054	171226380	+	Apoa2	protein_coding	-0.392552	1.06778	-4.35782	7.08188e-05	0.00857919
Klhl7	5	24100605	24160793	+	Klhl7	protein_coding	-0.444243	6.55746	-4.34952	7.27521e-05	0.00863657
Myof	19	37899036	38043578	-	Myof	protein_coding	0.634263	1.84096	4.34926	7.28143e-05	0.00863657
Gemin2	12	59013393	59028471	+	Gemin2	protein_coding	-0.715652	2.51597	-4.34924	7.28202e-05	0.00863657
Tob2	15	81848272	81858797	-	Tob2	protein_coding	0.429895	5.03016	4.33334	7.66753e-05	0.00903064
Hectd3	4	116995317	117005278	+	Hectd3	protein_coding	0.293381	6.0968	4.33119	7.72105e-05	0.00903097
Jph2	2	163336242	163397994	-	Jph2	protein_coding	-0.504397	1.00577	-4.32015	8.0024e-05	0.00929594
Cptp	4	155864723	155869441	-	Cptp	protein_coding	0.339577	4.96456	4.31657	8.09573e-05	0.00934038
Sytl1	4	133253090	133263114	-	Sytl1	protein_coding	0.43902	1.03984	4.30996	8.27086e-05	0.00947171
Pafah2	4	134396320	134427414	+	Pafah2	protein_coding	0.355985	3.36333	4.30808	8.32126e-05	0.00947171
Pcdhb17	18	37484795	37489455	+	Pcdhb17	protein_coding	0.353338	4.6074	4.27494	9.26222e-05	0.0104725
Nuf2	1	169497934	169531465	-	Nuf2	protein_coding	-0.607508	1.73999	-4.25981	9.72526e-05	0.0109232
Kirrel2	7	30447534	30457691	-	Kirrel2	protein_coding	0.652461	3.20462	4.25459	9.89037e-05	0.0109798
Sp7	15	102356606	102367183	-	Sp7	protein_coding	0.836403	1.25227	4.25412	9.90517e-05	0.0109798
A930012L18Rik	18	44661665	44676272	+	A930012L18Rik	antisense	0.729567	1.69395	4.24564	0.000101795	0.011093
Dnd1	18	36763671	36766215	-	Dnd1	protein_coding	0.336776	0.862361	4.24558	0.000101816	0.011093
Proca1	11	78193392	78205764	+	Proca1	protein_coding	-0.624641	2.2423	-4.24491	0.000102034	0.011093
3110045C21Rik	1	169969409	169972397	+	3110045C21Rik	antisense	-0.767504	1.0467	-4.23665	0.000104783	0.0112107
Sccpdh	1	179668210	179687190	+	Sccpdh	protein_coding	-0.355598	6.06801	-4.23612	0.000104963	0.0112107
Muc2	7	141690340	141754694	+	Muc2	protein_coding	0.273448	0.320809	4.23571	0.000105101	0.0112107
Hopx	5	77086988	77115122	-	Hopx	protein_coding	-0.608206	5.05442	-4.22214	0.000109788	0.0116168
Olfml3	3	103722222	103738002	-	Olfml3	protein_coding	-0.529924	4.66283	-4.22075	0.000110278	0.0116168
Fcrls	3	87250758	87263739	-	Fcrls	protein_coding	-0.709194	4.53271	-4.21375	0.000112787	0.0117686
Galc	12	98202294	98259460	-	Galc	protein_coding	0.411938	4.93162	4.21214	0.000113373	0.0117686
Rgs5	1	169655501	169695814	+	Rgs5	protein_coding	-0.400238	7.11589	-4.21096	0.0001138	0.0117686
Khsrp	17	57021051	57031523	-	Khsrp	protein_coding	0.620567	6.10973	4.18092	0.000125306	0.0128087
Gcc1	6	28416091	28428391	-	Gcc1	protein_coding	0.365303	4.66369	4.18076	0.000125368	0.0128087
Chrdl1	X	143285674	143394263	-	Chrdl1	protein_coding	-0.595979	4.84767	-4.17419	0.000128033	0.0130026
Arl3	19	46531109	46573086	-	Arl3	protein_coding	-0.403329	6.05162	-4.15167	0.000137591	0.0138688
Akr1e1	13	4590750	4609175	-	Akr1e1	protein_coding	-0.596939	4.59342	-4.15029	0.000138197	0.0138688
Map3k6	4	133240818	133252930	+	Map3k6	protein_coding	-0.575616	1.97934	-4.13397	0.000145584	0.0145241
Vegfc	8	54077606	54187097	+	Vegfc	protein_coding	-0.63592	1.88832	-4.129	0.000147908	0.0146697
Klhdc1	12	69241176	69284633	+	Klhdc1	protein_coding	-0.669733	3.84405	-4.1258	0.000149427	0.0147114
Spr	6	85130176	85137767	-	Spr	protein_coding	-0.445753	4.3216	-4.12446	0.000150063	0.0147114
Fam205a2	4	42522580	42528176	-	Fam205a2	protein_coding	-0.614008	2.76404	-4.10485	0.000159728	0.0155689
Glul	1	153899944	153909724	+	Glul	protein_coding	-0.328737	11.138	-4.0794	0.000173174	0.0167831
Gys1	7	45434844	45456620	+	Gys1	protein_coding	0.396436	4.43391	4.07381	0.000176274	0.0169864
Trmt1	8	84686307	84699809	+	Trmt1	protein_coding	0.398122	5.00341	4.06828	0.000179389	0.0171728
Mndal	1	173849126	173942492	-	Mndal	protein_coding	-0.446319	0.525739	-4.0668	0.000180233	0.0171728
Ccdc122	14	77036772	77112258	+	Ccdc122	protein_coding	-0.778926	1.62575	-4.06478	0.000181389	0.0171863
Eqtn	4	94907267	94928844	-	Eqtn	protein_coding	0.41154	0.88529	4.05293	0.000188321	0.017744
Pcbp2	15	102470539	102500062	+	Pcbp2	protein_coding	0.243875	6.6259	4.02041	0.000208696	0.0195552
Nrsn1	13	25252040	25270503	-	Nrsn1	protein_coding	-0.353423	9.38625	-4.01695	0.000210991	0.0196616
Tagln	9	45929619	45936059	-	Tagln	protein_coding	-0.967488	2.63073	-4.01406	0.00021292	0.0197329
Vnn1	10	23894688	23905344	+	Vnn1	protein_coding	-0.434441	0.411776	-4.00736	0.000217461	0.0200442
Dio2	12	90724552	90738439	-	Dio2	protein_coding	-0.535151	7.02323	-4.00316	0.000220355	0.0202012
Slc9a2	1	40680574	40769274	+	Slc9a2	protein_coding	0.657479	2.3325	4.00037	0.000222303	0.0202702
S1pr1	3	115710433	115715073	-	S1pr1	protein_coding	-0.271651	8.26765	-3.99132	0.000228722	0.0206497
Hrh3	2	180099465	180104489	-	Hrh3	protein_coding	0.778184	6.77658	3.99107	0.000228899	0.0206497
Bin1	18	32377217	32435737	+	Bin1	protein_coding	0.33729	7.12421	3.98585	0.000232694	0.0208546
Pcdhga6	18	37707039	37841874	+	Pcdhga6	protein_coding	0.429101	5.64605	3.98457	0.00023363	0.0208546
Ddo	10	40630011	40681848	+	Ddo	protein_coding	-0.421578	3.5421	-3.97899	0.000237762	0.0210964
1700093K21Rik	11	23516203	23521156	-	1700093K21Rik	protein_coding	0.226657	0.259106	3.97756	0.000238827	0.0210964
Eif5a2	3	28781276	28798847	+	Eif5a2	protein_coding	-0.423093	6.68452	-3.97339	0.000241976	0.0211604
Aplp1	7	30434982	30445536	-	Aplp1	protein_coding	0.34422	9.95691	3.9733	0.000242047	0.0211604
Pa2g4	10	128557766	128565988	-	Pa2g4	protein_coding	-0.288314	5.90286	-3.96877	0.000245512	0.0213533
Gbp3	3	142560026	142573210	+	Gbp3	protein_coding	-0.644089	2.39377	-3.96033	0.000252102	0.021709
Phf20	2	156196466	156309953	+	Phf20	protein_coding	0.300912	6.39363	3.96025	0.000252162	0.021709
Cdk11b	4	155624854	155649939	+	Cdk11b	protein_coding	0.299445	5.83917	3.94724	0.000262655	0.0224982
Fhdc1	3	84442198	84480430	-	Fhdc1	protein_coding	0.466219	2.88919	3.94399	0.000265338	0.0226137
H60b	10	22158586	22288850	+	H60b	protein_coding	-0.49068	0.797844	-3.93749	0.000270791	0.0229384
Rftn2	1	55170159	55226783	-	Rftn2	protein_coding	-0.337358	5.38513	-3.93624	0.000271852	0.0229384
Insrr	3	87796951	87816102	+	Insrr	protein_coding	0.299777	0.359284	3.93446	0.000273371	0.0229523
Vcam1	3	116109949	116129689	-	Vcam1	protein_coding	-0.52264	5.07032	-3.92723	0.000279618	0.0233612
Dusp19	2	80617045	80632362	+	Dusp19	protein_coding	-0.383414	3.8739	-3.92368	0.000282738	0.0235061
Srp54c	12	55230168	55263837	+	Srp54c	protein_coding	0.324843	5.45989	3.91624	0.000289379	0.0239408
Mchr1	15	81235499	81238965	+	Mchr1	protein_coding	0.347583	5.18714	3.90717	0.000297682	0.0244288
B130034C11Rik	16	87495999	87504034	+	B130034C11Rik	processed_transcript	0.480062	1.34531	3.90666	0.000298158	0.0244288
Bag1	4	40936398	40948295	-	Bag1	protein_coding	-0.360868	6.37572	-3.89466	0.000309514	0.0252373
Kcnk2	1	189207930	189402274	-	Kcnk2	protein_coding	0.424688	6.13471	3.89298	0.000311141	0.0252486
Glud1	14	34310727	34345266	+	Glud1	protein_coding	-0.289031	7.89576	-3.88827	0.000315733	0.0254532
Lrrc42	4	107233514	107253533	-	Lrrc42	protein_coding	0.289345	3.99398	3.88658	0.000317402	0.0254532
Ccsap	8	123840831	123860210	-	Ccsap	protein_coding	0.239581	6.24016	3.88581	0.000318166	0.0254532
Ssc5d	7	4925785	4944827	+	Ssc5d	protein_coding	0.646089	1.72961	3.87851	0.00032547	0.0259154
Gbp2	3	142620602	142638009	+	Gbp2	protein_coding	-0.849595	2.42471	-3.87542	0.000328602	0.0260425
Map2k7	8	4238740	4247898	+	Map2k7	protein_coding	0.252154	6.48621	3.86727	0.000337034	0.026571
Rad52	6	119902698	119922829	+	Rad52	protein_coding	0.448631	3.39777	3.86596	0.000338404	0.026571
Asrgl1	19	9109868	9135637	-	Asrgl1	protein_coding	-0.238307	7.64105	-3.85957	0.000345178	0.026978
Lhfp	3	53041528	53261680	+	Lhfp	protein_coding	-0.363763	4.96656	-3.85718	0.000347755	0.0270547
AW011738	4	156203304	156205152	+	AW011738	protein_coding	-0.535232	1.85281	-3.85544	0.000349637	0.0270769
Efcab7	4	99829198	99912789	+	Efcab7	protein_coding	0.527921	1.52968	3.85257	0.000352752	0.027194
Fancg	4	43002343	43010507	-	Fancg	protein_coding	0.561715	3.29273	3.84547	0.000360609	0.0276739
Capn3	2	120456019	120504914	+	Capn3	protein_coding	-0.571701	2.52588	-3.84299	0.00036339	0.0277549
Slc14a1	18	78100091	78142120	-	Slc14a1	protein_coding	-0.43197	3.80797	-3.84069	0.000365986	0.0277549
Slc6a1	6	114282635	114317533	+	Slc6a1	protein_coding	0.294099	9.03316	3.84017	0.000366574	0.0277549
Ptp4a2	4	129811219	129850004	+	Ptp4a2	protein_coding	-0.271563	7.41288	-3.82653	0.000382366	0.0285329
Wwtr1	3	57455649	57575911	-	Wwtr1	protein_coding	-0.362794	4.58178	-3.82536	0.000383749	0.0285329
Prrt2	7	127017531	127021212	-	Prrt2	protein_coding	0.390253	8.51906	3.82397	0.0003854	0.0285329
9030025P20Rik	17	14978468	14991573	+	9030025P20Rik	protein_coding	-0.3162	2.40182	-3.82372	0.000385704	0.0285329
Hp1bp3	4	138216296	138244684	+	Hp1bp3	protein_coding	-0.281515	7.73564	-3.82294	0.000386632	0.0285329
Crb1	1	139197056	139377101	-	Crb1	protein_coding	0.294145	0.409348	3.82268	0.000386944	0.0285329
Usp2	9	44067021	44095628	+	Usp2	protein_coding	0.366976	6.47358	3.81787	0.000392734	0.0287889
Cftr	6	18170687	18322769	+	Cftr	protein_coding	0.326985	1.11711	3.81699	0.00039381	0.0287889
Mri1	8	84249906	84257327	-	Mri1	protein_coding	0.570595	2.86638	3.80859	0.000404145	0.0293049
1810014B01Rik	10	86685525	86694807	+	1810014B01Rik	transcribed_unprocessed_pseudogene	-0.535184	2.74334	-3.80845	0.000404324	0.0293049
Adi1	12	28675231	28682176	+	Adi1	protein_coding	-0.551636	5.42043	-3.79701	0.000418841	0.0302278
Cacng6	7	3424195	3435668	+	Cacng6	protein_coding	-0.461812	1.05528	-3.79271	0.000424424	0.030438
Slamf9	1	172475358	172478576	+	Slamf9	protein_coding	-0.612149	1.00458	-3.79201	0.000425342	0.030438
Setd4	16	93583457	93604064	-	Setd4	protein_coding	0.384874	2.08101	3.78916	0.00042909	0.030557
Gm20743	1	164863133	164936776	+	Gm20743	processed_transcript	-0.500057	1.18697	-3.78801	0.000430609	0.030557
Ccdc3	2	5137776	5230879	+	Ccdc3	protein_coding	-0.516101	4.75266	-3.78485	0.000434816	0.030727
Amer3	1	34579657	34590945	+	Amer3	protein_coding	0.280552	5.75881	3.77475	0.000448526	0.0315643
Zfp367	13	64133018	64153203	-	Zfp367	protein_coding	-0.400382	5.41451	-3.77315	0.000450739	0.031589
Trhr2	8	122356967	122360747	-	Trhr2	protein_coding	0.62368	1.73136	3.76856	0.000457139	0.0319057
Gnpda1	18	38327558	38339004	-	Gnpda1	protein_coding	0.448137	4.51603	3.75998	0.000469343	0.0326232
Vldlr	19	27216484	27254232	+	Vldlr	protein_coding	0.359175	6.83015	3.75453	0.000477254	0.0330377
Acss1	2	150618105	150668501	-	Acss1	protein_coding	-0.268578	5.04107	-3.74578	0.000490215	0.0337428
Wdr60	12	116206262	116263023	-	Wdr60	protein_coding	0.443734	4.1508	3.74429	0.000492463	0.0337428
Per1	11	69095217	69109961	+	Per1	protein_coding	0.720517	6.03851	3.74366	0.000493408	0.0337428
Il1a	2	129299610	129309973	-	Il1a	protein_coding	-0.546373	1.19906	-3.74207	0.000495818	0.0337714
Gm15787	5	110154400	110176505	-	Gm15787	processed_transcript	0.366524	1.14793	3.74016	0.000498732	0.033834
Mapk4	18	73928486	74065360	-	Mapk4	protein_coding	0.370737	6.81555	3.73697	0.000503617	0.0340293
Pnlip	19	58670365	58681787	+	Pnlip	protein_coding	0.393254	0.854915	3.7239	0.000524147	0.0352317
Cbr3	16	93683215	93690991	+	Cbr3	protein_coding	-0.591652	3.88509	-3.72302	0.000525567	0.0352317
4933408B17Rik	18	34579846	34597469	-	4933408B17Rik	protein_coding	0.388134	0.874305	3.72036	0.000529844	0.0353786
Stmn1	4	134468320	134473844	+	Stmn1	protein_coding	-0.41488	8.23544	-3.71184	0.000543815	0.036169
Pcdhb22	18	37517871	37524480	+	Pcdhb22	protein_coding	0.408964	3.51625	3.70209	0.000560213	0.0369958
Selenbp1	3	94933056	94944759	+	Selenbp1	protein_coding	-0.518601	2.60929	-3.70186	0.000560609	0.0369958
Nit1	1	171338008	171345647	-	Nit1	protein_coding	-0.282389	4.69008	-3.69973	0.000564261	0.0370925
Ss18l1	2	180042509	180070202	+	Ss18l1	protein_coding	0.349992	6.04521	3.69655	0.000569745	0.0373084
Tmem254b	14	26203369	26207042	-	Tmem254b	protein_coding	-0.382571	3.66382	-3.68471	0.000590649	0.0384699
Eno2	6	124760053	124769674	-	Eno2	protein_coding	0.37073	9.86559	3.68395	0.000592019	0.0384699
Slc8a3	12	81197915	81333181	-	Slc8a3	protein_coding	0.456081	5.41411	3.67921	0.000600602	0.0388786
Abcg1	17	31057698	31115778	+	Abcg1	protein_coding	0.283782	6.41896	3.67281	0.000612407	0.0394392
Kit	5	75574916	75656723	+	Kit	protein_coding	0.437263	5.26614	3.672	0.000613911	0.0394392
Syne2	12	75818134	76110927	+	Syne2	protein_coding	0.388448	4.31158	3.66911	0.000619312	0.039636
Hddc3	7	80343104	80350548	+	Hddc3	protein_coding	-0.670219	3.80068	-3.65967	0.000637306	0.0406342
Il21r	7	125603429	125633571	+	Il21r	protein_coding	-0.416134	1.46831	-3.65791	0.000640723	0.0406991
H2-Q1	17	35320405	35325100	+	H2-Q1	protein_coding	-0.244871	1.09455	-3.64624	0.000663772	0.0420058
A930006K02Rik	16	91465025	91470129	+	A930006K02Rik	processed_transcript	0.400182	0.698875	3.64335	0.000669601	0.042074
Usp20	2	30982279	31023587	+	Usp20	protein_coding	0.279337	6.09086	3.64324	0.00066981	0.042074
Gm32014	9	8644073	8740989	-	Gm32014	lincRNA	0.403703	1.01157	3.63565	0.000685376	0.0428929
2810459M11Rik	1	86045863	86055457	+	2810459M11Rik	protein_coding	-0.309389	4.13097	-3.63431	0.000688161	0.0429089
Ncapg2	12	116405402	116463732	+	Ncapg2	protein_coding	-0.466673	2.83422	-3.62638	0.000704834	0.0437875
Luzp2	7	54835498	55268886	+	Luzp2	protein_coding	-0.431695	8.1873	-3.62005	0.000718434	0.0444695
Nupl2	5	24164963	24184014	+	Nupl2	protein_coding	0.535574	3.52128	3.6105	0.000739414	0.0456016
Atg13	2	91674618	91710577	-	Atg13	protein_coding	0.257229	6.53755	3.60855	0.000743765	0.0457038
Gm13306	4	42153436	42158840	+	Gm13306	protein_coding	-0.480566	3.02061	-3.60611	0.00074926	0.0458753
Ankrd40	11	94328001	94341842	+	Ankrd40	protein_coding	-0.224138	7.61487	-3.6035	0.000755175	0.0459176
Ccl28	13	119623819	119654360	+	Ccl28	protein_coding	-0.721411	2.31345	-3.60341	0.000755367	0.0459176
Pcdhb13	18	37442500	37446210	+	Pcdhb13	protein_coding	0.571106	3.25384	3.60087	0.000761171	0.0459695
Gm15545	7	44986900	44994598	+	Gm15545	antisense	0.397011	0.751408	3.59953	0.000764253	0.0459695
Eps8	6	137477245	137654877	-	Eps8	protein_coding	-0.334647	4.87744	-3.59875	0.000766037	0.0459695
Fcgr4	1	171018920	171029762	+	Fcgr4	protein_coding	-0.232539	0.288971	-3.59831	0.000767061	0.0459695
Trim34a	7	104244457	104262235	+	Trim34a	protein_coding	-0.435725	1.44837	-3.59539	0.000773834	0.046212
Btrc	19	45363734	45530014	+	Btrc	protein_coding	0.363597	6.6711	3.5928	0.000779875	0.0463538
Cfl2	12	54858809	54862878	-	Cfl2	protein_coding	-0.367033	6.53538	-3.59196	0.000781833	0.0463538
Zfp365	10	67886103	67912663	-	Zfp365	protein_coding	-0.341729	9.65357	-3.59087	0.000784407	0.0463538
Lix1	17	17402672	17459388	+	Lix1	protein_coding	-0.381954	5.95569	-3.58365	0.000801622	0.0472066
Nol6	4	41114427	41124456	-	Nol6	protein_coding	0.42783	6.76715	3.57835	0.000814457	0.0476075
Cfap74	4	155409190	155466824	+	Cfap74	protein_coding	-0.530638	4.25403	-3.57829	0.000814606	0.0476075
Rab39b	X	75572046	75578232	-	Rab39b	protein_coding	-0.349317	6.39615	-3.57738	0.00081685	0.0476075
Usp30	5	114065461	114124721	+	Usp30	protein_coding	0.236695	5.3992	3.57497	0.000822765	0.047788
C730002L08Rik	19	20534527	20552331	-	C730002L08Rik	antisense	-0.704423	3.90173	-3.57344	0.000826563	0.0478146
Afg3l2	18	67404767	67449167	-	Afg3l2	protein_coding	0.274671	6.3523	3.57251	0.000828861	0.0478146
Kif5b	18	6201002	6242175	-	Kif5b	protein_coding	-0.417474	8.04417	-3.56913	0.000837292	0.0481372
Cdk5r1	11	80477023	80481185	+	Cdk5r1	protein_coding	0.201293	8.57679	3.56601	0.000845174	0.0484262
Zfyve28	5	34194893	34288450	-	Zfyve28	protein_coding	0.36349	5.98946	3.56465	0.000848622	0.04846
Tmco4	4	138972888	139059172	+	Tmco4	protein_coding	-0.520564	2.28376	-3.55964	0.000861438	0.0490268
1700109H08Rik	5	3571566	3584357	+	1700109H08Rik	protein_coding	0.436275	0.531143	3.55369	0.000876923	0.0495999
Zfp534	4	147673502	147702554	-	Zfp534	protein_coding	0.341642	0.57556	3.55284	0.00087916	0.0495999
Galnt16	12	80518277	80630973	+	Galnt16	protein_coding	0.2986	7.36065	3.5517	0.000882157	0.0495999
2010300C02Rik	1	37611677	37720086	-	2010300C02Rik	protein_coding	0.460743	8.23553	3.5513	0.000883206	0.0495999
AW112010	19	11047617	11050567	-	AW112010	lincRNA	-0.446988	1.15231	-3.54825	0.000891291	0.0498888
1110046J04Rik	13	33935567	33960182	+	1110046J04Rik	antisense	-0.529187	1.73938	-3.54645	0.000896099	0.0499929
Itih3	14	30908572	30923761	-	Itih3	protein_coding	-0.570842	4.37013	-3.54497	0.000900074	0.05005
Aldob	4	49535995	49549547	-	Aldob	protein_coding	0.58648	1.54124	3.53829	0.000918228	0.0508927
Batf3	1	191097847	191108946	+	Batf3	protein_coding	0.515188	0.840815	3.53511	0.000926977	0.0509128
Hrh1	6	114397936	114483297	+	Hrh1	protein_coding	-0.493825	4.34407	-3.53494	0.000927434	0.0509128
Gskip	12	105684829	105703024	+	Gskip	protein_coding	-0.27926	5.6441	-3.53488	0.000927597	0.0509128
Rnf6	5	146209192	146221556	-	Rnf6	protein_coding	0.333516	6.43218	3.53007	0.000941015	0.0510778
4930570G19Rik	3	156546753	156561747	-	4930570G19Rik	lincRNA	0.403545	3.86212	3.52906	0.000943847	0.0510778
A230077H06Rik	7	40818476	40900938	-	A230077H06Rik	antisense	0.29895	2.82399	3.52763	0.000947891	0.0510778
Rap2c	X	51003912	51018019	-	Rap2c	protein_coding	-0.390588	5.8259	-3.52757	0.000948067	0.0510778
Fcgr3	1	171051174	171064936	-	Fcgr3	protein_coding	-0.523048	4.19486	-3.5274	0.000948547	0.0510778
Atp4a	7	30712209	30725535	+	Atp4a	protein_coding	0.52261	1.23753	3.52735	0.000948674	0.0510778
Gpc5	14	115092215	116525180	+	Gpc5	protein_coding	-0.268814	5.94552	-3.52311	0.000960748	0.0515642
Aass	6	23072173	23132987	-	Aass	protein_coding	-0.54548	2.62252	-3.5146	0.000985407	0.0527208
Gdf10	14	33923587	33937984	+	Gdf10	protein_coding	0.597407	2.98799	3.50449	0.00101547	0.0541584
Tmem254c	14	26063919	26067356	-	Tmem254c	protein_coding	-0.32796	3.39189	-3.50161	0.00102421	0.0544471
Wls	3	159839672	159938665	+	Wls	protein_coding	-0.361282	5.43548	-3.50059	0.0010273	0.0544471
Tnnc1	14	31208312	31211730	+	Tnnc1	protein_coding	-0.781868	2.74626	-3.4982	0.00103463	0.0546645
Impa2	18	67289253	67319147	+	Impa2	protein_coding	0.508279	1.88111	3.49181	0.00105444	0.0555384
Tbx22	X	107667964	107688979	+	Tbx22	protein_coding	-0.29149	0.48112	-3.48868	0.00106428	0.0558041
Rasgrf1	9	89909908	90026978	+	Rasgrf1	protein_coding	0.432356	8.1021	3.48811	0.00106607	0.0558041
Drosha	15	12824815	12935292	+	Drosha	protein_coding	0.369749	6.09384	3.48578	0.00107348	0.0558576
Pla2g7	17	43568098	43612202	+	Pla2g7	protein_coding	-0.314309	6.96243	-3.48526	0.00107513	0.0558576
Myg1	15	102331709	102338140	+	Myg1	protein_coding	0.40597	4.28808	3.48468	0.00107697	0.0558576
Cln6	9	62838785	62852007	+	Cln6	protein_coding	0.466381	3.89172	3.4835	0.00108074	0.0558762
Htatip2	7	49759115	49773976	+	Htatip2	protein_coding	-0.476351	3.37597	-3.48168	0.00108658	0.0558762
Ctsc	7	88278085	88310889	+	Ctsc	protein_coding	-0.580065	3.35783	-3.48149	0.00108721	0.0558762
Aifm1	X	48474944	48513564	-	Aifm1	protein_coding	0.388792	4.09679	3.47662	0.00110301	0.0560503
Zfp1	8	111643401	111671012	+	Zfp1	protein_coding	0.243273	4.54038	3.47423	0.00111082	0.0560503
B3galt2	1	143640664	143654615	+	B3galt2	protein_coding	-0.517748	6.31707	-3.47407	0.00111135	0.0560503
Cyp4v3	8	45304944	45333217	-	Cyp4v3	protein_coding	-0.321068	3.454	-3.47386	0.00111203	0.0560503
Mkrn2os	6	115583544	115592577	-	Mkrn2os	protein_coding	0.623733	1.68597	3.47329	0.00111392	0.0560503
Hint3	10	30608141	30629633	-	Hint3	protein_coding	-0.429212	2.35097	-3.47291	0.00111519	0.0560503
Rab29	1	131867224	131872888	+	Rab29	protein_coding	-0.432283	1.96136	-3.47272	0.00111579	0.0560503
Plk4	3	40800019	40816884	+	Plk4	protein_coding	-0.515672	2.47402	-3.47234	0.00111704	0.0560503
Vamp4	1	162570515	162599085	+	Vamp4	protein_coding	-0.337505	5.96844	-3.4713	0.00112051	0.0560584
Kcnip2	19	45791839	45816062	-	Kcnip2	protein_coding	0.468095	7.39413	3.46993	0.00112506	0.0561208
Dennd1a	2	37798991	38287391	-	Dennd1a	protein_coding	0.440871	5.83284	3.46809	0.0011312	0.0562612
Tmem30a	9	79768943	79793508	-	Tmem30a	protein_coding	-0.400718	9.18972	-3.46548	0.00113997	0.0565317
Ctss	3	95526786	95556404	+	Ctss	protein_coding	-0.428978	6.21571	-3.46335	0.00114714	0.0566872
Fam149a	8	45336717	45382292	-	Fam149a	protein_coding	-0.390445	5.07632	-3.46199	0.00115176	0.0566872
Dhx37	5	125413858	125434122	-	Dhx37	protein_coding	0.368516	3.57972	3.45995	0.00115875	0.0566872
Adamts4	1	171250421	171260638	+	Adamts4	protein_coding	-0.678199	3.98182	-3.45971	0.00115957	0.0566872
Abca2	2	25428703	25448541	+	Abca2	protein_coding	0.490104	7.84113	3.45963	0.00115982	0.0566872
Aldh3b1	19	3913493	3929762	-	Aldh3b1	protein_coding	-0.397827	2.34232	-3.45525	0.00117492	0.0569804
Tmbim1	1	74288247	74305623	-	Tmbim1	protein_coding	-0.336806	5.28832	-3.45506	0.0011756	0.0569804
Ciart	3	95878503	95882252	-	Ciart	protein_coding	0.688718	3.76941	3.45497	0.00117589	0.0569804
Rpgrip1l	8	91217030	91313263	-	Rpgrip1l	protein_coding	-0.343462	5.07082	-3.4524	0.00118487	0.0572517
Ephx2	14	66084374	66124501	-	Ephx2	protein_coding	-0.423825	4.07332	-3.45124	0.00118893	0.0572846
Col11a2	17	34039437	34066686	+	Col11a2	protein_coding	0.71059	3.47269	3.4471	0.00120352	0.0577725
Plac9a	14	25887506	25903101	-	Plac9a	protein_coding	-0.422396	0.815493	-3.44644	0.00120586	0.0577725
Abca8a	11	110025634	110095979	-	Abca8a	protein_coding	-0.49464	3.11909	-3.43535	0.00124593	0.0594799
Kcnj10	1	172341210	172374086	+	Kcnj10	protein_coding	0.396357	8.60067	3.43464	0.00124852	0.0594799
Fam126b	1	58522806	58586324	-	Fam126b	protein_coding	-0.43332	7.33605	-3.42719	0.00127619	0.0606278
Eepd1	9	25481547	25604111	+	Eepd1	protein_coding	0.311133	4.83053	3.42605	0.00128049	0.0606625
Gmfb	14	46808149	46822243	-	Gmfb	protein_coding	-0.267598	7.85662	-3.4237	0.00128935	0.0607901
Wars2	3	99141068	99239187	+	Wars2	protein_coding	0.498879	3.3898	3.42344	0.00129036	0.0607901
Elovl5	9	77917364	77984520	+	Elovl5	protein_coding	-0.293116	6.74983	-3.42011	0.00130305	0.0611376
Cnga2	X	71991849	72010219	+	Cnga2	protein_coding	0.403348	0.51418	3.41896	0.00130743	0.0611376
Fam205a1	4	42848071	42853889	-	Fam205a1	protein_coding	-0.515413	2.39049	-3.41867	0.00130855	0.0611376
Manea	4	26324506	26346892	-	Manea	protein_coding	-0.371912	6.10775	-3.41672	0.00131605	0.0613194
Mtcl1	17	66336982	66449751	-	Mtcl1	protein_coding	0.513183	6.46773	3.41364	0.00132802	0.0617075
Fra10ac1	19	38188481	38224139	-	Fra10ac1	protein_coding	-0.400123	2.9261	-3.40738	0.00135262	0.0626695
Sdhaf2	19	10500513	10525210	-	Sdhaf2	protein_coding	-0.285378	5.92815	-3.40561	0.0013597	0.0626695
Cyp20a1	1	60343323	60388061	+	Cyp20a1	protein_coding	-0.387792	3.35675	-3.40558	0.00135981	0.0626695
Emilin2	17	71252172	71311979	-	Emilin2	protein_coding	0.492566	2.32849	3.40427	0.00136503	0.0627394
Mast1	8	84911903	84937360	-	Mast1	protein_coding	0.586211	6.09552	3.39967	0.00138354	0.0629795
Smpdl3b	4	132732966	132757253	-	Smpdl3b	protein_coding	0.612271	2.00483	3.39924	0.00138529	0.0629795
Gm10421	12	117144530	117151652	-	Gm10421	processed_transcript	-0.615091	1.14215	-3.39877	0.00138722	0.0629795
Tlr3	8	45395665	45411081	-	Tlr3	protein_coding	-0.405164	4.2484	-3.39773	0.00139143	0.0629795
Srpk3	X	73774405	73778926	+	Srpk3	protein_coding	0.455663	2.08764	3.39768	0.00139164	0.0629795
Nupr1	7	126623249	126630862	-	Nupr1	protein_coding	-0.585953	3.07098	-3.39595	0.00139872	0.0629795
Fbxo33	12	59200655	59219726	-	Fbxo33	protein_coding	-0.332345	6.22844	-3.39594	0.00139873	0.0629795
Capza1	3	104822779	104864506	-	Capza1	protein_coding	-0.32137	4.89858	-3.39442	0.00140497	0.0629795
Prdx6b	2	80292472	80295357	+	Prdx6b	protein_coding	-0.334488	5.51131	-3.39389	0.00140715	0.0629795
Rrp12	19	41862852	41896154	-	Rrp12	protein_coding	0.338129	4.64365	3.39314	0.00141026	0.0629795
Ufc1	1	171288563	171295025	-	Ufc1	protein_coding	-0.415271	5.29144	-3.39135	0.00141766	0.0629795
Slc6a16	7	45241085	45273368	+	Slc6a16	protein_coding	0.588445	1.0176	3.39117	0.00141842	0.0629795
Txlnb	10	17796226	17845666	+	Txlnb	protein_coding	-0.491494	1.83972	-3.39114	0.00141852	0.0629795
Gbp6	5	105270702	105293699	-	Gbp6	protein_coding	-0.543543	1.66259	-3.38829	0.00143041	0.0633415
Tut1	19	8953850	8966208	+	Tut1	protein_coding	0.316493	4.79864	3.38377	0.00144943	0.0640164
Plekhd1	12	80692591	80724215	+	Plekhd1	protein_coding	0.543807	2.50142	3.38006	0.00146524	0.0644799
A230056P14Rik	7	55962531	55980869	+	A230056P14Rik	processed_transcript	-0.427871	3.55429	-3.37953	0.00146753	0.0644799
Phf21b	15	84785381	84856050	-	Phf21b	protein_coding	0.518515	3.36129	3.37851	0.00147188	0.064504
Rps11	7	45122379	45124440	-	Rps11	protein_coding	-0.513594	5.36262	-3.37717	0.00147765	0.0645902
Atg7	6	114643097	114860615	+	Atg7	protein_coding	0.31297	4.95021	3.3736	0.00149315	0.0650998
Ap4b1	3	103809520	103822026	+	Ap4b1	protein_coding	-0.370028	3.96426	-3.37149	0.00150236	0.0651581
Irgm2	11	58199618	58222783	+	Irgm2	protein_coding	-0.477333	2.46195	-3.37003	0.00150876	0.0651581
2900076A07Rik	7	81523550	81531499	+	2900076A07Rik	lincRNA	-0.484042	1.8071	-3.37003	0.00150879	0.0651581
Me1	9	86581371	86695954	-	Me1	protein_coding	-0.400542	5.51774	-3.36978	0.00150985	0.0651581
Prdx6	1	161240112	161251220	-	Prdx6	protein_coding	-0.30107	7.58488	-3.36826	0.0015166	0.0652831
Eif2ak2	17	78852564	78882574	-	Eif2ak2	protein_coding	-0.600508	2.86631	-3.36705	0.00152194	0.0653471
Msmo1	8	64718139	64733793	-	Msmo1	protein_coding	-0.308511	6.86767	-3.36519	0.00153023	0.0655104
Gm11110	17	57091370	57105943	-	Gm11110	lincRNA	-0.334788	0.74743	-3.36446	0.00153347	0.0655104
Hyi	4	118359990	118362745	+	Hyi	polymorphic_pseudogene	-0.448409	1.86809	-3.36021	0.00155256	0.0659499
Ticam1	17	56269319	56276787	-	Ticam1	protein_coding	0.3731	3.42035	3.35998	0.0015536	0.0659499
Gm10767	13	66904914	66909237	+	Gm10767	protein_coding	-0.466073	3.01104	-3.35958	0.00155542	0.0659499
Pcdhb15	18	37473540	37476341	+	Pcdhb15	protein_coding	0.516987	2.28702	3.35672	0.00156843	0.0663356
Lcp1	14	75131101	75230843	+	Lcp1	protein_coding	-0.466956	3.61676	-3.35165	0.00159174	0.0669057
Map1a	2	121289600	121310833	+	Map1a	protein_coding	0.513805	10.7889	3.3515	0.00159245	0.0669057
Ifi27	12	103434211	103440240	+	Ifi27	protein_coding	-0.514154	4.31527	-3.35094	0.00159503	0.0669057
Rnf40	7	127588767	127604800	+	Rnf40	protein_coding	0.324981	5.83372	3.35037	0.00159769	0.0669057
Maged1	X	94535474	94542144	-	Maged1	protein_coding	0.25626	8.81406	3.34727	0.00161215	0.0670379
Phyhip	14	70457476	70468833	+	Phyhip	protein_coding	0.38898	9.43294	3.34653	0.00161562	0.0670379
Ptk2b	14	66153257	66281053	-	Ptk2b	protein_coding	0.254561	8.52809	3.3463	0.00161672	0.0670379
Slc39a12	2	14388316	14494978	+	Slc39a12	protein_coding	-0.411716	5.80494	-3.34609	0.00161768	0.0670379
Per3	4	151003652	151044666	-	Per3	protein_coding	0.47636	5.76161	3.3452	0.00162187	0.0670379
Cd38	5	43868553	43912376	+	Cd38	protein_coding	-0.565485	2.08605	-3.34463	0.00162456	0.0670379
Gramd3	18	56432132	56503793	+	Gramd3	protein_coding	-0.36417	4.20089	-3.34267	0.00163386	0.0672397
Nfyc	4	120757438	120831573	-	Nfyc	protein_coding	0.254416	4.35124	3.34193	0.00163738	0.0672397
Cttn	7	144435733	144471010	-	Cttn	protein_coding	0.280851	6.4727	3.33823	0.00165505	0.0676846
Rere	4	150281646	150621967	+	Rere	protein_coding	0.481394	7.00143	3.33799	0.0016562	0.0676846
S100a16	3	90537254	90543152	+	S100a16	protein_coding	-0.457819	6.09504	-3.33462	0.00167249	0.0677951
F2rl3	8	72761880	72763875	+	F2rl3	protein_coding	0.261135	0.504866	3.33424	0.00167435	0.0677951
2900097C17Rik	2	156388065	156392980	-	2900097C17Rik	lincRNA	-0.17643	10.5126	-3.33341	0.00167838	0.0677951
Tmsb15b1	X	136974022	136976875	-	Tmsb15b1	protein_coding	-0.434883	1.37131	-3.3334	0.00167843	0.0677951
Mr1	1	155127277	155146815	-	Mr1	protein_coding	-0.431787	3.16982	-3.33331	0.00167889	0.0677951
Egfl7	2	26580014	26593121	+	Egfl7	protein_coding	-0.530766	3.85125	-3.33151	0.00168764	0.0678364
Pot1b	17	55651951	55712629	-	Pot1b	protein_coding	0.686224	2.59921	3.33141	0.00168812	0.0678364
Fxr2	11	69632990	69653298	+	Fxr2	protein_coding	0.359693	6.88036	3.33059	0.00169214	0.0678364
Snupn	9	56950878	56983207	+	Snupn	protein_coding	-0.324093	3.79219	-3.32952	0.00169744	0.0678364
Cbx4	11	119077573	119086222	-	Cbx4	protein_coding	0.343545	5.31806	3.32901	0.00169991	0.0678364
Mzt1	14	99034544	99046135	-	Mzt1	protein_coding	-0.352974	6.89055	-3.32806	0.00170461	0.0678644
Clcn6	4	148004259	148038822	-	Clcn6	protein_coding	0.432722	6.85182	3.32725	0.00170864	0.0678654
C3ar1	6	122847138	122856162	-	C3ar1	protein_coding	-0.554785	2.33466	-3.32369	0.00172636	0.0682108
Pfdn2	1	171345670	171359255	+	Pfdn2	protein_coding	-0.293424	5.97552	-3.323	0.00172979	0.0682108
Cav2	6	17281185	17289116	+	Cav2	protein_coding	-0.478543	5.7472	-3.32245	0.00173257	0.0682108
Atxn1	13	45549755	45965009	-	Atxn1	protein_coding	0.406751	6.95692	3.32145	0.00173761	0.0682108
Anxa3	5	96793339	96845967	+	Anxa3	protein_coding	-0.443349	2.7823	-3.32091	0.00174032	0.0682108
Setd1b	5	123142193	123168630	+	Setd1b	protein_coding	0.645702	5.24062	3.32068	0.00174147	0.0682108
Mxra8	4	155839680	155844089	+	Mxra8	protein_coding	0.610316	2.16894	3.31886	0.00175068	0.0682568
Rps6kc1	1	190700202	190911771	-	Rps6kc1	protein_coding	0.362436	5.69328	3.31797	0.0017552	0.0682568
Vti1a	19	55316295	55627310	+	Vti1a	protein_coding	-0.313893	6.5488	-3.31733	0.00175842	0.0682568
Elf5	2	103411688	103450990	+	Elf5	protein_coding	-0.296351	0.632297	-3.31727	0.00175874	0.0682568
Cecr2	6	120666369	120771191	+	Cecr2	protein_coding	0.693702	2.47531	3.31423	0.00177427	0.0687025
Sap130	18	31634371	31723062	+	Sap130	protein_coding	0.326713	5.4555	3.31236	0.00178392	0.0688699
Il33	19	29925114	29960719	+	Il33	protein_coding	-0.401609	6.291	-3.3114	0.00178884	0.0688699
Tspan7	X	10485158	10596606	+	Tspan7	protein_coding	-0.188904	10.4718	-3.31097	0.00179109	0.0688699
Smoc1	12	81026808	81186415	+	Smoc1	protein_coding	0.505944	3.42721	3.30991	0.00179661	0.0688699
Cnnm1	19	43440436	43497211	+	Cnnm1	protein_coding	0.439707	7.29687	3.30945	0.00179898	0.0688699
Dnajb3	1	88204732	88205783	-	Dnajb3	protein_coding	-0.580221	1.19505	-3.30869	0.00180296	0.0688699
Ccdc30	4	119322893	119415522	-	Ccdc30	protein_coding	0.293467	3.23172	3.30707	0.00181139	0.0690362
Sppl3	5	115011137	115098791	+	Sppl3	protein_coding	0.287874	6.12296	3.29947	0.0018516	0.0702297
Larp7	3	127536714	127553350	-	Larp7	protein_coding	0.313694	3.84672	3.29828	0.001858	0.0702297
Neurl3	1	36264597	36274680	-	Neurl3	protein_coding	-0.438756	1.0956	-3.29796	0.00185972	0.0702297
Wipf3	6	54429603	54503769	+	Wipf3	protein_coding	0.474873	7.33155	3.29795	0.00185976	0.0702297
Vwa5a	9	38718268	38743338	+	Vwa5a	protein_coding	-0.392938	4.23323	-3.29656	0.00186721	0.0702297
Slc9a1	4	133369706	133423703	+	Slc9a1	protein_coding	0.577823	5.81713	3.2965	0.00186755	0.0702297
Strn4	7	16815889	16840932	+	Strn4	protein_coding	0.363828	7.70359	3.29434	0.00187922	0.0703812
Mcu	10	59446984	59616693	-	Mcu	protein_coding	0.257821	5.09693	3.29422	0.00187988	0.0703812
Popdc2	16	38362209	38378217	+	Popdc2	protein_coding	0.266777	0.404175	3.29086	0.00189818	0.07091
Olfr78	7	102738511	102759472	-	Olfr78	protein_coding	0.632826	2.07449	3.28841	0.0019116	0.0712124
Tmem47	X	81070698	81097873	+	Tmem47	protein_coding	-0.364563	7.46616	-3.28786	0.00191467	0.0712124
Lxn	3	67457998	67463927	-	Lxn	protein_coding	-0.376341	5.12867	-3.28687	0.00192013	0.0712592
Camk2b	11	5969644	6066363	-	Camk2b	protein_coding	0.315453	9.57853	3.28583	0.00192589	0.0713169
Max	12	76937269	76962202	-	Max	protein_coding	0.214103	5.9463	3.28304	0.00194144	0.0716886
Ciita	16	10480059	10528419	+	Ciita	protein_coding	0.33846	0.767596	3.28251	0.00194439	0.0716886
Ercc6l	X	102141716	102157092	-	Ercc6l	protein_coding	-0.219568	0.301353	-3.28034	0.00195657	0.0718815
Wscd2	5	113490333	113589726	+	Wscd2	protein_coding	0.431963	5.56169	3.27908	0.00196367	0.0718815
Csf2ra	19	61224402	61228419	-	Csf2ra	protein_coding	0.486007	4.07796	3.27749	0.00197268	0.0718815
Aldh9a1	1	167349991	167368533	+	Aldh9a1	protein_coding	-0.274696	5.27497	-3.27727	0.00197393	0.0718815
Isg15	4	156199424	156200819	-	Isg15	protein_coding	-0.38813	1.3529	-3.27718	0.00197446	0.0718815
H2-Q4	17	35379617	35385291	+	H2-Q4	protein_coding	-0.626052	2.24097	-3.27671	0.00197714	0.0718815
Zcchc7	4	44755877	44932216	+	Zcchc7	protein_coding	0.413961	5.0362	3.27633	0.00197928	0.0718815
Gdap1	1	17145362	17164272	+	Gdap1	protein_coding	-0.240101	7.56178	-3.27478	0.00198811	0.0720478
Egr1	18	34859823	34864985	+	Egr1	protein_coding	0.521087	8.39645	3.27379	0.00199381	0.0721001
1700086O06Rik	18	38238405	38250566	-	1700086O06Rik	lincRNA	-0.521105	2.12741	-3.27044	0.00201308	0.0726423
Atp5g2	15	102662864	102672353	-	Atp5g2	protein_coding	-0.327616	4.04628	-3.26878	0.00202274	0.0728357
Gm20939	17	94873986	94877498	+	Gm20939	protein_coding	-0.42657	1.85563	-3.26742	0.00203066	0.0729484
BC028528	3	95883954	95892006	-	BC028528	protein_coding	-0.359697	0.739657	-3.26676	0.00203447	0.0729484
Chrm1	19	8663789	8683588	+	Chrm1	protein_coding	0.379188	7.70916	3.26593	0.00203936	0.0729697
Acot1	12	84009490	84018372	+	Acot1	protein_coding	-0.315103	3.29503	-3.26369	0.00205252	0.0732859
Sdcbp	4	6365650	6408424	+	Sdcbp	protein_coding	-0.341913	7.58618	-3.25993	0.00207479	0.0734961
Rpl31-ps12	16	16819749	16820124	-	Rpl31-ps12	processed_pseudogene	-0.466676	4.99605	-3.25953	0.00207716	0.0734961
Smim13	13	41249844	41276578	+	Smim13	protein_coding	-0.282366	8.60921	-3.259	0.00208034	0.0734961
Kbtbd7	14	79426511	79431037	+	Kbtbd7	protein_coding	-0.335407	6.09316	-3.25873	0.0020819	0.0734961
Gabra3	X	72432681	72656849	-	Gabra3	protein_coding	-0.340801	8.03987	-3.25842	0.00208379	0.0734961
Cetn2	X	72913532	72918412	-	Cetn2	protein_coding	-0.329677	5.29903	-3.25776	0.00208773	0.0734961
Tigd4	3	84593574	84597033	+	Tigd4	protein_coding	0.137979	0.17971	3.25759	0.00208875	0.0734961
Tmem167	13	90089123	90143908	+	Tmem167	protein_coding	-0.353059	6.35604	-3.2549	0.00210493	0.0739122
Fam32a	8	72219730	72224419	+	Fam32a	protein_coding	-0.288986	6.6999	-3.25402	0.00211022	0.073945
Ccr1	9	123962124	123968693	-	Ccr1	protein_coding	-0.315141	0.681722	-3.25137	0.00212632	0.0740417
Smpdl3a	10	57794335	57811831	+	Smpdl3a	protein_coding	-0.373387	5.12005	-3.25013	0.00213387	0.0740417
Ugp2	11	21321138	21371202	-	Ugp2	protein_coding	-0.365565	6.46278	-3.24974	0.00213628	0.0740417
Plec	15	76170974	76232575	-	Plec	protein_coding	0.866696	6.36187	3.24942	0.00213826	0.0740417
Cdkn2c	4	109660876	109667190	-	Cdkn2c	protein_coding	-0.513059	2.00907	-3.24882	0.00214194	0.0740417
Mfap3l	8	60632827	60676730	+	Mfap3l	protein_coding	-0.352866	6.70341	-3.24811	0.00214625	0.0740417
Fgfrl1	5	108692382	108706925	+	Fgfrl1	protein_coding	-0.401005	4.17188	-3.24788	0.00214767	0.0740417
Cdr2l	11	115381916	115396133	+	Cdr2l	protein_coding	0.455665	5.01442	3.24785	0.00214791	0.0740417
Oas2	5	120730333	120749854	-	Oas2	protein_coding	-0.394247	0.58943	-3.24637	0.00215699	0.0741555
Cnn3	3	121426497	121458208	+	Cnn3	protein_coding	-0.262396	5.77133	-3.24531	0.00216356	0.0741555
Snx16	3	10417817	10440103	-	Snx16	protein_coding	-0.390473	5.34519	-3.24451	0.00216852	0.0741555
Vhl	6	113623959	113631634	+	Vhl	protein_coding	-0.328586	6.10914	-3.24448	0.0021687	0.0741555
Rnasel	1	153749426	153764222	+	Rnasel	protein_coding	-0.713449	3.63655	-3.24225	0.00218258	0.0744025
Bcap29	12	31590967	31634659	-	Bcap29	protein_coding	-0.397012	5.79093	-3.24115	0.00218944	0.0744025
Ids	X	70343069	70365085	-	Ids	protein_coding	-0.32445	9.60691	-3.24053	0.00219335	0.0744025
Yae1d1	13	17981330	17993350	-	Yae1d1	protein_coding	-0.316744	5.07926	-3.24051	0.00219347	0.0744025
Sfrp1	8	23411502	23449633	+	Sfrp1	protein_coding	0.376714	4.58185	3.2374	0.0022131	0.0744867
Pip5k1b	19	24294794	24555873	-	Pip5k1b	protein_coding	0.418034	4.22964	3.23721	0.00221428	0.0744867
Ybx1	4	119277981	119294605	-	Ybx1	protein_coding	-0.46264	5.73353	-3.23595	0.00222227	0.0744867
Bmpr1b	3	141837136	142169426	-	Bmpr1b	protein_coding	-0.37756	5.23011	-3.23567	0.00222408	0.0744867
Lingo2	4	35706647	36951748	-	Lingo2	protein_coding	0.346152	4.66212	3.23538	0.00222591	0.0744867
Gimap6	6	48701582	48708226	-	Gimap6	protein_coding	-0.471215	2.40409	-3.23456	0.00223111	0.0744867
Cd63	10	128900989	128912823	+	Cd63	protein_coding	-0.411513	4.41778	-3.23426	0.00223301	0.0744867
Actr1a	19	46376814	46395736	-	Actr1a	protein_coding	0.187875	8.00042	3.23408	0.00223418	0.0744867
Dcaf8	1	172148084	172197006	+	Dcaf8	protein_coding	-0.225907	7.34649	-3.23347	0.00223806	0.0744867
Fam172a	13	77702033	78166236	+	Fam172a	protein_coding	-0.284694	5.5267	-3.23253	0.00224408	0.0744867
A330093E20Rik	18	45683487	45896510	-	A330093E20Rik	antisense	0.599612	1.5778	3.23238	0.00224506	0.0744867
Sufu	19	46396896	46488805	+	Sufu	protein_coding	0.458227	4.23206	3.23182	0.00224866	0.0744867
Dnajc11	4	151933691	151982138	+	Dnajc11	protein_coding	0.259546	5.75746	3.23063	0.00225635	0.0745879
H2-K1	17	33996017	34000334	-	H2-K1	protein_coding	-0.423329	4.78583	-3.22998	0.00226051	0.0745879
Cbx2	11	119022962	119031271	+	Cbx2	protein_coding	0.575683	2.02417	3.22859	0.0022695	0.0747391
Zer1	2	30097283	30124586	-	Zer1	protein_coding	0.372448	7.45939	3.22699	0.00227987	0.0749353
Prr36	8	4209543	4217460	-	Prr36	protein_coding	0.495339	5.51277	3.226	0.00228635	0.0750027
Sez6l2	7	126950563	126970607	+	Sez6l2	protein_coding	0.385193	7.74641	3.22294	0.00230637	0.075325
Ints5	19	8892987	8897891	+	Ints5	protein_coding	0.239458	4.78943	3.22262	0.00230848	0.075325
Rasgrf2	13	91880400	92131657	-	Rasgrf2	protein_coding	0.417076	7.71597	3.22247	0.00230949	0.075325
Sv2a	3	96181151	96195522	+	Sv2a	protein_coding	0.292066	9.05995	3.22016	0.00232473	0.0756764
Fzd7	1	59482424	59486956	+	Fzd7	protein_coding	0.43028	3.20789	3.21875	0.00233413	0.075837
Btbd1	7	81792074	81829432	-	Btbd1	protein_coding	-0.302939	6.9419	-3.21626	0.00235072	0.0762298
Tm9sf3	19	41210842	41264005	-	Tm9sf3	protein_coding	-0.279452	7.85973	-3.21521	0.0023578	0.0763134
Aim2	1	173350879	173466041	+	Aim2	protein_coding	0.40315	1.51615	3.21439	0.00236328	0.0763452
Ik	18	36744656	36757640	+	Ik	protein_coding	0.263699	6.10729	3.20936	0.00239743	0.0773011
Setd1a	7	127776670	127800123	+	Setd1a	protein_coding	0.537268	5.82188	3.20702	0.00241341	0.0774403
Ctdp1	18	80407959	80469696	-	Ctdp1	protein_coding	0.265935	4.13995	3.20701	0.00241351	0.0774403
Cacna1i	15	80287238	80398280	+	Cacna1i	protein_coding	0.518362	6.6864	3.20673	0.00241544	0.0774403
Zswim8	14	20707552	20723620	+	Zswim8	protein_coding	0.469082	6.29864	3.2056	0.00242319	0.0775422
Cherp	8	72460489	72475227	-	Cherp	protein_coding	0.376022	5.48001	3.204	0.00243424	0.0776987
Lap3	5	45493374	45512692	+	Lap3	protein_coding	-0.341706	5.79223	-3.20357	0.00243725	0.0776987
Mfsd2b	12	4862440	4874360	-	Mfsd2b	protein_coding	0.46896	1.09581	3.20028	0.00246017	0.0782822
Gm2381	7	42816829	42867235	-	Gm2381	protein_coding	0.327947	0.354203	3.19844	0.00247303	0.0785441
Col11a1	3	114030540	114220719	+	Col11a1	protein_coding	0.651193	2.89559	3.19668	0.00248544	0.0786003
Nmi	2	51948487	51973495	-	Nmi	protein_coding	-0.418614	1.93426	-3.19642	0.0024873	0.0786003
Vps35	8	85260392	85299803	-	Vps35	protein_coding	-0.255666	7.751	-3.19622	0.0024887	0.0786003
Fcer1g	1	171229572	171234366	-	Fcer1g	protein_coding	-0.538986	3.29971	-3.1922	0.00251724	0.079354
Arhgap33	7	30522226	30535061	-	Arhgap33	protein_coding	0.739551	7.00731	3.18841	0.00254451	0.0799812
Akap17b	X	36608314	36645396	-	Akap17b	protein_coding	0.335261	5.02371	3.18745	0.00255143	0.0799812
Cda	4	138338424	138367993	-	Cda	protein_coding	-0.496355	1.09467	-3.18719	0.00255334	0.0799812
Utp15	13	98246845	98263042	-	Utp15	protein_coding	0.324066	4.95178	3.18682	0.002556	0.0799812
Pkd1l2	8	116995679	117082450	-	Pkd1l2	protein_coding	0.173173	0.507979	3.18566	0.00256442	0.080033
Laptm4a	12	8921664	8938743	+	Laptm4a	protein_coding	-0.278576	7.68207	-3.18529	0.0025671	0.080033
Ypel4	2	84734058	84738656	+	Ypel4	protein_coding	0.482544	4.60369	3.1841	0.00257576	0.0801248
Gpatch3	4	133574745	133584244	+	Gpatch3	protein_coding	0.380603	2.6616	3.18359	0.00257949	0.0801248
Apc2	10	80295977	80318264	+	Apc2	protein_coding	0.688353	6.82903	3.18274	0.00258574	0.0801524
Slc9a6	X	56609757	56664231	+	Slc9a6	protein_coding	-0.242661	7.34327	-3.18218	0.00258983	0.0801524
Sri	5	8046078	8069380	+	Sri	protein_coding	-0.327778	5.89736	-3.1805	0.00260222	0.0803891
Tmem229a	6	24951141	24956298	-	Tmem229a	protein_coding	-0.303818	6.604	-3.17972	0.002608	0.0804212
Tnfrsf19	14	60963875	61046491	-	Tnfrsf19	protein_coding	-0.296252	6.4483	-3.17889	0.00261411	0.0804635
Myrf	19	10208272	10240749	-	Myrf	protein_coding	0.489081	5.74851	3.17713	0.00262716	0.0806179
Teddm2	1	153849542	153900229	-	Teddm2	protein_coding	-0.642762	1.35873	-3.17693	0.00262864	0.0806179
Amh	10	80805243	80807649	+	Amh	protein_coding	0.295961	0.438382	3.17408	0.00264997	0.0811255
Lactb2	1	13623330	13660547	-	Lactb2	protein_coding	-0.293465	4.08066	-3.17302	0.0026579	0.0812216
Cx3cl1	8	94772009	94782428	+	Cx3cl1	protein_coding	0.354231	9.8905	3.17116	0.00267192	0.0814092
Fa2h	8	111345135	111393825	-	Fa2h	protein_coding	0.430358	5.44619	3.17094	0.00267364	0.0814092
Ehd3	17	73804134	73832095	+	Ehd3	protein_coding	0.354714	7.15309	3.16949	0.00268459	0.0814399
Msi2	11	88339382	88718514	-	Msi2	protein_coding	-0.23764	7.15203	-3.16798	0.00269612	0.0814399
Grin1	2	25291181	25319188	-	Grin1	protein_coding	0.504749	7.98809	3.1678	0.00269748	0.0814399
Upf1	8	70331525	70353279	-	Upf1	protein_coding	0.33924	5.44204	3.167	0.00270356	0.0814399
Iqsec2	X	152144268	152225237	+	Iqsec2	protein_coding	0.497214	7.61422	3.1669	0.00270433	0.0814399
Map2	1	66175273	66442584	+	Map2	protein_coding	-0.339618	10.168	-3.16681	0.00270502	0.0814399
Mtus2	5	147957320	148316066	+	Mtus2	protein_coding	0.379579	6.12462	3.16639	0.00270826	0.0814399
2700049A03Rik	12	71136848	71243304	+	2700049A03Rik	protein_coding	0.628315	2.90985	3.16518	0.00271752	0.0814444
Wnt10b	15	98770712	98778151	-	Wnt10b	protein_coding	0.327916	1.107	3.16494	0.00271937	0.0814444
Mkl1	15	81012281	81190758	-	Mkl1	protein_coding	0.458046	5.81787	3.16353	0.00273024	0.0814444
Lingo3	10	80832801	80844040	-	Lingo3	protein_coding	0.515979	5.63599	3.16304	0.002734	0.0814444
Tmem123	9	7764041	7794334	+	Tmem123	protein_coding	-0.433071	4.2103	-3.16233	0.00273947	0.0814444
Hapln1	13	89539796	89611653	+	Hapln1	protein_coding	-0.416556	5.18001	-3.16193	0.0027426	0.0814444
Scn1a	2	66270778	66440841	-	Scn1a	protein_coding	0.40122	7.65555	3.16156	0.00274544	0.0814444
Ndufa8	2	36036326	36049407	-	Ndufa8	protein_coding	-0.311248	6.8333	-3.16139	0.00274683	0.0814444
Rp2	X	20364481	20405654	+	Rp2	protein_coding	-0.405929	4.16105	-3.16039	0.00275457	0.0815315
Clip3	7	30291728	30308368	+	Clip3	protein_coding	0.447173	9.25385	3.15659	0.00278426	0.0822667
Pou3f1	4	124656807	124660656	+	Pou3f1	protein_coding	0.449141	4.42419	3.15509	0.00279609	0.0824725
Qrich1	9	108516806	108560164	+	Qrich1	protein_coding	0.222936	6.71082	3.15386	0.00280584	0.0826163
Prkg2	5	98929773	99037352	-	Prkg2	protein_coding	-0.307792	3.90555	-3.15193	0.00282112	0.0826941
Srsf4	4	131873617	131901707	+	Srsf4	protein_coding	0.316617	5.86666	3.15098	0.00282868	0.0826941
Rprd1b	2	158028497	158132298	+	Rprd1b	protein_coding	0.288285	5.21224	3.14984	0.00283778	0.0826941
Ptpn14	1	189728268	189876696	+	Ptpn14	protein_coding	0.72687	3.01401	3.14896	0.00284485	0.0826941
Pmfbp1	8	109494027	109542641	+	Pmfbp1	protein_coding	-0.31034	0.547009	-3.14894	0.00284504	0.0826941
Pianp	6	124996694	125003097	+	Pianp	protein_coding	0.576083	7.39362	3.14891	0.00284526	0.0826941
Rap1gap	4	137664726	137729862	+	Rap1gap	protein_coding	0.50933	7.21967	3.14809	0.00285187	0.0826941
Zfp362	4	128773088	128806046	-	Zfp362	protein_coding	0.497662	4.6068	3.14727	0.00285848	0.0826941
Med23	10	24869986	24913682	+	Med23	protein_coding	0.348911	4.88121	3.14669	0.00286316	0.0826941
Usp48	4	137593755	137658538	+	Usp48	protein_coding	0.424884	6.14999	3.1462	0.00286711	0.0826941
Gng12	6	66896397	67021351	+	Gng12	protein_coding	-0.231503	6.72954	-3.14501	0.00287671	0.0826941
C77080	4	129219578	129261405	-	C77080	protein_coding	0.485874	4.55892	3.14454	0.0028805	0.0826941
Pcdhb18	18	37489465	37494506	+	Pcdhb18	protein_coding	0.540396	3.24521	3.14452	0.00288067	0.0826941
Cnih4	1	181144693	181168995	+	Cnih4	protein_coding	-0.245161	5.41368	-3.14282	0.00289451	0.0826941
Vsx2	12	84569762	84595458	+	Vsx2	protein_coding	0.263518	0.402765	3.1426	0.00289631	0.0826941
Chrm4	2	91927249	91928689	+	Chrm4	protein_coding	0.416284	5.56092	3.14209	0.00290045	0.0826941
Usmg5	19	47083471	47090626	-	Usmg5	protein_coding	-0.471689	3.61239	-3.14188	0.00290218	0.0826941
Zrsr1	11	22972005	22976497	+	Zrsr1	protein_coding	0.166442	6.77703	3.14164	0.00290415	0.0826941
Haus2	2	120609383	120621561	+	Haus2	protein_coding	-0.288927	5.24786	-3.14145	0.00290569	0.0826941
Rnf11	4	109451098	109484729	-	Rnf11	protein_coding	-0.318961	8.2804	-3.14088	0.00291037	0.0826941
Echdc1	10	29313166	29347470	+	Echdc1	protein_coding	-0.741694	4.17637	-3.14082	0.00291087	0.0826941
Azin1	15	38487427	38519267	-	Azin1	protein_coding	-0.328032	7.48571	-3.1396	0.00292087	0.0828393
Megf8	7	25317164	25365918	+	Megf8	protein_coding	0.449482	7.22141	3.13733	0.00293956	0.0832304
Srcap	7	127511983	127561220	+	Srcap	protein_coding	0.591285	6.7872	3.13653	0.00294626	0.083281
Kmt2b	7	30568858	30588727	-	Kmt2b	protein_coding	0.675247	5.22764	3.1349	0.00295977	0.0833862
Rbm19	5	120116465	120198982	+	Rbm19	protein_coding	0.360031	3.54512	3.13458	0.00296241	0.0833862
Kpna2	11	106988629	106999542	-	Kpna2	protein_coding	-0.356195	3.24018	-3.1343	0.00296473	0.0833862
Kif5a	10	127225696	127263349	-	Kif5a	protein_coding	-0.249074	11.9673	-3.13235	0.00298103	0.0837057
Kmt2d	15	98831669	98871205	-	Kmt2d	protein_coding	0.670207	6.15505	3.13132	0.00298967	0.0837342
BC024139	15	76119517	76126597	-	BC024139	protein_coding	0.480988	1.05521	3.13106	0.00299192	0.0837342
Lhx6	2	36081953	36105409	-	Lhx6	protein_coding	0.418521	4.61728	3.13042	0.00299727	0.0837459
Ptpn23	9	110385082	110408214	-	Ptpn23	protein_coding	0.586825	5.59046	3.12814	0.00301654	0.0837987
Mark2	19	7275396	7341861	-	Mark2	protein_coding	0.361427	6.6772	3.12768	0.00302048	0.0837987
Pnpla8	12	44221370	44322533	+	Pnpla8	protein_coding	-0.35218	7.09713	-3.12744	0.00302248	0.0837987
Dusp7	9	106368632	106375725	+	Dusp7	protein_coding	0.326279	6.47275	3.12634	0.00303188	0.0837987
4833420G17Rik	13	119462768	119486121	+	4833420G17Rik	protein_coding	0.356656	4.6891	3.12608	0.00303406	0.0837987
Polr1a	6	71909053	71984936	+	Polr1a	protein_coding	0.378259	4.97621	3.1258	0.00303648	0.0837987
Slamf8	1	172581758	172590569	-	Slamf8	protein_coding	0.208959	0.42466	3.12504	0.00304292	0.0837987
Taf15	11	83473086	83506744	+	Taf15	protein_coding	0.336062	5.08493	3.12498	0.00304347	0.0837987
Kcnk10	12	98429437	98578311	-	Kcnk10	protein_coding	0.406776	3.40262	3.12496	0.00304363	0.0837987
Bcl9	3	97203662	97297918	-	Bcl9	protein_coding	0.50266	5.85659	3.12331	0.00305773	0.0840494
Pnkd	1	74284930	74353695	+	Pnkd	protein_coding	0.324185	7.54153	3.12274	0.00306265	0.0840494
Clec14a	12	58264720	58269291	-	Clec14a	protein_coding	-0.538671	2.67423	-3.12172	0.00307144	0.0841544
Fam222b	11	78094660	78156701	+	Fam222b	protein_coding	0.388293	5.27605	3.12048	0.00308216	0.084312
Slc3a1	17	85028347	85064244	+	Slc3a1	protein_coding	0.221575	0.242656	3.11874	0.00309719	0.0845867
Entpd4	14	69337174	69367271	+	Entpd4	protein_coding	0.370793	6.03734	3.11706	0.00311186	0.0848044
Celsr2	3	108390851	108415553	-	Celsr2	protein_coding	0.634314	7.49628	3.11668	0.00311516	0.0848044
Wfdc18	11	83709015	83711349	+	Wfdc18	protein_coding	-0.4136	0.986555	-3.11504	0.00312957	0.0849535
Il11ra2	4	42656355	42661894	-	Il11ra2	protein_coding	-0.349812	1.93811	-3.11491	0.00313066	0.0849535
Pan3	5	147430161	147548503	+	Pan3	protein_coding	0.258733	5.20222	3.10905	0.00318252	0.086223
Sorbs1	19	40294753	40513780	-	Sorbs1	protein_coding	0.292204	6.34426	3.10835	0.00318875	0.0862538
Rsrp1	4	134923592	134927672	+	Rsrp1	protein_coding	0.407979	7.15021	3.10757	0.00319575	0.0863056
Wdr95	5	149528679	149611895	+	Wdr95	protein_coding	0.181631	0.304222	3.1054	0.00321522	0.0865156
Krt9	11	100186781	100193247	-	Krt9	protein_coding	0.485127	3.54447	3.10501	0.0032187	0.0865156
Brd4	17	32196274	32284723	-	Brd4	protein_coding	0.457481	6.05596	3.10452	0.00322317	0.0865156
Acta2	19	34241090	34255337	-	Acta2	protein_coding	-0.505381	2.81948	-3.1036	0.00323148	0.0865156
Chrnb3	8	27368711	27399731	+	Chrnb3	protein_coding	0.745009	2.02024	3.10355	0.00323186	0.0865156
Slc12a5	2	164960802	164999732	+	Slc12a5	protein_coding	0.370041	8.9566	3.1033	0.00323413	0.0865156
Rps6ka1	4	133847290	133887798	-	Rps6ka1	protein_coding	0.374418	3.82426	3.10116	0.0032536	0.0867387
Csf2rb2	15	78282507	78305722	-	Csf2rb2	protein_coding	0.330065	1.02773	3.10113	0.00325384	0.0867387
Ambra1	2	91730134	91918850	+	Ambra1	protein_coding	0.273702	6.25876	3.10069	0.00325782	0.0867387
Pnma3	X	73064787	73068192	+	Pnma3	protein_coding	0.396316	4.73654	3.09869	0.00327616	0.0868241
Jade2	11	51813455	51857654	-	Jade2	protein_coding	0.430333	6.2954	3.0985	0.00327787	0.0868241
Fuca2	10	13499540	13519036	+	Fuca2	protein_coding	-0.228641	5.48122	-3.09842	0.0032786	0.0868241
Sptbn4	7	27356383	27447687	-	Sptbn4	protein_coding	0.536428	6.48001	3.0979	0.00328334	0.0868241
Nrip3	7	109758055	109782026	-	Nrip3	protein_coding	-0.228336	7.32086	-3.0967	0.00329439	0.0868241
Synpo	18	60593973	60660143	-	Synpo	protein_coding	0.437923	7.96614	3.09447	0.00331497	0.0868241
Iigp1	18	60376029	60392628	+	Iigp1	protein_coding	-0.573756	1.85441	-3.09446	0.00331507	0.0868241
Aldh1b1	4	45799022	45804605	+	Aldh1b1	protein_coding	0.367909	3.66144	3.09406	0.00331876	0.0868241
Ccdc177	12	80754043	80760688	-	Ccdc177	protein_coding	0.414053	4.1156	3.094	0.00331932	0.0868241
Oat	7	132557478	132576399	-	Oat	protein_coding	-0.203168	6.51262	-3.09379	0.00332134	0.0868241
Cipc	12	86947043	86965363	+	Cipc	protein_coding	0.188105	6.79269	3.0937	0.00332214	0.0868241
Ube2o	11	116537740	116581448	-	Ube2o	protein_coding	0.353909	7.1038	3.09367	0.00332246	0.0868241
Scaf4	16	90225680	90284504	-	Scaf4	protein_coding	0.379348	4.68514	3.09208	0.00333723	0.087076
Srm	4	148591503	148594994	+	Srm	protein_coding	0.342367	5.29578	3.09088	0.00334839	0.0870801
Entpd3	9	120539818	120568328	+	Entpd3	protein_coding	0.419414	3.99654	3.09083	0.00334884	0.0870801
Tmed5	5	108106366	108132621	-	Tmed5	protein_coding	-0.389195	5.53371	-3.09021	0.00335471	0.0870801
Phactr2	10	13207717	13474413	-	Phactr2	protein_coding	0.540415	4.83854	3.08982	0.00335828	0.0870801
Wnt8b	19	44493472	44514274	+	Wnt8b	protein_coding	0.397911	0.534584	3.08881	0.00336783	0.0870801
Cog7	7	121879363	121981712	-	Cog7	protein_coding	0.230638	5.5577	3.08877	0.00336819	0.0870801
Dstn	2	143915320	143943325	+	Dstn	protein_coding	-0.268156	7.6205	-3.08719	0.00338306	0.0873314
Atxn2l	7	126491708	126503438	-	Atxn2l	protein_coding	0.630804	6.21778	3.086	0.00339436	0.0874764
Gtpbp1	15	79690845	79721480	+	Gtpbp1	protein_coding	0.306267	6.01088	3.08551	0.003399	0.0874764
Coq9	8	94838321	94854896	+	Coq9	protein_coding	-0.259006	6.01229	-3.08427	0.0034107	0.087616
Zfp316	5	143249697	143270023	-	Zfp316	protein_coding	0.344681	4.99091	3.08385	0.00341475	0.087616
Safb	17	56584825	56606295	+	Safb	protein_coding	0.346971	5.74674	3.08323	0.00342064	0.0876346
Plekha1	7	130865756	130913313	+	Plekha1	protein_coding	0.23334	6.70758	3.08245	0.00342808	0.0876557
Fasn	11	120805846	120824548	-	Fasn	protein_coding	0.362493	7.79633	3.08206	0.0034318	0.0876557
Xpc	6	91489305	91515889	-	Xpc	protein_coding	0.308456	4.37867	3.081	0.00344198	0.0877835
Shmt2	10	127517123	127522445	-	Shmt2	protein_coding	0.266499	4.1331	3.07784	0.00347244	0.088319
Meis3	7	16175090	16186505	+	Meis3	protein_coding	0.40528	4.39174	3.07759	0.00347484	0.088319
Cnnm3	1	36511867	36528238	+	Cnnm3	protein_coding	0.395307	4.9301	3.07712	0.00347942	0.088319
Atp1a3	7	24978167	25005959	-	Atp1a3	protein_coding	0.435202	10.2672	3.07667	0.00348381	0.088319
Icam2	11	106377656	106388076	-	Icam2	protein_coding	-0.457393	1.378	-3.07484	0.00350159	0.0886371
Cadm3	1	173333258	173367696	-	Cadm3	protein_coding	0.283803	8.96946	3.07419	0.00350788	0.0886527
Gm10640	7	31155668	31170642	+	Gm10640	antisense	-0.268583	0.277205	-3.07354	0.00351423	0.0886527
Ifrd1	12	40201567	40248505	-	Ifrd1	protein_coding	-0.315771	4.89808	-3.07294	0.00352011	0.0886527
Pglyrp1	7	18871331	18890460	+	Pglyrp1	protein_coding	-0.350831	1.41708	-3.0724	0.00352547	0.0886527
Polr2m	9	71478437	71485936	-	Polr2m	protein_coding	-0.199126	7.97205	-3.07211	0.00352834	0.0886527
Syt3	7	44384102	44400188	+	Syt3	protein_coding	0.413303	5.60534	3.07039	0.00354523	0.0889455
Sgk1	10	21882184	21999904	+	Sgk1	protein_coding	0.595209	6.35826	3.06752	0.00357366	0.0895263
Sfxn5	6	85213049	85333423	-	Sfxn5	protein_coding	-0.202602	7.5948	-3.06625	0.00358633	0.089685
Ngb	12	87097531	87102540	-	Ngb	protein_coding	-0.762269	2.36592	-3.06582	0.00359057	0.089685
Dsel	1	111858702	111864919	-	Dsel	protein_coding	-0.483678	4.69882	-3.06313	0.00361756	0.0900512
Pcdhb21	18	37513621	37518326	+	Pcdhb21	protein_coding	0.534522	1.96711	3.06289	0.00361999	0.0900512
Tmem265	7	127561390	127566941	+	Tmem265	protein_coding	0.407379	1.80871	3.06274	0.00362146	0.0900512
Lpcat4	2	112239468	112247112	+	Lpcat4	protein_coding	0.479525	5.89616	3.06224	0.00362647	0.0900512
Cry2	2	92403646	92434044	-	Cry2	protein_coding	0.306083	7.42929	3.06049	0.00364412	0.0903572
Tmem41a	16	21934326	21947553	-	Tmem41a	protein_coding	0.246266	4.21525	3.0599	0.00365017	0.0903663
Ptges	2	30889471	30929864	-	Ptges	protein_coding	-0.369502	2.68375	-3.05941	0.00365515	0.0903663
Cep164	9	45766946	45828692	-	Cep164	protein_coding	0.507931	3.59424	3.05782	0.00367124	0.0905684
Camk1g	1	193346346	193370299	-	Camk1g	protein_coding	0.501904	5.14314	3.05588	0.00369107	0.0905684
Golga2	2	32287384	32307922	+	Golga2	protein_coding	0.343599	6.37839	3.0558	0.00369192	0.0905684
Fbxo42	4	141147913	141204063	+	Fbxo42	protein_coding	0.415052	5.59365	3.05546	0.00369542	0.0905684
Rab9	X	166457253	166479868	-	Rab9	protein_coding	-0.309711	5.46838	-3.05493	0.00370082	0.0905684
Idi1	13	8885501	8892452	+	Idi1	protein_coding	-0.374385	5.28948	-3.0544	0.0037063	0.0905684
Aars2	17	45506841	45520844	+	Aars2	protein_coding	0.351214	4.42142	3.05384	0.00371211	0.0905684
Maneal	4	124855239	124862172	-	Maneal	protein_coding	0.203899	6.38913	3.05337	0.0037169	0.0905684
Ubap2l	3	90000140	90052629	-	Ubap2l	protein_coding	0.322215	6.49799	3.05312	0.00371949	0.0905684
Btbd16	7	130774069	130825900	+	Btbd16	protein_coding	0.485331	0.792474	3.0529	0.00372178	0.0905684
Eif3j2	18	43475418	43477797	-	Eif3j2	protein_coding	-0.288757	5.35188	-3.05287	0.00372206	0.0905684
Sema4f	6	82911885	82939770	-	Sema4f	protein_coding	0.434749	5.68327	3.05229	0.00372807	0.0905847
Prex2	1	10993465	11303682	+	Prex2	protein_coding	-0.389532	6.36523	-3.05172	0.00373398	0.0905985
Ttll6	11	96133786	96165452	+	Ttll6	protein_coding	0.300639	0.448824	3.05105	0.00374086	0.0906357
Vstm4	14	32856756	32939492	+	Vstm4	protein_coding	-0.442519	2.1622	-3.04984	0.0037535	0.0907078
Ints1	5	139751282	139775675	-	Ints1	protein_coding	0.436661	5.36552	3.0493	0.00375913	0.0907078
Nefm	14	68082590	68124847	-	Nefm	protein_coding	0.367703	8.24076	3.04923	0.00375988	0.0907078
Rpap1	2	119763304	119787538	-	Rpap1	protein_coding	0.442759	4.22808	3.04834	0.00376915	0.0908021
Men1	19	6334979	6340892	+	Men1	protein_coding	0.344152	5.628	3.04485	0.00380575	0.0908298
Olfm5	7	104153013	104164832	-	Olfm5	protein_coding	-0.249052	0.195474	-3.04467	0.00380761	0.0908298
Slc9a8	2	167421712	167477001	+	Slc9a8	protein_coding	0.431855	5.02187	3.04459	0.00380851	0.0908298
Camk2n1	4	138454314	138460124	+	Camk2n1	protein_coding	-0.414606	11.7307	-3.04452	0.00380924	0.0908298
Ppp2r5d	17	46682991	46705112	-	Ppp2r5d	protein_coding	0.23355	6.65428	3.04381	0.00381678	0.0908298
Coro7	16	4626133	4679778	-	Coro7	protein_coding	0.387788	5.40029	3.04368	0.00381807	0.0908298
Tmem94	11	115765433	115799367	+	Tmem94	protein_coding	0.470112	5.63062	3.04299	0.00382545	0.0908298
Ctla2b	13	60895350	60897448	-	Ctla2b	protein_coding	-0.547053	1.07049	-3.04286	0.00382678	0.0908298
Zfp146	7	30161269	30169751	-	Zfp146	protein_coding	0.232157	5.62586	3.04275	0.00382793	0.0908298
Mgat5b	11	116918863	116986949	+	Mgat5b	protein_coding	0.564174	6.40286	3.0425	0.00383066	0.0908298
Vbp1	X	75514299	75534943	+	Vbp1	protein_coding	-0.337213	5.8623	-3.04246	0.00383102	0.0908298
Atp6ap2	X	12587801	12617050	+	Atp6ap2	protein_coding	-0.303508	8.15193	-3.04213	0.00383456	0.0908298
Rnase4	14	51091077	51106152	+	Rnase4	protein_coding	-0.493458	4.51251	-3.03956	0.00386195	0.0912187
Rab11a	9	64715299	64737759	-	Rab11a	protein_coding	-0.293271	7.08917	-3.0395	0.0038626	0.0912187
Tead3	17	28331671	28350818	-	Tead3	protein_coding	0.379398	1.16943	3.03786	0.00388017	0.0912187
Tmem254a	14	25923300	25927673	-	Tmem254a	protein_coding	-0.371221	3.60994	-3.03745	0.00388459	0.0912187
Reep5	18	34344889	34373416	-	Reep5	protein_coding	-0.175087	9.27056	-3.03678	0.00389179	0.0912187
Smyd2	1	189880492	189922364	-	Smyd2	protein_coding	-0.271357	5.44142	-3.03645	0.00389533	0.0912187
Kat2a	11	100704746	100712466	-	Kat2a	protein_coding	0.316043	5.9046	3.03641	0.00389576	0.0912187
Birc7	2	180929023	180934011	+	Birc7	protein_coding	-0.177991	0.203203	-3.03566	0.0039038	0.0912187
Bc1	7	144914470	144914638	+	Bc1	lincRNA	-1.13121	10.0304	-3.03556	0.00390486	0.0912187
A230001M10Rik	3	102262405	102445133	+	A230001M10Rik	lincRNA	-0.457831	2.41554	-3.03506	0.00391032	0.0912187
AI854703	6	48626764	48633690	+	AI854703	protein_coding	0.263659	5.28689	3.03497	0.00391131	0.0912187
Polr2a	11	69733997	69758638	-	Polr2a	protein_coding	0.576986	6.45349	3.03417	0.00391996	0.0912187
Mapk8ip3	17	24892153	24936978	-	Mapk8ip3	protein_coding	0.366844	8.13499	3.03387	0.0039232	0.0912187
Wasf1	10	40883475	40938571	+	Wasf1	protein_coding	0.204521	7.97471	3.03356	0.00392661	0.0912187
BC039966	4	153947633	153950504	-	BC039966	antisense	-0.288294	0.38894	-3.03261	0.00393685	0.0912187
Zscan20	4	128583539	128610099	-	Zscan20	protein_coding	0.53887	3.1095	3.03229	0.0039404	0.0912187
Plag1	4	3900996	3938424	-	Plag1	protein_coding	0.509443	2.41607	3.0321	0.00394241	0.0912187
Tmem183a	1	134346097	134361980	-	Tmem183a	protein_coding	-0.268975	6.20003	-3.03075	0.00395719	0.0913674
Dpp10	1	123321471	124045560	-	Dpp10	protein_coding	-0.271314	7.57185	-3.02841	0.00398281	0.0913674
Pax6	2	105668900	105697365	+	Pax6	protein_coding	-0.310794	3.25764	-3.02839	0.00398303	0.0913674
Fundc1	X	17556564	17572326	-	Fundc1	protein_coding	-0.360517	5.81715	-3.02791	0.0039883	0.0913674
Tatdn3	1	191045826	191062933	-	Tatdn3	protein_coding	0.4638	2.96889	3.02766	0.00399106	0.0913674
Pan2	10	128303335	128321359	+	Pan2	protein_coding	0.506859	4.28156	3.02762	0.00399155	0.0913674
Tm9sf2	14	122107038	122159605	+	Tm9sf2	protein_coding	-0.281577	7.00899	-3.0276	0.00399179	0.0913674
Nfkbid	7	30421732	30428747	+	Nfkbid	protein_coding	0.424003	1.52235	3.02718	0.00399641	0.0913674
Ubox5	2	130590002	130630039	-	Ubox5	protein_coding	0.226622	4.70679	3.02647	0.00400428	0.0913674
Cpne3	4	19519254	19570109	-	Cpne3	protein_coding	-0.363025	4.36824	-3.02591	0.00401046	0.0913674
Tlcd1	11	78176711	78181910	+	Tlcd1	protein_coding	-0.322439	4.42935	-3.02555	0.00401443	0.0913674
Cers1	8	70315775	70331593	+	Cers1	protein_coding	0.6606	4.96272	3.02533	0.00401687	0.0913674
Oas1a	5	120896256	120907522	-	Oas1a	protein_coding	-0.258278	0.513585	-3.02469	0.00402401	0.0913674
Olfr287	15	98206971	98221057	-	Olfr287	protein_coding	-0.354069	2.70321	-3.02466	0.00402426	0.0913674
Kcnj16	11	110968033	111027969	+	Kcnj16	protein_coding	-0.378128	5.33069	-3.02104	0.0040647	0.092107
Kcnc3	7	44590664	44604755	+	Kcnc3	protein_coding	0.68699	6.80612	3.01996	0.00407682	0.092107
Gm20300	10	30603195	30606635	-	Gm20300	lincRNA	-0.328703	6.32682	-3.01982	0.00407838	0.092107
AU040320	4	126753544	126870071	+	AU040320	protein_coding	0.295	6.0877	3.01981	0.00407856	0.092107
Arl6	16	59612949	59639392	-	Arl6	protein_coding	-0.281569	4.47651	-3.01926	0.00408472	0.0921235
Zfp706	15	36997027	37007774	-	Zfp706	protein_coding	-0.226613	7.92426	-3.01826	0.00409598	0.0921997
Ihh	1	74945315	74951673	-	Ihh	protein_coding	0.246939	0.351701	3.01774	0.00410189	0.0921997
Cd276	9	58524298	58555438	-	Cd276	protein_coding	0.444126	3.97698	3.0168	0.0041125	0.0921997
Nrsn2	2	152368755	152376639	-	Nrsn2	protein_coding	0.528697	6.59286	3.01603	0.00412124	0.0921997
Acss2	2	155517948	155585725	+	Acss2	protein_coding	-0.258611	5.83036	-3.01603	0.00412125	0.0921997
Mipol1	12	57230427	57497200	+	Mipol1	protein_coding	-0.391964	1.60645	-3.01603	0.00412129	0.0921997
Ranbp10	8	105768308	105827351	-	Ranbp10	protein_coding	0.314752	5.58413	3.01525	0.00413016	0.0921997
Zfr	15	12117831	12185684	+	Zfr	protein_coding	-0.253386	8.79254	-3.01512	0.00413159	0.0921997
Eif3j1	2	122028546	122056599	+	Eif3j1	protein_coding	-0.288473	5.37975	-3.01335	0.00415179	0.0925287
Zfp512b	2	181582103	181592804	-	Zfp512b	protein_coding	0.408667	6.20845	3.01079	0.00418117	0.0929587
Gigyf1	5	137518548	137527936	+	Gigyf1	protein_coding	0.635582	5.36051	3.01072	0.00418205	0.0929587
Pmpcb	5	21737141	21757153	+	Pmpcb	protein_coding	-0.302313	5.22307	-3.00991	0.00419132	0.093043
Pelp1	11	70392883	70410032	-	Pelp1	protein_coding	0.296632	5.04676	3.00923	0.00419917	0.0930954
Stim1	7	102267806	102437320	+	Stim1	protein_coding	0.266243	6.44169	3.0072	0.00422277	0.0933937
Rgl2	17	33929543	33937688	+	Rgl2	protein_coding	0.479306	4.64905	3.00712	0.00422364	0.0933937
Csgalnact2	6	118107452	118139141	-	Csgalnact2	protein_coding	-0.442052	4.36568	-3.00598	0.00423688	0.0935645
Zfhx2	14	55060262	55092325	-	Zfhx2	protein_coding	0.690645	5.78385	3.00492	0.00424935	0.0937178
Mef2d	3	88142372	88172087	+	Mef2d	protein_coding	0.426989	8.05748	3.00392	0.00426102	0.0938531
Colgalt2	1	152399830	152510696	+	Colgalt2	protein_coding	-0.491803	3.31345	-3.00275	0.00427471	0.0939303
Kirrel3	9	34485894	35036717	+	Kirrel3	protein_coding	0.30793	5.39143	3.00268	0.0042756	0.0939303
Inhbb	1	119415465	119422249	-	Inhbb	protein_coding	0.453606	3.06158	3.00088	0.00429679	0.0941772
Mapk8ip2	15	89453913	89464469	+	Mapk8ip2	protein_coding	0.259861	8.10814	2.99977	0.00430987	0.0941772
Oas1c	5	120800194	120812515	-	Oas1c	protein_coding	-0.541074	1.52693	-2.99971	0.00431064	0.0941772
Proser1	3	53463666	53481756	+	Proser1	protein_coding	0.403029	4.53514	2.99889	0.00432034	0.0941772
Prr12	7	45027563	45052882	-	Prr12	protein_coding	0.808849	5.46287	2.9987	0.00432267	0.0941772
Yes1	5	32611171	32687058	+	Yes1	protein_coding	-0.327262	4.00699	-2.99834	0.00432689	0.0941772
Adam11	11	102761439	102780263	+	Adam11	protein_coding	0.369901	6.78565	2.99815	0.00432913	0.0941772
Olfr316	11	58752734	58759672	+	Olfr316	protein_coding	-0.400015	1.0096	-2.99733	0.00433889	0.0941772
Nalcn	14	123276634	123627145	-	Nalcn	protein_coding	0.252125	6.80913	2.99709	0.00434183	0.0941772
Arel1	12	84918148	84970901	-	Arel1	protein_coding	0.238997	7.44431	2.99704	0.00434237	0.0941772
Rnf139	15	58889229	58907058	+	Rnf139	protein_coding	-0.271051	5.7663	-2.99641	0.00434989	0.0942198
Atg2a	19	6241668	6262336	+	Atg2a	protein_coding	0.4609	5.21043	2.99593	0.0043556	0.0942231
Cacna2d1	5	15934691	16374512	+	Cacna2d1	protein_coding	-0.329789	8.06991	-2.99497	0.00436709	0.0942502
Adar	3	89715022	89753447	+	Adar	protein_coding	0.377284	7.36697	2.99482	0.00436888	0.0942502
Haus5	7	30653711	30664995	-	Haus5	protein_coding	-0.337473	1.74293	-2.99424	0.00437593	0.0942502
Galnt6	15	100691813	100729377	-	Galnt6	protein_coding	0.348887	4.17765	2.99359	0.00438371	0.0942502
Ldb1	19	46032593	46045215	-	Ldb1	protein_coding	0.311624	5.92814	2.99351	0.00438463	0.0942502
Rab31	17	65651729	65772753	-	Rab31	protein_coding	-0.254701	6.81375	-2.99297	0.00439118	0.0942713
Syt11	3	88744700	88775165	-	Syt11	protein_coding	0.186143	10.2274	2.99222	0.00440028	0.0943139
Bahd1	2	118900377	118924529	+	Bahd1	protein_coding	0.38227	5.60923	2.99189	0.00440428	0.0943139
Pcdhb6	18	37333921	37337675	+	Pcdhb6	protein_coding	-0.540447	2.59415	-2.99112	0.00441354	0.0943931
Txnl1	18	63662801	63692360	-	Txnl1	protein_coding	-0.271606	6.04609	-2.9906	0.00441986	0.0944091
Gstz1	12	87147165	87164724	+	Gstz1	protein_coding	-0.30497	5.53346	-2.98975	0.00443022	0.0944902
Parp9	16	35938470	35972606	+	Parp9	protein_coding	-0.445384	2.23179	-2.98893	0.00444021	0.0944902
Chpt1	10	88452745	88504074	-	Chpt1	protein_coding	-0.356004	5.37965	-2.98876	0.00444227	0.0944902
Dagla	19	10245265	10304878	-	Dagla	protein_coding	0.571445	6.70149	2.98833	0.00444748	0.0944902
Rgs17	10	5825663	5922401	-	Rgs17	protein_coding	-0.304282	6.96587	-2.988	0.00445151	0.0944902
Tmem63b	17	45660171	45686906	-	Tmem63b	protein_coding	0.261491	6.57389	2.98642	0.00447088	0.0946505
Sall2	14	52311172	52328763	-	Sall2	protein_coding	0.303033	6.40847	2.98641	0.00447101	0.0946505
Stom	2	35313986	35336977	-	Stom	protein_coding	-0.344482	4.02846	-2.98569	0.00447978	0.0946505
Tmem200c	17	68826623	68843140	+	Tmem200c	protein_coding	0.429448	3.62168	2.98472	0.00449167	0.0946505
Lmtk3	7	45783738	45804145	+	Lmtk3	protein_coding	0.765858	6.44977	2.98452	0.0044942	0.0946505
Csgalnact1	8	68356781	68735147	-	Csgalnact1	protein_coding	-0.235769	4.984	-2.98406	0.00449979	0.0946505
Ccdc149	5	52374651	52471522	-	Ccdc149	protein_coding	0.281171	5.96125	2.98396	0.00450108	0.0946505
Efcab12	6	115810729	115838413	-	Efcab12	protein_coding	-0.519756	2.54986	-2.98375	0.00450371	0.0946505
Fut9	4	25609332	25800245	-	Fut9	protein_coding	-0.425799	7.73479	-2.98154	0.00453105	0.0948834
Ptprs	17	56412426	56476484	-	Ptprs	protein_coding	0.327446	8.14058	2.98128	0.00453428	0.0948834
Fam189b	3	89183143	89189296	+	Fam189b	protein_coding	0.428553	5.00577	2.98013	0.00454863	0.0948834
Nxt2	X	142226770	142239693	+	Nxt2	protein_coding	-0.337026	5.73074	-2.97981	0.00455257	0.0948834
St8sia4	1	95587682	95667572	-	St8sia4	protein_coding	-0.392323	4.49074	-2.97971	0.00455374	0.0948834
Foxk1	5	142401497	142462012	+	Foxk1	protein_coding	0.498564	6.1292	2.97928	0.00455915	0.0948834
Bco2	9	50533087	50555182	-	Bco2	protein_coding	-0.432881	2.36816	-2.97881	0.00456509	0.0948834
Pogz	3	94837567	94882327	+	Pogz	protein_coding	0.334406	6.20409	2.97864	0.00456717	0.0948834
Tm4sf1	3	57285611	57301989	-	Tm4sf1	protein_coding	-0.383408	3.38432	-2.97838	0.00457039	0.0948834
Ell	8	70539457	70592859	+	Ell	protein_coding	0.362498	4.36447	2.97835	0.00457074	0.0948834
Slc8a2	7	16129826	16161064	+	Slc8a2	protein_coding	0.364495	8.45363	2.97778	0.0045779	0.0949158
Piwil2	14	70372477	70429384	-	Piwil2	protein_coding	0.303124	0.942938	2.97688	0.00458927	0.0950354
Col17a1	19	47646344	47692095	-	Col17a1	protein_coding	-0.336841	0.683318	-2.97643	0.00459489	0.0950357
Tmem263	10	85102627	85120619	+	Tmem263	protein_coding	-0.289083	5.72562	-2.9755	0.00460656	0.0950614
Cyp26b1	6	84571414	84593909	-	Cyp26b1	protein_coding	0.69846	2.91535	2.97544	0.00460734	0.0950614
Coq2	5	100654723	100675141	-	Coq2	protein_coding	-0.267091	5.96748	-2.97438	0.00462079	0.0952231
Mettl14	3	123368297	123386109	-	Mettl14	protein_coding	0.19015	4.57144	2.9716	0.00465596	0.0957407
S100b	10	76253853	76261160	+	S100b	protein_coding	-0.325725	7.97382	-2.97109	0.0046625	0.0957407
Abca3	17	24351950	24410202	+	Abca3	protein_coding	0.41975	6.23725	2.97106	0.00466284	0.0957407
Pom121	5	135376141	135394547	-	Pom121	protein_coding	0.528806	6.22835	2.96985	0.00467837	0.0959433
Mogs	6	83115496	83118899	+	Mogs	protein_coding	0.298165	4.90425	2.96914	0.00468743	0.0959951
Tnrc18	5	142724661	142817663	-	Tnrc18	protein_coding	0.556211	5.99123	2.96835	0.00469759	0.0959951
Serpind1	16	17331371	17343576	+	Serpind1	protein_coding	-0.475069	2.05045	-2.96833	0.00469787	0.0959951
Apip	2	103073675	103092645	+	Apip	protein_coding	-0.314852	3.28954	-2.96698	0.00471518	0.0962271
Mllt11	3	95219135	95232172	-	Mllt11	protein_coding	-0.229001	8.96153	-2.96656	0.00472057	0.0962271
Tmem108	9	103482947	103761838	-	Tmem108	protein_coding	0.443447	4.14704	2.96487	0.00474239	0.0962701
Hmg20a	9	56418609	56496937	+	Hmg20a	protein_coding	0.242718	6.74006	2.96464	0.00474544	0.0962701
Ptn	6	36714929	36810221	-	Ptn	protein_coding	-0.287086	7.5024	-2.96461	0.00474584	0.0962701
Fev	1	74881509	74885420	-	Fev	protein_coding	0.15727	0.0898587	2.96421	0.00475102	0.0962701
Wdr81	11	75440944	75454718	-	Wdr81	protein_coding	0.466244	4.70511	2.96403	0.00475339	0.0962701
Lgi4	7	31059342	31070936	+	Lgi4	protein_coding	-0.363896	5.38787	-2.96333	0.00476241	0.0962701
Dhx38	8	109548011	109565862	-	Dhx38	protein_coding	0.33123	4.9023	2.96333	0.00476242	0.0962701
Tmem33	5	67260565	67291462	+	Tmem33	protein_coding	-0.327664	6.97386	-2.9611	0.00479155	0.0967203
Spcs3	8	54520433	54529999	-	Spcs3	protein_coding	-0.229427	7.27023	-2.96075	0.0047961	0.0967203
Mppe1	18	67225530	67245831	-	Mppe1	protein_coding	0.365002	3.13995	2.95929	0.00481519	0.0967557
Proser3	7	30539134	30552300	-	Proser3	protein_coding	0.44652	1.67086	2.959	0.0048191	0.0967557
Atg3	16	45158785	45188539	+	Atg3	protein_coding	-0.275069	4.82801	-2.95896	0.00481963	0.0967557
Dnmbp	19	43846821	43940192	-	Dnmbp	protein_coding	0.535663	3.87675	2.95888	0.00482067	0.0967557
Ptk7	17	46564471	46629505	-	Ptk7	protein_coding	0.355224	3.4082	2.95812	0.00483071	0.0968427
Disp2	2	118779719	118811294	+	Disp2	protein_coding	0.424037	8.56131	2.95743	0.0048397	0.0969083
Ptpn22	3	103859795	103912248	+	Ptpn22	protein_coding	0.27391	0.707566	2.95598	0.00485893	0.097172
Paf1	7	28392951	28399389	+	Paf1	protein_coding	0.251519	5.15222	2.95524	0.00486874	0.097172
Ank3	10	69398773	70027439	+	Ank3	protein_coding	0.243846	8.06518	2.95514	0.00487006	0.097172
Phactr4	4	132355923	132422490	-	Phactr4	protein_coding	0.454471	3.77976	2.95452	0.00487827	0.0972214
Gaa	11	119267887	119285455	+	Gaa	protein_coding	0.46807	7.51225	2.95378	0.00488814	0.0973038
Kdm4b	17	56326062	56402871	+	Kdm4b	protein_coding	0.394614	5.64252	2.95329	0.00489468	0.0973198
4930524B15Rik	11	31965592	31979652	+	4930524B15Rik	protein_coding	0.218024	0.211411	2.95089	0.00492685	0.0978448
Defb1	8	21776599	21795186	+	Defb1	protein_coding	-0.51818	1.0395	-2.95	0.00493875	0.0979575
Wdr11	7	129591863	129635739	+	Wdr11	protein_coding	0.219209	5.42868	2.94961	0.00494408	0.0979575
Tcof1	18	60813755	60848972	-	Tcof1	protein_coding	0.453548	4.50029	2.94794	0.00496659	0.0979919
Arhgef17	7	100869752	100932108	-	Arhgef17	protein_coding	0.335735	7.83631	2.9479	0.0049671	0.0979919
Serpinb1a	13	32842092	32851186	-	Serpinb1a	protein_coding	-0.413128	3.83672	-2.94787	0.00496749	0.0979919
Scamp3	3	89177473	89182766	+	Scamp3	protein_coding	0.368785	4.98408	2.94765	0.00497049	0.0979919
Prkcg	7	3289179	3331100	+	Prkcg	protein_coding	0.548041	8.23001	2.94731	0.00497513	0.0979919
Brinp2	1	158245269	158356327	-	Brinp2	protein_coding	0.219834	7.10974	2.94633	0.00498842	0.0979919
Crot	5	8966033	8997325	-	Crot	protein_coding	-0.350735	5.10299	-2.94556	0.00499887	0.0979919
Kif4	X	100625737	100727215	+	Kif4	protein_coding	-0.520816	1.53504	-2.94553	0.00499929	0.0979919
Olfml1	7	107567446	107591095	+	Olfml1	protein_coding	-0.38156	4.22577	-2.94529	0.00500253	0.0979919
Bpnt1	1	185332149	185357778	+	Bpnt1	protein_coding	-0.264927	6.00967	-2.94521	0.0050036	0.0979919
Oacyl	18	65698268	65751602	+	Oacyl	protein_coding	0.407249	1.38113	2.94174	0.00505115	0.0988091
Pla2g16	19	7557459	7588546	+	Pla2g16	protein_coding	-0.27632	5.882	-2.94064	0.00506626	0.0989476
Gm12992	4	131899478	131920030	-	Gm12992	processed_transcript	0.429952	3.52804	2.94037	0.0050699	0.0989476
Chst1	2	92599707	92615251	+	Chst1	protein_coding	0.250781	8.45795	2.93972	0.00507898	0.0990109
Hif3a	7	17031507	17062428	-	Hif3a	protein_coding	0.820283	2.99816	2.93921	0.00508602	0.0990344
Lmntd1	6	145365134	145614320	-	Lmntd1	protein_coding	-0.312552	0.318708	-2.93773	0.00510651	0.0992363
Il20rb	9	100457719	100486789	-	Il20rb	protein_coding	0.237103	0.492029	2.93755	0.00510892	0.0992363
Nisch	14	31170930	31216947	-	Nisch	protein_coding	0.34499	8.31144	2.9369	0.00511801	0.0992363
Fam205c	4	42868004	42874235	-	Fam205c	protein_coding	0.667935	2.66825	2.93669	0.00512097	0.0992363
Pcdh12	18	38267092	38284403	-	Pcdh12	protein_coding	-0.266645	0.445592	-2.93468	0.00514894	0.0992363
Crmp1	5	37241940	37292134	+	Crmp1	protein_coding	0.27823	7.41913	2.93449	0.00515157	0.0992363
C1qb	4	136880129	136886188	-	C1qb	protein_coding	-0.487561	6.54137	-2.93316	0.00517034	0.0992363
Hunk	16	90386013	90499554	+	Hunk	protein_coding	0.414078	4.88496	2.93298	0.00517275	0.0992363
BC017158	7	128271379	128298171	-	BC017158	protein_coding	0.421664	4.44231	2.93209	0.00518534	0.0992363
Slitrk5	14	111675097	111683142	+	Slitrk5	protein_coding	0.197819	6.77171	2.93186	0.00518852	0.0992363
Pik3r6	11	68503019	68552699	+	Pik3r6	protein_coding	-0.412856	2.23623	-2.93173	0.00519036	0.0992363
Nhsl1	10	18318985	18533893	+	Nhsl1	protein_coding	-0.335539	5.08053	-2.93046	0.00520837	0.0992363
Ucma	2	4976122	4985749	+	Ucma	protein_coding	-0.350468	0.599327	-2.92993	0.0052158	0.0992363
Lzts3	2	130632839	130642804	-	Lzts3	protein_coding	0.368604	8.37097	2.92955	0.00522118	0.0992363
Nedd8	14	55662263	55672125	-	Nedd8	protein_coding	-0.318809	6.3158	-2.92931	0.00522463	0.0992363
Slc15a2	16	36750177	36784963	-	Slc15a2	protein_coding	-0.323566	4.61712	-2.92827	0.0052394	0.0992363
St8sia1	6	142821545	142964453	-	St8sia1	protein_coding	0.377854	6.27498	2.92804	0.00524264	0.0992363
Fdxacb1	9	50768236	50773349	+	Fdxacb1	protein_coding	-0.450556	2.79336	-2.92775	0.00524684	0.0992363
C030029H02Rik	7	136268324	136318514	+	C030029H02Rik	lincRNA	-0.46228	2.85685	-2.92714	0.00525544	0.0992363
Lrsam1	2	32925216	32961615	-	Lrsam1	protein_coding	0.286351	5.00524	2.92541	0.00528025	0.0992363
Sars2	7	28741992	28753872	+	Sars2	protein_coding	0.43894	2.96247	2.9254	0.00528026	0.0992363
Nlgn2	11	69823122	69837785	-	Nlgn2	protein_coding	0.449875	7.8695	2.92528	0.00528209	0.0992363
Rpl31	1	39367842	39371912	+	Rpl31	protein_coding	-0.49567	4.48355	-2.92507	0.00528499	0.0992363
Trhr	15	44196135	44235913	+	Trhr	protein_coding	-0.522654	2.20421	-2.92496	0.00528657	0.0992363
Slc5a3	16	92058322	92087474	+	Slc5a3	protein_coding	-0.477881	5.33642	-2.9248	0.00528897	0.0992363
Opn1mw	X	74127464	74150761	+	Opn1mw	protein_coding	-0.23599	0.418581	-2.92466	0.00529093	0.0992363
Cggbp1	16	64851996	64859508	+	Cggbp1	protein_coding	-0.266497	6.54861	-2.92458	0.00529209	0.0992363
Eif5	12	111538016	111546753	+	Eif5	protein_coding	-0.249697	7.71629	-2.92448	0.00529359	0.0992363
Szt2	4	118362743	118409274	-	Szt2	protein_coding	0.677351	4.84873	2.92416	0.00529818	0.0992363
Nr1d1	11	98767932	98775334	-	Nr1d1	protein_coding	0.403018	7.37313	2.9236	0.00530619	0.0992363
Otud7b	3	96104527	96161130	+	Otud7b	protein_coding	0.307796	5.94201	2.92288	0.00531656	0.0992363
Rtl1	12	109589193	109600331	-	Rtl1	protein_coding	0.718789	2.27138	2.92214	0.00532726	0.0992363
Tagln3	16	45711230	45724609	-	Tagln3	protein_coding	-0.273089	8.29362	-2.92176	0.00533276	0.0992363
Serinc1	10	57515774	57532531	-	Serinc1	protein_coding	-0.302365	10.5876	-2.92144	0.00533738	0.0992363
Maoa	X	16619698	16687819	+	Maoa	protein_coding	-0.246853	5.22522	-2.92142	0.00533762	0.0992363
Pcdh7	5	57717967	58133231	+	Pcdh7	protein_coding	-0.445265	8.16096	-2.92139	0.00533802	0.0992363
Ezh1	11	101191115	101226464	-	Ezh1	protein_coding	0.197853	5.92836	2.92127	0.00533981	0.0992363
Pknox2	9	36890982	37147408	-	Pknox2	protein_coding	0.343465	6.2513	2.92117	0.00534127	0.0992363
Plekhh3	11	101162679	101171352	-	Plekhh3	protein_coding	0.520712	2.82646	2.92101	0.00534355	0.0992363
Etnppl	3	130617448	130637522	+	Etnppl	protein_coding	0.756906	4.84401	2.91986	0.00536018	0.0992363
Rasal1	5	120648812	120679598	+	Rasal1	protein_coding	0.425073	5.98485	2.91954	0.00536487	0.0992363
Zfp395	14	65358389	65398931	+	Zfp395	protein_coding	0.522698	3.55568	2.91944	0.00536634	0.0992363
Ctdspl	9	118926453	119043999	+	Ctdspl	protein_coding	0.354451	5.47397	2.91931	0.00536825	0.0992363
Dvl2	11	70000595	70012302	+	Dvl2	protein_coding	0.398047	3.61265	2.91929	0.00536854	0.0992363
Egr4	6	85511121	85513590	-	Egr4	protein_coding	0.681176	3.17146	2.91916	0.00537037	0.0992363
Flot2	11	78037931	78060435	+	Flot2	protein_coding	0.217977	6.98507	2.91776	0.00539084	0.0992363
Gripap1	X	7789765	7820568	+	Gripap1	protein_coding	0.251192	6.26256	2.91771	0.00539147	0.0992363
Spg7	8	123062942	123097761	+	Spg7	protein_coding	0.341223	5.17737	2.91756	0.00539375	0.0992363
Xrcc1	7	24546289	24573441	+	Xrcc1	protein_coding	0.34551	3.83523	2.91754	0.00539403	0.0992363
Eef1a2	2	181147653	181157015	-	Eef1a2	protein_coding	0.285827	9.81843	2.91749	0.00539471	0.0992363
L1cam	X	73853778	73896106	-	L1cam	protein_coding	0.426505	7.23918	2.91749	0.00539481	0.0992363
Leng8	7	4137039	4148178	+	Leng8	protein_coding	0.651044	7.2893	2.9165	0.00540915	0.099247
Cspg4	9	56865033	56899871	+	Cspg4	protein_coding	0.403579	4.19432	2.91614	0.00541446	0.099247
Prpf38b	3	108902805	108911728	-	Prpf38b	protein_coding	0.282735	5.91364	2.91591	0.00541783	0.099247
Abhd5	9	122351608	122381525	+	Abhd5	protein_coding	-0.45085	4.37353	-2.91585	0.00541879	0.099247
Sec23a	12	58958383	59012018	-	Sec23a	protein_coding	-0.231181	6.79436	-2.91496	0.00543189	0.0993796
Pitpnm2	5	124118690	124249761	-	Pitpnm2	protein_coding	0.529954	7.75907	2.91365	0.00545111	0.0995675
Marcksl1	4	129513581	129515986	+	Marcksl1	protein_coding	0.451976	5.53759	2.91346	0.0054539	0.0995675
Irf4	13	30749226	30766977	+	Irf4	protein_coding	0.431726	0.895182	2.91183	0.00547801	0.0996111
Wnk2	13	49036303	49148015	-	Wnk2	protein_coding	0.531812	6.30105	2.91179	0.00547867	0.0996111
Dnajc15	14	77820681	77875126	-	Dnajc15	protein_coding	-0.304138	4.76713	-2.91172	0.00547968	0.0996111
Akr1b10	6	34384218	34396951	+	Akr1b10	protein_coding	-0.311122	3.58235	-2.91171	0.00547979	0.0996111
Bard1	1	71027498	71103147	-	Bard1	protein_coding	0.290645	0.659718	2.90992	0.00550644	0.0996916
Pcdha1	18	36930184	37187662	+	Pcdha1	protein_coding	0.698514	2.39538	2.90956	0.00551171	0.0996916
Crocc	4	141016637	141060551	-	Crocc	protein_coding	0.637957	4.12373	2.90952	0.00551239	0.0996916
Igfn1	1	135953578	136006343	-	Igfn1	protein_coding	0.868058	4.8553	2.90801	0.00553485	0.0996916
Baz2a	10	128091577	128129304	+	Baz2a	protein_coding	0.381064	5.63462	2.9072	0.00554698	0.0996916
Zdhhc8	16	18220753	18235137	-	Zdhhc8	protein_coding	0.512432	6.71115	2.90718	0.00554738	0.0996916
Atad3aos	4	155761178	155769265	+	Atad3aos	antisense	-0.288445	0.776027	-2.90685	0.00555231	0.0996916
Pdk4	6	5483351	5496310	-	Pdk4	protein_coding	-0.342508	3.98307	-2.90668	0.00555491	0.0996916
Thnsl1	2	21205724	21215010	+	Thnsl1	protein_coding	-0.291614	4.62446	-2.90652	0.00555722	0.0996916
Commd8	5	72156575	72168190	-	Commd8	protein_coding	-0.315122	5.47228	-2.90646	0.00555816	0.0996916
Rrm2b	15	37923952	37961319	-	Rrm2b	protein_coding	-0.292532	5.86483	-2.90501	0.00557989	0.0996916
Spryd7	14	61531993	61556887	-	Spryd7	protein_coding	-0.3471	5.91948	-2.90435	0.00558998	0.0996916
Ptpru	4	131768457	131838289	-	Ptpru	protein_coding	0.399008	5.01649	2.90418	0.00559256	0.0996916
Mtpn	6	35508906	35539889	-	Mtpn	protein_coding	-0.300815	9.23244	-2.90411	0.00559349	0.0996916
Smg5	3	88336260	88362339	+	Smg5	protein_coding	0.302308	6.67185	2.90407	0.00559422	0.0996916
Plin2	4	86648386	86670061	-	Plin2	protein_coding	-0.467436	2.69044	-2.90397	0.00559567	0.0996916
Pprc1	19	46044886	46072916	+	Pprc1	protein_coding	0.432707	4.5471	2.90387	0.0055971	0.0996916
Inf2	12	112588784	112615558	+	Inf2	protein_coding	0.463116	7.23219	2.90374	0.00559911	0.0996916
Ogfrl1	1	23366424	23397773	-	Ogfrl1	protein_coding	-0.251312	7.91442	-2.90369	0.00559995	0.0996916
Cabin1	10	75646112	75764342	-	Cabin1	protein_coding	0.400565	6.48988	2.90357	0.00560178	0.0996916
Cyp27a1	1	74713574	74737893	+	Cyp27a1	protein_coding	-0.375009	2.61232	-2.90317	0.0056078	0.0996942
Vps18	2	119288740	119298454	+	Vps18	protein_coding	0.32767	5.86489	2.90208	0.0056243	0.0998697
Pmaip1	18	66458604	66465551	+	Pmaip1	protein_coding	0.675125	2.32488	2.90174	0.00562945	0.0998697
Catsperd	17	56628143	56664457	+	Catsperd	protein_coding	0.398227	0.682461	2.90061	0.00564664	0.10003
C2cd2l	9	44309237	44320286	-	C2cd2l	protein_coding	0.369608	7.12996	2.90037	0.00565027	0.10003
Gpr61	3	108148321	108154883	-	Gpr61	protein_coding	0.239021	4.519	2.89949	0.00566381	0.100165
Rnft2	5	118190736	118245117	-	Rnft2	protein_coding	0.292191	6.67981	2.89876	0.0056749	0.100257
Grm2	9	106643095	106656083	-	Grm2	protein_coding	0.567202	5.26158	2.89806	0.0056857	0.100343
Sf3b2	19	5273923	5295456	-	Sf3b2	protein_coding	0.126857	7.7164	2.89743	0.00569534	0.100373
Tma7	9	109074568	109082588	-	Tma7	protein_coding	-0.353702	4.93619	-2.89697	0.00570234	0.100373
Cxcl14	13	56288643	56296552	-	Cxcl14	protein_coding	-0.344687	6.87587	-2.89679	0.00570514	0.100373
Ppp1r3c	19	36731737	36736654	-	Ppp1r3c	protein_coding	-0.287897	6.15716	-2.89526	0.00572882	0.100685
Lypd6	2	50066429	50193570	+	Lypd6	protein_coding	-0.27948	5.33676	-2.89465	0.00573814	0.100708
Grik5	7	25009849	25072347	-	Grik5	protein_coding	0.44326	7.07675	2.8942	0.00574523	0.100708
Gm4285	14	75843379	75844965	-	Gm4285	antisense	-0.456068	2.00959	-2.89402	0.00574797	0.100708
Hoga1	19	42045610	42070954	+	Hoga1	protein_coding	-0.408623	0.93918	-2.89096	0.00579559	0.101322
Ncor2	5	125017153	125179220	-	Ncor2	protein_coding	0.583089	5.99611	2.89038	0.00580459	0.101322
Per2	1	91415982	91459325	-	Per2	protein_coding	0.429399	5.55125	2.89033	0.00580545	0.101322
Arl5a	2	52397951	52424902	-	Arl5a	protein_coding	-0.22591	7.09361	-2.89003	0.00581016	0.101322
Sycp3	10	88459569	88473237	+	Sycp3	protein_coding	-0.390168	1.4613	-2.88953	0.00581794	0.101322
Rai1	11	60105013	60199198	+	Rai1	protein_coding	0.533339	6.00776	2.88938	0.00582037	0.101322
Ndfip1	18	38418975	38464400	+	Ndfip1	protein_coding	-0.268127	7.39428	-2.88909	0.0058248	0.101322
Med24	11	98704591	98729436	-	Med24	protein_coding	0.357058	6.15429	2.88864	0.00583184	0.10134
B230307C23Rik	16	97997315	98031802	+	B230307C23Rik	protein_coding	-0.461447	2.05532	-2.88714	0.00585557	0.101506
Mucl2	15	103895855	103899313	-	Mucl2	protein_coding	0.176366	0.0975384	2.8865	0.00586557	0.101506
Abcg4	9	44273188	44288616	-	Abcg4	protein_coding	0.501146	5.77638	2.88617	0.0058708	0.101506
Pde11a	2	75989141	76338775	-	Pde11a	protein_coding	0.431574	1.10895	2.88605	0.00587275	0.101506
Dennd6b	15	89182213	89196497	-	Dennd6b	protein_coding	0.519663	5.39874	2.8856	0.00587981	0.101506
B3gnt5	16	19760208	19772754	+	B3gnt5	protein_coding	-0.460359	1.27008	-2.88543	0.00588258	0.101506
Fam160b2	14	70583296	70599836	-	Fam160b2	protein_coding	0.342982	5.71531	2.88538	0.00588328	0.101506
Emc3	6	113514874	113531653	-	Emc3	protein_coding	-0.211143	6.38004	-2.88458	0.00589594	0.101621
Cacybp	1	160202367	160212876	-	Cacybp	protein_coding	-0.334052	6.28665	-2.88198	0.00593736	0.102046
Tom1l2	11	60226714	60352906	-	Tom1l2	protein_coding	0.273501	8.307	2.88194	0.00593805	0.102046
Asna1	8	85017931	85025282	-	Asna1	protein_coding	-0.238117	6.74281	-2.8816	0.00594352	0.102046
Kctd4	14	75955009	75966207	+	Kctd4	protein_coding	-0.372632	5.17614	-2.88121	0.00594965	0.102046
Sc5d	9	42251595	42264257	-	Sc5d	protein_coding	-0.24988	6.10048	-2.88115	0.00595067	0.102046
Syn3	10	86055125	86498897	-	Syn3	protein_coding	0.415195	4.97855	2.88071	0.0059578	0.10206
Sec31a	5	100361649	100416235	-	Sec31a	protein_coding	0.385109	6.15754	2.88021	0.00596575	0.10206
Tst	15	78399556	78405908	-	Tst	protein_coding	-0.46602	4.96483	-2.87955	0.00597639	0.10206
Tmed8	12	87166237	87200455	-	Tmed8	protein_coding	0.298353	6.27366	2.87883	0.00598795	0.10206
Vars	17	35000987	35016323	+	Vars	protein_coding	0.404371	4.32955	2.87832	0.00599618	0.10206
Fam84a	12	14146830	14152055	-	Fam84a	protein_coding	0.186455	6.58483	2.8783	0.00599641	0.10206
Gm14391	2	175191065	175206918	-	Gm14391	protein_coding	-0.334816	3.08041	-2.87771	0.00600601	0.10206
Dusp8	7	142079490	142095844	-	Dusp8	protein_coding	0.304171	7.53362	2.87743	0.00601049	0.10206
Ndufb9	15	58933756	58939489	+	Ndufb9	protein_coding	-0.358027	7.21692	-2.87729	0.00601273	0.10206
Gal3st3	19	5298331	5308739	+	Gal3st3	protein_coding	0.384279	5.482	2.87703	0.00601693	0.10206
Grina	15	76246764	76249905	+	Grina	protein_coding	0.315488	8.63573	2.87692	0.00601874	0.10206
Purb	11	6467599	6475918	-	Purb	protein_coding	-0.256478	9.63168	-2.87627	0.00602924	0.10206
Pcnx3	19	5664635	5688909	-	Pcnx3	protein_coding	0.661429	4.99786	2.87624	0.00602971	0.10206
Coro2b	9	62419492	62537045	-	Coro2b	protein_coding	0.510514	7.77447	2.87568	0.00603877	0.102102
2200002D01Rik	7	29246561	29248467	-	2200002D01Rik	protein_coding	0.113966	0.0917078	2.87535	0.00604427	0.102102
Tdrd9	12	111971559	112068855	+	Tdrd9	protein_coding	0.23038	0.510565	2.87369	0.00607126	0.102242
Snrnp70	7	45376453	45395743	-	Snrnp70	protein_coding	0.527125	7.59509	2.87288	0.00608446	0.102242
Arrdc2	8	70835129	70839721	-	Arrdc2	protein_coding	0.502886	3.92462	2.87263	0.00608845	0.102242
Cyld	8	88697028	88751946	+	Cyld	protein_coding	0.414348	7.42784	2.87261	0.00608879	0.102242
Myo16	8	10153911	10634743	+	Myo16	protein_coding	0.443929	4.87519	2.87181	0.00610187	0.102242
Lmo7	14	101729957	101934711	+	Lmo7	protein_coding	0.356375	6.08469	2.87171	0.00610352	0.102242
Pigt	2	164497520	164508302	+	Pigt	protein_coding	0.384428	5.74202	2.87158	0.00610573	0.102242
Yaf2	15	93284278	93336936	-	Yaf2	protein_coding	-0.271292	6.9406	-2.87084	0.00611788	0.102242
Dgcr2	16	17839482	17898563	-	Dgcr2	protein_coding	0.228777	6.84377	2.87036	0.00612567	0.102242
Cstf2	X	134059187	134086820	+	Cstf2	protein_coding	0.309973	7.04625	2.87032	0.00612635	0.102242
Sema3d	5	12383385	12588949	+	Sema3d	protein_coding	-0.420495	3.07578	-2.86995	0.0061325	0.102242
Mmp9	2	164940780	164955851	+	Mmp9	protein_coding	0.296267	1.22397	2.86969	0.00613668	0.102242
Cluh	11	74649495	74670848	+	Cluh	protein_coding	0.243441	6.52385	2.86945	0.00614068	0.102242
Atg9a	1	75180860	75192197	-	Atg9a	protein_coding	0.427013	7.06982	2.86927	0.00614365	0.102242
Zfp212	6	47920476	47932640	+	Zfp212	protein_coding	0.229796	4.1363	2.869	0.0061481	0.102242
Pcdhga2	18	37668953	37841871	+	Pcdhga2	protein_coding	0.530408	4.84834	2.86889	0.00614987	0.102242
Trpc4ap	2	155634271	155692385	-	Trpc4ap	protein_coding	0.208533	7.12055	2.86858	0.00615501	0.102242
B2m	2	122147686	122153084	+	B2m	protein_coding	-0.30416	7.19389	-2.86745	0.00617381	0.102454
Brpf3	17	28801090	28839950	+	Brpf3	protein_coding	0.501503	5.46261	2.8668	0.0061845	0.102516
Fbrs	7	127479199	127491712	+	Fbrs	protein_coding	0.499391	4.7608	2.86649	0.00618965	0.102516
Pacs1	19	5133688	5273120	-	Pacs1	protein_coding	0.451977	6.60828	2.8661	0.00619623	0.102525
Atp9a	2	168634438	168742410	-	Atp9a	protein_coding	0.246408	7.67726	2.86555	0.00620533	0.102575
Dhx16	17	35879819	35892671	+	Dhx16	protein_coding	0.380855	4.32469	2.86484	0.00621715	0.102671
A730020E08Rik	6	61172293	61180811	-	A730020E08Rik	bidirectional_promoter_lncRNA	-0.443373	2.24402	-2.86375	0.00623524	0.102803
Cul9	17	46500572	46546389	-	Cul9	protein_coding	0.521538	5.41506	2.8633	0.00624291	0.102803
Chrna5	9	54980880	55007780	+	Chrna5	protein_coding	-0.545398	2.73499	-2.86301	0.00624777	0.102803
Eps15l1	8	72340999	72421461	-	Eps15l1	protein_coding	0.280394	5.65967	2.86291	0.00624938	0.102803
Mtg2	2	180070588	180085903	+	Mtg2	protein_coding	-0.394725	3.4251	-2.86149	0.00627325	0.103095
Sema4b	7	80186841	80226528	+	Sema4b	protein_coding	0.320484	4.0069	2.86041	0.00629133	0.103208
Atp5e	2	174461072	174464106	-	Atp5e	protein_coding	-0.444689	5.82376	-2.85985	0.0063008	0.103208
Sod2	17	13006846	13040064	+	Sod2	protein_coding	-0.22618	7.40163	-2.85896	0.00631587	0.103208
Rbm20	19	53677306	53867081	+	Rbm20	protein_coding	0.382363	2.66116	2.85883	0.00631804	0.103208
Smpd3	8	106252548	106337989	-	Smpd3	protein_coding	0.370856	6.9869	2.85844	0.00632473	0.103208
Bid	6	120891930	120916854	-	Bid	protein_coding	-0.291911	3.74374	-2.85825	0.00632794	0.103208
Eef2k	7	120842831	120907451	+	Eef2k	protein_coding	0.289096	5.22077	2.85787	0.00633434	0.103208
Zfp574	7	25072567	25083493	+	Zfp574	protein_coding	0.509821	5.03247	2.8572	0.00634564	0.103208
Nqo2	13	33964687	33988444	+	Nqo2	protein_coding	-0.393602	3.68765	-2.85707	0.00634796	0.103208
Gpr34	X	13632089	13640859	+	Gpr34	protein_coding	-0.397629	4.69717	-2.85642	0.00635906	0.103208
Bcl2a1a	9	88956900	88962420	+	Bcl2a1a	protein_coding	-0.319737	0.458575	-2.8558	0.00636946	0.103208
Cldn20	17	3532554	3533214	+	Cldn20	protein_coding	0.276865	0.460136	2.85557	0.00637341	0.103208
Gja1	10	56377330	56402514	+	Gja1	protein_coding	-0.203175	8.26404	-2.8551	0.00638143	0.103208
Slc35c1	2	92452764	92460539	-	Slc35c1	protein_coding	0.359988	4.48966	2.85465	0.00638926	0.103208
Ahdc1	4	133011260	133078111	+	Ahdc1	protein_coding	0.540961	5.50967	2.85439	0.00639368	0.103208
Brat1	5	140705011	140719380	+	Brat1	protein_coding	0.443289	4.13203	2.85412	0.00639823	0.103208
Lrfn3	7	30355489	30362773	-	Lrfn3	protein_coding	0.447364	4.40514	2.85408	0.00639887	0.103208
Cdk14	5	4803391	5420313	-	Cdk14	protein_coding	-0.356793	7.9439	-2.85398	0.00640072	0.103208
Prss23	7	89507783	89527188	-	Prss23	protein_coding	-0.398244	4.99694	-2.8519	0.00643629	0.103208
Maob	X	16709282	16817367	-	Maob	protein_coding	-0.268752	5.2538	-2.85172	0.00643944	0.103208
Pnn	12	59066884	59073999	+	Pnn	protein_coding	0.203028	6.43347	2.85158	0.0064419	0.103208
Uvssa	5	33378549	33419755	+	Uvssa	protein_coding	0.34755	3.81673	2.85083	0.00645476	0.103208
C030018K13Rik	5	64477008	64483968	+	C030018K13Rik	lincRNA	-0.390505	1.52547	-2.85083	0.00645488	0.103208
Cep250	2	155956458	155998901	+	Cep250	protein_coding	0.574048	4.6944	2.85052	0.00646014	0.103208
Camsap3	8	3587293	3609076	+	Camsap3	protein_coding	0.355728	4.36291	2.85034	0.0064632	0.103208
Supt5	7	28314891	28338747	-	Supt5	protein_coding	0.27463	6.80179	2.8502	0.0064657	0.103208
Tnk2os	16	32665223	32668198	-	Tnk2os	antisense	0.313103	1.46513	2.85019	0.00646583	0.103208
Ip6k3	17	27143969	27167765	-	Ip6k3	protein_coding	-0.435233	1.13767	-2.8501	0.00646744	0.103208
Aurkaip1	4	155831272	155833131	+	Aurkaip1	protein_coding	-0.389717	5.77098	-2.84983	0.00647207	0.103208
H2-D1	17	35262730	35267500	+	H2-D1	protein_coding	-0.335569	5.19959	-2.84975	0.00647342	0.103208
Lrg1	17	56119678	56122002	-	Lrg1	protein_coding	0.353166	1.06729	2.84896	0.00648714	0.103208
Pnrc2	4	135870918	135873851	-	Pnrc2	protein_coding	-0.291169	6.10083	-2.84876	0.00649071	0.103208
Ablim2	5	35757880	35884974	+	Ablim2	protein_coding	0.294474	7.30523	2.84858	0.00649375	0.103208
Sik3	9	46012820	46224195	+	Sik3	protein_coding	0.416667	6.94848	2.84857	0.00649389	0.103208
Aox4	1	58210397	58268598	+	Aox4	protein_coding	0.539616	0.895573	2.84836	0.00649759	0.103208
Gm15328	18	16815721	16822784	+	Gm15328	lincRNA	0.47925	1.96615	2.8478	0.00650733	0.103208
Tubgcp5	7	55794154	55831678	+	Tubgcp5	protein_coding	0.336138	4.74354	2.84733	0.00651557	0.103208
Cnih1	14	46775567	46788412	-	Cnih1	protein_coding	-0.281916	6.52518	-2.84726	0.00651666	0.103208
Sgca	11	94962791	94976328	-	Sgca	protein_coding	0.237531	0.39148	2.84722	0.00651741	0.103208
Adk	14	21052574	21448570	+	Adk	protein_coding	-0.353025	5.64941	-2.84619	0.00653532	0.10338
Arhgap5	12	52503972	52571976	+	Arhgap5	protein_coding	-0.496074	7.01887	-2.84576	0.00654281	0.10338
Hs6st1	1	36068400	36106447	+	Hs6st1	protein_coding	0.299606	6.32628	2.84529	0.00655114	0.10338
Mbd6	10	127281956	127289019	-	Mbd6	protein_coding	0.757747	4.61577	2.845	0.00655614	0.10338
Trabd2b	4	114406724	114615099	+	Trabd2b	protein_coding	0.598383	3.09785	2.84331	0.0065859	0.10338
Aldh18a1	19	40550257	40588464	-	Aldh18a1	protein_coding	0.325617	4.50543	2.84328	0.00658629	0.10338
Slc5a5	8	70882889	70892758	-	Slc5a5	protein_coding	0.303871	4.80789	2.84279	0.00659491	0.10338
Phf13	4	151989633	151996259	-	Phf13	protein_coding	0.319425	4.5215	2.84268	0.00659701	0.10338
Cenpw	10	30194569	30200561	-	Cenpw	protein_coding	-0.555061	2.16612	-2.84264	0.00659757	0.10338
Map3k12	15	102497646	102517065	-	Map3k12	protein_coding	0.277406	6.81821	2.84249	0.00660033	0.10338
Pgm2l1	7	100227394	100278869	+	Pgm2l1	protein_coding	-0.385566	9.1027	-2.84248	0.00660041	0.10338
Slc35c2	2	165276554	165287870	-	Slc35c2	protein_coding	0.392369	5.10532	2.84238	0.00660225	0.10338
4933407L21Rik	1	85928483	85940625	+	4933407L21Rik	protein_coding	-0.527915	2.12392	-2.84201	0.0066088	0.10338
Steap3	1	120190757	120272706	-	Steap3	protein_coding	-0.440136	3.01122	-2.84125	0.00662215	0.10338
Cic	7	25267704	25294160	+	Cic	protein_coding	0.639755	6.91995	2.8411	0.00662479	0.10338
Ankrd34a	3	96596636	96599776	+	Ankrd34a	protein_coding	0.351714	6.26385	2.84086	0.00662902	0.10338
Pcnx2	8	125751508	125898318	-	Pcnx2	protein_coding	0.388796	6.47585	2.84005	0.00664335	0.10338
Bsn	9	108096022	108190385	-	Bsn	protein_coding	0.592486	8.77748	2.83919	0.00665867	0.10338
Pcdhgc4	18	37815079	37841874	+	Pcdhgc4	protein_coding	0.874814	5.51584	2.83892	0.00666344	0.10338
Rnf38	4	44126210	44233790	-	Rnf38	protein_coding	0.408415	5.97113	2.83883	0.00666512	0.10338
Mmel1	4	154869585	154895529	+	Mmel1	protein_coding	-0.27253	0.703698	-2.83818	0.00667656	0.10338
Klhl18	9	110425926	110476695	-	Klhl18	protein_coding	0.399495	5.32729	2.83807	0.00667861	0.10338
Tubb4a	17	57080066	57087783	-	Tubb4a	protein_coding	0.361793	10.2715	2.83778	0.0066837	0.10338
Tctn1	5	122237848	122264461	-	Tctn1	protein_coding	0.423199	4.44631	2.83719	0.00669433	0.10338
Cyp11a1	9	58006411	58027024	+	Cyp11a1	protein_coding	-0.414716	1.90066	-2.83697	0.00669829	0.10338
Cyth1	11	118132019	118248593	-	Cyth1	protein_coding	0.248125	5.82909	2.83667	0.00670357	0.10338
Abcc3	11	94343295	94392998	-	Abcc3	protein_coding	0.361615	1.80423	2.83663	0.00670433	0.10338
Qk	17	10202601	10319855	-	Qk	protein_coding	-0.247814	8.41137	-2.83646	0.00670739	0.10338
Pla2g2d	4	138775735	138782047	+	Pla2g2d	protein_coding	-0.232345	0.429671	-2.8363	0.00671016	0.10338
Stag1	9	100597798	100959376	+	Stag1	protein_coding	0.311553	5.16788	2.83625	0.00671117	0.10338
Timp3	10	86300372	86349507	+	Timp3	protein_coding	-0.259811	7.30384	-2.83541	0.00672616	0.103464
Mcc	18	44425060	44812183	-	Mcc	protein_coding	0.379024	3.98875	2.83526	0.00672882	0.103464
Rnf26	9	44095631	44113518	-	Rnf26	protein_coding	0.387959	4.95992	2.83416	0.00674855	0.103652
Rer1	4	155074110	155086383	-	Rer1	protein_coding	-0.336788	5.86102	-2.83387	0.0067539	0.103652
Slc25a27	17	43641891	43667215	-	Slc25a27	protein_coding	0.251504	5.76921	2.83356	0.00675935	0.103652
Akap1	11	88830792	88864587	-	Akap1	protein_coding	0.258805	5.46551	2.83277	0.00677363	0.103777
Zfyve26	12	79232346	79296305	-	Zfyve26	protein_coding	0.446929	4.49937	2.83221	0.00678382	0.10382
Dlg3	X	100767722	100818411	+	Dlg3	protein_coding	0.257733	7.5995	2.83074	0.00681036	0.10382
Akap8	17	32303676	32321154	-	Akap8	protein_coding	0.239217	6.53841	2.83073	0.00681052	0.10382
Ost4	5	30905885	30907789	-	Ost4	protein_coding	-0.342688	4.4442	-2.8307	0.00681108	0.10382
Acap3	4	155891822	155907252	+	Acap3	protein_coding	0.375358	6.84602	2.83064	0.00681222	0.10382
Agfg2	5	137650463	137684727	-	Agfg2	protein_coding	0.308829	5.35981	2.83059	0.00681317	0.10382
Nckap5l	15	99422035	99457749	-	Nckap5l	protein_coding	0.741535	3.79248	2.83017	0.00682069	0.103841
Tmem104	11	115187487	115247024	+	Tmem104	protein_coding	0.49995	4.12731	2.82949	0.00683303	0.103872
Pla2g3	11	3488284	3499351	+	Pla2g3	protein_coding	0.460582	1.75098	2.82939	0.00683495	0.103872
Akap12	10	4266380	4359471	+	Akap12	protein_coding	0.311946	4.94523	2.82884	0.00684486	0.103921
Celf3	3	94478295	94492199	+	Celf3	protein_coding	0.474825	6.64992	2.82793	0.00686146	0.103921
Dmrt2	19	25672420	25679011	+	Dmrt2	protein_coding	-0.408319	1.39189	-2.82709	0.00687699	0.103921
Klc2	19	5107746	5118561	-	Klc2	protein_coding	0.306504	7.74159	2.8269	0.0068804	0.103921
Mylk	16	34745210	35002421	+	Mylk	protein_coding	-0.360381	4.43021	-2.82684	0.00688149	0.103921
Prr14	7	127459611	127476760	+	Prr14	protein_coding	0.335943	4.32099	2.8266	0.00688591	0.103921
Polr3e	7	120917744	120947433	+	Polr3e	protein_coding	0.327753	5.10593	2.82645	0.00688867	0.103921
Bcl7a	5	123343834	123374993	+	Bcl7a	protein_coding	0.278336	6.77933	2.82609	0.00689526	0.103921
Serpinb6a	13	33917918	34002795	-	Serpinb6a	protein_coding	-0.322787	4.62413	-2.82589	0.00689888	0.103921
Jakmip1	5	37028335	37150608	+	Jakmip1	protein_coding	0.265641	5.90922	2.82542	0.00690754	0.103921
Il18	9	50554827	50581841	+	Il18	protein_coding	-0.42139	3.96695	-2.82473	0.0069203	0.103921
Mbtps1	8	119508156	119558736	-	Mbtps1	protein_coding	0.27037	6.35985	2.82365	0.00694009	0.103921
Rab28	5	41624976	41708158	-	Rab28	protein_coding	-0.358632	5.62538	-2.8236	0.00694103	0.103921
Btbd9	17	30215524	30576288	-	Btbd9	protein_coding	0.254242	6.4651	2.82289	0.00695416	0.103921
Myom3	4	135759715	135815565	+	Myom3	protein_coding	-0.36496	2.45319	-2.82245	0.0069623	0.103921
Calm1	12	100199435	100209815	+	Calm1	protein_coding	-0.243088	11.9087	-2.82242	0.00696284	0.103921
Plxna1	6	89316314	89362621	-	Plxna1	protein_coding	0.547405	6.77203	2.82222	0.00696668	0.103921
Plagl1	10	13060504	13131695	+	Plagl1	protein_coding	0.51418	5.27995	2.82219	0.00696724	0.103921
Sncg	14	34370274	34374790	-	Sncg	protein_coding	-0.599121	1.81273	-2.82208	0.00696925	0.103921
Pcdhb7	18	37341702	37345203	+	Pcdhb7	protein_coding	-0.382129	3.81941	-2.8216	0.00697814	0.103921
Gm13629	2	66440880	66546027	+	Gm13629	antisense	0.39857	2.61379	2.82156	0.00697876	0.103921
Tusc3	8	39005845	39165115	+	Tusc3	protein_coding	-0.302669	6.88749	-2.82155	0.00697899	0.103921
Gak	5	108569411	108629756	-	Gak	protein_coding	0.205708	6.57974	2.82155	0.0069791	0.103921
Med26	8	72494561	72548271	-	Med26	protein_coding	0.508682	3.57012	2.82044	0.00699957	0.104095
Syt2	1	134646677	134762594	+	Syt2	protein_coding	0.544127	5.29741	2.82025	0.00700312	0.104095
Sfxn3	19	45047576	45056384	+	Sfxn3	protein_coding	0.349049	7.02658	2.81962	0.00701493	0.10418
Cox6b1	7	30616861	30626152	-	Cox6b1	protein_coding	-0.385064	7.02979	-2.81872	0.00703179	0.104193
Gm5141	13	62772200	62785809	-	Gm5141	protein_coding	-0.467394	2.84261	-2.81851	0.00703563	0.104193
Ltbp3	19	5740904	5758533	+	Ltbp3	protein_coding	0.423134	4.48478	2.81847	0.0070364	0.104193
Trappc6b	12	59043092	59061473	-	Trappc6b	protein_coding	0.259156	5.35672	2.8182	0.00704149	0.104193
Erc1	6	119570796	119848168	-	Erc1	protein_coding	0.36809	5.92394	2.81773	0.00705024	0.104193
Gk	X	85701937	85776820	-	Gk	protein_coding	-0.380509	4.47813	-2.8176	0.00705271	0.104193
Ttc34	4	154837459	154867128	+	Ttc34	protein_coding	0.39951	1.84187	2.81679	0.00706781	0.104326
Trim21	7	102557921	102565487	-	Trim21	protein_coding	-0.431252	1.86592	-2.81643	0.00707468	0.104336
Tspan15	10	62185396	62231252	-	Tspan15	protein_coding	-0.311008	4.02852	-2.81508	0.00709997	0.104486
Mnt	11	74830920	74845726	+	Mnt	protein_coding	0.514414	5.46053	2.81507	0.00710018	0.104486
Rnps1	17	24414675	24425896	+	Rnps1	protein_coding	0.278013	6.29557	2.81491	0.00710332	0.104486
Oxgr1	14	120019585	120042436	-	Oxgr1	protein_coding	0.322136	0.666097	2.81382	0.00712376	0.104696
Lrat	3	82892579	82903974	-	Lrat	protein_coding	-0.194533	0.392226	-2.81297	0.00714	0.104844
Abcc1	16	14361558	14475738	+	Abcc1	protein_coding	0.386827	4.47915	2.81262	0.00714662	0.10485
Trim37	11	87127077	87220684	+	Trim37	protein_coding	-0.269453	8.99255	-2.81121	0.00717331	0.105075
Fbf1	11	116142285	116168167	-	Fbf1	protein_coding	0.35107	5.78253	2.81116	0.00717431	0.105075
Gpatch8	11	102475915	102556393	-	Gpatch8	protein_coding	0.395452	6.76905	2.8101	0.00719447	0.105257
Raf1	6	115618067	115676636	-	Raf1	protein_coding	0.207154	5.91978	2.80944	0.00720723	0.105257
H6pd	4	149979475	150009024	-	H6pd	protein_coding	0.343062	3.56379	2.80932	0.00720943	0.105257
Spen	4	141467890	141538598	-	Spen	protein_coding	0.692795	5.85913	2.80921	0.00721159	0.105257
Cdk9	2	32705784	32713077	-	Cdk9	protein_coding	0.281283	6.03462	2.80861	0.00722305	0.105333
Nkain4	2	180934772	180954700	-	Nkain4	protein_coding	-0.441322	4.31724	-2.80629	0.00726752	0.105697
Lingo1	9	56618475	56796469	-	Lingo1	protein_coding	0.354294	8.42711	2.80614	0.00727043	0.105697
Atmin	8	116943393	116960446	+	Atmin	protein_coding	0.221285	7.16907	2.80576	0.00727785	0.105697
Gm16287	4	139175405	139180656	-	Gm16287	antisense	0.355053	0.858469	2.80534	0.00728585	0.105697
Ccni	5	93181933	93206496	-	Ccni	protein_coding	-0.273195	8.08519	-2.80526	0.0072875	0.105697
Mlxip	5	123394798	123457933	+	Mlxip	protein_coding	0.507185	5.0823	2.80507	0.00729113	0.105697
Canx	11	50293961	50325674	-	Canx	protein_coding	-0.23393	8.59698	-2.80505	0.00729161	0.105697
Nup62	7	44816088	44830813	+	Nup62	protein_coding	0.190456	5.33625	2.80399	0.00731211	0.105904
Clasp1	1	118389058	118612679	+	Clasp1	protein_coding	0.308204	6.86187	2.80298	0.0073316	0.105994
Terf2	8	107069400	107096548	-	Terf2	protein_coding	0.252492	5.4343	2.80293	0.0073327	0.105994
Slc2a4rg-ps	2	181384250	181387587	+	Slc2a4rg-ps	transcribed_unitary_pseudogene	0.552509	2.7744	2.80236	0.00734372	0.105994
Cinp	12	110872610	110889146	-	Cinp	protein_coding	-0.274545	5.64503	-2.80201	0.00735056	0.105994
Mib2	4	155654677	155669199	-	Mib2	protein_coding	0.408941	5.60669	2.8019	0.00735268	0.105994
Ccdc150	1	54250683	54368728	+	Ccdc150	protein_coding	0.158728	0.227693	2.80157	0.00735901	0.105994
Cacna1a	8	84388440	84640247	+	Cacna1a	protein_coding	0.412286	6.77706	2.80142	0.00736209	0.105994
Zfp282	6	47877204	47908486	+	Zfp282	protein_coding	0.271835	4.12848	2.80036	0.00738265	0.1062
Cwc15	9	14500617	14510578	+	Cwc15	protein_coding	-0.265442	5.26378	-2.79978	0.00739409	0.106274
Nat8f1	6	85910154	85915688	-	Nat8f1	protein_coding	-0.369881	3.48554	-2.79903	0.00740869	0.106394
Syvn1	19	6046576	6053713	+	Syvn1	protein_coding	0.416908	5.32261	2.79813	0.00742651	0.106485
Shisa6	11	66211725	66525965	-	Shisa6	protein_coding	0.538137	4.34922	2.79807	0.00742755	0.106485
Acadl	1	66830839	66863278	-	Acadl	protein_coding	-0.323474	5.3652	-2.79721	0.00744446	0.10654
Cldn10	14	118787908	118875490	+	Cldn10	protein_coding	-0.382516	4.82803	-2.7968	0.00745256	0.10654
Ftl1	7	45457944	45459885	-	Ftl1	protein_coding	-0.53795	6.56181	-2.79658	0.00745694	0.10654
Sipa1l3	7	29320372	29518642	-	Sipa1l3	protein_coding	0.557316	5.08166	2.79606	0.00746724	0.10654
Midn	10	80148272	80158369	+	Midn	protein_coding	0.449487	5.60484	2.79587	0.00747093	0.10654
Tmem64	4	15265831	15286754	+	Tmem64	protein_coding	-0.318341	6.12696	-2.79566	0.00747523	0.10654
B3galnt2	13	13954469	13999104	+	B3galnt2	protein_coding	0.272256	4.61627	2.79502	0.00748774	0.10654
Nacad	11	6597823	6606054	-	Nacad	protein_coding	0.360634	5.64882	2.79502	0.00748782	0.10654
Fndc4	5	31292242	31296081	-	Fndc4	protein_coding	-0.289944	6.54428	-2.79424	0.00750327	0.10654
Ctsh	9	90054152	90076090	+	Ctsh	protein_coding	-0.383665	3.10898	-2.794	0.00750797	0.10654
Nacc1	8	84670483	84687863	-	Nacc1	protein_coding	0.294511	7.2467	2.79384	0.00751114	0.10654
Decr1	4	15917240	15945508	-	Decr1	protein_coding	-0.432754	4.45389	-2.79376	0.00751271	0.10654
Lin28b	10	45376620	45486396	-	Lin28b	protein_coding	0.440753	3.08776	2.79375	0.00751306	0.10654
Ppp1r13b	12	111828457	111908111	-	Ppp1r13b	protein_coding	0.2406	6.40596	2.7927	0.00753385	0.106693
Fam78a	2	32050055	32084858	-	Fam78a	protein_coding	0.422785	3.47057	2.79191	0.0075497	0.106693
Mzt2	16	15848441	15863370	-	Mzt2	protein_coding	-0.289043	4.0352	-2.79146	0.00755854	0.106693
Cep131	11	120064430	120086828	-	Cep131	protein_coding	0.363296	3.33338	2.79124	0.00756306	0.106693
Srebf2	15	82147181	82205380	+	Srebf2	protein_coding	0.292642	7.4182	2.79103	0.00756717	0.106693
Ralgds	2	28513125	28553082	+	Ralgds	protein_coding	0.33262	6.46803	2.79017	0.00758438	0.106693
Adgrl1	8	83900105	83941955	+	Adgrl1	protein_coding	0.319188	9.41352	2.7901	0.00758578	0.106693
Samd9l	6	3372257	3399573	-	Samd9l	protein_coding	-0.518897	3.17058	-2.78956	0.00759661	0.106693
Chst12	5	140505550	140525725	+	Chst12	protein_coding	0.401548	4.64552	2.78954	0.00759708	0.106693
Trappc9	15	72589620	73061205	-	Trappc9	protein_coding	0.297256	5.71276	2.78926	0.00760272	0.106693
Mapkbp1	2	119972699	120027409	+	Mapkbp1	protein_coding	0.416519	6.18109	2.78915	0.00760501	0.106693
Casq2	3	102086415	102146515	+	Casq2	protein_coding	-0.49787	1.82082	-2.78909	0.00760611	0.106693
Crhbp	13	95431371	95444925	-	Crhbp	protein_coding	-0.386335	4.4537	-2.78883	0.00761126	0.106693
Airn	17	12741311	12860137	+	Airn	antisense	-0.273421	0.676786	-2.7888	0.00761193	0.106693
Tmem106b	6	13069759	13089270	+	Tmem106b	protein_coding	-0.302475	7.99652	-2.78762	0.00763577	0.106739
9930104L06Rik	4	124937048	124944657	+	9930104L06Rik	protein_coding	-0.338008	4.29189	-2.78745	0.00763913	0.106739
Itm2a	X	107397099	107403377	-	Itm2a	protein_coding	-0.252	5.69676	-2.78739	0.00764027	0.106739
Nelfa	5	33897916	33936414	-	Nelfa	protein_coding	0.229078	4.33676	2.78739	0.00764037	0.106739
Dhx30	9	110084320	110117831	-	Dhx30	protein_coding	0.295697	6.35015	2.7851	0.00768669	0.107215
Dclk2	3	86786151	86920853	-	Dclk2	protein_coding	0.325202	5.73684	2.7849	0.00769086	0.107215
Tmem132b	5	125531774	125792584	+	Tmem132b	protein_coding	0.349736	7.83788	2.78433	0.00770236	0.107215
Naa50	16	44139830	44163367	+	Naa50	protein_coding	-0.290584	6.61329	-2.78394	0.00771025	0.107215
Nfe2l1	11	96817414	96829969	-	Nfe2l1	protein_coding	0.187216	8.44144	2.78384	0.00771229	0.107215
Ocel1	8	71371298	71379362	+	Ocel1	protein_coding	-0.373287	2.86018	-2.78383	0.00771243	0.107215
Ppp2r1a	17	20945311	20965917	+	Ppp2r1a	protein_coding	0.176994	8.77692	2.78344	0.00772047	0.107239
Il10rb	16	91406164	91425835	+	Il10rb	protein_coding	-0.537754	3.5727	-2.78216	0.00774665	0.107403
Slc7a8	14	54722209	54781947	-	Slc7a8	protein_coding	0.427658	6.60759	2.78163	0.00775746	0.107403
Hmgcs1	13	119690379	119708261	+	Hmgcs1	protein_coding	-0.319587	8.42218	-2.78143	0.00776161	0.107403
Slc45a1	4	150628572	150652175	-	Slc45a1	protein_coding	0.338714	5.79813	2.78133	0.00776365	0.107403
Brip1os	11	86201370	86304444	+	Brip1os	antisense	-0.286165	4.41773	-2.78131	0.00776394	0.107403
Hey1	3	8663359	8667257	-	Hey1	protein_coding	-0.184644	5.93369	-2.78071	0.00777629	0.107487
Arl16	11	120464866	120467608	-	Arl16	protein_coding	-0.229337	4.72145	-2.78032	0.00778438	0.107511
Noc3l	19	38788128	38819238	-	Noc3l	protein_coding	0.343897	4.03027	2.7792	0.00780728	0.107739
Gdpd3	7	126766334	126775650	+	Gdpd3	protein_coding	0.294084	0.516375	2.77876	0.00781642	0.107767
Ppa1	10	61648552	61674169	+	Ppa1	protein_coding	-0.249876	5.8423	-2.77826	0.0078266	0.107767
Plod3	5	136987019	136996649	+	Plod3	protein_coding	0.40614	4.22933	2.77774	0.0078374	0.107767
Ccar2	14	70138164	70153812	-	Ccar2	protein_coding	0.221792	6.39523	2.77733	0.00784599	0.107767
Elp3	14	65530449	65593076	-	Elp3	protein_coding	0.20611	6.37518	2.77724	0.00784786	0.107767
Nek7	1	138482875	138620142	-	Nek7	protein_coding	-0.324642	6.3173	-2.77647	0.00786374	0.107767
Kctd18	1	57955101	58018957	-	Kctd18	protein_coding	0.316883	3.49801	2.77554	0.0078831	0.107767
Tnfaip8	18	49979427	50107174	+	Tnfaip8	protein_coding	-0.452337	3.36247	-2.77507	0.00789272	0.107767
Pln	10	53337667	53345988	+	Pln	protein_coding	-0.392139	1.23364	-2.7745	0.0079047	0.107767
Asic1	15	99670368	99701131	+	Asic1	protein_coding	0.334575	6.35611	2.77351	0.00792532	0.107767
Rtbdn	8	84946991	84956604	+	Rtbdn	protein_coding	0.378224	1.55976	2.77342	0.00792722	0.107767
Mfsd10	5	34633642	34637213	-	Mfsd10	protein_coding	0.424932	2.87107	2.77316	0.00793252	0.107767
Acad11	9	104063377	104127726	+	Acad11	protein_coding	-0.281875	4.66741	-2.77308	0.00793423	0.107767
Tecpr2	12	110889264	110972395	+	Tecpr2	protein_coding	0.307221	6.68631	2.77307	0.00793446	0.107767
Smarcd1	15	99702129	99713992	+	Smarcd1	protein_coding	0.350385	7.60035	2.77302	0.00793545	0.107767
Vmn2r53	7	12562851	12608789	-	Vmn2r53	protein_coding	0.103301	0.0734236	2.77283	0.00793942	0.107767
Cntnap1	11	101170523	101190725	+	Cntnap1	protein_coding	0.487356	7.94407	2.77278	0.00794049	0.107767
Rusc2	4	43381979	43427089	+	Rusc2	protein_coding	0.497549	6.56774	2.77269	0.00794242	0.107767
Phrf1	7	141228784	141262751	+	Phrf1	protein_coding	0.350732	5.65617	2.77266	0.0079431	0.107767
4933413J09Rik	14	26356574	26400457	+	4933413J09Rik	lincRNA	0.163918	0.240759	2.77078	0.00798255	0.107767
Rexo1	10	80540922	80561561	-	Rexo1	protein_coding	0.496489	5.25781	2.77074	0.00798339	0.107767
Scrn3	2	73312601	73337819	+	Scrn3	protein_coding	-0.26848	5.60109	-2.77069	0.00798435	0.107767
43533	10	127055011	127060185	-	43533	protein_coding	0.44317	4.05175	2.77053	0.00798774	0.107767
Eif4b	15	102073773	102097174	+	Eif4b	protein_coding	0.121817	7.76462	2.76982	0.00800267	0.107767
Hcfc1	X	73942792	73966358	-	Hcfc1	protein_coding	0.378476	6.80705	2.76981	0.00800282	0.107767
Sfmbt2	2	10370510	10595254	+	Sfmbt2	protein_coding	0.359254	2.21301	2.76956	0.00800813	0.107767
Ccnl1	3	65946151	65958250	-	Ccnl1	protein_coding	0.333884	4.80038	2.76956	0.00800817	0.107767
Brsk2	7	141949751	142004248	+	Brsk2	protein_coding	0.314521	7.18257	2.76913	0.00801725	0.107767
Zfp296	7	19577287	19580657	+	Zfp296	protein_coding	0.40947	2.00931	2.76907	0.00801854	0.107767
Stxbp1	2	32787602	32847246	-	Stxbp1	protein_coding	0.435011	9.7635	2.76825	0.00803581	0.107767
Npcd	15	79789675	79834238	-	Npcd	protein_coding	0.463787	6.85497	2.76822	0.00803638	0.107767
Kdm2a	19	4314419	4398286	-	Kdm2a	protein_coding	0.316552	6.8249	2.76779	0.00804562	0.107767
Hgs	11	120467635	120483985	+	Hgs	protein_coding	0.330806	5.26798	2.76738	0.00805431	0.107767
Dhrs4	14	55478758	55490341	+	Dhrs4	protein_coding	-0.430884	3.06328	-2.76737	0.00805446	0.107767
Elmsan1	12	84149176	84218882	-	Elmsan1	protein_coding	0.418081	4.8476	2.76712	0.00805964	0.107767
Fry	5	150118645	150497754	+	Fry	protein_coding	0.409922	6.78051	2.76679	0.00806672	0.107767
Dr1	5	108268897	108280527	+	Dr1	protein_coding	-0.318646	5.78092	-2.76675	0.00806751	0.107767
Fgf1	18	38838673	38929405	-	Fgf1	protein_coding	-0.250792	6.57404	-2.76631	0.00807693	0.107767
Gpc3	X	52272426	52613951	-	Gpc3	protein_coding	0.6162	2.04439	2.76627	0.00807771	0.107767
Aig1	10	13647054	13868981	-	Aig1	protein_coding	-0.223308	4.3575	-2.76552	0.00809363	0.107767
Clic1	17	35049966	35058750	+	Clic1	protein_coding	-0.425399	3.25072	-2.76459	0.00811353	0.107767
Cdk8	5	146231230	146302875	+	Cdk8	protein_coding	0.320797	4.03901	2.76389	0.00812855	0.107767
Icmt	4	152297227	152307122	+	Icmt	protein_coding	0.321393	6.36286	2.76388	0.0081287	0.107767
Mov10	3	104794836	104818564	-	Mov10	protein_coding	0.478617	2.4348	2.76329	0.00814123	0.107767
Adgrb1	15	74516195	74589466	+	Adgrb1	protein_coding	0.522905	7.71273	2.76204	0.00816801	0.107767
Gfy	7	45176349	45179570	-	Gfy	protein_coding	0.249963	0.50986	2.76192	0.00817057	0.107767
Nanos2	7	18987400	18988963	+	Nanos2	protein_coding	0.235357	0.587955	2.76172	0.00817495	0.107767
C130074G19Rik	1	184871926	184883219	-	C130074G19Rik	protein_coding	0.376728	6.72158	2.76168	0.00817577	0.107767
Lims2	18	31931325	31958620	+	Lims2	protein_coding	0.362723	3.47629	2.76115	0.00818723	0.107767
Ipo13	4	117894486	117915000	-	Ipo13	protein_coding	0.250754	6.28213	2.761	0.00819039	0.107767
Zfp868	8	69610857	69625549	-	Zfp868	protein_coding	-0.388203	4.28991	-2.76097	0.00819103	0.107767
43717	11	117199661	117362326	+	43717	protein_coding	0.24732	5.82733	2.76049	0.00820146	0.107767
Arhgap21	2	20847919	20968882	-	Arhgap21	protein_coding	0.320863	7.31509	2.76037	0.0082041	0.107767
Ufm1	3	53853376	53863831	-	Ufm1	protein_coding	-0.230778	6.303	-2.75995	0.00821308	0.107767
Cadm1	9	47530173	47857638	+	Cadm1	protein_coding	-0.258473	7.50775	-2.75966	0.00821941	0.107767
Pwwp2a	11	43681998	43721492	+	Pwwp2a	protein_coding	0.32477	4.84231	2.75932	0.00822676	0.107767
Adamts15	9	30899155	30922453	-	Adamts15	protein_coding	0.423636	2.82299	2.75912	0.00823108	0.107767
Setd6	8	95715881	95719011	+	Setd6	protein_coding	0.357121	3.45413	2.75905	0.00823259	0.107767
Fermt1	2	132904389	132945907	-	Fermt1	protein_coding	0.278584	0.415961	2.75903	0.00823297	0.107767
Gm7104	12	88284538	88287070	-	Gm7104	processed_pseudogene	0.467971	1.67231	2.75873	0.00823942	0.107767
Slc29a1	17	45585200	45599607	-	Slc29a1	protein_coding	0.376733	3.97471	2.75865	0.00824111	0.107767
Nrg2	18	36017707	36197381	-	Nrg2	protein_coding	0.449288	1.99379	2.75845	0.0082456	0.107767
Med9os	11	59946889	59948143	-	Med9os	antisense	-0.280127	0.738246	-2.75842	0.00824612	0.107767
Gbf1	19	46152509	46286511	+	Gbf1	protein_coding	0.413676	6.19115	2.7583	0.00824878	0.107767
Lrig2	3	104396418	104511919	-	Lrig2	protein_coding	0.320811	5.3841	2.75813	0.00825237	0.107767
2510039O18Rik	4	147940895	147947315	+	2510039O18Rik	protein_coding	0.319003	4.97701	2.75804	0.00825439	0.107767
Tmem131	1	36792191	36943667	-	Tmem131	protein_coding	0.36213	6.21019	2.75782	0.00825907	0.107767
Strada	11	106163330	106202169	-	Strada	protein_coding	0.271289	4.78327	2.75759	0.00826413	0.107767
Lsm14b	2	180024987	180035466	+	Lsm14b	protein_coding	0.233135	6.44485	2.75741	0.00826798	0.107767
Pcdhb11	18	37421418	37425837	+	Pcdhb11	protein_coding	0.46972	2.79252	2.75715	0.00827364	0.107767
Aff3	1	38177326	38664956	-	Aff3	protein_coding	0.294798	6.01773	2.75713	0.00827409	0.107767
Rusc1	3	89083981	89093312	-	Rusc1	protein_coding	0.281044	7.37866	2.75698	0.00827736	0.107767
Emp1	6	135362545	135383174	+	Emp1	protein_coding	-0.353668	1.42815	-2.75672	0.008283	0.107767
Zfp119b	17	55938381	55949501	-	Zfp119b	protein_coding	-0.446037	2.53117	-2.75669	0.00828376	0.107767
Ets2	16	95702075	95721052	+	Ets2	protein_coding	0.241695	6.46976	2.75632	0.00829168	0.107767
Tifa	3	127789805	127832165	+	Tifa	protein_coding	-0.38136	3.36711	-2.7563	0.00829218	0.107767
Slit3	11	35121224	35708508	+	Slit3	protein_coding	0.49439	3.84074	2.75534	0.00831304	0.107811
Trim68	7	102677582	102687328	-	Trim68	protein_coding	0.345183	2.55993	2.75533	0.00831327	0.107811
Cat	2	103453849	103485161	-	Cat	protein_coding	-0.204676	5.89533	-2.75505	0.00831933	0.107811
Wdr5	2	27515157	27536536	+	Wdr5	protein_coding	0.167194	5.11264	2.75498	0.00832103	0.107811
Plekha6	1	133164210	133303436	+	Plekha6	protein_coding	0.424207	6.99317	2.75371	0.00834868	0.108036
Arid3a	10	79927043	79955019	+	Arid3a	protein_coding	0.441534	2.77596	2.75346	0.0083542	0.108036
Pthlh	6	147252101	147264184	-	Pthlh	protein_coding	0.380763	1.93372	2.75331	0.00835752	0.108036
Itgb4	11	115974709	116008413	+	Itgb4	protein_coding	0.396695	3.40085	2.75274	0.00836999	0.108115
Tm9sf4	2	153161303	153210467	+	Tm9sf4	protein_coding	0.283173	6.47934	2.75156	0.00839591	0.108252
Arl4d	11	101665541	101667833	+	Arl4d	protein_coding	0.398287	5.02143	2.75153	0.00839653	0.108252
Dennd4b	3	90265185	90280670	+	Dennd4b	protein_coding	0.363049	5.30333	2.75139	0.00839977	0.108252
Arhgap10	8	77250366	77517954	-	Arhgap10	protein_coding	0.246191	4.49314	2.75077	0.00841332	0.108345
Capn10	1	92934376	92947942	+	Capn10	protein_coding	0.281689	4.29149	2.75003	0.00842965	0.108473
Cyp51	5	4081145	4104747	-	Cyp51	protein_coding	-0.224912	6.54212	-2.74875	0.00845811	0.108756
Eps15	4	109280268	109387818	+	Eps15	protein_coding	-0.259632	8.27772	-2.74671	0.00850341	0.109213
Ccdc9	7	16274042	16286796	-	Ccdc9	protein_coding	0.327057	4.47653	2.74641	0.00850995	0.109213
Lgi3	14	70530685	70538325	+	Lgi3	protein_coding	0.322628	6.86978	2.74628	0.00851291	0.109213
Rfesd	13	76001535	76018720	-	Rfesd	protein_coding	-0.335946	3.58066	-2.74599	0.00851939	0.109213
Scrt2	2	152081529	152095803	+	Scrt2	protein_coding	0.441417	4.48455	2.74481	0.00854573	0.109269
Gatad1	5	3632932	3657186	-	Gatad1	protein_coding	-0.279554	6.37466	-2.74468	0.00854875	0.109269
Dynll1	5	115297110	115301000	-	Dynll1	protein_coding	-0.345395	7.6126	-2.74431	0.00855711	0.109269
Nfix	8	84699876	84800345	-	Nfix	protein_coding	0.632233	7.37354	2.7438	0.00856851	0.109269
Gm13363	2	19992921	19993443	+	Gm13363	processed_pseudogene	-0.382932	3.78956	-2.74378	0.00856885	0.109269
Guk1	11	59183875	59192213	-	Guk1	protein_coding	-0.461555	6.05986	-2.74376	0.00856936	0.109269
Erbb3	10	128567523	128589653	-	Erbb3	protein_coding	0.367783	3.19326	2.74362	0.00857241	0.109269
Pkn1	8	83666536	83699180	-	Pkn1	protein_coding	0.257869	5.03751	2.74322	0.00858144	0.109269
Fam213a	14	40993740	41013789	-	Fam213a	protein_coding	-0.304207	7.01554	-2.74321	0.00858178	0.109269
Srrm2	17	23790532	23824742	+	Srrm2	protein_coding	0.614447	9.1134	2.74262	0.00859488	0.109297
Fbxo41	6	85469574	85502995	-	Fbxo41	protein_coding	0.456173	7.06461	2.74236	0.00860073	0.109297
Mien1	11	98437708	98438992	-	Mien1	protein_coding	-0.354843	5.94295	-2.74225	0.00860323	0.109297
Pigh	12	79080664	79089652	-	Pigh	protein_coding	-0.323813	4.33182	-2.74129	0.00862501	0.109483
Hsbp1	8	119344488	119348923	+	Hsbp1	protein_coding	-0.210728	7.82844	-2.7409	0.00863376	0.109483
Ulk1	5	110784488	110810098	-	Ulk1	protein_coding	0.225874	6.51957	2.74073	0.00863758	0.109483
Tmem184c	8	77595982	77610699	-	Tmem184c	protein_coding	-0.244073	6.94614	-2.74007	0.00865246	0.109483
Arid1a	4	133679008	133756770	-	Arid1a	protein_coding	0.507246	6.75718	2.73999	0.0086544	0.109483
Rdx	9	52047173	52088736	+	Rdx	protein_coding	-0.236352	6.40875	-2.73989	0.00865668	0.109483
Myadm	7	3289080	3300443	+	Myadm	protein_coding	0.454771	6.28833	2.73941	0.00866756	0.109539
Spata2	2	167481133	167492888	-	Spata2	protein_coding	0.25599	6.40995	2.73784	0.00870318	0.109901
Mybpc1	10	88518279	88605153	-	Mybpc1	protein_coding	0.539191	2.03723	2.73717	0.00871842	0.109901
Fut2	7	45648591	45666395	-	Fut2	protein_coding	0.332451	0.968533	2.73694	0.00872356	0.109901
Ndufb2	6	39592574	39603383	+	Ndufb2	protein_coding	-0.36722	4.41779	-2.73663	0.00873065	0.109901
Atp9b	18	80734141	80934059	-	Atp9b	protein_coding	0.267048	5.65477	2.73662	0.00873084	0.109901
Nr4a1	15	101254269	101274796	+	Nr4a1	protein_coding	0.58533	6.38233	2.73597	0.00874567	0.109901
Ftx	X	103560907	103623755	-	Ftx	lincRNA	0.502044	5.38921	2.73564	0.00875334	0.109901
Rbm25	12	83631236	83683124	+	Rbm25	protein_coding	0.187097	7.10196	2.73554	0.00875565	0.109901
Tmem56	3	121201761	121283099	-	Tmem56	protein_coding	-0.374341	6.76187	-2.73526	0.00876213	0.109901
St3gal4	9	35046576	35119269	-	St3gal4	protein_coding	-0.368319	4.59918	-2.73509	0.00876581	0.109901
Tle3	9	61372366	61418498	+	Tle3	protein_coding	0.44484	4.86157	2.73493	0.00876959	0.109901
Grap	11	61653265	61672785	+	Grap	protein_coding	-0.356737	2.63508	-2.73474	0.0087739	0.109901
Rptor	11	119602905	119899577	+	Rptor	protein_coding	0.235466	6.24819	2.73416	0.00878729	0.109987
Pcdhga4	18	37685210	37841874	+	Pcdhga4	protein_coding	0.512401	4.99463	2.73334	0.00880606	0.11002
Wwox	8	114439655	115352709	+	Wwox	protein_coding	-0.192187	4.82619	-2.73326	0.00880787	0.11002
Grid2ip	5	143357338	143392153	+	Grid2ip	protein_coding	0.54829	1.63794	2.7332	0.00880936	0.11002
Gm10037	13	67831106	67844036	+	Gm10037	protein_coding	0.351661	1.22531	2.73195	0.00883821	0.110214
Wiz	17	32354055	32389402	-	Wiz	protein_coding	0.549612	5.34581	2.73177	0.00884234	0.110214
Klhl5	5	65107539	65168189	+	Klhl5	protein_coding	-0.270942	5.4831	-2.73158	0.00884661	0.110214
Srek1	13	103739348	103774609	-	Srek1	protein_coding	0.289431	5.63674	2.7314	0.00885094	0.110214
Gm4070	7	105895139	105953968	-	Gm4070	protein_coding	-0.416094	2.42173	-2.73081	0.00886442	0.110297
Trim3	7	105604463	105633572	-	Trim3	protein_coding	0.268474	6.80526	2.73055	0.0088706	0.110297
Lat2	5	134600022	134615026	-	Lat2	protein_coding	-0.263193	1.56972	-2.73023	0.0088779	0.110307
Tle2	10	81574561	81590846	+	Tle2	protein_coding	0.548315	3.63917	2.72938	0.00889769	0.110416
Calhm2	19	47105353	47138295	-	Calhm2	protein_coding	0.375308	2.66766	2.72925	0.00890073	0.110416
Bcl9l	9	44482825	44511897	+	Bcl9l	protein_coding	0.697616	5.10133	2.72901	0.0089062	0.110416
Slc6a6	6	91684053	91759067	+	Slc6a6	protein_coding	0.355282	7.57163	2.72844	0.00891961	0.110502
Srsf5	12	80945504	80950508	+	Srsf5	protein_coding	0.274877	6.85548	2.72728	0.00894663	0.11074
Ica1	6	8630527	8778489	-	Ica1	protein_coding	0.311945	5.25024	2.72593	0.00897813	0.11074
Ovgp1	3	105973711	105987424	+	Ovgp1	protein_coding	0.537967	2.84205	2.72587	0.00897946	0.11074
Zswim4	8	84210678	84237056	-	Zswim4	protein_coding	0.467821	4.54782	2.7253	0.00899301	0.11074
Dot1l	10	80755206	80795462	+	Dot1l	protein_coding	0.565958	5.30277	2.72487	0.00900304	0.11074
Sart3	5	113742446	113772511	-	Sart3	protein_coding	0.345728	5.19513	2.72459	0.00900951	0.11074
Acr	15	89568326	89574586	+	Acr	protein_coding	0.447394	1.29636	2.72408	0.00902149	0.11074
Skiv2l	17	34839228	34850211	-	Skiv2l	protein_coding	0.311848	5.28598	2.72406	0.00902203	0.11074
Plppr2	9	21937033	21948908	+	Plppr2	protein_coding	0.433359	6.96375	2.72395	0.00902456	0.11074
Znfx1	2	167035793	167063016	-	Znfx1	protein_coding	0.38727	6.54969	2.72371	0.00903021	0.11074
Pts	9	50521617	50528725	-	Pts	protein_coding	-0.432298	4.49455	-2.72337	0.00903834	0.11074
Syn1	X	20860511	20921005	-	Syn1	protein_coding	0.557232	9.4316	2.72331	0.00903973	0.11074
Vapb	2	173737511	173784337	+	Vapb	protein_coding	-0.140924	7.62667	-2.72325	0.00904106	0.11074
Fbxl14	6	119479668	119482631	+	Fbxl14	protein_coding	0.283942	4.96554	2.72308	0.00904501	0.11074
6330549D23Rik	3	96606659	96629821	-	6330549D23Rik	transcribed_processed_pseudogene	-0.307654	3.09363	-2.72303	0.00904641	0.11074
Glt8d2	10	82650433	82690651	-	Glt8d2	protein_coding	-0.418303	4.33963	-2.72278	0.00905225	0.11074
Arsb	13	93771630	93943017	+	Arsb	protein_coding	0.233434	7.39455	2.72271	0.00905393	0.11074
Pkmyt1	17	23726336	23736736	+	Pkmyt1	protein_coding	0.492654	2.27085	2.72223	0.00906514	0.11074
Calcrl	2	84330626	84425412	-	Calcrl	protein_coding	-0.441029	2.7299	-2.72221	0.00906561	0.11074
Trim41	11	48806404	48817354	-	Trim41	protein_coding	0.204638	5.99036	2.72205	0.00906948	0.11074
Gcn1l1	5	115565254	115622655	+	Gcn1l1	protein_coding	0.42236	5.43108	2.72174	0.00907683	0.11075
Csrnp1	9	119971163	119984659	-	Csrnp1	protein_coding	0.534824	3.36053	2.72121	0.00908943	0.110796
Chd4	6	125095981	125130592	+	Chd4	protein_coding	0.246875	7.15465	2.72089	0.00909687	0.110796
Lrrn2	1	132880273	132940006	+	Lrrn2	protein_coding	0.341584	7.07181	2.72075	0.00910013	0.110796
Dact1	12	71309884	71320108	+	Dact1	protein_coding	0.482601	2.62727	2.72015	0.00911452	0.110891
Acd	8	105695860	105701103	-	Acd	protein_coding	0.387402	4.62012	2.7196	0.00912758	0.110924
Tmem151a	19	5070859	5085532	-	Tmem151a	protein_coding	0.373867	8.15133	2.7192	0.00913706	0.110924
Jkamp	12	72085589	72101462	+	Jkamp	protein_coding	-0.238026	5.72015	-2.71905	0.00914063	0.110924
Ebf4	2	130295169	130370482	+	Ebf4	protein_coding	0.536986	2.39378	2.71847	0.00915436	0.110924
Extl1	4	134356372	134383851	-	Extl1	protein_coding	0.276119	6.37003	2.71775	0.00917164	0.110924
Zcchc14	8	121598703	121652902	-	Zcchc14	protein_coding	0.327893	6.37946	2.71741	0.00917984	0.110924
Pde4a	9	21165714	21213249	+	Pde4a	protein_coding	0.395546	7.1894	2.71738	0.00918048	0.110924
Trim28	7	12999114	13031036	+	Trim28	protein_coding	0.267778	6.45301	2.71716	0.00918566	0.110924
Stac3	10	127501686	127508824	+	Stac3	protein_coding	0.280752	0.900876	2.71714	0.00918611	0.110924
Rtn4rl2	2	84871924	84886711	-	Rtn4rl2	protein_coding	0.654693	3.66446	2.71637	0.00920456	0.110924
Ostf1	19	18579328	18631790	-	Ostf1	protein_coding	-0.309362	3.11604	-2.71611	0.0092108	0.110924
Tspan3	9	56131725	56165478	-	Tspan3	protein_coding	-0.218872	8.60789	-2.71588	0.00921629	0.110924
Gbp10	5	105215699	105239534	-	Gbp10	protein_coding	-0.388147	0.8657	-2.71574	0.00921982	0.110924
Ccdc92b	11	74619605	74641517	+	Ccdc92b	protein_coding	0.360446	5.81149	2.71533	0.0092297	0.110924
Cnot9	1	74506058	74530843	+	Cnot9	protein_coding	0.230319	5.24163	2.71515	0.00923404	0.110924
Zfp687	3	95006590	95015449	-	Zfp687	protein_coding	0.366593	5.0931	2.71486	0.00924099	0.110924
Cpsf4	5	145167213	145182042	+	Cpsf4	protein_coding	0.466891	3.91399	2.71414	0.00925831	0.110924
Xylt2	11	94663851	94677516	-	Xylt2	protein_coding	0.303476	4.63288	2.71404	0.0092606	0.110924
Peg13	15	72805600	72810325	-	Peg13	sense_intronic	0.277489	9.14463	2.71391	0.00926385	0.110924
Vmn2r86	10	130441562	130456051	-	Vmn2r86	protein_coding	0.324002	0.834014	2.71382	0.00926596	0.110924
Ptch2	4	117096075	117116102	+	Ptch2	protein_coding	0.492394	1.32698	2.71354	0.00927276	0.110924
Ldha	7	46841475	46855628	+	Ldha	protein_coding	-0.265805	7.87078	-2.71333	0.00927776	0.110924
1500015A07Rik	18	61726390	61735918	+	1500015A07Rik	antisense	0.364304	2.56424	2.71316	0.00928198	0.110924
Tecpr1	5	144194442	144223616	-	Tecpr1	protein_coding	0.301165	6.28583	2.71289	0.00928841	0.110924
Kdelc2	9	53384025	53401868	+	Kdelc2	protein_coding	-0.249876	3.69988	-2.71277	0.00929127	0.110924
Nup214	2	31974436	32053976	+	Nup214	protein_coding	0.392046	5.30201	2.71277	0.00929132	0.110924
Cd247	1	165788681	165877278	+	Cd247	protein_coding	0.395017	0.355539	2.71246	0.00929884	0.110924
Nsun7	5	66259897	66298027	+	Nsun7	protein_coding	0.43538	3.06472	2.7124	0.00930034	0.110924
Safb2	17	56560965	56584586	-	Safb2	protein_coding	0.401624	5.01067	2.71108	0.00933235	0.111168
Tubb6	18	67390717	67402749	+	Tubb6	protein_coding	0.341512	2.67687	2.71082	0.00933859	0.111168
Tmf1	6	97152997	97179123	-	Tmf1	protein_coding	-0.306894	5.37717	-2.71052	0.00934593	0.111168
Sf3a2	10	80798198	80804925	+	Sf3a2	protein_coding	0.571157	4.18969	2.71047	0.00934703	0.111168
Slc25a25	2	32414487	32451446	-	Slc25a25	protein_coding	0.30789	5.94939	2.71	0.00935837	0.111172
Lrp1	10	127538161	127621149	-	Lrp1	protein_coding	0.366283	8.18614	2.7098	0.00936325	0.111172
Gtf3c1	7	125640954	125707781	-	Gtf3c1	protein_coding	0.360731	6.91508	2.70938	0.00937358	0.111172
Nono	X	101429318	101448592	+	Nono	protein_coding	0.181238	6.58006	2.70888	0.00938573	0.111172
Dpy19l1	9	24411776	24503141	-	Dpy19l1	protein_coding	-0.267675	6.9156	-2.70882	0.00938736	0.111172
Bcas3	11	85353167	85826059	+	Bcas3	protein_coding	0.287009	5.35231	2.70856	0.0093937	0.111172
As3mt	19	46707443	46741096	+	As3mt	protein_coding	-0.305275	3.7407	-2.70838	0.009398	0.111172
Rnf169	7	99920254	99980449	-	Rnf169	protein_coding	0.403586	6.07815	2.70831	0.00939976	0.111172
Ppm1m	9	106194947	106199747	-	Ppm1m	protein_coding	0.276567	3.78347	2.70801	0.00940704	0.11118
Bmp1	14	70474558	70520235	-	Bmp1	protein_coding	0.439759	5.76114	2.70664	0.0094407	0.111343
Armcx4	X	134686519	134696758	+	Armcx4	protein_coding	0.378813	6.58843	2.7065	0.00944407	0.111343
Wwp1	4	19608303	19708994	-	Wwp1	protein_coding	-0.257695	5.93883	-2.70629	0.00944915	0.111343
Os9	10	127095650	127121132	-	Os9	protein_coding	0.222452	6.97703	2.70603	0.00945546	0.111343
Raver2	4	101068983	101152371	+	Raver2	protein_coding	0.204084	4.69587	2.70565	0.00946498	0.111343
0610040J01Rik	5	63812363	63899626	+	0610040J01Rik	protein_coding	-0.312294	2.99301	-2.70562	0.00946564	0.111343
Fosb	7	19302696	19310052	-	Fosb	protein_coding	0.56008	3.77109	2.70554	0.0094676	0.111343
Adamts13	2	26973416	27009629	+	Adamts13	protein_coding	-0.36717	1.30354	-2.70523	0.00947524	0.111343
Lrrtm2	18	35209011	35215025	-	Lrrtm2	protein_coding	-0.337427	7.11106	-2.70504	0.0094799	0.111343
Wbp11	6	136813654	136828234	-	Wbp11	protein_coding	0.273449	6.22479	2.70471	0.00948807	0.111362
Plekhm1	11	103364275	103412688	-	Plekhm1	protein_coding	0.396887	5.22506	2.70393	0.00950732	0.111454
Mn1	5	111417362	111457034	+	Mn1	protein_coding	0.474485	5.39786	2.70386	0.00950907	0.111454
Hsd17b7	1	169949535	169969242	-	Hsd17b7	protein_coding	-0.244861	5.05915	-2.70343	0.00951966	0.111501
Naca	10	128035575	128048638	+	Naca	protein_coding	-0.362682	5.78223	-2.70306	0.00952869	0.111515
Ttll7	3	146852367	146984010	+	Ttll7	protein_coding	-0.227092	8.59756	-2.70285	0.00953398	0.111515
Xpo6	7	126101715	126200502	-	Xpo6	protein_coding	0.363635	6.09683	2.70258	0.00954074	0.111516
9430021M05Rik	2	162661163	162667110	+	9430021M05Rik	processed_transcript	0.321603	3.51295	2.70232	0.00954723	0.111516
Smarca4	9	21616169	21704231	+	Smarca4	protein_coding	0.327535	6.91195	2.70164	0.00956399	0.111579
Lhfpl4	6	113168090	113195385	-	Lhfpl4	protein_coding	0.33523	7.33008	2.70146	0.00956839	0.111579
Atn1	6	124742544	124756525	-	Atn1	protein_coding	0.693981	7.30171	2.7013	0.00957235	0.111579
Thrsp	7	97412938	97417731	-	Thrsp	protein_coding	-0.399613	4.65404	-2.7008	0.00958499	0.111594
Itgb3	11	104608000	104670477	+	Itgb3	protein_coding	0.385075	2.85545	2.70054	0.00959135	0.111594
Agpat5	8	18846277	18891362	+	Agpat5	protein_coding	-0.263408	5.64032	-2.70046	0.0095934	0.111594
Inpp5j	11	3494375	3504822	-	Inpp5j	protein_coding	0.367027	5.71807	2.69983	0.00960907	0.111598
Commd6	14	101632981	101640687	-	Commd6	protein_coding	-0.281181	4.64855	-2.69953	0.00961643	0.111598
Abcf1	17	35956819	35969762	-	Abcf1	protein_coding	0.165731	6.20228	2.69913	0.00962639	0.111598
Rassf4	6	116633008	116673953	-	Rassf4	protein_coding	0.35428	3.83969	2.69912	0.00962668	0.111598
Rcor3	1	192098546	192138063	-	Rcor3	protein_coding	0.31119	4.12097	2.69893	0.00963141	0.111598
Naa40	19	7225668	7241223	-	Naa40	protein_coding	0.361331	5.25363	2.69886	0.00963318	0.111598
Nt5dc3	10	86779005	86838390	+	Nt5dc3	protein_coding	0.313774	7.15839	2.69851	0.00964205	0.111624
Zfp956	6	47953390	47965301	+	Zfp956	protein_coding	0.232714	4.68385	2.69787	0.009658	0.111731
Cwc27	13	104631140	104817143	-	Cwc27	protein_coding	0.274847	3.80816	2.69761	0.00966451	0.111731
Cmya5	13	93040713	93144725	-	Cmya5	protein_coding	0.597863	3.77827	2.69706	0.00967828	0.111749
Cacna1c	6	118587240	119196419	-	Cacna1c	protein_coding	0.589235	6.30903	2.697	0.00967983	0.111749
Zfyve27	19	42163951	42194591	+	Zfyve27	protein_coding	0.255366	6.24152	2.69676	0.00968581	0.111749
Dennd2a	6	39462378	39557868	-	Dennd2a	protein_coding	0.236401	4.57971	2.6959	0.00970742	0.111756
Ubr2	17	46928295	47010557	-	Ubr2	protein_coding	0.302198	6.37535	2.69585	0.00970882	0.111756
B3galt5	16	96235801	96319860	+	B3galt5	protein_coding	0.353608	6.0916	2.69583	0.00970913	0.111756
Chm	X	113040593	113185518	-	Chm	protein_coding	-0.322289	6.20409	-2.69568	0.00971312	0.111756
Dopey2	16	93711904	93810591	+	Dopey2	protein_coding	0.444311	6.04572	2.69543	0.00971935	0.111756
Chml	1	175682237	175692902	-	Chml	protein_coding	-0.29488	4.2884	-2.69488	0.00973307	0.111838
Kif21b	1	136131389	136177999	+	Kif21b	protein_coding	0.65441	6.59342	2.69445	0.00974397	0.111847
Cacnb1	11	98001508	98023035	-	Cacnb1	protein_coding	0.413461	6.91585	2.69425	0.00974903	0.111847
Dars	1	128363707	128417369	-	Dars	protein_coding	-0.32302	5.39467	-2.6939	0.00975804	0.111847
Phkg1	5	129863421	129898550	-	Phkg1	protein_coding	-0.31139	4.00282	-2.69381	0.00976027	0.111847
Ankrd11	8	122883822	123042278	-	Ankrd11	protein_coding	0.545525	7.29875	2.6934	0.00977049	0.11188
Kcnh4	11	100740376	100759943	-	Kcnh4	protein_coding	0.619871	4.4269	2.69311	0.00977798	0.11188
Cadm2	16	66655421	67620909	-	Cadm2	protein_coding	-0.316793	8.63049	-2.6927	0.00978841	0.11188
Wbp2	11	116078573	116086996	-	Wbp2	protein_coding	0.309185	8.75267	2.69237	0.00979671	0.11188
Blzf1	1	164289800	164307490	-	Blzf1	protein_coding	-0.243205	4.5294	-2.69227	0.00979927	0.11188
Rpl38	11	114668524	114672332	+	Rpl38	protein_coding	-0.334683	3.12782	-2.69194	0.00980757	0.11188
2010001A14Rik	11	57795499	57801418	-	2010001A14Rik	processed_transcript	-0.513106	2.17888	-2.69174	0.00981279	0.11188
Crebbp	16	4081328	4213998	-	Crebbp	protein_coding	0.548636	5.57844	2.69087	0.00983496	0.11188
Hlcs	16	94128882	94313572	-	Hlcs	protein_coding	0.288899	4.2369	2.69062	0.0098412	0.11188
Mlc1	15	88955884	88979008	-	Mlc1	protein_coding	-0.201547	7.39199	-2.69027	0.00985007	0.11188
Zc3h18	8	122376609	122417361	+	Zc3h18	protein_coding	0.291545	4.71433	2.69021	0.00985177	0.11188
Spef2	15	9578193	9748869	-	Spef2	protein_coding	0.431429	1.25449	2.69016	0.00985286	0.11188
Adamtsl4	3	95676201	95687918	-	Adamtsl4	protein_coding	0.482568	3.04566	2.68992	0.00985904	0.11188
A130010J15Rik	1	193168046	193177833	+	A130010J15Rik	protein_coding	-0.379353	2.90624	-2.68985	0.00986097	0.11188
Celf1	2	90940382	91019498	+	Celf1	protein_coding	0.289013	7.62814	2.6898	0.0098621	0.11188
Stmn2	3	8509360	8561607	+	Stmn2	protein_coding	-0.207826	9.04227	-2.68931	0.00987455	0.111947
Lsm6	8	78804865	78821141	-	Lsm6	protein_coding	-0.288402	4.9593	-2.68868	0.0098909	0.111951
Csrnp2	15	100479570	100495489	-	Csrnp2	protein_coding	0.210173	5.29025	2.68821	0.00990272	0.111951
Pask	1	93308770	93343483	-	Pask	protein_coding	0.35319	2.24309	2.68812	0.00990515	0.111951
Mmd2	5	142562358	142608801	-	Mmd2	protein_coding	-0.274244	7.47523	-2.68772	0.00991546	0.111951
Crtc2	3	90254163	90264126	+	Crtc2	protein_coding	0.408069	4.24435	2.68689	0.00993683	0.111951
C330007P06Rik	X	36823737	36874112	-	C330007P06Rik	protein_coding	-0.220556	5.87865	-2.68665	0.00994299	0.111951
Cnn1	9	22099216	22109631	+	Cnn1	protein_coding	-0.322069	0.544307	-2.68649	0.00994706	0.111951
Prune2	19	16956118	17223933	+	Prune2	protein_coding	0.224439	6.8633	2.68641	0.00994894	0.111951
Jakmip2	18	43531408	43687774	-	Jakmip2	protein_coding	0.170664	5.74961	2.68602	0.00995911	0.111951
Pml	9	58218076	58249787	-	Pml	protein_coding	0.344987	4.11228	2.686	0.00995972	0.111951
Abhd3	18	10644411	10706772	-	Abhd3	protein_coding	-0.274014	5.78919	-2.68593	0.00996138	0.111951
Kazald1	19	45075241	45079290	+	Kazald1	protein_coding	-0.553866	2.54812	-2.68592	0.00996165	0.111951
Ssh1	5	113937094	113993895	-	Ssh1	protein_coding	0.356713	3.68608	2.68581	0.00996453	0.111951
Il6	5	30013114	30019982	+	Il6	protein_coding	-0.244254	0.164816	-2.68568	0.00996784	0.111951
Lclat1	17	73107985	73243369	+	Lclat1	protein_coding	0.253726	5.88926	2.68544	0.00997395	0.111951
Rrp1	10	78400384	78413044	-	Rrp1	protein_coding	0.155078	8.1981	2.68434	0.0100025	0.112197
Slc4a3	1	75546266	75562173	+	Slc4a3	protein_coding	0.375041	6.45338	2.68374	0.010018	0.112236
Layn	9	51054640	51077095	-	Layn	protein_coding	-0.606104	2.39793	-2.68369	0.0100192	0.112236
Csnk1a1	18	61555274	61590062	+	Csnk1a1	protein_coding	-0.271021	7.64077	-2.68316	0.010033	0.112273
Zfp280b	10	76032650	76043235	+	Zfp280b	protein_coding	0.314185	4.73315	2.68295	0.0100385	0.112273
Gsto2	19	47865545	47886325	+	Gsto2	protein_coding	0.288011	0.772398	2.68276	0.0100434	0.112273
Zmynd11	13	9684833	9765331	-	Zmynd11	protein_coding	0.203303	7.36979	2.68232	0.0100548	0.112273
4930520O04Rik	9	114368303	114377230	+	4930520O04Rik	processed_transcript	-0.276204	0.886629	-2.68229	0.0100556	0.112273
Tbc1d9	8	83165352	83272935	+	Tbc1d9	protein_coding	0.236508	7.13268	2.68132	0.0100809	0.112437
Ccdc91	6	147475828	147632613	+	Ccdc91	protein_coding	-0.200805	5.61375	-2.68103	0.0100885	0.112437
Pcdhb16	18	37477814	37483039	+	Pcdhb16	protein_coding	0.564715	3.43571	2.68096	0.0100902	0.112437
Psd3	8	67689082	68212028	-	Psd3	protein_coding	-0.351598	9.63895	-2.6803	0.0101075	0.112477
BC048507	13	67863326	67863926	+	BC048507	protein_coding	-0.334786	3.4865	-2.67977	0.0101214	0.112477
Kbtbd3	9	4309833	4331733	+	Kbtbd3	protein_coding	-0.370091	3.36437	-2.67974	0.0101223	0.112477
Trrap	5	144767732	144859779	+	Trrap	protein_coding	0.525064	6.66771	2.67959	0.0101262	0.112477
Uqcc2	17	27122663	27133917	-	Uqcc2	protein_coding	-0.545766	4.58064	-2.67934	0.0101326	0.112477
Tmed7	18	46560235	46597536	-	Tmed7	protein_coding	-0.333412	7.38397	-2.6793	0.0101336	0.112477
43715	9	25252439	25308572	+	43715	protein_coding	-0.293839	8.73848	-2.67877	0.0101476	0.112546
Supt6	11	78206746	78245988	-	Supt6	protein_coding	0.351401	7.24458	2.67848	0.0101552	0.112546
C1qtnf2	11	43474276	43491526	+	C1qtnf2	protein_coding	-0.362532	0.84255	-2.67831	0.0101596	0.112546
Chl1	6	103510586	103750212	+	Chl1	protein_coding	-0.337576	7.45588	-2.67768	0.0101762	0.112656
Rheb	5	24802823	24842625	-	Rheb	protein_coding	-0.273881	6.37237	-2.67728	0.0101868	0.112667
Nsmce2	15	59374247	59601685	+	Nsmce2	protein_coding	-0.268159	4.51127	-2.67713	0.0101906	0.112667
Nat8	6	85830388	85832083	-	Nat8	protein_coding	-0.294674	1.38003	-2.67602	0.01022	0.112779
Gpat2	2	127425199	127436093	+	Gpat2	protein_coding	0.21301	0.387233	2.67585	0.0102244	0.112779
Wipf2	11	98863638	98905041	+	Wipf2	protein_coding	0.309729	7.08196	2.6757	0.0102283	0.112779
Tsr2	X	151087094	151096544	-	Tsr2	protein_coding	-0.220171	6.68973	-2.67552	0.010233	0.112779
Clstn1	4	149586468	149648900	+	Clstn1	protein_coding	0.257501	10.5564	2.67491	0.0102491	0.112779
Taok2	7	126865678	126884704	-	Taok2	protein_coding	0.278243	6.74919	2.67487	0.0102503	0.112779
Ap2a1	7	44900373	44929497	-	Ap2a1	protein_coding	0.408941	6.68375	2.67476	0.0102533	0.112779
Dmtn	14	70601263	70636049	-	Dmtn	protein_coding	0.233731	8.41864	2.67468	0.0102554	0.112779
Slc6a9	4	117834506	117875199	+	Slc6a9	protein_coding	0.363699	5.39706	2.67448	0.0102605	0.112779
Smurf1	5	144876495	144965848	-	Smurf1	protein_coding	0.391111	5.76136	2.67358	0.0102844	0.112946
Map3k7cl	16	87553330	87595337	+	Map3k7cl	protein_coding	-0.285172	0.503386	-2.67341	0.010289	0.112946
Rpl9	5	65388364	65391445	-	Rpl9	protein_coding	-0.46023	4.00259	-2.67302	0.0102993	0.112957
Edc4	8	105880881	105894909	+	Edc4	protein_coding	0.250766	5.71792	2.67287	0.0103034	0.112957
Rps27a	11	29545846	29548110	-	Rps27a	protein_coding	-0.443867	4.8495	-2.67231	0.0103181	0.113039
Incenp	19	9872297	9899534	-	Incenp	protein_coding	0.249473	4.34536	2.67188	0.0103296	0.113039
Ace	11	105967945	105989965	+	Ace	protein_coding	0.406688	4.0099	2.6717	0.0103346	0.113039
Irs1	1	82233101	82291417	-	Irs1	protein_coding	0.503079	4.19626	2.67159	0.0103375	0.113039
Tbrg4	11	6615598	6626068	-	Tbrg4	protein_coding	0.270196	4.58688	2.67027	0.0103725	0.113223
Trak2	1	58900449	58973431	-	Trak2	protein_coding	-0.178735	8.18172	-2.67026	0.0103728	0.113223
Cpe	8	64592542	64693055	-	Cpe	protein_coding	-0.171059	11.0959	-2.6697	0.0103879	0.113223
St7l	3	104864005	104930065	+	St7l	protein_coding	-0.322189	4.25156	-2.6697	0.010388	0.113223
Sox12	2	152393611	152398064	-	Sox12	protein_coding	0.578228	4.66643	2.66969	0.0103881	0.113223
Lgi2	5	52533517	52566463	-	Lgi2	protein_coding	0.281019	7.11721	2.66946	0.0103943	0.113223
Scn10a	9	119608456	119719323	-	Scn10a	protein_coding	0.347999	0.617653	2.66889	0.0104095	0.113292
Fbxl20	11	98082556	98150404	-	Fbxl20	protein_coding	0.300013	6.26915	2.66841	0.0104224	0.113292
Nova2	7	18925888	18965320	+	Nova2	protein_coding	0.651022	6.44965	2.66825	0.0104267	0.113292
Itpripl2	7	118485111	118491976	-	Itpripl2	protein_coding	-0.468504	3.14751	-2.66795	0.0104348	0.113292
Ski	4	155154075	155222593	-	Ski	protein_coding	0.358312	7.48425	2.66769	0.0104417	0.113292
Atp6v0a1	11	101009452	101063720	+	Atp6v0a1	protein_coding	0.508852	8.61278	2.66747	0.0104477	0.113292
Vps52	17	33955812	33966985	+	Vps52	protein_coding	0.254263	5.83579	2.6673	0.0104525	0.113292
Gfer	17	24693191	24696157	-	Gfer	protein_coding	-0.325619	4.3351	-2.66702	0.01046	0.113292
Prrc2a	17	35149076	35164898	-	Prrc2a	protein_coding	0.620837	8.00869	2.66699	0.0104608	0.113292
Rnpepl1	1	92910783	92924385	+	Rnpepl1	protein_coding	0.397498	4.29108	2.66619	0.0104824	0.113453
Gtf2ird2	5	134184019	134224356	+	Gtf2ird2	protein_coding	0.317669	4.25362	2.66567	0.0104965	0.113479
Noc2l	4	156236010	156247617	+	Noc2l	protein_coding	0.221554	5.96607	2.6652	0.010509	0.113479
Uros	7	133686243	133710073	-	Uros	protein_coding	-0.254203	4.22377	-2.66481	0.0105196	0.113479
Cacng8	7	3390683	3415649	+	Cacng8	protein_coding	0.368782	4.51335	2.66479	0.0105203	0.113479
Kctd14	7	97451323	97459558	+	Kctd14	protein_coding	-0.435854	2.46805	-2.66469	0.0105229	0.113479
Slc32a1	2	158610767	158615749	+	Slc32a1	protein_coding	0.545702	6.60043	2.66421	0.010536	0.113479
Smim15	13	108044446	108049173	+	Smim15	protein_coding	-0.313582	5.77885	-2.66364	0.0105514	0.113479
Slc29a2	19	5024006	5031972	+	Slc29a2	protein_coding	0.278556	3.83002	2.66353	0.0105544	0.113479
Snhg14	7	59307924	59975760	-	Snhg14	processed_transcript	-0.528859	4.04622	-2.66284	0.0105732	0.113479
Arid1b	17	4994332	5347657	+	Arid1b	protein_coding	0.210378	6.5009	2.66253	0.0105817	0.113479
Irs2	8	10984681	11008459	-	Irs2	protein_coding	0.537514	5.02644	2.66222	0.0105902	0.113479
Fbxl18	5	142866946	142895422	-	Fbxl18	protein_coding	0.491885	3.94927	2.662	0.010596	0.113479
Rubcn	16	32821703	32877767	-	Rubcn	protein_coding	0.286118	6.47748	2.6617	0.0106042	0.113479
Zfp703	8	26977325	26981462	+	Zfp703	protein_coding	0.377857	5.05387	2.66127	0.010616	0.113479
Pantr1	1	42590782	42694843	-	Pantr1	lincRNA	0.390114	5.21188	2.66112	0.0106201	0.113479
Wdfy1	1	79702262	79776144	-	Wdfy1	protein_coding	-0.248704	5.68083	-2.6608	0.0106289	0.113479
Ppm1g	5	31202664	31220688	-	Ppm1g	protein_coding	0.226496	6.19486	2.66079	0.010629	0.113479
Ephb6	6	41605482	41620510	+	Ephb6	protein_coding	0.418436	6.88934	2.65998	0.0106513	0.113479
Tenm4	7	96171246	96911094	+	Tenm4	protein_coding	0.47479	7.23848	2.65991	0.0106531	0.113479
Cacna1h	17	25374285	25433784	-	Cacna1h	protein_coding	0.581619	5.29256	2.65963	0.0106609	0.113479
Tefm	11	80136678	80142176	-	Tefm	protein_coding	-0.431842	2.55519	-2.65947	0.0106654	0.113479
Snhg6	1	9941959	9944119	-	Snhg6	lincRNA	-0.438481	2.208	-2.65897	0.0106789	0.113479
Las1l	X	95935335	95956963	-	Las1l	protein_coding	0.246525	5.43023	2.65879	0.0106841	0.113479
Angptl7	4	148495183	148500461	-	Angptl7	protein_coding	0.322829	0.596724	2.65872	0.010686	0.113479
Prrc2b	2	32151082	32234538	+	Prrc2b	protein_coding	0.418949	9.05507	2.65865	0.0106879	0.113479
Emc4	2	112363011	112368028	-	Emc4	protein_coding	-0.276124	6.54297	-2.65859	0.0106895	0.113479
Vwa5b2	16	20589471	20605378	+	Vwa5b2	protein_coding	0.480043	5.29547	2.65824	0.0106991	0.113479
Ccdc120	X	7731714	7750906	-	Ccdc120	protein_coding	0.478696	3.51256	2.65793	0.0107075	0.113479
Ankrd63	2	118699103	118703964	-	Ankrd63	protein_coding	0.572342	5.8068	2.65778	0.0107117	0.113479
Vps33a	5	123528659	123573039	-	Vps33a	protein_coding	0.202008	7.31119	2.65766	0.0107152	0.113479
Usp19	9	108490602	108502338	+	Usp19	protein_coding	0.353386	6.08279	2.65765	0.0107153	0.113479
Hirip3	7	126861972	126865378	+	Hirip3	protein_coding	0.303475	4.76391	2.65758	0.0107173	0.113479
Tm2d1	4	98355370	98383307	-	Tm2d1	protein_coding	-0.410037	2.92438	-2.65757	0.0107175	0.113479
Myh10	11	68691559	68816633	+	Myh10	protein_coding	0.445096	7.93903	2.65755	0.0107181	0.113479
9330199G10Rik	13	19462847	19504368	-	9330199G10Rik	lincRNA	0.31084	0.841616	2.65752	0.010719	0.113479
Sptb	12	76580488	76710548	-	Sptb	protein_coding	0.504403	7.59417	2.65666	0.0107426	0.113658
Trim62	4	128883580	128911329	+	Trim62	protein_coding	0.43157	4.87583	2.65621	0.010755	0.113669
Ormdl1	1	53297095	53310310	+	Ormdl1	protein_coding	-0.284099	3.74919	-2.65577	0.0107674	0.113669
Oplah	15	76296601	76328016	-	Oplah	protein_coding	0.392916	4.00556	2.65573	0.0107685	0.113669
Ddr1	17	35681567	35704622	-	Ddr1	protein_coding	0.426864	5.61489	2.65566	0.0107704	0.113669
Olfr544	7	102482031	102488314	-	Olfr544	protein_coding	0.117421	0.116411	2.65478	0.0107946	0.113842
Capn5	7	98121559	98178275	-	Capn5	protein_coding	0.31109	6.14838	2.65458	0.0108002	0.113842
Sema3c	5	17574281	17730269	+	Sema3c	protein_coding	-0.344787	5.03322	-2.65431	0.0108078	0.113851
Them4	3	94310089	94332541	+	Them4	protein_coding	-0.29536	4.70928	-2.65382	0.0108215	0.113924
Gtf2ird1	5	134357656	134456717	-	Gtf2ird1	protein_coding	0.304592	3.96866	2.65258	0.010856	0.113981
A430035B10Rik	6	8488795	8510431	-	A430035B10Rik	processed_transcript	-0.427429	2.14367	-2.65241	0.0108607	0.113981
Dbi	1	120113280	120121079	-	Dbi	protein_coding	-0.316328	6.04429	-2.6519	0.0108748	0.113981
Ppp1cb	5	32458843	32517434	+	Ppp1cb	protein_coding	-0.311027	8.64599	-2.65136	0.01089	0.113981
Mkl2	16	13256481	13417530	+	Mkl2	protein_coding	0.370295	8.53073	2.65106	0.0108983	0.113981
Celsr3	9	108826320	108852970	+	Celsr3	protein_coding	0.660119	6.43239	2.6509	0.010903	0.113981
Ighmbp2	19	3260924	3283018	-	Ighmbp2	protein_coding	0.340242	3.5956	2.65083	0.0109047	0.113981
Afap1	5	35893319	36003924	+	Afap1	protein_coding	0.441341	4.59038	2.65068	0.0109091	0.113981
Csnk1g1	9	65908924	66045016	+	Csnk1g1	protein_coding	0.232746	5.62241	2.65053	0.0109133	0.113981
Unc13a	8	71624417	71671758	-	Unc13a	protein_coding	0.39902	8.43871	2.65038	0.0109175	0.113981
Zmym3	X	101404384	101420850	-	Zmym3	protein_coding	0.322915	6.90667	2.65025	0.0109212	0.113981
Rps20	4	3831334	3835666	-	Rps20	protein_coding	-0.423742	5.76901	-2.65015	0.0109239	0.113981
Trhde	10	114398823	114802308	-	Trhde	protein_coding	-0.377513	5.40305	-2.65003	0.0109272	0.113981
Nras	3	103058285	103067915	+	Nras	protein_coding	-0.189363	6.16614	-2.64992	0.0109303	0.113981
Iffo1	6	125145241	125161783	+	Iffo1	protein_coding	0.372243	5.39421	2.64991	0.0109306	0.113981
Fam189a1	7	64756091	65156571	-	Fam189a1	protein_coding	0.438176	6.34	2.64977	0.0109344	0.113981
Med1	11	98152154	98193294	-	Med1	protein_coding	0.320873	5.82045	2.64941	0.0109447	0.114018
Npc1	18	12189693	12236401	-	Npc1	protein_coding	0.218547	6.53901	2.64885	0.0109605	0.114113
Sec16a	2	26409431	26445217	-	Sec16a	protein_coding	0.327562	5.74026	2.64821	0.0109785	0.114148
Nat8l	5	33995984	34005917	+	Nat8l	protein_coding	0.328535	9.01934	2.64806	0.0109825	0.114148
Ndrg2	14	51905271	51914159	-	Ndrg2	protein_coding	-0.254386	9.30348	-2.64743	0.0110003	0.114148
Cox5b	1	36691449	36693682	+	Cox5b	protein_coding	-0.324418	5.41273	-2.64729	0.0110043	0.114148
Kmt2e	5	23434441	23504236	+	Kmt2e	protein_coding	0.311433	6.79961	2.64683	0.0110174	0.114148
Ncoa6	2	155390656	155473895	-	Ncoa6	protein_coding	0.358953	6.68157	2.64677	0.0110191	0.114148
Pkd1	17	24549834	24596509	+	Pkd1	protein_coding	0.663464	6.48158	2.64671	0.0110208	0.114148
Cntn2	1	132509427	132543257	-	Cntn2	protein_coding	0.328721	7.23678	2.64646	0.0110279	0.114148
Shkbp1	7	27342133	27356020	-	Shkbp1	protein_coding	0.4752	2.72096	2.64604	0.0110398	0.114148
Il15	8	82331632	82403223	-	Il15	protein_coding	0.395741	0.756545	2.64555	0.0110537	0.114148
Dock8	19	24999529	25202433	+	Dock8	protein_coding	-0.402121	2.40173	-2.6455	0.0110551	0.114148
Tsc1	2	28641228	28691168	+	Tsc1	protein_coding	0.383135	6.15517	2.64545	0.0110563	0.114148
Ncf4	15	78244801	78262581	+	Ncf4	protein_coding	-0.323786	0.822658	-2.64485	0.0110734	0.114148
Eya3	4	132638987	132724766	+	Eya3	protein_coding	0.358976	4.9608	2.64471	0.0110775	0.114148
Rnf208	2	25242255	25244263	+	Rnf208	protein_coding	0.462495	6.62746	2.64451	0.011083	0.114148
Asah2	19	31984654	32061470	-	Asah2	protein_coding	0.408065	4.34709	2.64431	0.0110889	0.114148
Cox7a2	9	79755361	79759879	-	Cox7a2	protein_coding	-0.404188	6.73062	-2.64418	0.0110926	0.114148
Bahcc1	11	120232947	120292297	+	Bahcc1	protein_coding	0.564185	3.98304	2.64415	0.0110934	0.114148
Gng13	17	25717171	25719407	+	Gng13	protein_coding	-0.501872	4.93712	-2.64398	0.0110982	0.114148
Ano5	7	51511029	51598710	+	Ano5	protein_coding	0.384844	1.36528	2.64348	0.0111124	0.114148
Bcr	10	75060592	75184922	+	Bcr	protein_coding	0.482131	7.26878	2.64332	0.011117	0.114148
Atg10	13	90935356	91223969	-	Atg10	protein_coding	-0.36137	3.45243	-2.64317	0.0111212	0.114148
Fntb	12	76765589	76921413	+	Fntb	protein_coding	0.237902	5.08969	2.64296	0.0111272	0.114148
Zfp516	18	82910879	83005315	+	Zfp516	protein_coding	0.429875	3.96162	2.64285	0.0111305	0.114148
Herc6	6	57581000	57664633	+	Herc6	protein_coding	-0.406809	4.59662	-2.64276	0.0111331	0.114148
Celf5	10	81459227	81482710	-	Celf5	protein_coding	0.373696	7.96532	2.64246	0.0111415	0.114148
C1s2	6	124624625	124636086	-	C1s2	protein_coding	0.156948	0.475878	2.64232	0.0111455	0.114148
Poln	5	34007179	34169449	-	Poln	protein_coding	0.320574	0.768185	2.64176	0.0111615	0.1142
Cmpk2	12	26469204	26479838	+	Cmpk2	protein_coding	-0.241014	5.15452	-2.64167	0.0111642	0.1142
Cnpy4	5	138187485	138193919	+	Cnpy4	protein_coding	0.254808	3.49229	2.64131	0.0111744	0.114236
Rab11fip5	6	85334962	85374635	-	Rab11fip5	protein_coding	0.314249	6.71536	2.64058	0.0111954	0.114382
Prrt3	6	113493639	113501932	-	Prrt3	protein_coding	0.388616	5.34504	2.63969	0.0112211	0.114569
Ndufc1	3	51404677	51408989	-	Ndufc1	protein_coding	-0.42075	4.09633	-2.63943	0.0112283	0.114569
Enox1	14	77156763	77721761	+	Enox1	protein_coding	0.240422	4.78186	2.63903	0.0112399	0.114569
Kif5c	2	49619298	49774779	+	Kif5c	protein_coding	-0.259342	10.3755	-2.63899	0.011241	0.114569
Ap1b1	11	4986824	5042792	+	Ap1b1	protein_coding	0.238815	7.39129	2.63877	0.0112475	0.114569
Ube2v2	16	15552077	15595774	-	Ube2v2	protein_coding	-0.35389	6.17436	-2.63844	0.011257	0.114597
Pygo2	3	89430214	89435129	+	Pygo2	protein_coding	0.281663	5.84336	2.63817	0.0112647	0.114597
Rfng	11	120780746	120784208	-	Rfng	protein_coding	0.379515	6.37224	2.63797	0.0112705	0.114597
Atg12	18	46732417	46741580	-	Atg12	protein_coding	-0.171563	6.77925	-2.63748	0.0112846	0.114671
Baalc	15	38933144	38952913	+	Baalc	protein_coding	-0.199781	8.8631	-2.63677	0.0113051	0.114714
Pwp2	10	78170909	78185150	-	Pwp2	protein_coding	0.270123	4.94831	2.63661	0.0113099	0.114714
Gm38413	5	99730854	99753974	-	Gm38413	lincRNA	0.520115	1.81452	2.63623	0.0113207	0.114714
Acadm	3	153922357	153944633	-	Acadm	protein_coding	-0.258203	4.59705	-2.63594	0.0113292	0.114714
Plekhg3	12	76530891	76580489	+	Plekhg3	protein_coding	0.352328	4.01596	2.63559	0.0113393	0.114714
Pcdhga5	18	37694380	37841874	+	Pcdhga5	protein_coding	0.390826	4.89373	2.63551	0.0113418	0.114714
Zfp867	11	59461197	59472475	-	Zfp867	protein_coding	-0.330227	4.36359	-2.63545	0.0113435	0.114714
Larp1	11	58009064	58062035	+	Larp1	protein_coding	0.326388	6.79419	2.6353	0.0113479	0.114714
Ccdc28a	10	18213676	18234999	-	Ccdc28a	protein_coding	-0.35496	4.573	-2.63524	0.0113497	0.114714
Ino80	2	119373042	119477688	-	Ino80	protein_coding	0.303074	5.15915	2.63369	0.0113947	0.115043
Arx	X	93286445	93298358	+	Arx	protein_coding	0.284258	4.26134	2.63357	0.0113982	0.115043
Sun2	15	79724070	79742537	-	Sun2	protein_coding	0.300295	5.66305	2.63334	0.011405	0.115043
Mical3	6	120931707	121131000	-	Mical3	protein_coding	0.40739	6.6219	2.63318	0.0114097	0.115043
Rhof	5	123103044	123132693	-	Rhof	protein_coding	0.182327	5.88709	2.63295	0.0114161	0.115043
Meg3	12	109541001	109571727	+	Meg3	lincRNA	0.454581	11.2282	2.63252	0.0114287	0.115076
Rpe	1	66700831	66719806	+	Rpe	protein_coding	-0.324445	4.52029	-2.63238	0.011433	0.115076
Rhoc	3	104788375	104794460	+	Rhoc	protein_coding	-0.396197	3.52801	-2.63147	0.0114594	0.115193
Epb41l3	17	69075683	69289990	+	Epb41l3	protein_coding	0.255727	7.70087	2.63101	0.011473	0.115193
Kdm6b	11	69398508	69413676	-	Kdm6b	protein_coding	0.646875	4.00353	2.63064	0.011484	0.115193
Trerf1	17	47140875	47361959	+	Trerf1	processed_transcript	0.51732	4.94012	2.62987	0.0115066	0.115193
Mkrn1	6	39397804	39420463	-	Mkrn1	protein_coding	0.217867	6.56938	2.62978	0.0115091	0.115193
Xiap	X	42059679	42109657	+	Xiap	protein_coding	-0.37199	7.00246	-2.62967	0.0115123	0.115193
Zfp933	4	147822986	147848367	-	Zfp933	protein_coding	-0.340837	4.54511	-2.62961	0.0115141	0.115193
Asb14	14	26894557	26915259	+	Asb14	protein_coding	0.241327	0.543778	2.62946	0.0115185	0.115193
Zfp46	4	136284683	136293943	+	Zfp46	protein_coding	0.346355	5.83278	2.62946	0.0115187	0.115193
Rbm15b	9	106880918	106887429	-	Rbm15b	protein_coding	0.182987	5.7083	2.62913	0.0115283	0.115193
Fabp7	10	57784881	57788451	+	Fabp7	protein_coding	-0.489621	4.10071	-2.62882	0.0115375	0.115193
Arhgef10	8	14911663	15001086	+	Arhgef10	protein_coding	0.363575	5.23632	2.62813	0.0115579	0.115193
Fstl4	11	52764634	53188539	+	Fstl4	protein_coding	0.474037	4.27728	2.62795	0.0115631	0.115193
Myo18b	5	112688876	112896363	-	Myo18b	protein_coding	0.43263	1.64568	2.62789	0.0115649	0.115193
Edc3	9	57708540	57752500	+	Edc3	protein_coding	0.21557	5.21235	2.62734	0.0115812	0.115193
Gps2	11	69913888	69916592	+	Gps2	protein_coding	0.356533	3.51612	2.62709	0.0115886	0.115193
Myct1	10	5593775	5606905	+	Myct1	protein_coding	-0.322426	0.793888	-2.62694	0.011593	0.115193
Ctso	3	81932601	81956726	+	Ctso	protein_coding	-0.316754	5.61213	-2.62654	0.0116048	0.115193
Gm20605	5	137629175	137642900	+	Gm20605	protein_coding	0.703344	3.11652	2.62636	0.0116103	0.115193
Ptp4a1	1	30940302	30949771	-	Ptp4a1	protein_coding	-0.242273	5.67269	-2.62629	0.0116122	0.115193
Kcnd1	X	7822289	7838281	+	Kcnd1	protein_coding	0.296602	4.05392	2.62621	0.0116147	0.115193
Ano8	8	71476019	71485964	-	Ano8	protein_coding	0.513136	4.63753	2.62571	0.0116296	0.115193
Zfp865	7	5020376	5036769	+	Zfp865	protein_coding	0.454244	4.0708	2.62566	0.011631	0.115193
Kcnc4	3	107438303	107459553	-	Kcnc4	protein_coding	0.292856	6.45105	2.62557	0.0116336	0.115193
Cdk5rap1	2	154335380	154373011	-	Cdk5rap1	protein_coding	-0.357561	3.08772	-2.62548	0.0116364	0.115193
Tbc1d10b	7	127197459	127208469	-	Tbc1d10b	protein_coding	0.273613	6.35846	2.62537	0.0116397	0.115193
Rps17	7	81342732	81345255	-	Rps17	protein_coding	-0.354414	4.31404	-2.62531	0.0116413	0.115193
Pex13	11	23646479	23665960	-	Pex13	protein_coding	-0.282052	5.51738	-2.62519	0.011645	0.115193
Eif2ak1	5	143817788	143904252	+	Eif2ak1	protein_coding	0.218459	6.60008	2.62512	0.0116471	0.115193
Mapt	11	104231390	104332091	+	Mapt	protein_coding	0.181396	9.51197	2.62491	0.0116533	0.115193
Klk8	7	43797577	43803827	+	Klk8	protein_coding	-0.408389	1.58613	-2.62485	0.0116552	0.115193
Bag6	17	35135178	35147323	+	Bag6	protein_coding	0.329386	6.61097	2.62415	0.011676	0.115199
Zmiz2	11	6389074	6406159	+	Zmiz2	protein_coding	0.454392	7.68891	2.62408	0.0116779	0.115199
Coa4	7	100537071	100540370	+	Coa4	protein_coding	-0.439606	2.15292	-2.62388	0.011684	0.115199
Ndrg4	8	95676980	95715120	+	Ndrg4	protein_coding	0.185859	10.8582	2.62385	0.0116848	0.115199
Slc35e2	4	155601416	155623341	+	Slc35e2	protein_coding	0.302163	6.10623	2.62351	0.0116951	0.115199
Nab1	1	52457294	52500680	-	Nab1	protein_coding	-0.23484	5.42638	-2.62346	0.0116965	0.115199
Nadk2	15	9071260	9110892	+	Nadk2	protein_coding	-0.272509	5.30392	-2.62316	0.0117055	0.115217
Taf1c	8	119597871	119605223	-	Taf1c	protein_coding	0.406857	3.41748	2.62217	0.0117352	0.115217
Lrp3	7	35200027	35215499	-	Lrp3	protein_coding	0.35418	6.15057	2.62214	0.0117361	0.115217
Plk5	10	80356459	80365490	+	Plk5	protein_coding	0.421314	3.45586	2.62199	0.0117404	0.115217
Mepce	5	137781906	137787656	-	Mepce	protein_coding	0.239916	5.68133	2.6219	0.0117433	0.115217
Mms19	19	41941086	41981158	-	Mms19	protein_coding	0.359675	4.65436	2.62184	0.0117451	0.115217
Dpp6	5	26817203	27727506	+	Dpp6	protein_coding	0.276525	7.9119	2.62181	0.0117459	0.115217
Cyp46a1	12	108334381	108362235	+	Cyp46a1	protein_coding	0.349588	7.36385	2.62104	0.0117689	0.115314
U2af2	7	5062143	5079939	+	U2af2	protein_coding	0.226232	6.05702	2.62087	0.0117741	0.115314
Snapc4	2	26362765	26380654	-	Snapc4	protein_coding	0.412297	4.81154	2.62067	0.0117801	0.115314
Nup50	15	84923411	84942964	+	Nup50	protein_coding	0.184238	5.66621	2.62044	0.0117871	0.115314
Dynlt3	X	9654267	9663004	-	Dynlt3	protein_coding	-0.252922	7.86012	-2.62023	0.0117934	0.115314
Zfp553	7	127233061	127238180	+	Zfp553	protein_coding	0.254724	4.79563	2.62012	0.0117966	0.115314
Rab11b	17	33742484	33760531	-	Rab11b	protein_coding	0.284062	7.16631	2.61931	0.0118211	0.115487
Zfp414	17	33629090	33631780	+	Zfp414	protein_coding	0.393222	4.38994	2.61908	0.0118281	0.115489
Crem	18	3266048	3337749	-	Crem	protein_coding	-0.348593	4.12217	-2.61884	0.0118351	0.115491
F5	1	164151838	164220278	+	F5	protein_coding	0.868512	1.55839	2.61853	0.0118448	0.115519
Tprn	2	25262618	25269886	+	Tprn	protein_coding	0.29053	4.51445	2.61786	0.0118649	0.115612
Spns2	11	72451638	72489905	-	Spns2	protein_coding	0.244803	5.7804	2.61747	0.0118768	0.115612
Dock3	9	106892825	107231910	-	Dock3	protein_coding	0.3826	8.06973	2.61731	0.0118816	0.115612
Pex5	6	124396816	124415068	-	Pex5	protein_coding	0.210876	5.24054	2.61708	0.0118886	0.115612
Slc38a7	8	95835920	95853540	-	Slc38a7	protein_coding	0.298415	4.89128	2.61674	0.0118989	0.115612
Pex19	1	172126755	172136494	+	Pex19	protein_coding	-0.172435	6.58015	-2.61672	0.0118993	0.115612
Tada2b	5	36473670	36484286	-	Tada2b	protein_coding	0.193105	5.39151	2.61647	0.0119071	0.115612
Lrrc57	2	120604238	120609521	-	Lrrc57	protein_coding	-0.368942	5.44067	-2.61641	0.0119089	0.115612
Slc39a3	10	81028538	81037427	-	Slc39a3	protein_coding	0.231667	6.2983	2.61604	0.0119201	0.115634
Disp1	1	183086266	183221523	-	Disp1	protein_coding	0.364173	2.99767	2.61589	0.0119248	0.115634
Clcn7	17	25133391	25162105	+	Clcn7	protein_coding	0.265501	5.36993	2.61561	0.011933	0.115648
Gm40893	12	98523844	98526584	+	Gm40893	antisense	0.1933	0.259239	2.61535	0.0119411	0.11566
Vgf	5	137026392	137033352	+	Vgf	protein_coding	0.375848	6.69263	2.61506	0.0119497	0.115678
Ankrd52	10	128377115	128408705	+	Ankrd52	protein_coding	0.733041	5.82894	2.6145	0.0119669	0.115771
Tmx3	18	90510154	90543268	+	Tmx3	protein_coding	-0.255145	6.64807	-2.61424	0.0119748	0.115771
Filip1	9	79815051	80012852	-	Filip1	protein_coding	0.551763	3.70511	2.61389	0.0119855	0.115771
Mpc1	17	8282904	8297662	+	Mpc1	protein_coding	-0.335463	6.14398	-2.6138	0.0119884	0.115771
Ly6g6e	17	35076902	35078805	+	Ly6g6e	protein_coding	-0.486383	1.83459	-2.61325	0.0120051	0.115771
H2-Q7	17	35439155	35443774	+	H2-Q7	protein_coding	-0.359401	1.21606	-2.61278	0.0120194	0.115771
Pcdhgb1	18	37680233	37841871	+	Pcdhgb1	protein_coding	0.537362	4.18464	2.61275	0.0120203	0.115771
Gm6150	10	9683908	9691907	+	Gm6150	transcribed_processed_pseudogene	0.142721	0.106101	2.61256	0.0120264	0.115771
Lmnb2	10	80901203	80918246	-	Lmnb2	protein_coding	0.309787	4.43158	2.61228	0.0120349	0.115771
Usp22	11	61151785	61175056	-	Usp22	protein_coding	0.186818	8.24364	2.61182	0.012049	0.115771
Plxnb2	15	89155549	89180789	-	Plxnb2	protein_coding	0.366081	5.34148	2.61179	0.0120499	0.115771
Col6a2	10	76595762	76623631	-	Col6a2	protein_coding	0.471428	4.05375	2.61156	0.0120569	0.115771
Mtor	4	148448611	148557684	+	Mtor	protein_coding	0.224244	6.75958	2.61141	0.0120617	0.115771
Ndst2	14	20723730	20734563	-	Ndst2	protein_coding	0.29901	3.91171	2.6112	0.012068	0.115771
Sobp	10	43002500	43174531	-	Sobp	protein_coding	0.285415	6.3794	2.61049	0.01209	0.115771
Serp1	3	58519817	58525893	-	Serp1	protein_coding	-0.322022	6.01824	-2.61004	0.0121037	0.115771
Col24a1	3	145292472	145552012	+	Col24a1	protein_coding	0.612508	2.45063	2.60988	0.0121087	0.115771
Stk36	1	74601445	74636895	+	Stk36	protein_coding	0.445751	2.39364	2.6093	0.0121264	0.115771
Myo5c	9	75232020	75305452	+	Myo5c	protein_coding	0.454897	2.31303	2.60908	0.0121332	0.115771
Fgfr1	8	25513654	25575719	+	Fgfr1	protein_coding	0.320691	5.36658	2.60889	0.0121393	0.115771
Kpna4	3	69067149	69127114	-	Kpna4	protein_coding	-0.249684	6.38363	-2.60843	0.0121535	0.115771
Slc23a2	2	132052496	132145109	-	Slc23a2	protein_coding	0.315709	7.88668	2.60837	0.0121554	0.115771
Cyp2s1	7	25802475	25816914	-	Cyp2s1	protein_coding	0.426232	3.02717	2.6083	0.0121574	0.115771
Olfr318	11	58717197	58724015	-	Olfr318	protein_coding	-0.133728	0.212476	-2.60826	0.0121587	0.115771
Parp3	9	106470322	106476950	-	Parp3	protein_coding	-0.291782	2.44438	-2.60793	0.0121688	0.115771
Ppfia4	1	134296783	134332929	-	Ppfia4	protein_coding	0.354245	5.70128	2.6079	0.0121698	0.115771
Atp8b2	3	89939481	89963509	-	Atp8b2	protein_coding	0.365675	6.1292	2.60786	0.0121711	0.115771
Cdcp1	9	123170824	123216039	-	Cdcp1	protein_coding	0.250882	0.494175	2.60753	0.0121811	0.115771
Trim66	7	109449006	109508135	-	Trim66	protein_coding	0.450618	6.00636	2.60753	0.0121813	0.115771
43528	1	72427112	72536931	-	43528	protein_coding	0.318404	4.9137	2.60736	0.0121867	0.115771
Hgf	5	16553495	16620153	+	Hgf	protein_coding	-0.475149	2.59466	-2.60723	0.0121907	0.115771
Col19a1	1	24261890	24587473	-	Col19a1	protein_coding	0.512283	4.70614	2.60706	0.0121957	0.115771
Lrrc32	7	98489283	98502182	+	Lrrc32	protein_coding	0.450208	2.59548	2.60699	0.0121979	0.115771
Man2c1	9	57130690	57142723	+	Man2c1	protein_coding	0.356416	4.72732	2.60698	0.0121983	0.115771
Eci1	17	24426683	24439317	+	Eci1	protein_coding	-0.330317	3.94782	-2.60698	0.0121983	0.115771
Fbxo10	4	45034247	45084605	-	Fbxo10	protein_coding	0.390535	5.37651	2.60638	0.0122169	0.115825
Corin	5	72300025	72504474	-	Corin	protein_coding	0.321713	0.520979	2.60636	0.0122176	0.115825
Zfand2a	5	139471211	139484550	-	Zfand2a	protein_coding	-0.175379	6.13108	-2.60604	0.0122274	0.115853
Gpm6b	X	166238911	166388989	+	Gpm6b	protein_coding	-0.266156	9.96952	-2.60562	0.0122407	0.115895
Srrt	5	137295704	137307675	-	Srrt	protein_coding	0.333647	5.92368	2.60546	0.0122456	0.115895
Clic5	17	44188584	44280173	+	Clic5	protein_coding	-0.402297	3.80896	-2.60512	0.0122561	0.11593
Pbx2	17	34591266	34597401	+	Pbx2	protein_coding	0.212876	5.68715	2.60443	0.0122776	0.115992
Tarsl2	7	65644898	65692092	+	Tarsl2	protein_coding	-0.266918	5.49422	-2.60429	0.012282	0.115992
Myh15	16	49057486	49199105	+	Myh15	protein_coding	-0.405761	1.46666	-2.60401	0.0122907	0.115992
Harbi1	2	91710852	91721546	+	Harbi1	protein_coding	-0.265602	2.93291	-2.60396	0.0122923	0.115992
Smim14	5	65446844	65537185	-	Smim14	protein_coding	-0.186679	6.99714	-2.60372	0.0123	0.115992
Fzd10	5	128600844	128604094	+	Fzd10	protein_coding	-0.292265	1.2215	-2.60357	0.0123047	0.115992
Rbp4	19	38116620	38125322	-	Rbp4	protein_coding	0.33929	3.87094	2.60336	0.012311	0.115992
Zc3h13	14	75284373	75344427	+	Zc3h13	protein_coding	0.358946	6.02744	2.60273	0.0123309	0.115992
Zfp579	7	4983483	4996159	-	Zfp579	protein_coding	0.42564	3.40982	2.60272	0.0123312	0.115992
Ccnk	12	108179579	108203360	+	Ccnk	protein_coding	0.30564	4.68188	2.60259	0.0123352	0.115992
Lzts1	8	69132669	69184226	-	Lzts1	protein_coding	0.335664	5.83814	2.60239	0.0123414	0.115992
A430078I02Rik	6	86470277	86480831	-	A430078I02Rik	antisense	-0.183374	0.264403	-2.60203	0.0123528	0.115992
Ttc30b	2	75935849	75938586	-	Ttc30b	protein_coding	-0.240958	4.52845	-2.60136	0.0123739	0.115992
Git1	11	77493562	77507787	+	Git1	protein_coding	0.394431	8.21107	2.60088	0.0123891	0.115992
Cc2d1b	4	108619940	108634124	+	Cc2d1b	protein_coding	0.525239	4.1285	2.60028	0.012408	0.115992
Dynlt1c	17	6601671	6609775	+	Dynlt1c	protein_coding	-0.29405	2.5166	-2.60008	0.0124141	0.115992
Efcc1	6	87730869	87755909	+	Efcc1	protein_coding	0.365258	2.74516	2.59965	0.0124279	0.115992
Chd5	4	152338651	152390195	+	Chd5	protein_coding	0.427676	7.64518	2.59958	0.0124301	0.115992
Rnf167	11	70647235	70651422	+	Rnf167	protein_coding	0.239389	6.07026	2.59954	0.0124311	0.115992
Zfp931	2	178067695	178078477	-	Zfp931	protein_coding	-0.474379	3.16165	-2.59925	0.0124403	0.115992
Plbd2	5	120483282	120503626	-	Plbd2	protein_coding	0.367364	6.46455	2.59907	0.012446	0.115992
Kcnn2	18	45268860	45686025	+	Kcnn2	protein_coding	0.269084	4.88836	2.59906	0.0124464	0.115992
Dag1	9	108204634	108263959	-	Dag1	protein_coding	0.234701	6.96676	2.59874	0.0124564	0.115992
Lgalsl	11	20823576	20831057	-	Lgalsl	protein_coding	-0.227264	6.97219	-2.59873	0.0124568	0.115992
Tanc2	11	105589986	105929305	+	Tanc2	protein_coding	0.360848	8.00675	2.59872	0.0124571	0.115992
Mmp24	2	155775342	155818367	+	Mmp24	protein_coding	0.242211	5.76764	2.59867	0.0124587	0.115992
2900041M22Rik	11	117611247	117613858	+	2900041M22Rik	processed_transcript	-0.351127	1.14579	-2.59861	0.0124608	0.115992
Rbfox1	16	5885355	7411527	+	Rbfox1	protein_coding	0.184159	8.69537	2.5981	0.0124768	0.115992
Dnmt3a	12	3806007	3914444	+	Dnmt3a	protein_coding	0.443737	6.26146	2.59801	0.0124795	0.115992
Tyro3	2	119797733	119818105	+	Tyro3	protein_coding	0.235074	7.87154	2.59799	0.0124804	0.115992
Lpar1	4	58435255	58553899	-	Lpar1	protein_coding	-0.346107	5.59859	-2.59795	0.0124814	0.115992
Add1	5	34573664	34632309	+	Add1	protein_coding	0.22606	8.58159	2.59794	0.0124818	0.115992
Ggta1	2	35400179	35463232	-	Ggta1	protein_coding	-0.413883	2.60709	-2.5976	0.0124925	0.115992
Mast3	8	70778117	70805055	-	Mast3	protein_coding	0.35916	7.77631	2.59752	0.0124951	0.115992
Hapln3	7	79115102	79131019	-	Hapln3	protein_coding	-0.335507	0.787522	-2.59728	0.0125026	0.115998
Atp1b2	11	69599736	69605943	-	Atp1b2	protein_coding	0.477403	9.10397	2.59693	0.0125139	0.116001
Fbxl3	14	103080239	103099567	-	Fbxl3	protein_coding	-0.248728	6.91148	-2.59653	0.0125267	0.116001
Cep170b	12	112720455	112746593	+	Cep170b	protein_coding	0.440917	7.22021	2.59636	0.0125319	0.116001
Cycs	6	50562563	50566539	-	Cycs	protein_coding	-0.311721	6.6513	-2.59628	0.0125345	0.116001
Hspb8	5	116408491	116422865	-	Hspb8	protein_coding	-0.385942	4.27698	-2.59617	0.012538	0.116001
Asxl1	2	153345829	153404008	+	Asxl1	protein_coding	0.290351	5.7911	2.59599	0.0125439	0.116001
Sfswap	5	129501221	129571385	+	Sfswap	protein_coding	0.414228	5.1865	2.59473	0.0125839	0.116258
Rfx1	8	84066834	84096993	+	Rfx1	protein_coding	0.629444	3.80604	2.59411	0.0126038	0.116258
Arl1	10	88730858	88744095	+	Arl1	protein_coding	-0.323857	5.80852	-2.59384	0.0126125	0.116258
F2r	13	95601803	95618488	-	F2r	protein_coding	-0.410957	2.867	-2.59356	0.0126213	0.116258
Sidt2	9	45937857	45955259	-	Sidt2	protein_coding	0.28877	6.09306	2.59353	0.0126225	0.116258
Cox4i1	8	120668222	120674208	+	Cox4i1	protein_coding	-0.343673	8.40165	-2.5935	0.0126233	0.116258
Trim63	4	134315120	134329630	+	Trim63	protein_coding	0.116433	0.122571	2.59342	0.0126258	0.116258
Myl6	10	128490860	128494146	-	Myl6	protein_coding	-0.375211	5.94157	-2.5934	0.0126266	0.116258
Scap	9	110333288	110384951	+	Scap	protein_coding	0.253879	6.23419	2.59305	0.0126376	0.11629
Gba2	4	43566928	43578874	-	Gba2	protein_coding	0.305419	6.1531	2.59274	0.0126477	0.11629
Wdr17	8	54629055	54887185	-	Wdr17	protein_coding	-0.355985	4.94769	-2.59264	0.0126507	0.11629
Mrpl57	14	57826234	57829297	+	Mrpl57	protein_coding	-0.259628	4.4079	-2.59213	0.0126673	0.116369
Slc24a3	2	145167754	145642167	+	Slc24a3	protein_coding	0.246256	6.86863	2.59195	0.012673	0.116369
Ebp	X	8185329	8193513	-	Ebp	protein_coding	-0.289792	4.22944	-2.5914	0.0126907	0.116434
Matr3	18	35562146	35593836	+	Matr3	protein_coding	-0.280551	8.90027	-2.5913	0.0126938	0.116434
Vps11	9	44347749	44361671	-	Vps11	protein_coding	0.199286	6.24836	2.59098	0.0127042	0.116442
Phf1	17	26933127	26937891	+	Phf1	protein_coding	0.382778	4.87963	2.59085	0.0127084	0.116442
Rpl37a	1	72711290	72713814	+	Rpl37a	protein_coding	-0.406608	4.50497	-2.59061	0.012716	0.116449
Lypla1	1	4807788	4848411	+	Lypla1	protein_coding	-0.422115	5.30528	-2.59038	0.0127235	0.116454
Rcc2	4	140700541	140723221	+	Rcc2	protein_coding	0.250886	6.66555	2.59011	0.0127321	0.116469
Sf3b4	3	96172332	96177565	+	Sf3b4	protein_coding	0.408005	4.64421	2.58991	0.0127388	0.116469
Arhgap1	2	91649860	91672327	+	Arhgap1	protein_coding	0.311175	5.89828	2.58957	0.0127496	0.116485
Fbxw4	19	45578254	45660313	-	Fbxw4	protein_coding	0.48748	4.09259	2.58896	0.0127693	0.116485
Hnrnpul1	7	25721165	25754758	-	Hnrnpul1	protein_coding	0.25874	6.12929	2.58851	0.0127839	0.116485
Fam174a	1	95313623	95335285	+	Fam174a	protein_coding	-0.311542	5.55342	-2.58816	0.0127952	0.116485
Cacng3	7	122670492	122769394	+	Cacng3	protein_coding	0.301178	7.24447	2.58812	0.0127968	0.116485
Shoc2	19	53944306	54033269	+	Shoc2	protein_coding	-0.209552	6.21773	-2.58801	0.0128003	0.116485
Irf2bp2	8	126588296	126593987	-	Irf2bp2	protein_coding	0.24987	5.61917	2.58741	0.0128196	0.116485
C630031E19Rik	12	29675628	29686446	-	C630031E19Rik	antisense	0.279566	0.400056	2.58706	0.0128312	0.116485
Hpgds	6	65117293	65144909	-	Hpgds	protein_coding	-0.281408	3.32418	-2.58679	0.0128398	0.116485
Igsf9	1	172481788	172498879	+	Igsf9	protein_coding	0.468264	2.09245	2.58651	0.0128489	0.116485
Ago1	4	126435012	126468584	-	Ago1	protein_coding	0.31073	6.68633	2.58638	0.0128532	0.116485
Raver1	9	21074158	21092009	-	Raver1	protein_coding	0.580383	5.06061	2.58634	0.0128544	0.116485
Mink1	11	70562881	70614484	+	Mink1	protein_coding	0.415963	7.93345	2.58576	0.0128732	0.116485
Snca	6	60731575	60829856	-	Snca	protein_coding	-0.245438	7.9988	-2.58565	0.0128769	0.116485
Gng4	13	13784059	13827897	+	Gng4	protein_coding	-0.302101	6.27702	-2.5856	0.0128786	0.116485
Lrrc9	12	72441866	72530751	+	Lrrc9	protein_coding	-0.305316	1.42365	-2.58537	0.012886	0.116485
Bhmt2	13	93655720	93674303	-	Bhmt2	protein_coding	0.239256	0.507793	2.58528	0.012889	0.116485
Rasgrp4	7	29134851	29153962	+	Rasgrp4	protein_coding	0.368441	2.61693	2.58512	0.0128944	0.116485
Bcar1	8	111710474	111743810	-	Bcar1	protein_coding	0.315151	5.53699	2.5851	0.012895	0.116485
Tmem231	8	111912011	111933882	-	Tmem231	protein_coding	0.233186	4.04025	2.58505	0.0128966	0.116485
Matn1	4	130944385	130955476	+	Matn1	protein_coding	-0.263602	0.33764	-2.58495	0.0128999	0.116485
Sh2d4b	14	40813789	40893267	-	Sh2d4b	protein_coding	0.40048	0.502418	2.58445	0.012916	0.116485
Ndufb4	16	37647170	37654454	-	Ndufb4	protein_coding	-0.409334	3.89849	-2.58406	0.0129288	0.116485
Oasl2	5	114896936	114912235	+	Oasl2	protein_coding	-0.632559	2.22683	-2.58381	0.0129371	0.116485
Htr4	18	62324204	62467803	+	Htr4	protein_coding	0.56758	1.57006	2.58329	0.0129541	0.116485
Yipf1	4	107314363	107359824	+	Yipf1	protein_coding	-0.294029	4.69241	-2.58312	0.0129596	0.116485
Snrpa	7	27187005	27196272	-	Snrpa	protein_coding	0.347178	4.31732	2.58307	0.0129613	0.116485
Mthfsl	9	88688602	88720297	-	Mthfsl	protein_coding	-0.374966	2.4828	-2.58294	0.0129656	0.116485
N4bp1	8	86808160	86885259	-	N4bp1	protein_coding	0.375286	6.31246	2.58279	0.0129704	0.116485
Kcnt1	2	25863734	25918274	+	Kcnt1	protein_coding	0.305517	6.87824	2.58244	0.0129819	0.116485
Armc1	3	19131402	19163066	-	Armc1	protein_coding	-0.267843	6.89482	-2.58244	0.012982	0.116485
Nectin1	9	43743984	43807462	+	Nectin1	protein_coding	0.495196	5.30489	2.58224	0.0129887	0.116485
Hexb	13	97176331	97198358	-	Hexb	protein_coding	-0.261857	6.41353	-2.58219	0.0129903	0.116485
Sez6	11	77930800	77979049	+	Sez6	protein_coding	0.435307	7.72993	2.58204	0.0129952	0.116485
Rasip1	7	45627488	45639094	+	Rasip1	protein_coding	-0.391558	2.77671	-2.58199	0.0129969	0.116485
Nubp2	17	24882611	24886351	-	Nubp2	protein_coding	-0.288018	4.80745	-2.58181	0.0130026	0.116485
Clstn3	6	124430759	124464795	-	Clstn3	protein_coding	0.229668	8.36967	2.5817	0.0130062	0.116485
Aars	8	111033144	111057665	+	Aars	protein_coding	0.18457	7.51263	2.58161	0.0130094	0.116485
Lonp1	17	56614297	56626888	-	Lonp1	protein_coding	0.22347	5.91509	2.58153	0.013012	0.116485
Aatk	11	120007313	120047168	-	Aatk	protein_coding	0.493242	7.80305	2.58143	0.0130153	0.116485
9330162012Rik	13	24937401	24941418	+	9330162012Rik	bidirectional_promoter_lncRNA	-0.366267	2.07624	-2.58112	0.0130256	0.116516
Braf	6	39603237	39725464	-	Braf	protein_coding	0.321428	7.52703	2.5808	0.0130359	0.116525
Sox8	17	25565892	25570687	-	Sox8	protein_coding	0.307389	5.63392	2.58067	0.0130404	0.116525
Sf1	19	6363690	6378031	+	Sf1	protein_coding	0.276392	6.57827	2.57999	0.0130627	0.116541
Ctdsp2	10	126978717	126999976	+	Ctdsp2	protein_coding	0.294311	6.85074	2.5795	0.0130788	0.116541
Slc35a4	18	36679215	36683862	+	Slc35a4	protein_coding	0.282529	5.80584	2.57939	0.0130825	0.116541
Hadhb	5	30155248	30184594	+	Hadhb	protein_coding	-0.359889	4.68595	-2.57917	0.01309	0.116541
Krba1	6	48395586	48419782	+	Krba1	protein_coding	0.403203	5.10653	2.57904	0.013094	0.116541
Cacna1b	2	24603887	24763153	-	Cacna1b	protein_coding	0.394073	6.63925	2.57853	0.0131111	0.116541
H2afv	11	6427229	6444444	-	H2afv	protein_coding	-0.287313	5.39003	-2.57827	0.0131195	0.116541
Cd55b	1	130388537	130423010	-	Cd55b	protein_coding	0.159452	0.270228	2.57816	0.0131233	0.116541
Nanos3	8	84173731	84185218	-	Nanos3	protein_coding	-0.20566	0.568537	-2.57811	0.013125	0.116541
Tvp23a	16	10420557	10447363	-	Tvp23a	protein_coding	0.15994	5.82751	2.57807	0.0131264	0.116541
Polr3h	15	81888228	81926241	-	Polr3h	protein_coding	-0.208237	5.52	-2.57803	0.0131276	0.116541
Tacstd2	6	67534062	67535797	-	Tacstd2	protein_coding	0.173959	0.248324	2.57779	0.0131356	0.116541
Slc4a2	5	24423837	24440951	+	Slc4a2	protein_coding	0.377209	4.44574	2.57775	0.0131368	0.116541
Pard6b	2	168081004	168101204	+	Pard6b	protein_coding	0.350508	2.79207	2.57771	0.0131383	0.116541
Tmem222	4	133266045	133277793	-	Tmem222	protein_coding	-0.172332	6.4678	-2.57727	0.0131528	0.116608
B3gat1	9	26733728	26763102	+	B3gat1	protein_coding	0.250157	7.95538	2.57661	0.0131748	0.116651
Prps1	X	140456613	140476141	+	Prps1	protein_coding	-0.282748	6.16211	-2.57638	0.0131826	0.116651
Pla2g2f	4	138750533	138757627	-	Pla2g2f	protein_coding	0.18385	0.225974	2.57638	0.0131826	0.116651
Kif18a	2	109280738	109341748	+	Kif18a	protein_coding	-0.364459	1.183	-2.57625	0.0131867	0.116651
Mapre3	5	30814641	30866107	+	Mapre3	protein_coding	0.358306	7.45846	2.57591	0.0131982	0.116651
Aspn	13	49544443	49567566	+	Aspn	protein_coding	-0.340409	1.28191	-2.57589	0.0131989	0.116651
Hspe1	1	55088132	55091308	+	Hspe1	protein_coding	-0.431433	4.99276	-2.57531	0.0132183	0.116659
Ptgr2	12	84285232	84315833	+	Ptgr2	protein_coding	-0.409765	5.79531	-2.57527	0.0132197	0.116659
Nfyb	10	82748701	82764145	-	Nfyb	protein_coding	-0.225198	5.76916	-2.57524	0.0132204	0.116659
Hnrnpu	1	178321108	178337798	-	Hnrnpu	protein_coding	0.225258	8.31781	2.57482	0.0132345	0.116722
Pcgf2	11	97688823	97700498	-	Pcgf2	protein_coding	0.365548	4.0619	2.57428	0.0132528	0.116747
Psme4	11	30771726	30880362	+	Psme4	protein_coding	0.302888	5.87785	2.57398	0.0132626	0.116747
Phc2	4	128654702	128752882	+	Phc2	protein_coding	0.348553	6.26984	2.57397	0.0132629	0.116747
Tax1bp1	6	52713729	52766781	+	Tax1bp1	protein_coding	-0.22094	7.35364	-2.57391	0.013265	0.116747
Nup210	6	91013068	91116830	-	Nup210	protein_coding	0.420205	4.59616	2.57318	0.0132894	0.116747
Ppt2	17	34616662	34628511	-	Ppt2	protein_coding	0.254125	4.41921	2.57299	0.013296	0.116747
Lrrc45	11	120713925	120721129	+	Lrrc45	protein_coding	0.387206	4.55635	2.57298	0.0132963	0.116747
Fscn1	5	142960343	142973186	+	Fscn1	protein_coding	0.375595	7.57507	2.57293	0.0132977	0.116747
Rcor2	19	7267325	7275226	+	Rcor2	protein_coding	0.342749	3.33003	2.57261	0.0133087	0.116747
Tprkb	6	85911865	85930285	+	Tprkb	protein_coding	-0.255134	6.42936	-2.57252	0.0133117	0.116747
Fam163b	2	27110380	27142492	-	Fam163b	protein_coding	0.40524	8.03479	2.57221	0.013322	0.116747
Pop1	15	34495304	34530649	+	Pop1	protein_coding	0.401425	2.9691	2.57209	0.013326	0.116747
Dgkz	2	91932824	91975865	-	Dgkz	protein_coding	0.383961	8.26448	2.57207	0.0133268	0.116747
Pyurf	6	57686576	57692079	-	Pyurf	protein_coding	-0.247198	5.30586	-2.57173	0.0133382	0.116787
Adamtsl5	10	80339110	80348413	-	Adamtsl5	protein_coding	0.437622	2.92296	2.57055	0.0133782	0.116858
Slc25a12	2	71271063	71367750	-	Slc25a12	protein_coding	0.152222	7.06902	2.57046	0.0133812	0.116858
Adgrb2	4	129984870	130022634	+	Adgrb2	protein_coding	0.355255	7.71505	2.5704	0.013383	0.116858
Gss	2	155563181	155592811	-	Gss	protein_coding	-0.275086	3.55774	-2.57038	0.0133836	0.116858
Cd151	7	141467392	141471474	+	Cd151	protein_coding	-0.275767	4.71385	-2.57033	0.0133855	0.116858
Slc6a17	3	107467543	107518019	-	Slc6a17	protein_coding	0.276783	9.01214	2.57027	0.0133876	0.116858
Serf2	2	121449195	121458314	+	Serf2	protein_coding	-0.273306	6.48192	-2.56981	0.0134031	0.116933
Gramd1b	9	40293233	40531384	-	Gramd1b	protein_coding	0.400713	5.97518	2.56909	0.0134275	0.117037
Pgap3	11	98388677	98400491	-	Pgap3	protein_coding	0.328921	3.39387	2.56904	0.0134289	0.117037
Xab2	8	3608421	3621317	-	Xab2	protein_coding	0.234223	5.09117	2.5688	0.0134371	0.117049
Dym	18	75018772	75286967	+	Dym	protein_coding	0.173937	5.66414	2.56837	0.0134519	0.117097
Atp2b2	6	113743831	114042614	-	Atp2b2	protein_coding	0.395235	9.95492	2.56813	0.0134599	0.117097
Trio	15	27730651	28025849	-	Trio	protein_coding	0.295859	6.79849	2.56803	0.0134633	0.117097
Brd3	2	27445579	27507663	-	Brd3	protein_coding	0.209014	5.50891	2.56699	0.0134987	0.117303
Phpt1	2	25573430	25575225	-	Phpt1	protein_coding	-0.280133	5.25016	-2.56691	0.0135015	0.117303
Nnt	13	119335448	119408998	-	Nnt	protein_coding	-0.295006	4.7408	-2.56672	0.0135079	0.117303
Klf5	14	99298691	99315037	+	Klf5	protein_coding	0.355479	2.94816	2.56603	0.0135313	0.117412
Btf3l4	4	108814295	108833615	-	Btf3l4	protein_coding	-0.229635	6.06737	-2.56595	0.0135343	0.117412
Rbbp9	2	144542265	144550870	-	Rbbp9	protein_coding	-0.191848	5.67959	-2.56534	0.0135551	0.117528
Fibcd1	2	31813290	31846006	-	Fibcd1	protein_coding	0.441102	3.75931	2.56492	0.0135693	0.117528
Maml1	11	50255634	50292312	-	Maml1	protein_coding	0.421023	3.84581	2.56492	0.0135694	0.117528
Erich3	3	154663859	154767791	+	Erich3	protein_coding	0.430536	3.44433	2.56475	0.0135753	0.117528
Ttbk1	17	46442448	46487676	-	Ttbk1	protein_coding	0.556408	6.56953	2.56339	0.0136218	0.117867
Cdc14b	13	64189268	64275291	-	Cdc14b	protein_coding	0.250818	3.93848	2.5632	0.0136283	0.117867
Rhobtb2	14	69784990	69805637	-	Rhobtb2	protein_coding	0.21467	7.28731	2.56297	0.013636	0.117873
Setd5	6	113077365	113153436	+	Setd5	protein_coding	0.366152	6.83182	2.56268	0.0136462	0.117884
Rabep1	11	70844778	70943106	+	Rabep1	protein_coding	-0.220641	7.41309	-2.56245	0.0136539	0.117884
Rps6ka5	12	100548439	100726984	-	Rps6ka5	protein_coding	0.309024	4.91339	2.56233	0.0136581	0.117884
4930447N08Rik	3	122761955	122802049	-	4930447N08Rik	processed_transcript	0.277104	0.495728	2.56205	0.0136677	0.117907
Zfp740	15	102203249	102215607	+	Zfp740	protein_coding	0.285435	6.32654	2.56155	0.0136852	0.117997
Trap1	16	4039971	4077828	-	Trap1	protein_coding	-0.156671	5.75402	-2.56114	0.0136992	0.117997
Tmem41b	7	109972187	109986930	-	Tmem41b	protein_coding	-0.26397	5.12767	-2.56067	0.0137153	0.117997
Pi4k2a	19	42090435	42122219	+	Pi4k2a	protein_coding	0.199085	6.66414	2.56048	0.0137219	0.117997
Cenpl	1	161070713	161086725	+	Cenpl	protein_coding	-0.330961	1.3402	-2.5604	0.0137247	0.117997
Hk1	10	62268855	62379909	-	Hk1	protein_coding	0.293127	8.41623	2.56017	0.0137327	0.117997
Timm8b	9	50603910	50605321	+	Timm8b	protein_coding	-0.368008	6.30899	-2.5599	0.0137421	0.117997
B4galnt4	7	141061104	141072401	+	B4galnt4	protein_coding	0.386085	5.80295	2.55988	0.0137428	0.117997
Sar1b	11	51763687	51791926	+	Sar1b	protein_coding	-0.297737	5.75563	-2.55976	0.0137469	0.117997
Mgst1	6	138140316	138156756	+	Mgst1	protein_coding	-0.530962	2.85294	-2.55969	0.0137493	0.117997
Ppic	18	53406341	53418008	-	Ppic	protein_coding	-0.380532	1.10125	-2.55953	0.0137548	0.117997
Tyrobp	7	30413760	30417586	+	Tyrobp	protein_coding	-0.547279	3.94111	-2.55907	0.0137708	0.118076
Pnmal2	7	16944682	16948829	+	Pnmal2	protein_coding	0.311853	8.47727	2.55881	0.0137799	0.118094
Aasdhppt	9	4294793	4309472	-	Aasdhppt	protein_coding	-0.249815	4.90064	-2.55845	0.0137923	0.118136
Sycp2	2	178345293	178407686	-	Sycp2	protein_coding	0.220537	1.2182	2.55769	0.0138187	0.118136
Mfn2	4	147873599	147904705	-	Mfn2	protein_coding	0.241783	7.66139	2.55765	0.0138203	0.118136
Camsap1	2	25926838	25983283	-	Camsap1	protein_coding	0.291464	6.54222	2.55736	0.0138303	0.118136
Adgrg3	8	95017692	95045251	+	Adgrg3	protein_coding	-0.199113	0.245915	-2.55721	0.0138355	0.118136
Gm12925	4	123665881	123671218	+	Gm12925	antisense	0.141427	0.176226	2.55704	0.0138414	0.118136
4930444F02Rik	10	18796806	18831931	-	4930444F02Rik	lincRNA	0.138966	0.333217	2.55685	0.0138479	0.118136
Zdhhc2	8	40423815	40510269	+	Zdhhc2	protein_coding	-0.326954	5.50317	-2.55681	0.0138492	0.118136
Synm	7	67730160	67759743	-	Synm	protein_coding	0.305261	5.86128	2.55681	0.0138495	0.118136
Carm1	9	21546894	21592624	+	Carm1	protein_coding	0.405619	5.77159	2.5565	0.0138603	0.118136
Crat	2	30400471	30415814	-	Crat	protein_coding	0.326712	5.7994	2.55642	0.0138631	0.118136
Pcdh1	18	38185914	38212054	-	Pcdh1	protein_coding	0.606169	6.44902	2.55618	0.0138712	0.118136
Rpl39	X	37082520	37085403	-	Rpl39	protein_coding	-0.418227	4.02737	-2.55601	0.0138772	0.118136
Rps2	17	24718116	24721930	+	Rps2	protein_coding	-0.392433	4.97813	-2.55586	0.0138823	0.118136
Mroh1	15	76380261	76453039	+	Mroh1	protein_coding	0.331258	5.32	2.55531	0.0139015	0.118145
Ttc7b	12	100300770	100520827	-	Ttc7b	protein_coding	0.243269	7.5321	2.55528	0.0139028	0.118145
Sik1	17	31844248	31855793	-	Sik1	protein_coding	0.569172	3.77795	2.55522	0.013905	0.118145
Ddx42	11	106216926	106249140	+	Ddx42	protein_coding	0.235647	6.67202	2.55504	0.0139113	0.118145
Gpr39	1	125676995	125873863	+	Gpr39	protein_coding	-0.422842	3.14697	-2.55465	0.013925	0.118202
Erp44	4	48193323	48279559	-	Erp44	protein_coding	-0.253702	5.05361	-2.55433	0.0139361	0.118238
[truncated: 2,674 more rows]

## Sheet: stratified nPM, DE WGCNA p<0.05
Female B6 nPM	logFC	t	P.Value	adj.P.Val		M1	M2	M3	M4		Male B6 nPM	logFC	t	P.Value	adj.P.Val		M5		Female E3 nPM	logFC	t	P.Value	adj.P.Val		M6	M7	M8	M9	M10		Female E4 nPM	logFC	t	P.Value	adj.P.Val		M11	M12	M13		Male E3 nPM	logFC	t	P.Value	adj.P.Val		M14	M15	M16
AY036118	1.43832	6.25222	3.76068e-05	0.57758		Tmem128	Pabpc1l2b-ps	Itgad	Gm2451		Pipox	-1.57935	-4.80219	0.000305016	0.914074		Afap1		Xirp2	0.676977	6.17477	0.000188428	0.249652		Arhgdib	Acsbg1	1810020O05Rik	1700003F12Rik	Rasgrf2		Tgtp1	-0.940889	-7.05557	3.89242e-05	0.737341		1110004F10Rik	1700120G07Rik	1700011M02Rik		Pde6g	0.388109	6.31627	7.42724e-05	0.999829		1700018G05Rik	2610528A11Rik	1700029M20Rik
Gm26896	-2.00397	-6.13524	4.50243e-05	0.57758		Gm17748	Gstp1	Gm33543	Ptpn23		Ano7	-1.47646	-4.56488	0.000474179	0.914074		Osbpl7		Xlr4b	0.408538	5.95159	0.000245499	0.249652		4833415N18Rik	Vaultrc5	4833420G17Rik	1810010D01Rik	Camkk1		Eci3	-0.413202	-5.3054	0.000371228	0.763877		1700003E16Rik	1810041L15Rik	1700094J05Rik		Hhat	-0.389927	-4.85923	0.000596454	0.999829		1700067P10Rik	4833417C18Rik	A930003O13Rik
Pcdha2	-2.55597	-5.81789	7.4077e-05	0.57758		Nkx3-1	Ftl1-ps1	AC126040.2	Pcdh1		Dsg1c	-1.78362	-4.5442	0.000492922	0.914074		Gm7514		Hist1h4i	-0.784178	-5.77093	0.000305579	0.249652		Foxp2	Mapre1	4930407G08Rik	2200002D01Rik	Jade3		Sycp2	0.416732	5.13627	0.000471925	0.763877		1700012C14Rik	2210406O10Rik	1700109G14Rik		Snora73a	0.369462	4.82202	0.000631525	0.999829		2010016I18Rik	4930471M09Rik	Adcy4
Cacnb1	1.22626	5.44648	0.00013506	0.57758		Wapl	Csnk1g2	Gm12531	Ak1		Srpx2	1.49786	4.42871	0.00061262	0.914074		Gm4817		1700020A23Rik	0.533363	5.59442	0.000380057	0.249652		B3gnt2	Oaf	4930444M15Rik	4933404K08Rik	Umodl1		Fbxl21	0.523908	5.13617	0.000471988	0.763877		1700113H08Rik	2810474O19Rik	1700125H20Rik		Glrp1	-0.281446	-4.66045	0.000811191	0.999829		2310002D06Rik	4930502E18Rik	Agrn
Gm8242	-2.08523	-5.41926	0.000141245	0.57758		Kctd6	Uqcc3	1300017J02Rik	Gm4609		E230020A03Rik	1.18926	4.18221	0.000978954	0.914074		Gm12344		Tacr2	0.437037	5.45889	0.000450641	0.249652		Cradd	Asrgl1	5830473C10Rik	A330008L17Rik	Klhl42		Mir6390	0.404761	5.08747	0.000506151	0.763877		1810009A15Rik	4732471J01Rik	4833422C13Rik		AA467197	-0.259308	-4.62012	0.000864002	0.999829		4930513N10Rik	4930519F16Rik	Ankrd16
Gm45507	-1.78526	-5.36919	0.000153414	0.57758		4930480K23Rik	Rpl8	1500012K07Rik	Gm4735		Chrna5	1.92359	4.154	0.00103331	0.914074		Vps13a		Nxf7	0.691369	5.45867	0.000450765	0.249652		Arl14ep	Bmpr1b	AI507597	A830082N09Rik	Cep152		Il10rb	-0.421206	-4.99312	0.000580075	0.763877		1810044D09Rik	4930513D17Rik	4930572O13Rik		Odf3l2	0.290841	4.47686	0.00108296	0.999829		4930526L06Rik	9530026P05Rik	Apof
Gm26672	-1.60184	-5.28796	0.000175557	0.57758		Dnah14	Rfx1	1700019G24Rik	Zer1		Nynrin	-2.13373	-4.15387	0.00103358	0.914074		Htr1f		Scn10a	0.408044	5.42561	0.000470071	0.249652		Gnb4	F3	Abca15	AF366264	Tnfrsf8		Slc22a18	-0.401491	-4.77061	0.000804129	0.763877		4732416N19Rik	4930526I15Rik	5830411N06Rik		Ooep	0.255073	4.39018	0.00124326	0.999829		4930545H06Rik	A330008L17Rik	Asgr2
Gm21986	-1.97293	-5.25441	0.000185658	0.57758		Gm12024	Ppp2r5d	1700047K16Rik	Bsdc1		Gm36378	-1.49839	-4.03401	0.00130133	0.914074		5830444B04Rik		Ccdc18	-0.903	-5.41055	0.000479159	0.249652		Hs6st2	Hnrnpf	Ackr2	Aldoart1	Zbtb8b		AA465934	-0.317314	-4.72612	0.000859122	0.763877		5730408K05Rik	4930545H06Rik	Adam21		Gli2	0.408728	4.31601	0.00140029	0.999829		4930549G23Rik	A430090L17Rik	Atp11a
Mink1	1.29686	5.05477	0.000259846	0.57758		Gm26896	Tmem101	1700056E22Rik	Spindoc		Hmcn1	-1.65836	-4.0239	0.00132695	0.914074		Ninj2		Hepacam2	0.370755	5.39622	0.000487993	0.249652		Ckb	Cbr3	Aldh16a1	B930018H19Rik	Pfkm		Smco4	-0.361169	-4.67771	0.000923554	0.763877		Aadat	4933412O06Rik	Alpk3		E030013I19Rik	0.304617	4.25048	0.00155639	0.999829		4931423N10Rik	AF529169	B4galt4
Gm12978	-1.9788	-5.00349	0.000283532	0.57758		Kif11	Slc7a6os	2700068H02Rik	Gale		Grid2ip	-1.42565	-4.00263	0.00138254	0.914074		1500035N22Rik		Spaca6	0.720107	5.30872	0.000545873	0.249652		Ap1s2	Dhx15	Amy2a3	Cxcr6	Enc1		Gm14305	0.484669	4.59201	0.00105054	0.763877		Abcf3	4933424G05Rik	Ankrd49		2310002D06Rik	-0.410153	-4.24743	0.00156408	0.999829		9330136K24Rik	Aanat	Bcl6
Smarcd1	0.933193	4.95176	0.000309728	0.57758		Gm43457	Gm26809	5330411J11Rik	Gm10327		Greb1	-1.05339	-3.95473	0.00151659	0.914074		Gm47724		Gm16294	0.506223	5.22817	0.000605787	0.249652		Ly6g6e	Cggbp1	Arrdc5	Cyp2d37-ps	Spryd3		Tmem253	0.420118	4.56644	0.00109193	0.763877		Abhd17b	9430069I07Rik	Arsi		Gldn	-0.438172	-4.14414	0.00184986	0.999829		A630066F11Rik	Abca9	Bmp4
Gm44597	-1.7012	-4.95149	0.000309866	0.57758		Gm11266	Asb6	A330043C09Rik	Amer3		Gm2541	1.22931	3.90961	0.00165499	0.914074		Gm5417		Plin2	-0.55848	-5.21707	0.000614589	0.249652		Coa5	Gja1	Atp7b	D6Ertd527e	Stard8		St6gal2	0.480497	4.52396	0.00116456	0.763877		Abhd6	9630013K17Rik	Atl1		Fbxl13	-0.446184	-4.13619	0.00187401	0.999829		A830019L24Rik	Acat3	Brd3
Dnal4	1.42187	4.89477	0.000341535	0.57758		Gm11843	Gm6756	AA467197	Eno1b		Mroh8	-1.25968	-3.9046	0.00167112	0.914074		AU022133		Muc6	0.822584	5.20098	0.000627591	0.249652		Neto2	Map2	Card9	Gabrb3	Zfp12		Bsg	-0.210772	-4.38921	0.00143093	0.763877		Aco2	A730090N16Rik	B230307C23Rik		S100a8	-0.528369	-4.08563	0.00203556	0.999829		Abca15	Ap2m1	Ccm2l
Gm10222	-1.17399	-4.83967	0.000375556	0.57758		Fbxo17	Slc7a5	AC166110.3	Rbm22		Gm26747	-1.26307	-3.89955	0.00168755	0.914074		Tgm4		Gm6588	0.425626	5.19214	0.000634861	0.249652		Spock3	Mmgt1	Casz1	Ghrh	Anxa11		Slc2a1	-0.257514	-4.33728	0.00155022	0.763877		Adamts13	AI504432	BC051019		Tinagl1	0.61454	4.08032	0.00205337	0.999829		Abcg3	Birc3	Cd300lg
Gm13340	-0.606344	-4.77743	0.000418273	0.57758		AC151299.1	Slc35f3	AC167363.2	Prr12		AC132106.1	1.43649	3.89725	0.00169511	0.914074		Gspt1		Ccdc129	0.553791	5.06212	0.000753044	0.249652		Lhfpl3	Glul	Cenpe	Gjd4	Vps39		A2m	-0.834627	-4.30357	0.00163324	0.763877		Adora2b	Acp7	Camk1d		Adcy4	0.504083	4.03568	0.00220955	0.999829		Actl7b	Cd79b	Cgn
Gm26512	-1.36579	-4.77646	0.00041898	0.57758		Zfp874b	Gm7775	Adgrf2	Ammecr1		Dgkk	-2.67159	-3.83712	0.00190486	0.914074		Stk17b		BC064078	-0.84906	-5.0412	0.00077419	0.249652		Ccm2	Il13ra1	Cep83os	Glrp1	Man1a2		Slc9b1	0.268669	4.26752	0.00172727	0.763877		Aip	Amdhd1	Catsper2		Gm11837	-0.37434	-3.995	0.00236272	0.999829		Adtrp	Cdrt4	Clec11a
Plppr2	1.15509	4.76092	0.000430434	0.57758		Gm8242	Epha8	Agtr1b	Gm5987		Sfrp2	-1.62508	-3.83135	0.00192634	0.914074		Dll3		Ankle1	0.406859	4.97807	0.000841988	0.249652		Tle4	ND4	Col28a1	Gm10538	Arfgap1		Ccr7	0.233968	4.26373	0.00173748	0.763877		Amfr	Amy2a2	Ccdc14		Six5	0.407313	3.9946	0.00236428	0.999829		Aif1l	Ces2g	Cry1
Dgcr8	-1.25051	-4.67211	0.000502503	0.57758		Itpripl1	Gpx3	B230206I08Rik	Gm4654		Shisal2b	-0.91715	-3.8204	0.00196776	0.914074		Ccl17		Fam205c	0.777728	4.92932	0.000898739	0.249652		Klhl2	Slc1a3	Dab1	Gm13648	Rrp1		1810041L15Rik	0.278038	4.24118	0.00179957	0.763877		Ankrd54	Ankrd28	Ccdc67		Gm10494	-0.20276	-3.98558	0.00239977	0.999829		Aig1	Creb3l3	Ctla2a
Rapgef3	1.4614	4.6584	0.000514705	0.57758		AC109255.2	Taldo1	BC051019	Gm13292		Gm17764	-1.76381	-3.81485	0.00198911	0.914074		Ctf1		Muc2	0.265729	4.9	0.000934843	0.249652		Tesc	Glud1	Dcaf10	Gm20125	Tusc5		Adamts18	0.507093	4.22529	0.00184474	0.763877		Ano1	Astn1	Ccdc88a		Maff	0.499443	3.96066	0.00250068	0.999829		Amdhd1	Dag1	Cytl1
Gm16373	-1.63166	-4.6506	0.00052178	0.57758		Gm6693	Rpl28-ps3	BC147527	Gm11185		Fgl1	-1.31724	-3.80863	0.0020133	0.914074		Dlc1		Krt10	-0.660159	-4.87675	0.00096459	0.249652		Zpbp	Lypd6	Dfnb59	Gm20491	Csrnp2		Kcnj5	-0.380587	-4.21865	0.00186395	0.763877		Arf2	Atp10d	Cmss1		Mbnl3	-0.219994	-3.94275	0.0025759	0.999829		Ano4	Dbt	Dbx2
Gm10432	-1.36107	-4.62094	0.000549639	0.57758		Gm14584	Gm5555	Btla	Chst1		Prorsd1	-1.89074	-3.78661	0.00210144	0.914074		Grm8		Msrb2	-0.553035	-4.8636	0.000981866	0.249652		Rftn2	Sema3d	Dis3	Gm26994	Upf3b		Amdhd1	0.353378	4.13432	0.00212739	0.763877		Atp5j	Atp8b5	Crybb3		Adgb	-0.358659	-3.9373	0.00259927	0.999829		Asb4	Ddx43	Ddx39b
Gm10010	-1.67806	-4.60643	0.000563822	0.57758		Grtp1	Mafk	CT027991.1	Gm17383		Scube1	1.56953	3.78517	0.00210732	0.914074		Mesp2		Atp2c2	0.510354	4.83293	0.00102348	0.249652		Rarres1	Utp6	Dok2	Gm6567	Amph		Gm20319	-0.395486	-4.10954	0.00221203	0.763877		B230208H11Rik	Atr	Cwh43		Opalin	-0.451718	-3.91328	0.00270492	0.999829		Atp6v1e2	E030013I19Rik	Dennd2a
Gm45234	2.22266	4.60328	0.000566955	0.57758		Gm44126	Pcdhga12	Cd300ld	Ccdc9b		Gm12757	-0.855977	-3.76696	0.00218334	0.914074		Gm12168		Pla2g4e	0.816159	4.82103	0.00104013	0.249652		Slc35f1	Nalcn	E230029C05Rik	Hes2	Nlrp12		Acp7	0.256472	4.0999	0.00224593	0.763877		BC064078	Bcas3	Dis3		Olfr1033	-0.194834	-3.89033	0.00281006	0.999829		BB123696	Esco2	Dvl3
Gm12697	-1.59393	-4.57467	0.000596224	0.57758		Car15	Slc9a1	Cdk19os	Iqsec2		Gm17552	-1.71169	-3.7425	0.00228988	0.914074		Rab3il1		Myh15	-0.923583	-4.74168	0.00115892	0.249652		Clec12a	Qk	Eif4b	Homez	Etnk2		Arsg	-0.240719	-4.09085	0.00227824	0.763877		Bmp8b	C1galt1	Dnajc19		Mfsd2a	0.352711	3.7977	0.00327968	0.999829		Bpifb3	Frs3os	Elk1
Gm26653	-1.26825	-4.56852	0.000602717	0.57758		AC151284.1	Rps2-ps10	Ces1d	Gm3222		She	1.59594	3.72632	0.00236325	0.914074		Gm47976		Aldob	0.708159	4.72595	0.00118416	0.249652		Bex4	Pum2	Fancm	Igfbp1	Ak5		Procr	-0.260612	-4.09011	0.00228091	0.763877		Bpifb3	C230037L18Rik	Dnajc6		Melk	-0.512803	-3.78166	0.00336897	0.999829		Btg3	Gch1	Eln
Gm47099	-1.71415	-4.56229	0.000609371	0.57758		B130055M24Rik	Chid1	Cryaa	Gm10819		Dmrt2	1.22593	3.72467	0.00237085	0.914074		Ppp1r9b		A330093E20Rik	0.562548	4.71592	0.00120057	0.249652		Scamp1	Mfap3l	Farsa	Klf14	Lifr		Sync	0.441493	4.07725	0.00232773	0.763877		Capn9	Catsper3	Dnm3		Notch4	0.334826	3.75275	0.00353636	0.999829		C86187	Gm10069	Epas1
Rdh12	-1.89773	-4.53235	0.000642432	0.57758		Slfn8	Smarcad1	Fam81b	Lmcd1		Pcdha7	-2.05065	-3.71302	0.00242534	0.914074		Ddi2		Serpinb1b	-0.873131	-4.70121	0.00122507	0.249652		Ano3	Rpa2	Glp2r	Krt16	Frmd6		Cldn22	-0.555107	-4.05659	0.00240505	0.763877		Cbs	Ccr7	Egf		1700003F12Rik	0.304135	3.66782	0.00407983	0.999829		Cdh26	Gm11346	Ffar2
Flvcr2	-1.67194	-4.52646	0.000649161	0.57758		Gm12004	Slc9a3r1	G630030J09Rik	Gm3756		Gm41349	-0.773575	-3.70774	0.00245044	0.914074		Prss22		Hist1h2bm	-0.507644	-4.68789	0.00124772	0.249652		Pgf	Rlbp1	Glra4	Lvrn	Sbno1		Ccdc42	0.411311	4.04691	0.00244222	0.763877		Cby1	Chl1	Fam35a		Hspb1	0.783607	3.6634	0.0041104	0.999829		Cenpa	Gm14461	Fzd4
Tnfrsf11b	-1.62741	-4.50698	0.000671917	0.57758		Eya4	Isoc2b	Gchfr	Grina		Gm30371	1.44432	3.70428	0.00246705	0.914074		AI661453		Fam212a	-0.539193	-4.68066	0.00126021	0.249652		Ndufa10	Bzw1	Gm10220	Map9	Cirh1a		Tcf23	-0.288332	-4.01838	0.00255532	0.763877		Ccdc115	Chsy3	Fam69c		5430402O13Rik	-0.239849	-3.6612	0.00412571	0.999829		Cftr	Gm15972	Galr2
Pakap	-2.85771	-4.50448	0.000674896	0.57758		1700028B04Rik	Gak	Gm11745	Gm3839		Rad51b	-0.756882	-3.70271	0.00247463	0.914074		Gm5883		Myh2	0.572445	4.62077	0.00136894	0.249652		Ap1ar	C1qtnf5	Gm16294	Mir3061	Fam124a		Trip10	-0.364382	-3.98936	0.00267606	0.763877		Cdc123	Cmtr2	Ftcd		4930467E23Rik	0.252686	3.64784	0.00421982	0.999829		Cnga3	Gm2762	Gm10560
Kctd17	0.895177	4.49628	0.000684764	0.57758		Chn1os3	Nfkbia	Gm11767	Fam131a		Cngb1	-1.78285	-3.67113	0.00263196	0.914074		Gm5939		Grap	-0.640031	-4.61552	0.00137894	0.249652		Gap43	Wwtr1	Gm20756	Mir3072	Trafd1		Htr2a	0.508515	3.96946	0.00276227	0.763877		Cfap126	Col14a1	Gc		Slc2a1	0.317179	3.63945	0.00428017	0.999829		Cnot6l	Gm38407	Gm12504
Gm6503	-1.73237	-4.47626	0.000709495	0.57758		Pdgfd	Mlycd	Gm12741	Gm12397		Lrrn4	1.1002	3.6516	0.00273429	0.914074		Tacc1		Trat1	0.291727	4.53553	0.00154149	0.249652		ND5	Zfp882	Gm5475	Muc2	Lrfn2		Mob1b	0.316621	3.969	0.00276429	0.763877		Col4a6	Cpeb4	Gif		Hspg2	0.400945	3.5857	0.00468803	0.999829		Cr2	Gm9047	Gm694
Lonrf3	-1.32944	-4.42482	0.000777402	0.57758		Pm20d1	Gaa	Gm13176	Atp1a3		Igfn1	1.91764	3.6378	0.002809	0.914074		Cabcoco1		Tbc1d1	0.440322	4.52111	0.00157292	0.249652		Apobr	Tubb2b	Gm6592	Nepn	Zscan2		Cav1	-0.340229	-3.95624	0.00282118	0.763877		Cp	Cxcr4	Gm10413		Ankrd61	0.352032	3.57647	0.00476205	0.999829		Cxcl13	Gp1ba	Gmip
Prokr2	1.81015	4.39808	0.00081533	0.57758		Gm36989	Inha	Gm13274	Gm10566		Pcdhac1	2.26187	3.63594	0.00281923	0.914074		Gm47655		Fezf2	0.549061	4.52069	0.00157384	0.249652		Dsel	Fgf1	Gpr137b-ps	Olfr266	Pvr		Wisp3	-0.329285	-3.95028	0.00284814	0.763877		Cpq	Drd5	Gm10789		Elk1	0.177253	3.55677	0.00492409	0.999829		Cxxc4	H2afy3	Gramd4
Dusp9	1.98651	4.39669	0.000817355	0.57758		Lonrf3	Rere	Gm13355	Gtpbp1		Gm11872	-0.909238	-3.62781	0.00286441	0.914074		Gm12021		Vegfd	0.78948	4.5098	0.00159805	0.249652		Tmem252	Klhl5	Gucy1a3	Olfr286	Exoc8		Dmrt3	-0.398364	-3.94783	0.00285932	0.763877		Ctdsp1	E130304I02Rik	Gm13546		Grap2	-0.328612	-3.5456	0.00501848	0.999829		Cyfip1	Kansl2	Homer2
Vps37c	1.21139	4.38076	0.000840917	0.57758		F2rl2	Hdhd3	Gm13480	Ap2m1		Gm5868	-1.39677	-3.62671	0.00287057	0.914074		Zfp652os		Erdr1	1.0402	4.5065	0.00160546	0.249652		Ptrhd1	St8sia4	H2afy3	Parp1	Wdr35		Oxtr	0.330162	3.9249	0.00296611	0.763877		D10Jhu81e	Elfn1	Gm14391		Fut11	0.21836	3.53408	0.00511777	0.999829		Cyp2g1	Lace1	Hspg2
Itpripl2	-2.07026	-4.35897	0.000874305	0.57758		Gm10516	Mink1	Gm14489	Rimklb		Lct	1.30242	3.62458	0.00288252	0.914074		2810454H06Rik		Hist2h2aa1	-0.814288	-4.48682	0.00165045	0.249652		Pik3cg	Add3	Helb	Pnliprp2	Vps8		Ly6c2	-0.485699	-3.90962	0.00303957	0.763877		Dtd1	Epha5	Gm19582		Gpr160	-0.418962	-3.52252	0.00521946	0.999829		Cyp2j6	Lyve1	Id1
Gm5067	-1.23242	-4.34823	0.000891261	0.57758		Gm8586	Ubxn1	Gm14869	Neurl1a		Fign	-1.68367	-3.61519	0.00293593	0.914074		Sympk		2500002B13Rik	-0.470838	-4.47657	0.00167444	0.249652		Tpd52l1	Ticam2	Hif3a	Prps1l1	Plekha1		Ano1	-0.394771	-3.90955	0.00303994	0.763877		Dynlt1b	Fam173b	Gm2011		Ccdc151	0.335595	3.51019	0.00533021	0.999829		Cyp4f37	Mipol1	Ifi35
CT010467.1	2.3088	4.33532	0.000912091	0.57758		Oat-rs1	Sptbn4	Gm14935	Ppp1r10		Gm37206	-1.42454	-3.61436	0.00294068	0.914074		Syna		Hist1h2bg	-0.817375	-4.46801	0.00169473	0.249652		Id4	Fermt2	Hspa1b	Prss46	Gm10389		Efcab10	-0.312762	-3.89106	0.00313143	0.763877		Eci2	Fbxo40	Gm20110		Eng	0.274193	3.50981	0.00533362	0.999829		D630010B17Rik	Mpzl2	Irf1
Phf1	1.40085	4.33252	0.00091668	0.57758		Gm12090	Ccm2	Gm15939	Gm8825		Ccdc114	1.22262	3.60513	0.00299427	0.914074		5730414N17Rik		C030023E24Rik	0.579321	4.43532	0.00177472	0.249652		Hs3st5	Avl9	Hspa2	Psca	Hnrnpu		Pak4	-0.285782	-3.87811	0.00319726	0.763877		Eci3	Fbxo48	Gm527		Ccm2l	0.434868	3.50107	0.00541364	0.999829		Dao	Mthfd2l	Irs1
Gm29216	-0.69292	-4.31334	0.000948734	0.57758		Gm17455	Ndufb7	Gm15970	Ndrg4		Gm19086	-1.13029	-3.59193	0.00307258	0.914074		Herc2		Tmem176b	-0.571707	-4.38076	0.00191742	0.249652		Sparc	CYTB	Iars2	Slc25a29	Upf2		Prox1	0.320154	3.87098	0.00323409	0.763877		Efcab10	Gm12348	Gm572		Vwf	0.384409	3.49184	0.00549956	0.999829		Dph7	Nell2	Irs2
Gm12024	-1.69385	-4.31311	0.000949135	0.57758		4930479D17Rik	Slc6a9	Gm16149	Gm21037		Fezf1	-1.00967	-3.59134	0.0030761	0.914074		Nat8f1		Ghrl	0.438994	4.37159	0.00194259	0.249652		Slc25a53	Hbegf	Igsf10	St8sia3os	Dyrk1a		4930594C11Rik	0.353869	3.85939	0.00329494	0.763877		Exog	Gm13304	Gm8580		Lfng	0.309472	3.46548	0.00575264	0.999829		Duox2	Nkap	Itpripl1
Egfl8	1.83394	4.30487	0.000963259	0.57758		Pakap	Gm1821	Gm16299	Gm3226		Ccdc24	-1.52543	-3.57321	0.00318724	0.914074		Cdkn2c		Cpeb1	0.573725	4.35971	0.00197573	0.249652		Gm10421	Elovl2	Il17c	Tcstv1	Engase		Kdm4d	0.38085	3.8557	0.00331453	0.763877		Fam89a	Gm14305	Gm9573		Gm960	-0.248882	-3.44245	0.00598354	0.999829		E130218I03Rik	Nr2e3	Jun
Vps53	1.07084	4.29662	0.000977627	0.57758		Chrna4	Erf	Gm16310	Vars		Atp10a	-1.21393	-3.56567	0.00323457	0.914074		Rapgef1		Cryba4	-0.651536	-4.34313	0.00202297	0.249652		Gm2061	Mlc1	Klrk1	Tex12	Smoc2		1810009A15Rik	-0.276783	-3.83047	0.00345202	0.763877		Fuom	Gm6525	Gopc		Egfl6	-0.502019	-3.43903	0.00601858	0.999829		Egfl6	Ocel1	Klc4
Gpsm1	1.47573	4.27811	0.00101068	0.57758		Itpripl2	Morc4	Gm16630	Ccdc97		Gm42928	-0.583454	-3.54414	0.00337388	0.914074		Cacna1b		Col19a1	0.83924	4.33116	0.00205784	0.249652		Smim14	Acot1	Krt86	Tgm4	Myh6		Acacb	-0.408363	-3.83042	0.00345233	0.763877		Fzd7	Gnaq	Gpr85		Hscb	-0.304505	-3.43437	0.00606673	0.999829		Emc2	Odf3l2	Lamb2
Gm47415	-1.22517	-4.23615	0.00108997	0.57758		Gm5067	Ccdc28b	Gm17875	Aldoart1		Gm49342	-1.84565	-3.53448	0.00343828	0.914074		Arg2		Pan3	0.396088	4.318	0.00209694	0.249652		Phactr3	Taf9b	Lin37	Tmco5b	Thbs4		Bnipl	0.297053	3.82557	0.00347943	0.763877		Ggact	Gtf3c3	Gpx2-ps1		AW822252	-0.33771	-3.41871	0.00623155	0.999829		Etfdh	Olfr99	Lrp1
D030047H15Rik	1.36338	4.23382	0.00109455	0.57758		Pla2g4a	Drg2	Gm18398	Wdr6		Gm2877	-0.72929	-3.53406	0.00344111	0.914074		Cep131		Chrd	1.01289	4.30838	0.00212601	0.249652		Hist1h2al	Pola1	Lrrc8e	Tsx	Supt16		2210406O10Rik	0.367426	3.819	0.00351653	0.763877		Gjb1	Kdm4d	Hsd17b2		Fut7	0.212665	3.3995	0.00643996	0.999829		Faiml	Pdia2	Lrrc34
Gm17748	-1.42023	-4.23256	0.00109704	0.57758		Mrps28	Npr2	Gm18715	AC133889.1		Gm47694	-1.53256	-3.5335	0.00344489	0.914074		Itgb3		Mid1ip1	-0.440976	-4.30806	0.00212697	0.249652		Brca1	Heph	Matn2	Vmn2r54	Fam132b		Egln1	-0.176287	-3.81812	0.00352151	0.763877		Gm12185	Kirrel2	Hydin		Gm3383	-0.279428	-3.39937	0.0064414	0.999829		Fbxo40	Pes1	Ly6c1
Ptpn7	1.85323	4.2279	0.00110629	0.57758		Gm15573	Smg9	Gm19123	Tecpr1		F5	-1.0286	-3.53289	0.00344906	0.914074		Gm14715		Nqo2	-0.59488	-4.28602	0.00219525	0.249652		Lmo2	Kctd14	Mbd3l2	Zbtb44	Phf20l1		Fam89a	-0.342309	-3.80102	0.00362014	0.763877		Gm16381	Kiss1r	Iqch		Nox4	-0.236061	-3.3939	0.00650202	0.999829		Fstl3	Ppm1g	Lysmd4
B130055M24Rik	-1.49976	-4.2192	0.00112379	0.57758		AA986860	Mov10	Gm20491	Wbp2		Pi16	-1.22243	-3.5321	0.00345436	0.914074		Dapk2		Apol8	0.59194	4.28398	0.00220169	0.249652		Cgref1	Myom3	Mir384		Clk1		Lrrc25	-0.500371	-3.77508	0.00377525	0.763877		Gm1821	Klhl14	Kcnmb4os2		Fn1	0.333	3.36885	0.00678745	0.999829		Glt28d2	Rcl1	Mafg
F2rl2	-2.41111	-4.21058	0.00114139	0.57758		Gm13033	Vps53	Gm26710	Ap5s1		Mei1	1.5669	3.52108	0.00352978	0.914074		5930403N24Rik		I830077J02Rik	-0.59406	-4.27651	0.00222542	0.249652		1700008J07Rik	Gabrg1	Mmp12		Slc13a1		Cd59b	0.298032	3.77189	0.00379484	0.763877		Gprc5c	Klhl7	Lhx4		Gab3	0.291773	3.3683	0.00679392	0.999829		Gm10248	Rnu73b	Magix
Gm4750	1.22772	4.20515	0.00115264	0.57758		Gm19540	Pprc1	Gm26885	Trim3		Gm43766	1.26725	3.50837	0.00361878	0.914074		Gm30371		Gm31763	0.311691	4.27517	0.00222971	0.249652		Nmnat3	Nudt11	Mta2		Gpr68		Ly6a	-0.51965	-3.77134	0.00379823	0.763877		Hadh	Mmp16	Mapk8		Hps1	-0.277411	-3.36634	0.00681675	0.999829		Gm12596	Rp1l1	Mbd1
AA986860	-1.76928	-4.20497	0.00115302	0.57758		3110099E03Rik	Wnt5b	Gm26911	Mvk		AF529169	-1.62589	-3.50334	0.0036546	0.914074		Cdk19		Msantd2	0.663564	4.26143	0.00227421	0.249652		Osbpl8	Bmpr1a	Ntn5		Sytl1		Pde6g	-0.273807	-3.74902	0.00393813	0.763877		Hfe	Mto1	Mctp2		Gcnt7	0.217118	3.35885	0.00690503	0.999829		Gm14085	Rufy4	Mir684-2
Ppp3r2	-1.67574	-4.19604	0.00117177	0.57758		Hmmr	Sh3bgrl3	Gm27209	Cnih2		C230057M02Rik	1.75849	3.50328	0.00365501	0.914074		AC132106.1		Hist1h2al	-0.703175	-4.25235	0.00230411	0.249652		Pcp4	Phgdh	Odf3b		Ap3m2		Ptrf	-0.3715	-3.71859	0.00413765	0.763877		Hint2	Ncaph	Mier1		Oscar	-0.261155	-3.34923	0.00702009	0.999829		Gm16863	Sec14l4	Ndp
Malsu1	-2.10805	-4.18046	0.00120523	0.57758		Gm15129	Rpl19-ps6	Gm28980	Gm5525		Dlgap2	1.33565	3.50149	0.00366786	0.914074		Nras		Rasgrf2	0.667317	4.24329	0.00233439	0.249652		Mbp	Pdxdc1	Olfr212		Il4ra		Tfap2d	0.497716	3.69467	0.00430195	0.763877		Hprt	Ndc1	Mir1970		Serpinb1a	-0.355016	-3.33209	0.00722988	0.999829		Gm19303	Sft2d2	Nfkbia
Apobec1	-1.32348	-4.15342	0.00126568	0.57758		3110039M20Rik	Gas2l1	Gm29106	Nlgn2		Gm29374	-1.26475	-3.50033	0.00367626	0.914074		Smndc1		Camkk1	0.587082	4.21678	0.00242544	0.249652		Slmap	Acadm	Olfr898		Tspan14		Mettl7a1	-0.297547	-3.68471	0.00437229	0.763877		Hsd17b10	Nfkbib	Mir212		Sult1a1	0.445675	3.32869	0.0072723	0.999829		Gm3383	Slc38a7	Nlrp1a
Grtp1	-1.48963	-4.14957	0.00127453	0.57758		Ctsk	Slc26a10	Gm30655	Tef		Gm10501	-1.56344	-3.49943	0.00368273	0.914074		2310043P16Rik		Dlx6os1	-0.546222	-4.20893	0.00245312	0.249652		Plppr5	Ugdh	P2ry4		Dgke		Mrpl18	-0.214293	-3.65982	0.00455347	0.763877		Idh3g	Nmbr	Mylk4		Cyyr1	0.464499	3.3213	0.0073653	0.999829		Gm38671	Srek1ip1	Notch1
Gm3604	-1.64709	-4.14865	0.00127667	0.57758		Zfp101	Gm5178	Gm32296	Pofut1		Cckar	-1.8932	-3.49061	0.00374697	0.914074		Lrsam1		Alpk2	0.299918	4.17256	0.00258585	0.249652		Pcp4l1	Mpeg1	Phf20		Lsm11		Pcsk2os2	0.302599	3.6465	0.00465364	0.763877		Ifi47	Npat	Myoz3		Cd79b	0.234526	3.31275	0.00747444	0.999829		Gm960	Ssr1	Nuak2
Cic	1.15281	4.14177	0.00129268	0.57758		Gm10409	Dbp	Gm34759	Gm4819		Cage1	-1.39994	-3.48704	0.00377327	0.914074		Arf3		Hist1h2bh	-0.856922	-4.17114	0.00259121	0.249652		Lyn	Stxbp3-ps	Phka1		Dlg3		Mup5	-0.274914	-3.60215	0.00500407	0.763877		Igf2os	Nt5c1a	Naa11		Stra6	0.447561	3.31143	0.00749143	0.999829		Gnat1	Tbx22	Optc
Gm5066	-1.65866	-4.14114	0.00129417	0.57758		Pea15b	Tmem184b	Gm37074	Gm10358		Egr1	0.869971	3.48695	0.0037739	0.914074		Srf		Hist1h4m	-0.237316	-4.16244	0.00262416	0.249652		Celf4	Abhd5	Piezo2		Ccdc149		Gsdmd	-0.373312	-3.59736	0.00504347	0.763877		Inafm2	Olfr1344	Nrl		Rgs9bp	0.23073	3.30557	0.00756735	0.999829		Gpr143	Tfcp2l1	Plcb3
Nkx3-1	-1.99652	-4.12973	0.00132122	0.57758		Ndufb2	Vrk3	Gm37371	Klhdc8b		Nwd2	1.20551	3.46696	0.00392474	0.914074		Gna11		Hist1h2be	-0.615083	-4.15779	0.00264194	0.249652		Serpine2	Vhl	Pik3r1		Ppp6r3		Park7	-0.207592	-3.58094	0.00518121	0.763877		Iqcb1	Oxct2b	Olfr877		Gimap8	0.47952	3.29757	0.00767222	0.999829		Gpr160	Tgfbrap1	Plxna3
Bc1	-1.56695	-4.12937	0.00132208	0.57758		Gm3555	Mtor	Gm37859	Bcl9l		Gm6973	1.19349	3.45977	0.00398052	0.914074		Srpx2		Gm13152	-0.646719	-4.15676	0.00264588	0.249652		Ppp2r2a	Fam181b	Polr3e		Gm19897		H2-T-ps	-0.499245	-3.56219	0.00534329	0.763877		Kctd5	Oxtr	Panct2		Ahnak	0.341334	3.29486	0.00770805	0.999829		Gtf2a1l	Them7	Rasgrp4
Gm11474	-1.25743	-4.11147	0.00136573	0.586426		Gm7422	Gm5884	Gm37973	Arhgdia		Zic4	-1.93431	-3.4483	0.00407105	0.914074		Siglecf		Prss43	-0.342182	-4.15489	0.00265311	0.249652		Kcnab1	Mpp6	Rhou		Bhlhe40		Slfn5	-0.505296	-3.5513	0.00543982	0.763877		Kif1c	Pcsk2os2	Pax3		Brinp3	-0.218377	-3.2915	0.00775289	0.999829		Gtpbp8	Tmem82	Rfxap
Hspb3	-1.2325	-4.09764	0.00140048	0.586426		Gm33869	Arid1b	Gm42913	Gm14130		Gm765	2.17192	3.44707	0.00408091	0.914074		Cstad		Pcdh11x	-0.569223	-4.15374	0.00265754	0.249652		Pptc7	2900052N01Rik	Sepsecs		Nup155		Klf8	0.321703	3.54837	0.00546604	0.763877		Klk9	Pold3	Pde6h		4930549G23Rik	-0.286679	-3.28707	0.00781219	0.999829		Hist1h4a	Tnnc2	Rims4
Mvd	1.25592	4.08699	0.00142786	0.586426		Gm43389	Pcx	Gm43182	Mnt		Peg10	-2.22172	-3.44594	0.00408991	0.914074		Gm38391		Mir1291	0.354296	4.14634	0.00268632	0.249652		Hist1h2bj	Psd	Slc1a6		Syn2		Actl10	0.484864	3.54678	0.00548041	0.763877		Leprot	Pomc	Pfn3		Jak3	0.404864	3.28062	0.00789948	0.999829		Hscb	Tsg101	Rnase13
Pdgfd	-1.84882	-4.08132	0.00144265	0.586426		Aim2	Rad9a	Gm43438	Tmem94		Nptxr	1.1262	3.4448	0.00409912	0.914074		Fsip1		Mslnl	0.513863	4.14632	0.00268636	0.249652		Alcam	Rdx	Slc25a12		Irs1		Cmtr2	0.261029	3.532	0.00561533	0.763877		Lmod1	Prelid2	Pou5f2		Tssk4	0.336374	3.27791	0.00793644	0.999829		Ifi44	Uba2	Rnf123
Rpsa-ps11	1.26514	4.06103	0.00149693	0.586426		Tmem37	Slc45a1	Gm44175	Rangap1		Amigo2	-1.70887	-3.43487	0.00417975	0.914074		Kifc1		n-R5s121	-0.80899	-4.14074	0.00270828	0.249652		Synpr	Tbc1d8b	Slc5a12		Pgbd5		Olfr1344	0.316161	3.51796	0.00574681	0.763877		Lrrk1	Prkca	Ppm1e		Insm2	-0.206339	-3.27583	0.00796491	0.999829		Iltifb	Vmn2r57	Rnf125
Gm14845	-1.28137	-4.05329	0.00151818	0.586426		Gm48068	Pja1	Gm44677	Sirpa		Tm4sf5	-1.11253	-3.43127	0.00420936	0.914074		Gm19410		Glp2r	0.673683	4.11727	0.00280257	0.249652		Gstcd	Zfp97	Slc9a3		Zfp276		Ccdc159	0.349025	3.51307	0.00579329	0.763877		Lum	Ptk2b	Ppp1r1c		Nfkbia	0.349195	3.26608	0.00809996	0.999829		Irs4	Vtcn1	Rnf32
4930480K23Rik	-1.96294	-4.05203	0.00152166	0.586426		Gm13168	Gm7604	Gm4660	Ccnd3		P2ry10b	-0.74508	-3.42841	0.00423303	0.914074		Atp2c2		Aifm3	0.626505	4.1117	0.00282545	0.249652		Tyms-ps	St13	Snord32a		Lpcat3		A730090N16Rik	0.245867	3.50255	0.00589472	0.763877		Ly6k	Rab11fip2	Prmt6		Pdia2	0.236227	3.26284	0.00814537	0.999829		Itgb3bp	Zfp595	Sbno2
Gm13033	-1.35469	-4.0369	0.00156422	0.586426		C330018A13Rik	Creld1	Gm47072	Prelp		Gm2721	-0.937393	-3.4226	0.00428153	0.914074		Hpcal4		Mdfi	-0.467249	-4.10561	0.00285069	0.249652		Mctp1	Sftpc	Sphkap		Ikbkap		Adora2b	-0.302114	-3.50134	0.00590648	0.763877		Maf1	Rasal2	Prss3		Klhl41	-0.219346	-3.26159	0.00816284	0.999829		Klrg2	Zfp862-ps	Sema4d
Uqcc3	1.42738	4.02546	0.0015972	0.586426		Gm15697	Rapgef3	Gm47502	Gm3200		CT009627.3	-1.06835	-3.41304	0.00436263	0.914074		Kat6b		Cd209a	-0.750975	-4.10294	0.00286184	0.249652		Ccdc106	Lpcat2	Stx17		Fam208b		Gsto2	-0.413856	-3.49962	0.00592322	0.763877		Magel2	Rgs13	Prss52		Slc16a12	0.328511	3.25929	0.00819528	0.999829		Ldlrad3	Zscan29	Sipa1l2
Pea15b	-1.81099	-4.02423	0.00160079	0.586426		Gm6261	Nelfe	Gm47592	Fbxw9		Pdzd3	0.85059	3.41208	0.00437085	0.914074		Hmgb1-ps9		Adam33	1.12927	4.10107	0.00286964	0.249652		Rab40b	Lxn	Tab3		Rab3gap1		Catsper2	0.361916	3.49589	0.00595982	0.763877		Matn1	Rpgrip1l	Rab30		Timp3	0.174747	3.24865	0.00834708	0.999829		Lyplal1		Slc2a1
Gm26883	1.59143	4.01243	0.00163566	0.586426		2610005L07Rik	Nos3	Gm6288	Pacs1		Stard5	-1.68286	-3.39182	0.00454812	0.914074		Gm10516		n-R5s110	-0.746507	-4.09112	0.00291171	0.249652		Gclm	Tubb2a	Tas2r137		Slc9b1		Igfbp2	-0.491754	-3.49585	0.00596019	0.763877		Mcm2	Saa3	Selp		Sln	-0.283651	-3.24356	0.00842081	0.999829		Mansc4		Slc9a3r2
Ptchd4	-1.31027	-3.99196	0.00169799	0.586426		Gm7451	Abca2	Gm7182	Elfn2		Tdrd6	-1.3579	-3.38509	0.00460865	0.914074		Zdhhc7		A530016L24Rik	0.485707	4.07597	0.00297703	0.249652		Pid1	Maea	Tcaf3		Nrcam		Zfp26	0.21469	3.49096	0.0060085	0.763877		Mcts2	Slc37a3	Slc15a1		Tmem45a	-0.284562	-3.24123	0.00845468	0.999829		Mplkip		Smarcc2
Car15	-1.43903	-3.99052	0.00170246	0.586426		Sp8	Phldb2	Gm8873	Mapre3		2610306M01Rik	-1.41264	-3.38322	0.00462555	0.914074		Acot2		Chka	0.419269	4.06979	0.00300413	0.249652		4933407L21Rik	Fam172a	Tcl1b2		Slc25a51		Cpq	-0.276727	-3.49013	0.00601676	0.763877		Mpc1	Slc9b2	Slc25a16		Gm11201	0.372016	3.23884	0.00848967	0.999829		Mrpl57		Smtn
Gm47547	0.81011	3.98353	0.00172435	0.586426		Scd3	Kdm4b	Gm9530	Fkbp8		Tmem40	-1.28298	-3.37964	0.00465818	0.914074		Sergef		Rgs10	-0.705003	-4.06755	0.003014	0.249652		Spag7	Fkbp9	Tgm7		Rps6kl1		Iigp1	-0.697511	-3.48095	0.00610873	0.763877		Mrpl18	Slco3a1	Slc34a1		Loxl2	0.376588	3.23492	0.00854721	0.999829		Ndufa10		Snora41
AC151299.1	-1.23575	-3.97933	0.00173764	0.586426		Gm48906	Tex264	Gm9710	Mafg		Cyp4b1	0.83706	3.37063	0.0047413	0.914074		Mcm8		Ppp1r14a	-0.823063	-4.0647	0.00302661	0.249652		Isoc1	Rbp1	Tmem67		Doc2a		Atp5k	-0.278407	-3.47749	0.00614368	0.763877		Mrpl22	Slco4c1	Slc6a14		Tead2	0.318546	3.23432	0.00855608	0.999829		Ndufv2		Snrk
Gm8464	1.07599	3.9568	0.0018108	0.586426		Gm2267	Gm2415	Hist1h2bj	Gm5855		3110039M20Rik	1.48499	3.36866	0.00475964	0.914074		Gm6285		Il1f5	-0.36346	-4.05774	0.00305772	0.249652		Mum1l1	Hist1h2bh	Ttc6		Ik		Csmd3	0.332911	3.46818	0.00623897	0.763877		Mrpl33	Sp4	Slc8a1		Tagln2	0.247044	3.22035	0.00876498	0.999829		Nr1i2		Spata2
Acap3	0.751847	3.95179	0.00182751	0.586426		Ska2l-ps	Cbr3	Lao1	Phf1		Gm10156	1.20057	3.36849	0.0047613	0.914074		Lama5		Bex4	-0.62096	-4.04685	0.003107	0.249652		Obfc1	Etfdh	Uchl1os		Zfp251		Bbs1	0.213792	3.44996	0.00642988	0.763877		Mrpl45	Spon1	Snora7a		Slc27a2	-0.27346	-3.21654	0.0088228	0.999829		Olfml1		Sstr4
Cox11	-1.20656	-3.94743	0.00184217	0.586426		Gm49317	Copz2	Nanos2	Sema4b		Adamts16	-1.13481	-3.36722	0.00477311	0.914074		Rbm15		Xkr6	0.611932	4.03941	0.00314115	0.249652		Dhrs13	Nup35	Unkl		Mogs		Kif1c	-0.157845	-3.44714	0.00645998	0.763877		Mrpl55	Sycp2	Tmem102		Mpzl2	0.572476	3.21544	0.00883962	0.999829		Olfr1033		Syne2
Fgfr3-ps	2.00318	3.94632	0.00184591	0.586426		1700029J07Rik	Mga	Nme9	Gm8349		Gm48485	-1.08875	-3.36544	0.00478984	0.914074		4933404O12Rik		Rnu2-10	-0.609912	-4.03207	0.00317527	0.249652		Gm5424	Dbx2	Vnn3		Ift140		Ucp2	-0.586018	-3.44326	0.00650166	0.763877		Mrps16	Sync	Tmem185b		Foxl2os	0.218606	3.21507	0.00884538	0.999829		Olfr1420		Syngap1
Arhgdia	0.72289	3.94327	0.00185626	0.586426		Ube2d2a	Znfx1	Npb	AC083895.1		Enc1	0.800696	3.3583	0.00485745	0.914074		Jcad		Gm3985	0.749024	4.03136	0.00317859	0.249652		Itgb1bp1	Gcnt1	Wbscr27		Sec61a1		Nptxr	0.341629	3.44056	0.00653074	0.763877		Mtch1	Synpo2l	Trpv3		Agt	-0.348739	-3.20013	0.0090766	0.999829		Olfr536		Taf15
Gdpd5	1.33371	3.93803	0.00187418	0.586426		Gm3604	Gm18025	Olfr56	Gmpr		Slc24a5	1.23234	3.34776	0.00495902	0.914074		Trim23		D6Ertd527e	0.282791	4.02707	0.00319871	0.249652		Gm16701	Oat	Wnt10b		Olfr461		Mmp16	0.216819	3.43822	0.0065562	0.763877		Mtfr1l	Tab3	Vps39		Vtcn1	0.210218	3.19701	0.00912571	0.999829		Otulin		Tagln2
Hk1	0.866851	3.93615	0.00188064	0.586426		Simc1	Chkb	Olfr839-ps1	Tuba1b		Hist2h3c2	-0.84655	-3.34539	0.00498219	0.914074		3110067C02Rik		4930511M06Rik	-0.282764	-4.01599	0.00325135	0.249652		Hmga2-ps1	Aph1b	Xntrpc		43709		Epas1	-0.19731	-3.4323	0.00662072	0.763877		Mup5	Thoc2	Zeb2		Gm2762	0.277847	3.19043	0.00923011	0.999829		Pcdhb22		Tbrg3
Gm11266	-1.6301	-3.9277	0.00191002	0.586426		Rspry1	Mfsd13a	Slc10a5	6430548M08Rik		Ipcef1	1.14004	3.34508	0.00498516	0.914074		Celsr2		Gm9839	0.753018	3.99302	0.00336344	0.249652		Bex1	Ndp	Zc3h12a		Tmem57		Tmem98	-0.296543	-3.42499	0.00670147	0.763877		Myg1	Tox2	Zfp493		Trim30e-ps1	-0.240084	-3.18606	0.00930012	0.999829		Pex7		Terf2
Pm20d1	-1.87452	-3.92755	0.00191056	0.586426		2510016D11Rik	Gucy2e	Slc15a5	Mepce		Gm10463	-0.804859	-3.34416	0.00499417	0.914074		Acad9		Cfh	-0.861448	-3.99212	0.00336788	0.249652		Mobp	Twsg1	Zkscan5		Larp4b		Nt5c1a	0.333892	3.42159	0.00673938	0.763877		Naa38	Tox3	Zfp867		Tlr6	0.223059	3.18251	0.00935743	0.999829		Pfdn4		Thbd
Tmem132a	0.936362	3.92731	0.00191138	0.586426		Gm11245	Prdx4	Smok4a	Gm5276		BC018473	-1.32103	-3.34277	0.00500788	0.914074		Gm15808		Dhdh	-0.461601	-3.98971	0.00337991	0.249652		Gmpr	Pgm2	Zmynd15		Rtn4rl1		9130019P16Rik	0.479381	3.41897	0.00676872	0.763877		Nat6	Trpt1	Zkscan5		Cr2	-0.21813	-3.17504	0.0094791	0.999829		Platr8		Tlr6
Gm28439	-0.554467	-3.92296	0.00192669	0.586426		Gm9905	Cdc42se2	Spata31d1b	Gm18827		Gm18066	-1.14939	-3.34042	0.00503099	0.914074		Mmp24		Stx19	0.277934	3.98765	0.00339019	0.249652		St18	Dnpep			Spire1		Igfbp7	-0.521665	-3.41559	0.00680679	0.763877		Ndufb11	Ttll10			Arhgap31	0.295177	3.17108	0.00954421	0.999829		Pof1b		Tmem106a
Gm6047	-1.12559	-3.91538	0.0019537	0.586426		Nit2	Dnah1	Tmem30c	Ap1m1		Chst7	1.05427	3.33228	0.00511212	0.914074		BC049352		Ttn	0.752165	3.98397	0.00340872	0.249652		Scg2	Ube2cbp			Eno4		Foxc1	-0.434362	-3.41042	0.00686534	0.763877		Ndufv1	Ubr1			Zfp236	0.16613	3.16458	0.00965215	0.999829		Pphln1		Tmem161a
Gm6852	-1.15965	-3.89468	0.00202941	0.586426		Tfam	Elp5	Tmod4	Lrrc73		Zfp992	1.19435	3.32208	0.00521549	0.914074		Birc3		Chst8	0.481045	3.98286	0.00341429	0.249652		Angptl4	Gnai3			Clk4		Pmch	-0.291469	-3.40623	0.00691327	0.763877		Npepl1	Uhrf1bp1l			Shb	-0.266741	-3.15638	0.00979012	0.999829		Praf2		Tnrc18
Sez6l2	0.941289	3.89121	0.00204237	0.586426		Gm18305	Ubxn11	Troap	Plppr2		Gm38391	1.34031	3.31622	0.00527589	0.914074		Cpxm2		Lamc2	0.577234	3.97638	0.00344715	0.249652		Rasgef1a	Sppl2a			Sestd1		Zfp646	0.198433	3.4053	0.0069239	0.763877		Nradd	Vwa2			Insig1	-0.236233	-3.15258	0.00985477	0.999829		Rbm12		Trerf1
Gm13716	-1.89709	-3.89077	0.00204402	0.586426		Zfp971	Tdpx-ps1	Vwce	Rac3		Chmp4c	-1.11295	-3.31006	0.00534004	0.914074		Camk1d		Vmn2r84	0.553469	3.97455	0.0034565	0.249652		Fam19a5	Ang			Cdip1		Ctdsp1	-0.24644	-3.39739	0.00701549	0.763877		Nt5c2	Xpnpep3			Dtl	-0.235728	-3.14951	0.00990727	0.999829		Retn		Trim47
Sec14l2	1.02315	3.86721	0.00213453	0.586426		Gm10432	Gm14263	Gm33222	Gm13668		Gm47081	-0.578521	-3.30737	0.00536833	0.914074		Snx2		Pcdhb15	0.736944	3.97441	0.00345722	0.249652		Kcne1l	Dio2			Vasn		Rab11fip2	0.20151	3.38759	0.00713063	0.763877		Nudt22	Zc3h6			6330415G19Rik	-0.377608	-3.14914	0.00991363	0.999829		Rgr		Trim65
Gm26533	1.87009	3.86201	0.00215504	0.586426		Tfb2m	Gm9774	Gm16976	Sbk1		Nmur2	-0.995516	-3.30124	0.00543342	0.914074		Gm48508		n-R5s124	-0.541502	-3.97257	0.00346667	0.249652		Txk	Tmem229a			Zfyve9		Lgals3	-0.459558	-3.38554	0.00715494	0.763877		Oaz1	Zdhhc17			Nwd1	0.183547	3.12777	0.0102874	0.999829		Rgs22		Vav2
Kif11	-1.4114	-3.85921	0.00216619	0.586426		Spef2	Polr1a	Slc9b1	Clip3		Gm128	-0.863462	-3.30026	0.00544386	0.914074		AC126254.1		Vav3	-0.510835	-3.9719	0.00347008	0.249652		Hmgcs2	Tuba1a			Zpr1		Ly6c1	-0.556012	-3.38406	0.00717251	0.763877		Ormdl3	Zfp26			Fkbp5	0.249549	3.1274	0.010294	0.999829		Rida		Vim
Gm19554	-1.55174	-3.85597	0.00217914	0.586426		Asb8	Chd4	Morn3	Afg3l1		Esyt3	-1.40427	-3.29568	0.00549299	0.914074		Col6a6		Spag5	1.18565	3.97067	0.00347645	0.249652		5730508B09Rik	Glra2			Wdr82		Spon1	0.22274	3.38236	0.00719279	0.763877		Panx2	Zfp280d			Gm973	-0.280275	-3.11751	0.010472	0.999829		Rmrp		Vmn2r121
Gm16185	-1.94728	-3.85344	0.0021893	0.586426		Adgrd1	Fads2	Ssmem1	Fzr1		Tmem202	1.12635	3.29117	0.00554194	0.914074		Lrrn4cl		Gm14440	-0.68397	-3.96922	0.00348387	0.249652		Olfr287	Nkain2			Morc2b		4933428G20Rik	0.416632	3.38173	0.00720032	0.763877		Parp3	Zfp386			Fzd4	0.314421	3.11094	0.0105919	0.999829		Rpl5		Wfdc1
Gm16284	-1.68997	-3.84649	0.00221752	0.586426		Prox1os	Gm15782	BC049762	Dlg4		Nov	1.00934	3.29104	0.00554331	0.914074		Gm33533		Osbp2	0.535316	3.96363	0.00351286	0.249652		ND4L	Rprd1a			Pxdn		Nos1	0.31603	3.38134	0.00720506	0.763877		Pcdhb7	Zfp39			Pusl1	-0.288581	-3.08106	0.0111554	0.999829		Rps27		Zfyve27
CT010433.2	-1.52005	-3.8399	0.00224462	0.586426		Gm15706	Csk	Tsnaxip1	Gm7556		B230377A18Rik	-1.04292	-3.29045	0.00554978	0.914074		Gm9847		Lrrc34	-0.417743	-3.96138	0.00352457	0.249652		Rpgrip1	Hdhd2			Magi3		4930578C19Rik	-0.47726	-3.37917	0.00723102	0.763877		Pcsk6	Zfp597			Nphs2	0.235159	3.08085	0.0111594	0.999829		Rsl24d1
Gm960	-1.11666	-3.83741	0.00225491	0.586426		Shmt1	Xpo5	Gm44317	Stat5b		Gm38413	-1.27425	-3.28949	0.00556018	0.914074		Cul5		Mphosph9	0.806016	3.96057	0.0035288	0.249652		Morn4	Zbtb26			Daglb		Gm13710	-0.29754	-3.37478	0.00728397	0.763877		Pecr	Zfp799			Gm7173	-0.29276	-3.07681	0.011238	0.999829		S100a8
Ctsk	-1.63154	-3.83237	0.00227598	0.586426		Slc35a3	Pdrg1	Ccs	Gm8659		Prcd	1.2481	3.28724	0.00558479	0.914074		Dusp19		Gm7102	-0.416441	-3.95131	0.00357758	0.249652		Stk26	Cdc42se2			Fbxo28		Apobec1	-0.485812	-3.37065	0.00733422	0.763877		Prpf38a	Znrf2			1700084J12Rik	-0.241322	-3.07557	0.0112622	0.999829		S100a9
Grina	0.646479	3.82212	0.00231936	0.586426		H2-T24	Prkag1	Gm12454	Sidt2		Camk2a	0.737379	3.28433	0.00561681	0.914074		Mtmr6		1700003F12Rik	0.236794	3.95091	0.00357967	0.249652		Lppos	1810011O10Rik			Btaf1		Matn1	-0.183696	-3.37054	0.00733553	0.763877		Psma7				Adgrl4	0.290662	3.06888	0.0113937	0.999829		Scml2
Tlr1	-1.31488	-3.81769	0.00233841	0.586426		Mcc	Ptov1	Gm42672	Gm6550		Nat8f2	1.33477	3.2798	0.00566701	0.914074		Ints6		Prdm8	0.700368	3.94452	0.00361381	0.249652		Limd2	Gpc5			Exoc1		4930426L09Rik	0.295722	3.36526	0.00740025	0.763877		Psmb4				Scml2	-0.289557	-3.05592	0.011653	0.999829		Sec11c
Gm18980	-2.33983	-3.81613	0.00234513	0.586426		Etfbkmt	0610040J01Rik	Hpd	Ppp2r1a		Cfap77	-0.767562	-3.27688	0.00569959	0.914074		Gm26811		Fzd10	-0.546919	-3.94252	0.00362451	0.249652		Dner	Pdzd8			Nck2		Cldn20	0.312539	3.3608	0.00745541	0.763877		Psmb5				Dzip1l	0.178523	3.05384	0.0116952	0.999829		Serpinb1a
Gm15697	-1.36973	-3.81314	0.00235812	0.586426		Dffb	Ccar2	Ism2	Cacng6		Tfap2d	1.33093	3.27266	0.00574707	0.914074		Gm2099		Herc3	0.427714	3.94157	0.00362964	0.249652		Elk1	Aldh1a7			Dtx2		1700094J05Rik	0.226903	3.355	0.00752765	0.763877		Puf60				Cgn	0.281857	3.04924	0.0117888	0.999829		Serpinb1b
Zfp874b	-1.31525	-3.80376	0.0023993	0.586426		Ikbkap	D430042O09Rik	Gm11271	Pdgfb		Col7a1	-1.04737	-3.2655	0.00582849	0.914074		Robo2		Park2	0.654869	3.93829	0.00364735	0.249652		Lpl	Eps8			Tubg1		Gm16386	0.424701	3.35302	0.00755248	0.763877		Pum3				Tmem106a	0.229641	3.03878	0.0120051	0.999829		Serpind1
Gm48957	-1.91648	-3.79415	0.00244223	0.586426		Lyplal1	Stx5a	Tfap2a	Gm7336		Gm35876	-0.762806	-3.26359	0.00585034	0.914074		Ap1ar		Hrc	0.368847	3.92838	0.00370142	0.249652		Rhbdl2	Kcnj8			Chrnb3		Tmc8	0.259996	3.34853	0.00760918	0.763877		Rab5c				Armc4	-0.267253	-3.03832	0.0120147	0.999829		Sh2d7
Drg2	1.0376	3.78358	0.00249034	0.586426		Gm7838	Tubb5	Umodl1	Ahsa2		Bdh2	-1.07044	-3.25765	0.005919	0.914074		Ttc7b		Cd59a	-0.608547	-3.92717	0.00370809	0.249652		Rrm2	43718			Jmy		Slc9b2	0.369362	3.311	0.00810031	0.763877		Rhoc				Rnf125	0.274292	3.03044	0.0121802	0.999829		Shb
Gm3510	-1.67127	-3.78357	0.00249042	0.586426		Tuft1	Pnpla6	Gm3115	Dot1l		Irs4	-2.20554	-3.2543	0.00595811	0.914074		Gnao1		Car2	-0.551447	-3.92698	0.00370914	0.249652		S1pr1	Cnot6			Nup62		Rgs3	-0.236875	-3.30706	0.00815373	0.763877		Rorc				Cftr	-0.320643	-3.02585	0.0122778	0.999829		Slc22a20
Ppa2	-1.27911	-3.77942	0.00250956	0.586426		Mycbp	Efna1	Gm42495	Gm1840		4921536K21Rik	0.868086	3.25289	0.00597458	0.914074		Gm9370		Ppm1n	0.23364	3.92598	0.00371466	0.249652		Selenbp1	Ncf2			Usp37		Cdk18	0.307646	3.30473	0.00818551	0.763877		Rp9				Ttll9	0.268709	3.0011	0.0128175	0.999829		Slc27a2
Sec16b	-1.41177	-3.77887	0.00251211	0.586426		Tnmd	Irf3	Gm49041	Ccnf		Oprl1	-0.963956	-3.25273	0.00597653	0.914074		Gm15750		Eif4ebp3	0.798493	3.91081	0.00379946	0.249652		Timp3	Tmem51			Mpped1		Krt8	-0.485401	-3.30384	0.00819764	0.763877		Rpp38				Tnfrsf23	0.332339	2.99839	0.012878	0.999829		Smim8
Kcnip3	0.718217	3.77526	0.00252894	0.586426		Tbx3	Top1mt	Rpl31-ps5	Gm5881		AC154457.2	-1.13807	-3.25225	0.00598212	0.914074		4930578M01Rik		Phkg1	-0.503993	-3.91011	0.00380343	0.249652		Klhl1	Sumf2			Dkk3		Zfp109	0.346708	3.29722	0.00828886	0.763877		Rrs1				Pip5k1b	0.220985	2.99142	0.0130352	0.999829		Snapin
Rxrb	1.04967	3.77386	0.00253548	0.586426		Ms4a6c	3110082I17Rik	Gm12732	Slc1a6		Ift140	-1.02488	-3.25069	0.00600044	0.914074		Gm2710		Fabp7	-1.52353	-3.90816	0.00381446	0.249652		Dmkn	Abhd8			Gls		Sdk2	0.442506	3.29633	0.00830112	0.763877		Rtn2				Tgm2	0.319953	2.99057	0.0130544	0.999829		Snora44
Phldb2	1.56983	3.76425	0.00258092	0.586426		Fhl2	Gm5070	Gm14239	Gm33707		Sorbs2	1.05139	3.24815	0.00603048	0.914074		Cd72		Cd59b	-0.455477	-3.90589	0.00382736	0.249652		Erc2	Crlf3			1700109H08Rik		Ccer1	0.163134	3.29008	0.00838823	0.763877		Samd14				Dapk1	0.167102	2.98259	0.0132367	0.999829		Socs6
Tmem37	-0.977743	-3.75757	0.00261301	0.586426		Gm2622	Cul7	Gm15893	Snd1		Gm14620	-1.24915	-3.24392	0.00608083	0.914074		Gm48087		Etnk2	0.59539	3.90097	0.00385555	0.249652		9830147E19Rik	Cpe			Zfp697		Serpinb6a	-0.245834	-3.28734	0.00842675	0.763877		Samd3				Wee2	-0.198356	-2.9796	0.0133058	0.999829		Spg20
Ccl6	-1.04487	-3.75456	0.00262757	0.586426		Tfdp2	Mex3d	Ankdd1a	Pde4a		Gm44997	0.869778	3.24124	0.00611288	0.914074		Slitrk3		Foxr2	0.516138	3.89925	0.00386544	0.249652		Gm10754	Slc25a34			Loxhd1		Krit1	0.213094	3.28078	0.00851955	0.763877		Sap30				Ly6c1	0.278961	2.97566	0.0133973	0.999829		Taf11
Gm43071	-1.0303	-3.73899	0.00270438	0.586426		Mettl15	Tnfaip8l3	Gm31816	Zfp661		Ttc33	-0.971779	-3.23796	0.00615235	0.914074		4930513N10Rik		Rxfp2	0.504173	3.89614	0.00388336	0.249652		Dhdh	Egfl6			Chl1		Crip1	-0.396254	-3.2797	0.00853491	0.763877		Sapcd1				Bcl6	0.210303	2.97221	0.013478	0.999829		Taz
Nr2c2	-1.11762	-3.73368	0.00273111	0.586426		Gm6723	Rap1gap	Commd4	Thtpa		Gm26749	-1.10744	-3.23622	0.00617343	0.914074		Gm5710		Inmt	-0.716336	-3.89572	0.00388581	0.249652		Trpc7	Armcx2			Qsox1		Pon3	-0.419833	-3.26959	0.00868042	0.763877		Sdf2				Tgfb3	0.277	2.96813	0.0135739	0.999829		Tcea1
Gm3764	1.30415	3.73269	0.0027361	0.586426		Ptger3	Dalrd3	Gm3978	Dym		Myh1	0.818048	3.23111	0.00623575	0.914074		5830462I19Rik		Pigb	0.935759	3.88412	0.00395359	0.249652		Sybu	Naaa			Trim72		Parp10	-0.362284	-3.26759	0.00870942	0.763877		Serpind1				Smim8	-0.228223	-2.9575	0.0138274	0.999829		Tceal1
Mgst3	0.818894	3.71839	0.00280952	0.586426		Gm6503	Agbl5	Gm49219	Bex2		Oosp2	-1.22444	-3.22958	0.00625446	0.914074		Aldh3a1		Fam181b	-0.540253	-3.88309	0.00395971	0.249652		A230028O05Rik	Rnase6			Ythdf1		H2-Q6	-0.565709	-3.2661	0.00873123	0.763877		Sesn1				Upk1a	0.276768	2.95528	0.013881	0.999829		Tctex1d1
Pnpla6	0.986697	3.71297	0.0028379	0.586426		Gm13597	AI413582	A230006K03Rik	Prr14		Vegfd	1.30405	3.2235	0.00632966	0.914074		Gm8973		Npnt	0.53121	3.88179	0.00396738	0.249652		Arl5c	Tada1			Prickle1		Gm6566	0.464745	3.26297	0.00877697	0.763877		Slc25a33				A630075F10Rik	-0.35883	-2.95238	0.0139512	0.999829		Thyn1
Gm38391	1.61709	3.70883	0.00285977	0.586426		43534	Cdc42ep1	Gm29736	Tbc1d25		Zfp874b	1.60724	3.22348	0.00632993	0.914074		Gm13735		Cd9	-0.691635	-3.87881	0.00398509	0.249652		Nnat	Smim10l2a			Adam18		Tcn2	-0.406003	-3.25927	0.00883147	0.763877		Smco4				Gm15867	-0.303031	-2.94805	0.0140567	0.999829		Tmem102
Atg2a	1.22056	3.70518	0.00287919	0.586426		2310040G24Rik	Eya1	Mfsd4b3	Htra4		Syna	1.59445	3.22326	0.00633255	0.914074		Gm13302		4933439K11Rik	0.406412	3.87719	0.00399471	0.249652		Utp14b	Lmcd1			Myl1		Rapgef6	0.272639	3.25666	0.00887015	0.763877		Smo				Ada	0.27873	2.94106	0.0142288	0.999829		Tmem45a
Camk2b	0.610838	3.68534	0.00298704	0.586426		B230322F03Rik	Gm2445	Gm14463	Fam3a		Ldoc1	-1.34625	-3.22194	0.00634899	0.914074		Gm21781		Hspb11	-0.60779	-3.86867	0.00404587	0.249652		Pdlim5	Tgfbr1			Gucy1b2		Foxj1	-0.264092	-3.25547	0.00888787	0.763877		Snrnp40				Mrap	-0.164958	-2.94017	0.0142509	0.999829		Tmem45b
Dgat2	1.14294	3.67062	0.00306978	0.586426		Gm45428	Gm5270	Gm21284	Pabpc1l2a-ps		Gm15594	-0.938126	-3.21843	0.00639301	0.914074		Rcc1		Gm5434	-0.53713	-3.86606	0.00406168	0.249652		Mfge8	Cd300a			Fah		Fermt3	-0.573479	-3.254	0.00890975	0.763877		Snrpb				Dph2	0.188353	2.92455	0.0146437	0.999829		Tmie
Itpripl1	-1.11327	-3.66635	0.00309418	0.586426		Gcnt4	Cchcr1	Gm29055	Selplg		Sox1	-1.30651	-3.21708	0.00641	0.914074		Hmgb1-ps2		Hmga2-ps1	-0.50334	-3.86259	0.00408281	0.249652		Trnp1	Cspg5			Zglp1		Bri3	-0.223859	-3.25249	0.00893223	0.763877		Spag16				Pla1a	0.310266	2.91473	0.0148963	0.999829		Tnmd
Slc7a5	0.897552	3.65838	0.0031403	0.586426		Chst3	Gm7935	Paf1	Gigyf1		Mcidas	-1.11394	-3.21453	0.00644216	0.914074		Erfe		Tbc1d24	0.53699	3.86236	0.00408423	0.249652		Angptl7	Rhoq			Cep78		Gm16938	0.29697	3.25199	0.00893967	0.763877		Sptlc3				Serpind1	-0.288475	-2.91373	0.0149222	0.999829		Ttc36
A630072M18Rik	2.40104	3.65741	0.003146	0.586426		Tnfrsf11b	Zswim4	Gm21560	Fam219a		Rel	-1.25513	-3.21133	0.00648271	0.914074		Gm7444		Btbd16	-0.45606	-3.85704	0.00411683	0.249652		Impdh2	Fam69c			Rab40c		Prrc2c	0.283439	3.24853	0.00899168	0.763877		Ssna1				Fgf17	-0.244311	-2.91338	0.0149313	0.999829		Tyrobp
Shroom1	1.42326	3.65116	0.00318271	0.586426		Gm12697	Adam33	Gm48200	Gm4865		Otx1	1.57776	3.2106	0.00649207	0.914074		Fam136b-ps		Elf5	-0.462796	-3.85488	0.00413015	0.249652		Dhrs3	9230116N13Rik			Ube3c		Vps13c	0.517449	3.24735	0.00900944	0.763877		Stom				Hnrnpdl	-0.209511	-2.89582	0.0153952	0.999829		Ucn
Matk	1.14995	3.64397	0.00322554	0.586426		Parp9	Obscn	AC127341.3	Chd5		Cited4	1.6362	3.20006	0.00662782	0.914074		Spred2		4931403G20Rik	0.310387	3.85468	0.0041314	0.249652		Ybx1	Fam105a			Stab2		Aldh1a7	0.331031	3.24668	0.00901951	0.763877		Sys1				Plekhd1	-0.297677	-2.89527	0.0154099	0.999829		Ugt2a1
Gm13597	-0.968442	-3.62769	0.00332463	0.586426		Enkur	Mpdu1	Gm12419	Mgst3		Arg2	1.38962	3.19857	0.00664726	0.914074		Gm7128		Evc2	1.06459	3.8545	0.00413253	0.249652		Krt10	Ptbp3			Atg16l1		Lca5	0.321102	3.24565	0.00903509	0.763877		Tcf23				Bola1	-0.241791	-2.8947	0.0154252	0.999829		Ugt2a2
Cyp46a1	0.818527	3.62224	0.00335847	0.586426		Gm16008	Abcc1	A930032L01Rik	Gm16580		Pcdha12	1.651	3.19385	0.00670919	0.914074		Pcdhb15		Ltk	0.924071	3.8516	0.00415047	0.249652		Ube2g2	A730036I17Rik			Lmna		4732471J01Rik	0.34245	3.24398	0.00906031	0.763877		Teddm3				Scube2	0.268397	2.89006	0.0155504	0.999829		Usp12
Cnih2	1.09049	3.61922	0.00337739	0.586426		Olfr482	Fjx1	AC125141.3	Gm6931		Gm37123	-1.14527	-3.18949	0.00676678	0.914074		1700030C14Rik		Robo3	1.35193	3.84498	0.00419183	0.249652		Lrrn1	Spi1			4931406B18Rik		Hspb2	-0.315394	-3.24019	0.00911811	0.763877		Tgfbi				Helz2	0.312309	2.88882	0.015584	0.999829		Vmn2r1
Shb	1.17002	3.61899	0.0033788	0.586426		Urah	Gm7432	Gm14587	Riox2		0610009E02Rik	-0.849133	-3.18845	0.0067807	0.914074		Enpp4		D930016D06Rik	0.47852	3.83404	0.00426112	0.249652		Ido1	Cenpb			D730045A05Rik		Psmb4	-0.228077	-3.23776	0.00915522	0.763877		Tipin				Pate4	-0.155482	-2.88466	0.0156974	0.999829		Vps54
Gcnt4	-1.38329	-3.61761	0.00338751	0.586426		CAAA01141682.1	Mterf2	Gm4961	Gm7002		Lbhd2	-1.74197	-3.18317	0.00685126	0.914074		Rab3gap2		Greb1l	0.986762	3.82543	0.00431647	0.249652		Tmem129	Elf2			Satl1		Ocel1	0.315553	3.22907	0.00928946	0.763877		Tmem205				8430408G22Rik	0.436525	2.88135	0.0157881	0.999829		Wfdc15a
Gm32983	-1.53786	-3.61606	0.00339727	0.586426		Daglb	Med22	Gm8723	Mmp15		Mfsd7a	-0.969182	-3.16904	0.00704402	0.914074		Runx1t1		n-R5s105	-0.738055	-3.82089	0.004346	0.249652		Dph6	Prkcq			Wnt10a		Malat1	0.498395	3.22718	0.00931889	0.763877		Tmem242				Sbk3	0.288128	2.87653	0.0159212	0.999829		Wnt3
Gm37811	-1.00601	-3.60388	0.00347516	0.586426		Nme6	Ppp4r1l-ps	Olfr318	Keap1		Gm38192	-0.891024	-3.16795	0.00705913	0.914074		Mkrn2os		Gmfg	-0.698088	-3.81402	0.00439104	0.249652		Trim29	Socs2			Edrf1		Ndufb7	-0.224918	-3.22121	0.0094126	0.763877		Tmem243				Fstl3	-0.507299	-2.87439	0.0159807	0.999829		Wnt8a
Rap1gap	0.793217	3.60225	0.0034857	0.586426		Nim1k	Tkt	Gm3962	Naa40		Gm9954	1.24277	3.16684	0.00707454	0.914074		Mapt		Synpr	-0.793431	-3.80677	0.00443914	0.249652		Grm5	F11r			Tmem171		B230312C02Rik	-0.307307	-3.21558	0.00950186	0.763877		Tmem97				A4gnt	-0.191074	-2.87147	0.0160621	0.999829		Xkr6
Gm15129	-1.37146	-3.59293	0.00354674	0.586426		Gm11295	Cog7	Asphd1	Anapc7		Cux2	0.933352	3.15885	0.00718637	0.914074		Gm17136		Zc3h7a	0.383118	3.8065	0.00444089	0.249652		Ddx6	Erlin1			Zfp292		Kcnk9	0.41265	3.21513	0.00950901	0.763877		Toporsos				Idi1	-0.193838	-2.86976	0.0161102	0.999829		Zfp772
Sh3bgrl3	0.659494	3.58898	0.00357287	0.586426		Hmgb1-ps3	Gm17827	Gm15568	Gm5750		Chrm5	-0.956071	-3.15211	0.00728218	0.914074		Amer1		Myo19	0.987553	3.78563	0.00458249	0.249652		Gm136	Ltc4s			Vps26b		Gbp3	-0.794606	-3.21025	0.00958709	0.763877		Trim75				Daw1	-0.176651	-2.86389	0.0162758	0.999829
A330041J22Rik	-1.41228	-3.58667	0.00358827	0.586426		Ilkap	Vbp1	Il2rb	Mccc1os		Gm10658	0.999577	3.15176	0.00728712	0.914074		Tcp11l1		Snrpf	-0.539935	-3.78041	0.0046187	0.249652		Atf1	Smarcad1			Eif5b		Usf2	-0.168473	-3.20933	0.00960187	0.763877		Trip10				Mpz	-0.173461	-2.86381	0.0162781	0.999829
Gm10012	-1.28123	-3.57552	0.00366355	0.586426		Gm26721	Orai2	4930447C04Rik	Gm19222		Cacna2d2	-1.28503	-3.15159	0.00728964	0.914074		Mtx1		BC030499	1.07607	3.77525	0.00465475	0.249652		Mdga2	Gpr37l1			Trat1		Zfp672	0.195579	3.20438	0.009682	0.763877		Tssc1				Rgs22	-0.282068	-2.86359	0.0162843	0.999829
Gm11843	-1.04076	-3.56704	0.00372194	0.586426		Gm26653	Gm5040	AC155268.1	Pdap1		Gm7125	-0.548188	-3.14808	0.00733995	0.914074		Eif2ak4		n-R5s111	-0.700156	-3.77376	0.0046652	0.249652		Smarcd3	Aldh2			Cog8		Rab11fip1	-0.548334	-3.20156	0.00972793	0.763877		Ttc1				4930474M22Rik	0.202586	2.85864	0.0164254	0.999829
Cbx4	1.0207	3.56678	0.00372369	0.586426		Gm26672	Sipa1	Nfe2l1	Slit1		Slc26a2	-1.24103	-3.14731	0.0073511	0.914074		Gm46190		Rxfp1	0.655752	3.77058	0.00468759	0.249652		Bub3	Scarb2			Wdr3		Vwf	-0.543724	-3.1999	0.00975496	0.763877		Txlnb				4933413J09Rik	-0.20693	-2.858	0.0164436	0.999829
Slc29a1	1.32639	3.56506	0.00373569	0.586426		Pcdha2	Gm12842	Gm4908	Gm43471		Crygn	-0.72542	-3.14637	0.00736467	0.914074		Gan		BC016548	-0.29917	-3.76654	0.00471622	0.249652		Hhex	Pon2			Hspb7		Rgs13	0.291209	3.19872	0.00977425	0.763877		Ubb				Podxl	0.272378	2.85633	0.0164915	0.999829
Gm48795	-1.91828	-3.55769	0.00378731	0.586426		Fbxo30		Gm11198	Svop		Ap1s2	-1.33791	-3.14356	0.00740544	0.914074		Rtkn2		Atp1a1	0.520486	3.76384	0.00473553	0.249652		Rap2b	Tubb2a-ps2			Zbtb24		AI662270	-0.464656	-3.19757	0.00979314	0.763877		Ubr7				Trerf1	0.174367	2.8515	0.0166311	0.999829
Adgrb2	0.900282	3.55284	0.00382175	0.586426		Brf2		Dhx30	Pgd		Asb4	-1.8438	-3.14149	0.00743556	0.914074		Gm43062		Ninj2	-0.621919	-3.76287	0.0047424	0.249652		Tspan7	Btd			Pcdha8		Rhod	-0.327203	-3.19547	0.00982782	0.763877		Uck2				Gdf5	-0.219832	-2.84791	0.0167355	0.999829
Celf3	1.01639	3.54819	0.00385497	0.586426		Msc		Scand1	Scamp4		Isl1	-1.90752	-3.13969	0.00746196	0.914074		Akt3		Hmgn1	-0.456737	-3.75846	0.00477412	0.249652		Tmem144	Mxd4			Usp8		Rev3l	0.223281	3.19449	0.0098439	0.763877		Uqcrc1				Lima1	0.19608	2.82262	0.0174896	0.999829
Yaf2	-0.724828	-3.53814	0.00392796	0.586426		Ccl6		AC124681.1	Ctdnep1		Akt3	0.72601	3.13574	0.00752	0.914074		Gm19531		Sox2ot	-0.509991	-3.75806	0.004777	0.249652		Lix1l	Ncf1			Syp		Mas1	0.283526	3.18769	0.00995686	0.763877		Vps45				Chrna2	0.279972	2.81951	0.0175849	0.999829
Slc16a9	-1.48904	-3.53148	0.00397705	0.586426		Prox2os		Gm7132	Zbtb48		Lingo1	0.950207	3.13411	0.007544	0.914074		P2rx6		Adra1d	0.937816	3.75762	0.00478013	0.249652		Tbc1d10a	Yy1			Rpia		1700020L24Rik	-0.480912	-3.17926	0.0100989	0.763877		Zfp965				Spata17	0.188586	2.81623	0.0176856	0.999829
Gm16581	1.00745	3.52968	0.0039904	0.586426							Prss56	-0.868265	-3.12976	0.00760877	0.914074				Mir1906-2	0.4847	3.74005	0.00490871	0.249652		Dlx3	Znrf2			Plcd3		Gen1	0.346908	3.17631	0.0101489	0.763877						Riiad1	-0.309727	-2.80568	0.0180139	0.999829
Scai	-0.793221	-3.52849	0.0039993	0.586426							Troap	-0.817685	-3.12817	0.00763254	0.914074				Trpa1	0.210545	3.73478	0.00494795	0.249652		Slc2a5				Pcsk2		Fkbp2	-0.217622	-3.1744	0.0101815	0.763877						Cd300lg	0.193643	2.80387	0.0180708	0.999829
Cend1	0.698995	3.52655	0.0040138	0.586426							Tnnc1	1.40069	3.12791	0.00763644	0.914074				Dffb	0.564037	3.7313	0.00497409	0.249652								Ifitm3	-0.788965	-3.17156	0.0102303	0.763877						Pspn	0.167988	2.80367	0.0180772	0.999829
Pex6	1.24852	3.51723	0.0040842	0.586426							Etl4	1.18334	3.12745	0.00764332	0.914074				Tmem100	-0.69427	-3.72253	0.00504057	0.249652								Pfn3	0.182323	3.16824	0.0102874	0.763877						Epsti1	-0.309225	-2.80366	0.0180776	0.999829
Gm33869	-1.38037	-3.51709	0.00408524	0.586426							Oxt	-1.07001	-3.11761	0.00779237	0.914074				Olfr692	0.357577	3.71474	0.00510033	0.249652								Mettl21a	-0.211634	-3.16605	0.0103254	0.763877						Prorsd1	-0.246116	-2.80027	0.0181847	0.999829
Atxn7l3	0.859563	3.51598	0.00409377	0.586426							Pirb	-0.605443	-3.11478	0.00783586	0.914074				Gm15708	0.375039	3.71291	0.00511452	0.249652								Rfx3	0.298573	3.16355	0.0103688	0.763877						Sgms1	0.178119	2.79836	0.0182454	0.999829
Ftl1-ps1	1.34434	3.5159	0.00409436	0.586426							R74862	-1.17597	-3.11448	0.00784046	0.914074				Odf3b	0.431992	3.7074	0.00515742	0.249652								Ints2	0.273773	3.16343	0.0103708	0.763877						Rida	-0.171407	-2.79791	0.0182597	0.999829
Gm4760	1.53007	3.51156	0.00412766	0.586426							Gm7584	1.04923	3.09364	0.0081677	0.914074				Gm16853	0.4276	3.70072	0.0052099	0.249652								Ocln	-0.415823	-3.16007	0.0104297	0.763877						Hyou1	0.241119	2.79509	0.0183495	0.999829
Ptov1	1.02895	3.50935	0.00414471	0.586426							Zbtb18	0.977309	3.09201	0.00819387	0.914074				Gm4461	0.266597	3.69653	0.00524309	0.249652								Mir703	-0.414039	-3.15216	0.0105693	0.763877						Bnipl	-0.183897	-2.79501	0.0183523	0.999829
2010300C02Rik	0.801314	3.50484	0.00417977	0.586426							Nr4a2	2.21213	3.09096	0.0082108	0.914074				Zcchc7	0.597346	3.69547	0.00525158	0.249652								Gria2	0.165775	3.14017	0.0107845	0.763877						Mfsd2b	0.244696	2.79404	0.0183834	0.999829
Gm34248	0.541948	3.50407	0.00418575	0.586426							C130060C02Rik	-0.604883	-3.09067	0.00821545	0.914074				Cfap161	-0.581354	-3.69242	0.00527597	0.249652								Serinc4	0.452474	3.1392	0.0108021	0.763877						LOC105246056	-0.264141	-2.78977	0.0185205	0.999829
Atp8b1	-1.42912	-3.50381	0.0041878	0.586426							Gm19088	-1.09492	-3.09042	0.00821952	0.914074				Gm6548	-0.596046	-3.69036	0.00529241	0.249652								Znrf3	0.228213	3.13684	0.0108451	0.763877						Gm16740	-0.323504	-2.78812	0.018574	0.999829
Snx22	1.09409	3.50114	0.00420871	0.586426							Gm11110	-0.751395	-3.08773	0.00826286	0.914074				Hist1h2bl	-0.505971	-3.69024	0.0052934	0.249652								Nr2c2ap	-0.215421	-3.13487	0.010881	0.763877						Tnnc2	0.176586	2.78023	0.0188312	0.999829
Dbp	1.25299	3.49945	0.00422206	0.586426							Lcn2	-0.896487	-3.08707	0.00827362	0.914074				Ctsc	-0.663841	-3.68409	0.00534307	0.249652								Pla2g4a	-0.351042	-3.1338	0.0109007	0.763877						Cfap53	0.276685	2.77498	0.0190045	0.999829
Syngr3	0.768694	3.49856	0.0042291	0.586426							Vmn1r71	-1.14609	-3.08598	0.00829141	0.914074				Cspp1	0.535511	3.68363	0.00534683	0.249652								Lyrm9	0.260503	3.1331	0.0109135	0.763877						Qprt	-0.190159	-2.77281	0.0190765	0.999829
Pcyt2	0.918753	3.49283	0.0042746	0.586426							Cfap221	-1.04476	-3.08481	0.00831041	0.914074				Ankrd16	0.518514	3.68299	0.00535198	0.249652								Chrna7	0.39478	3.13233	0.0109276	0.763877						Dcdc2a	-0.181643	-2.77016	0.0191647	0.999829
Gm14584	-1.03178	-3.4894	0.00430202	0.586426							2600006K01Rik	-1.30021	-3.08322	0.00833644	0.914074				Thpo	1.34797	3.68206	0.00535959	0.249652								Cfap126	-0.473743	-3.13183	0.0109368	0.763877						Padi6	0.368554	2.77002	0.0191695	0.999829
5830416I19Rik	-0.868632	-3.48927	0.00430305	0.586426							Gm6555	0.983164	3.08307	0.00833881	0.914074				4930404I05Rik	0.655439	3.68042	0.00537298	0.249652								Ppp1r12a	0.298272	3.13083	0.0109553	0.763877						Trim43b	0.216472	2.7668	0.0192776	0.999829
Tnrc6c	0.915267	3.4794	0.0043832	0.586426							Siglecf	0.88355	3.08056	0.0083799	0.914074				Cahm	-0.471742	-3.6737	0.00542809	0.249652								S1pr4	-0.283174	-3.12768	0.0110136	0.763877						Gnat1	-0.177868	-2.76481	0.0193444	0.999829
Rps7	-1.23078	-3.47556	0.0044147	0.586426							Gm8307	-0.94448	-3.07723	0.00843486	0.914074				Olfml3	-0.64465	-3.66841	0.005472	0.249652								Klhl3	0.436363	3.12292	0.0111021	0.763877						Acot4	0.277857	2.76215	0.0194344	0.999829
Ache	0.997276	3.47394	0.00442813	0.586426							Gm16551	-0.957244	-3.07587	0.00845747	0.914074				F11r	-0.581184	-3.66784	0.00547672	0.249652								Mir6357	0.200101	3.12175	0.0111239	0.763877						Slc22a2	0.204287	2.74899	0.0198855	0.999829
Foxf2	-1.55129	-3.46479	0.00450447	0.586426							H2-Oa	-0.962299	-3.06681	0.00860915	0.914074				Gm26994	0.287496	3.66408	0.00550816	0.249652								Igf2os	-0.305318	-3.11918	0.0111722	0.763877						Rgn	0.211077	2.73772	0.0202803	0.999829
Gm17087	1.2873	3.46348	0.00451552	0.586426							Gm13359	-0.997607	-3.06651	0.00861416	0.914074				ND2	-0.797835	-3.66113	0.00553286	0.249652								Wnt7b	0.226871	3.11863	0.0111825	0.763877						Lsr	0.431605	2.73281	0.0204545	0.999829
Bicdl1	1.17615	3.46333	0.00451679	0.586426							Gm32939	0.962173	3.06299	0.0086738	0.914074				Kcnq1ot1	0.854459	3.65644	0.00557256	0.249652								Susd1	0.225829	3.11643	0.0112239	0.763877						Klhl3	0.254496	2.73249	0.0204661	0.999829
Asphd2	0.740347	3.45924	0.00455147	0.586426							Ctf1	1.18386	3.06287	0.00867593	0.914074				1700124L16Rik	0.309445	3.65628	0.00557388	0.249652								Thoc2	0.163899	3.11603	0.0112315	0.763877						Pcdhga5	-0.18858	-2.73232	0.0204719	0.999829
Parp9	-1.30751	-3.45715	0.00456932	0.586426							Gm37160	0.866126	3.06244	0.00868314	0.914074				Sash3	-0.61148	-3.65607	0.00557566	0.249652								Lax1	0.307305	3.1151	0.0112492	0.763877						Gm19461	-0.321569	-2.73172	0.0204934	0.999829
Fsbp	-1.80669	-3.45073	0.00462448	0.586426							Ahrr	0.789713	3.06193	0.00869178	0.914074				Loxhd1	0.264824	3.6549	0.00558564	0.249652								Mrps7	-0.195471	-3.10984	0.0113493	0.763877						AI987944	-0.181549	-2.72793	0.0206294	0.999829
Cbarp	0.798632	3.44899	0.00463959	0.586426							1700084E18Rik	-0.674548	-3.06095	0.00870849	0.914074				Ncf4	-0.54901	-3.65378	0.00559519	0.249652								Olfr267	0.202762	3.10951	0.0113556	0.763877						4930552P12Rik	-0.224595	-2.7279	0.0206306	0.999829
Brf2	-1.14552	-3.44373	0.00468538	0.586426							Gm7530	-0.897419	-3.05862	0.00874847	0.914074				Zbtb16	1.53071	3.64225	0.00569431	0.249652								3830432H09Rik	-0.218592	-3.10864	0.0113722	0.763877						Bcl2l15	-0.401844	-2.72507	0.0207326	0.999829
Ms4a6c	-0.835555	-3.4418	0.00470233	0.586426							Frrs1	-1.23528	-3.05467	0.00881641	0.914074				Klf14	0.528337	3.63803	0.00573109	0.249652								Xpo5	0.269649	3.10428	0.011456	0.763877						Slc10a3	0.287323	2.7222	0.0208364	0.999829
[truncated: 3,499 more rows]

## Sheet: stratified apoe DE WGCNA 5%fdr
Female E4/E3	logFC	t	P.Value	adj.P.Val		M18	M19	M20	M21		Male E4/E3	logFC	t	P.Value	adj.P.Val		M22	M23	M24	M25	M26	M27	M28	M29	M30	M31	M32
[truncated: 151 more rows]

[truncated: 2 more sheets: E4 overlap with nPM male, E4 overlap with nPM female]
